# Supplementary material for: Discovery of the Widespread Site-Specific Single-Stranded Nuclease Family Ssn
Source: Research Square preprint supplement (doi:10.21203/rs.3.rs-4622751/v1), 2024-07-15
Supplement: Supplementary file 1 [file bf32b7c41664fa5bb4fe97e8.xlsx]

## Sheet: Table S1
Table S1. Neisseriaceae genomes used in this study, and results of motif searches
Species	Strain	Accession	DUS	NTS	NTSvar	Sequence Source
Alysiella crassa	DSM 2578	GCA_022871045.1	6121	1	0	Nyongesa et al. 2022
Alysiella filiformis	DSM 16848	GCA_014054525.1	4080	1	0	Nyongesa et al. 2022
Chitinolyticbacter meiyuanensis	SYBC-H1	GCA_008033135.1	2	0	0	NCBI
Conchiformibius khuniae	DSM 17694	GCA_022871025.1	484	102	0	Nyongesa et al. 2022
Conchiformibius steedae	DSM 2580	GCA_014054725.1	150	0	0	Nyongesa et al. 2022
Crenobacter cavernae	K1W11S-77	GCA_003355495.1	3	0	0	NCBI
Crenobacter intestini	GY 70310	GCA_004919095.1	0	0	0	NCBI
Crenobacter luteus	DSM 27258	GCA_004345725.1	1	0	0	NCBI
Crenobacter sedimenti	HX-7-9	GCA_010435965.1	2	0	0	NCBI
Eikenella corrodens	NCTC10596	GCA_900187105.1	3082	0	0	NCBI
Eikenella exigua	PXX	GCA_008805035.1	2408	0	0	NCBI
Eikenella halliae	NML130454	GCA_001648475.1	3511	1	0	NCBI
Eikenella longinqua	NML02-A-017	GCA_001648355.1	3359	0	0	NCBI
Kingella bonacorsii	Marseille-Q4569	GCA_016623605.1	4706	10	0	NCBI
Kingella denitrificans	FDAARGOS_1060	GCA_016127355.1	3158	0	0	NCBI
Kingella kingae	DSM 7536	GCA_022871005.1	2799	3	0	Nyongesa et al. 2022
Kingella negevensis	SW7208426	GCA_900177895.1	2096	0	0	NCBI
Kingella oralis	DSM 18271	GCA_014054985.1	4708	28	0	Nyongesa et al. 2022
Morococcus cerebrosus	CIP 81.93	GCA_000813705.1	2700	63	0	NCBI
Neisseria animalis	ATCC 49930	GCA_008806995.1	643	1	0	NCBI
Neisseria animaloris	NCTC12228	GCA_900637855.1	2840	0	2	NCBI
Neisseria arctica	DSM 103136	GCA_022870905.1	1605	0	0	Nyongesa et al. 2022
Neisseria bacilliformis	DSM 23338	GCA_014055025.1	4478	59	0	Nyongesa et al. 2022
Neisseria benedictiae	M091	GCA_958267435.1	2120	144	0	NCBI
Neisseria bergeri	M40463	GCA_003490325.1	2168	225	0	NCBI
Neisseria blantyrii	M338	GCA_962747465.1	2198	197	0	NCBI
Neisseria brasiliensis	N.177.16	GCA_009671065.1	3426	47	0	NCBI
Neisseria canis	NCTC10296	GCA_900636765.1	2485	0	95	NCBI
Neisseria chenwenguii	10023	GCA_002216145.1	3947	36	0	NCBI
Neisseria cinerea	NCTC10294	GCA_900475315.1	1798	1	0	NCBI
Neisseria denitrificans	CCUG17229	ctg.s1.000000F.arrow	2971	41	0	this study
Neisseria denitrificans	DSMZ17675	ctg.s1.0.arrow	1871	37	0	this study
Neisseria dentiae	DSM 19151	GCA_014055005.1	3072	142	139	Nyongesa et al. 2022
Neisseria dumasiana	DSM 104677	GCA_022870885.1	2764	0	39	Nyongesa et al. 2022
Neisseria elongata	ATCC 29315	GCA_000818035.1	3205	23	0	Nyongesa et al. 2022
Neisseria flavescens	ATCC 13120	GCA_005221285.1	2654	8	0	NCBI
Neisseria gonorrhoeae	LNP16626	gonorrhoeae	1849	149	0	this study
Neisseria iguanae	ATCC 51483	GCA_003013245.1	2046	10	0	NCBI
Neisseria lactamica	NCTC10617	GCA_901482445.1	2084	145	0	NCBI
Neisseria lactamica	NS19	GCA_000193795.1	1986	172	0	NCBI
Neisseria macacae	ATCC 33926	GCA_022749495.1	3213	30	0	NCBI
Neisseria maigaei	02_01105_XS1_1	GCA_958267405.1	2154	181	0	NCBI
Neisseria meningitidis	8013	GCA_000026965.1	1830	498	0	NCBI
Neisseria montereyensis	CSL10203-ORH2	GCA_024834045.1	2026	0	0	NCBI
Neisseria mucosa	ATCC 19696	GCA_003028315.1	2827	55	0	NCBI
Neisseria mucosa	heidelbergensis	ctg.s1.000000F.arrow	4257	48	0	this study
Neisseria musculi	NW831	GCA_014297595.1	2817	5	16	NCBI
Neisseria polysaccharea	DSM 18304		2096	121	0	this study
Neisseria potus	3SID1128	GCA_022870985.1	4254	12	0	Nyongesa et al. 2022
Neisseria shayeganii	DSM 22244	GCA_014054965.1	1917	0	0	Nyongesa et al. 2022
Neisseria sicca	DSM 17713	GCA_014054945.1	3212	25	0	NCBI
Neisseria sp	3896	GCF_028776105.1	2098	0	0	NCBI
Neisseria sp	83E034	GCA_001308015.1	2464	0	70	NCBI
Neisseria sp	DentCa1247	GCA_022870825.1	3312	0	33	Nyongesa et al. 2022
Neisseria sp	KEM232	GCA_002237445.1	4499	17	0	NCBI
Neisseria sp	LNP16475	gnl|X|FCIMFJAP_1	2727	52	0	this study
Neisseria sp	oral taxon014 str.F0314	GCA_005886145.1	3303	83	0	NCBI
Neisseria subflava	ATCC 49275	GCA_005221305.1	2687	1	0	NCBI
Neisseria subflava	M18660	GCA_003351665.1	2736	1	0	NCBI
Neisseria uirgultaei	12_13988_XS2_1	GCA_962707505.1	2140	189	0	NCBI
Neisseria viridiae	M101	GCA_962747945.1	2079	153	0	NCBI
Neisseria wadsworthii	DSM 22245	GCA_014054885.1	2451	0	100	Nyongesa et al. 2022
Neisseria weaveri	NCTC12742	GCA_900638685.1	2731	0	5	NCBI
Neisseria weixii	10022	GCA_002327085.1	2791	32	0	NCBI
Neisseria yangbaofengii	ZJ785	GCA_014898075.1	3088	6	0	NCBI
Neisseria zalophi	ATCC BAA-2455	GCA_008807015.1	1986	0	0	NCBI
Neisseria zoodegmatis	NCTC12230	GCA_900187305.1	3113	0	46	NCBI
Simonsiella muelleri	ATCC 29453	GCA_002951835.1	3759	0	0	Nyongesa et al. 2022
Snodgrassella alvi	wkB2 DSM 104735	GCA_022870965.1	20	0	0	Nyongesa et al. 2022
Stenoxybacter acetivorans	DSM 19021	GCA_000745895.1	1430	0	0	NCBI
Uruburuella suis	DSMZ 17474	GCA_022870845.1	3616	0	0	Nyongesa et al. 2022
Uruburuella testudinis	DSMZ 26510	GCA_022870865.1	3519	0	0	Nyongesa et al. 2022
Vitreoscilla massiliensis	DSM 100958	GCA_022870925.1	7	0	0	Nyongesa et al. 2022
Vitreoscilla stercoraria	DSM 513	GCA_022870945.1	3	0	0	Nyongesa et al. 2022
Wielerella bovis	CCUG 44465	GCA_022354425.1	4189	3	0	NCBI

## Sheet: Table S2
Table S2. Functional annotations of genes flanked by NTS elements in Neisseria meningitidis
Nm 8013 Locus tag	Eggnogmapper query	NCBI Nm 8013 Annotation	COG Category	Description	Seed_Ortholog	Preferred_name	Predicted Localization (PSORTb)
NMV_0017	lcl|FM999788.1_cds_CAX49008.1_16	UDP-3-O-[3-hydroxymyristoyl] N-acetylglucosamine deacetylase (UDP-3-O-acyl-GlcNAc deacetylase)	M	Catalyzes the hydrolysis of UDP-3-O-myristoyl-N- acetylglucosamine to form UDP-3-O-myristoylglucosamine and acetate, the committed step in lipid A biosynthesis	546267.NEIPOLOT_01962	lpxC	Cytoplasmic
NMV_0019	lcl|FM999788.1_cds_CAX49009.1_17	major pilin PilE	NU	Pilin (bacterial filament)	1051985.l11_21880	-	Extracellular
NMV_0022	lcl|FM999788.1_cds_NMV_0022_18	pilS1 cassette	NU	Pilin (bacterial filament)	546268.NEISUBOT_03902	-	Unknown
NMV_0023	lcl|FM999788.1_cds_NMV_0023_19	pilS2 cassette	NU	Pilin (bacterial filament)	1051985.l11_21880	-	Unknown
NMV_0024	lcl|FM999788.1_cds_NMV_0024_20	pilS3 cassette	NU	Pilin (bacterial filament)	546268.NEISUBOT_03902	-	Unknown
NMV_0024.1	lcl|FM999788.1_cds_NMV_0024.1_21	pilS4 cassette	NU	Pilin (bacterial filament)	1051985.l11_21880	-	Unknown
NMV_0044	lcl|FM999788.1_cds_CAX49033.1_41	conserved hypothetical protein	L	GIY-YIG catalytic domain	489653.NLA_6641	-	Unknown
NMV_0045	lcl|FM999788.1_cds_CAX49034.1_42	type IV pilus-associated protein PilC2	NU	Neisseria PilC beta-propeller domain	546267.NEIPOLOT_01596	-	OuterMembrane
NMV_0209	lcl|FM999788.1_cds_CAX49177.1_185	ribonuclease HII (RNase HII)	L	Endonuclease that specifically degrades the RNA of RNA- DNA hybrids	546267.NEIPOLOT_00038	rnhB	Cytoplasmic
NMV_0210	lcl|FM999788.1_cds_CAX49178.1_186	glucose-inhibited division protein A	D	NAD-binding protein involved in the addition of a carboxymethylaminomethyl (cmnm) group at the wobble position (U34) of certain tRNAs, forming tRNA-cmnm(5)s(2)U34	546264.NEIFLAOT_01411	gidA	Cytoplasmic
NMV_0211	lcl|FM999788.1_cds_CAX49179.1_187	putative amino-acid symporter	E	Psort location CytoplasmicMembrane, score 10.00	546267.NEIPOLOT_01615	-	CytoplasmicMembrane
NMV_0212	lcl|FM999788.1_cds_CAX49180.1_188	4-hydroxythreonine-4-phosphate dehydrogenase (4-(phosphohydroxy)-L-threonine dehydrogenase)	H	Catalyzes the NAD(P)-dependent oxidation of 4- (phosphohydroxy)-L-threonine (HTP) into 2-amino-3-oxo-4- (phosphohydroxy)butyric acid which spontaneously decarboxylates to form 3-amino-2-oxopropyl phosphate (AHAP)	489653.NLA_1550	pdxA	Cytoplasmic
NMV_0213	lcl|FM999788.1_cds_CAX49181.1_189	IS1655 transposase	L	PFAM Integrase catalytic	546266.NEIMUCOT_05264	-	Cytoplasmic
NMV_0235	lcl|FM999788.1_cds_CAX49199.1_207	conserved hypothetical integral membrane protein	P	Probably functions as a manganese efflux pump	546267.NEIPOLOT_01688	mntP	CytoplasmicMembrane
NMV_0236	lcl|FM999788.1_cds_CAX49200.1_208	catalase	C	Belongs to the catalase family	489653.NLA_1790	-	Periplasmic
NMV_0237	lcl|FM999788.1_cds_NMV_0237_209	truncated RNA polymerase sigma-54 factor (pseudogene part 1)	K	Sigma factors are initiation factors that promote the attachment of RNA polymerase to specific initiation sites and are then released	546267.NEIPOLOT_01248	rpoN	Cytoplasmic
NMV_0237.1		truncated RNA polymerase sigma-54 factor (pseudogene part 2)					Unknown
NMV_0266	lcl|FM999788.1_cds_CAX49227.1_235	putative spermidine synthase (putrescine aminopropyltransferase; SPDSY)	S	Spermidine synthase	1072685.IX83_05845	-	CytoplasmicMembrane
NMV_0267	lcl|FM999788.1_cds_CAX49228.1_236	NADH-quinone oxidoreductase chain A (NADH dehydrogenase I, chain A; NDH-1, chain A)	C	NDH-1 shuttles electrons from NADH, via FMN and iron- sulfur (Fe-S) centers, to quinones in the respiratory chain. The immediate electron acceptor for the enzyme in this species is believed to be ubiquinone. Couples the redox reaction to proton translocation (for every two electrons transferred, four hydrogen ions are translocated across the cytoplasmic membrane), and thus conserves the redox ene…	546262.NEICINOT_04351	nuoA	CytoplasmicMembrane
NMV_0343	lcl|FM999788.1_cds_CAX49295.1_303	putative adenylate cyclase	S	Adenylate cyclase	489653.NLA_3670	-	Unknown
NMV_0344	lcl|FM999788.1_cds_CAX49296.1_304	conserved hypothetical integral membrane protein	S	Psort location CytoplasmicMembrane, score	489653.NLA_3680	-	CytoplasmicMembrane
NMV_0345	lcl|FM999788.1_cds_CAX49297.1_305	hypothetical protein	-	-	546274.EIKCOROL_00709	-	Unknown
NMV_0346	lcl|FM999788.1_cds_CAX49298.1_306	autotransporter A	MU	Autotransporter beta-domain	489653.NLA_3700	-	Extracellular
NMV_0347	lcl|FM999788.1_cds_CAX49299.1_307	conserved hypothetical TPR-containing periplasmic protein	M	Protein of unknown function (DUF560)	489653.NLA_3710	-	Unknown
NMV_0348	lcl|FM999788.1_cds_CAX49300.1_308	conserved hypothetical protein	S	Protein conserved in bacteria	489653.NLA_3720	-	Unknown
NMV_0477	lcl|FM999788.1_cds_CAX49410.1_418	conserved hypothetical protein	S	AcnD-accessory protein PrpF	546268.NEISUBOT_04808	prpF	Cytoplasmic
NMV_0479	lcl|FM999788.1_cds_CAX49412.1_420	conserved hypothetical protein	J	Belongs to the SUA5 family	546267.NEIPOLOT_01319	yciO	Cytoplasmic
NMV_0480	lcl|FM999788.1_cds_CAX49413.1_421	putative HTH-type transcriptional regulator	K	transcriptional regulator, Rrf2 family	546267.NEIPOLOT_00349	nsrR	Unknown
NMV_0481	lcl|FM999788.1_cds_CAX49414.1_422	hypothetical protein	S	Psort location Cytoplasmic, score 8.96	489653.NLA_4810	-	Unknown
NMV_0482	lcl|FM999788.1_cds_CAX49415.1_423	putative NnrS-like protein	P	Psort location CytoplasmicMembrane, score 10.00	546267.NEIPOLOT_00347	-	CytoplasmicMembrane
NMV_0483	lcl|FM999788.1_cds_CAX49416.1_424	putative prephenate dehydrogenase (PDH)	C	prephenate dehydrogenase	546267.NEIPOLOT_00346	-	Cytoplasmic
NMV_0485	lcl|FM999788.1_cds_NMV_0485_426	opacity protein A (pseudogene part 2)	M	Has lipid A 3-O-deacylase activity. Hydrolyzes the ester bond at the 3 position of lipid A, a bioactive component of lipopolysaccharide (LPS), thereby releasing the primary fatty acyl moiety	489653.NLA_13360	tia	OuterMembrane
NMV_0485.1		opacity protein A (pseudogene part 1)					Unknown
NMV_0486	lcl|FM999788.1_cds_CAX49420.1_428	IS1655 transposase	L	PFAM Integrase catalytic	546266.NEIMUCOT_05264	-	Cytoplasmic
NMV_0488	lcl|FM999788.1_cds_CAX49421.1_429	putative transporter	EG	Psort location CytoplasmicMembrane, score 10.00	546267.NEIPOLOT_00343	-	CytoplasmicMembrane
NMV_0504	lcl|FM999788.1_cds_CAX49436.1_444	conserved hypothetical protein	S	Fic/DOC family N-terminal	1120980.JQKH01000095_gene2077	-	Cytoplasmic
NMV_0506	lcl|FM999788.1_cds_CAX49437.1_445	transferrin-binding protein 2 (TbpB)	S	C-lobe handle domain of Tf-binding protein B	489653.NLA_4980	tbpB	Extracellular
NMV_0507	lcl|FM999788.1_cds_CAX49438.1_446	transferrin-binding protein 1 (TbpA)	P	TonB-dependent lactoferrin and transferrin receptor	489653.NLA_4990	tbpA	OuterMembrane
NMV_0762	lcl|FM999788.1_cds_NMV_0762_663	IS1655 transposase (pseudogene part 2)	L	PFAM Integrase catalytic	546266.NEIMUCOT_05264	-	Unknown
NMV_0763	lcl|FM999788.1_cds_NMV_0763_664	IS1655 transposase (pseudogene part 1)	L	PFAM Integrase catalytic	546266.NEIMUCOT_05264	-	Cytoplasmic
NMV_0766	lcl|FM999788.1_cds_CAX49658.1_666	fumarate hydratase class I (fumarase)	C	Catalyzes the reversible hydration of fumarate to (S)- malate	546267.NEIPOLOT_01115	fumA	Cytoplasmic
NMV_0767	lcl|FM999788.1_cds_CAX49659.1_667	putative amino acid-binding lipoprotein (HBP)	ET	Belongs to the bacterial solute-binding protein 3 family	546267.NEIPOLOT_00627	-	Periplasmic
NMV_0768	lcl|FM999788.1_cds_CAX49660.1_668	hypothetical protein	-	-	489653.NLA_6760	-	Cytoplasmic
NMV_0769	lcl|FM999788.1_cds_CAX49661.1_669	hypothetical protein	-	-	546262.NEICINOT_04925	-	Cytoplasmic
NMV_0848	lcl|FM999788.1_cds_CAX49730.1_738	lactoferrin-binding protein B (LbpB)	S	N-Lobe handle Tf-binding protein B	546262.NEICINOT_03578	-	Unknown
NMV_0849	lcl|FM999788.1_cds_CAX49731.1_739	lactoferrin-binding protein A (LbpA)	P	TonB-dependent Receptor Plug Domain	489653.NLA_15490	-	OuterMembrane
NMV_0894	lcl|FM999788.1_cds_CAX49774.1_782	putative TonB-dependent receptor	M	Psort location OuterMembrane, score 10.00	489653.NLA_7810	-	OuterMembrane
NMV_0919.1		opacity protein C (pseudogene part 1)					Unknown
NMV_0920	lcl|FM999788.1_cds_NMV_0920_807	opacity protein C (pseudogene part 2)	M	Has lipid A 3-O-deacylase activity. Hydrolyzes the ester bond at the 3 position of lipid A, a bioactive component of lipopolysaccharide (LPS), thereby releasing the primary fatty acyl moiety	489653.NLA_13360	tia	OuterMembrane
NMV_1383	lcl|FM999788.1_cds_NMV_1383_1231	truncated rubredoxin (N-terminal 75% of the protein)	C	Psort location Cytoplasmic, score	489653.NLA_12320	-	Unknown
NMV_1469.1		opacity protein D (pseudogene part 1)					Unknown
NMV_1470	lcl|FM999788.1_cds_NMV_1470_1307	opacity protein D (pseudogene part 2)	M	Has lipid A 3-O-deacylase activity. Hydrolyzes the ester bond at the 3 position of lipid A, a bioactive component of lipopolysaccharide (LPS), thereby releasing the primary fatty acyl moiety	489653.NLA_13360	tia	OuterMembrane
NMV_1510	lcl|FM999788.1_cds_CAX50334.1_1342	type IV pilus biogenesis protein PilK	NU	Type IV pilus assembly protein PilX C-term	489653.NLA_13500	-	Unknown
NMV_1511	lcl|FM999788.1_cds_CAX50335.1_1343	type IV pilus biogenesis protein PilJ	NU	pilus assembly protein PilW	546267.NEIPOLOT_01568	-	Unknown
NMV_1512	lcl|FM999788.1_cds_CAX50336.1_1344	type IV pilus biogenesis protein PilI	NU	type IV pilus modification protein PilV	489653.NLA_13520	pilV	Unknown
NMV_1513	lcl|FM999788.1_cds_CAX50337.1_1345	type IV pilus biogenesis protein PilH	NU	Type II transport protein GspH	489653.NLA_13530	-	Unknown
NMV_1514	lcl|FM999788.1_cds_CAX50338.1_1346	replicative DNA helicase	L	it exhibits DNA-dependent ATPase activity and contains distinct active sites for ATP binding, DNA binding, and interaction with DnaC protein, primase, and other prepriming proteins	546267.NEIPOLOT_01571	dnaB	Cytoplasmic
NMV_1516	lcl|FM999788.1_cds_CAX50340.1_1348	conserved hypothetical integral membrane protein	S	protein conserved in bacteria	857571.EA1_05392	-	CytoplasmicMembrane
NMV_1517	lcl|FM999788.1_cds_CAX50341.1_1349	hypothetical protein	S	Psort location Cytoplasmic, score 8.96	489653.NLA_13560	-	Unknown
NMV_1519	lcl|FM999788.1_cds_CAX50342.1_1350	sulfate transport system permease protein CysT	P	Sulfate ABC transporter, permease protein CysT	489653.NLA_13570	cysT	CytoplasmicMembrane
NMV_1712	lcl|FM999788.1_cds_CAX50525.1_1533	putative Era-like GTP-binding protein	S	An essential GTPase that binds both GDP and GTP, with rapid nucleotide exchange. Plays a role in 16S rRNA processing and 30S ribosomal subunit biogenesis and possibly also in cell cycle regulation and energy metabolism	489653.NLA_15530	era	CytoplasmicMembrane
NMV_1713	lcl|FM999788.1_cds_CAX50526.1_1534	ribonuclease III (RNase III)	J	Digests double-stranded RNA. Involved in the processing of primary rRNA transcript to yield the immediate precursors to the large and small rRNAs (23S and 16S). Processes some mRNAs, and tRNAs when they are encoded in the rRNA operon. Processes pre- crRNA and tracrRNA of type II CRISPR loci if present in the organism	489653.NLA_15540	rnc	Cytoplasmic
NMV_1714	lcl|FM999788.1_cds_CAX50527.1_1535	conserved hypothetical protein	S	Protein of unknown function (DUF2185)	489653.NLA_15550	-	Unknown
NMV_1715	lcl|FM999788.1_cds_CAX50528.1_1536	6,7-dimethyl-8-ribityllumazine synthase (DMRL synthase; lumazine synthase; riboflavin synthase beta chain)	H	Catalyzes the formation of 6,7-dimethyl-8- ribityllumazine by condensation of 5-amino-6-(D- ribitylamino)uracil with 3,4-dihydroxy-2-butanone 4-phosphate. This is the penultimate step in the biosynthesis of riboflavin	546262.NEICINOT_03588	ribH	Cytoplasmic
NMV_1716	lcl|FM999788.1_cds_CAX50529.1_1537	N utilization substance protein B (NusB protein)	K	Involved in transcription antitermination. Required for transcription of ribosomal RNA (rRNA) genes. Binds specifically to the boxA antiterminator sequence of the ribosomal RNA (rrn) operons	546262.NEICINOT_03589	nusB	Unknown
NMV_1719	lcl|FM999788.1_cds_CAX50532.1_1540	conserved hypothetical periplasmic protein	S	CNP1-like family	489653.NLA_15620	-	Unknown
NMV_1720	lcl|FM999788.1_cds_CAX50533.1_1541	acetyl-coenzyme A carboxylase carboxyl transferase subunit beta (ACCase beta chain)	I	Component of the acetyl coenzyme A carboxylase (ACC) complex. Biotin carboxylase (BC) catalyzes the carboxylation of biotin on its carrier protein (BCCP) and then the CO(2) group is transferred by the transcarboxylase to acetyl-CoA to form malonyl- CoA	546262.NEICINOT_03594	accD	Cytoplasmic
NMV_1721	lcl|FM999788.1_cds_CAX50534.1_1542	tryptophan synthase alpha chain	E	The alpha subunit is responsible for the aldol cleavage of indoleglycerol phosphate to indole and glyceraldehyde 3- phosphate	546267.NEIPOLOT_02185	trpA	Cytoplasmic
NMV_1722	lcl|FM999788.1_cds_CAX50535.1_1543	hypothetical protein	-	-	489653.NLA_15650	-	Unknown
NMV_1973	lcl|FM999788.1_cds_CAX50763.1_1771	shikimate kinase (SK)	F	Catalyzes the specific phosphorylation of the 3-hydroxyl group of shikimic acid using ATP as a cosubstrate	489653.NLA_17490	aroK	Cytoplasmic
NMV_1974	lcl|FM999788.1_cds_CAX50764.1_1772	3-dehydroquinate synthase	E	Catalyzes the conversion of 3-deoxy-D-arabino- heptulosonate 7-phosphate (DAHP) to dehydroquinate (DHQ)	489653.NLA_17500	aroB	Cytoplasmic
NMV_2022	lcl|FM999788.1_cds_CAX50798.1_1806	isoleucyl-tRNA synthetase (isoleucine--tRNA ligase; IleRS)	J	amino acids such as valine, to avoid such errors it has two additional distinct tRNA(Ile)-dependent editing activities. One activity is designated as 'pretransfer' editing and involves the hydrolysis of activated Val-AMP. The other activity is designated 'posttransfer' editing and involves deacylation of mischarged Val-tRNA(Ile)	489653.NLA_17760	ileS	Cytoplasmic
NMV_2023	lcl|FM999788.1_cds_CAX50799.1_1807	riboflavin biosynthesis protein RibF [includes: riboflavin kinase (flavokinase) and FMN adenylyltransferase (FAD pyrophosphorylase; FAD synthetase)	H	Belongs to the ribF family	546262.NEICINOT_04047	ribF	Cytoplasmic
NMV_2037	lcl|FM999788.1_cds_CAX50810.1_1818	type IV pilus-associated protein PilC1	NU	Neisseria PilC beta-propeller domain	489653.NLA_17940	-	OuterMembrane
NMV_2112	lcl|FM999788.1_cds_NMV_2112_1886	ISNme1 transposase (pseudogene part 1)	L	Psort location Cytoplasmic, score 8.96	489653.NLA_17250	-	Unknown
NMV_2113	lcl|FM999788.1_cds_NMV_2113_1887	ISNme1 transposase (pseudogene part 2)	L	Psort location Cytoplasmic, score 8.96	546266.NEIMUCOT_06145	-	Cytoplasmic
NMV_2114	lcl|FM999788.1_cds_CAX50880.1_1888	conserved hypothetical integral membrane protein	S	Belongs to the UPF0225 family	546267.NEIPOLOT_00819	-	Unknown
NMV_2115	lcl|FM999788.1_cds_CAX50881.1_1889	putative inositol-1-monophosphatase (IMPase; inositol-1-phosphatase; I-1-Pase)	G	Inositol-1-monophosphatase	489653.NLA_18690	suhB2	Cytoplasmic
NMV_2116	lcl|FM999788.1_cds_CAX50882.1_1890	conserved hypothetical protein	J	Specifically methylates the N3 position of the uracil ring of uridine 1498 (m3U1498) in 16S rRNA. Acts on the fully assembled 30S ribosomal subunit	546267.NEIPOLOT_00816	rsmE	Cytoplasmic
NMV_2165.1		autotransported serine protease NalP (pseudogene part 1)					Unknown
NMV_2166		autotransported serine protease NalP (pseudogene part 2)					OuterMembrane
NMV_2167	lcl|FM999788.1_cds_CAX50930.1_1938	putative para-aminobenzoate synthase component I (ADC synthase)	EH	Chorismate binding enzyme	489653.NLA_19130	pabB	Cytoplasmic
NMV_2168	lcl|FM999788.1_cds_CAX50931.1_1939	conserved hypothetical TPR-containing membrane-associated protein	H	Psort location OuterMembrane, score 9.49	489653.NLA_19140	-	OuterMembrane
NMV_2169	lcl|FM999788.1_cds_NMV_2169_1940	ISNme1 transposase (pseudogene part 1)	L	Psort location Cytoplasmic, score 8.96	489653.NLA_17250	-	Unknown
NMV_2170	lcl|FM999788.1_cds_NMV_2170_1941	ISNme1 transposase (pseudogene part 2)	L	Psort location Cytoplasmic, score 8.96	546266.NEIMUCOT_06145	-	Cytoplasmic
NMV_2188	lcl|FM999788.1_cds_CAX50950.1_1958	TonB-dependent enterobactin receptor FetA (FrpB)	M	TonB-dependent siderophore receptor	546262.NEICINOT_05131	-	OuterMembrane
NMV_2239	lcl|FM999788.1_cds_CAX50997.1_2005	tRNA pseudouridine synthase A (tRNA-uridine isomerase I; tRNA pseudouridylate synthase I)	J	Formation of pseudouridine at positions 38, 39 and 40 in the anticodon stem and loop of transfer RNAs	546262.NEICINOT_04228	truA	Unknown
NMV_2240	lcl|FM999788.1_cds_CAX50998.1_2006	putative PemI-like protein	T	Antitoxin	1432056.X781_410	-	Unknown
NMV_2241	lcl|FM999788.1_cds_CAX50999.1_2007	putative PemK-like protein	T	PemK-like, MazF-like toxin of type II toxin-antitoxin system	1432056.X781_400	-	Unknown
NMV_2242	lcl|FM999788.1_cds_CAX51000.1_2008	major outer-membrane protein P.IB (protein IB; PIB; porin)	M	Psort location OuterMembrane, score	546262.NEICINOT_04227	porB	OuterMembrane
NMV_2244	lcl|FM999788.1_cds_CAX51001.1_2009	thiamine biosynthesis protein ThiC	H	Catalyzes the synthesis of the hydroxymethylpyrimidine phosphate (HMP-P) moiety of thiamine from aminoimidazole ribotide (AIR) in a radical S-adenosyl-L-methionine (SAM)-dependent reaction	489653.NLA_3430	thiC	Cytoplasmic
NMV_2245	lcl|FM999788.1_cds_CAX51002.1_2010	putative NUDIX hydrolase	L	NUDIX domain	546267.NEIPOLOT_01928	-	Unknown
NMV_2246	lcl|FM999788.1_cds_CAX51003.1_2011	putative ABC transporter ATP-binding protein	E	ABC transporter, ATP-binding protein	546267.NEIPOLOT_01929	potA	CytoplasmicMembrane

## Sheet: Table.S3
Table S3. Quantification of NTS/NTS-like repeats immediately flanking homologs of all proteins in the Nm 8013 proteome
Nm 8013 Protein	Number of genomes with a homologus protein (n)	Fraction of homologs containing NTS elements in flanking genomic regions (%)	Fraction of homologs containing NTS element in both 5’ and 3’ flanking genomic regions (%)	Mean number NTS elements in flanking genomic regions of homologs (n)	Number of genomes containing a homolog that also contain NTS elements	Fraction of homologs containing NTS-like elements in flanking genomic regions (%)	Fraction of homologs containing NTS-like element in both 5’ and 3’ flanking genomic regions (%)	Mean number NTS-like elements in flanking genomic regions of homologs (n)	Number of genomes containing a homolog that also contain NTS-like elements
SSNA_NM8013	416	31.0096	13.9423	0.632212	129	70.6731	39.1827	2.27404	294
CAX50001.1_1009	4	0	0	0	0	25	25	0.5	1
CAX49333.1_341	6	0	0	0	0	50	16.6667	0.666667	3
CAX50600.1_1608	16	0	0	0	0	43.75	12.5	0.5625	7
CAX50648.1_1656	13	0	0	0	0	7.69231	7.69231	0.153846	1
CAX50509.1_1517	17	0	0	0	0	5.88235	5.88235	0.117647	1
CAX50043.1_1051	20	5	5	0.1	1	10	5	0.15	2
CAX49936.1_944	24	0	0	0	0	8.33333	4.16667	0.125	2
CAX49378.1_386	42	0	0	0	0	2.38095	2.38095	0.047619	1
CAX50451.1_1459	42	0	0	0	0	4.7619	2.38095	0.0952381	2
CAX49423.1_431	60	1.66667	0	0.0166667	1	5	1.66667	0.133333	3
CAX50384.1_1392	62	0	0	0	0	12.9032	1.6129	0.16129	8
CAX49773.1_781	1432	0.139665	0	0.00139665	2	13.0587	1.60615	0.164804	187
CAX49905.1_913	63	0	0	0	0	4.7619	1.5873	0.0634921	3
CAX49160.1_168	65	1.53846	0	0.0307692	1	7.69231	1.53846	0.153846	5
CAX49357.1_365	136	0.735294	0.735294	0.0147059	1	5.88235	1.47059	0.0882353	8
CAX50352.1_1360	69	0	0	0	0	8.69565	1.44928	0.101449	6
CAX49596.1_604	277	1.08303	0.361011	0.0144404	3	7.58123	1.44404	0.0974729	21
CAX50992.1_2000	142	0	0	0	0	5.6338	1.40845	0.0774648	8
CAX50756.1_1764	72	0	0	0	0	5.55556	1.38889	0.0694444	4
CAX49810.1_818	73	0	0	0	0	12.3288	1.36986	0.136986	9
CAX50906.1_1914	225	0.888889	0	0.00888889	2	8.88889	1.33333	0.151111	20
CAX50734.1_1742	77	0	0	0	0	11.6883	1.2987	0.12987	9
CAX49833.1_841	156	1.28205	0	0.0128205	2	7.05128	1.28205	0.102564	11
CAX49247.1_255	80	2.5	1.25	0.05	2	5	1.25	0.075	4
CAX49848.1_856	82	0	0	0	0	7.31707	1.21951	0.097561	6
CAX50528.1_1536	252	1.19048	0	0.015873	3	14.6825	1.19048	0.166667	37
CAX50960.1_1968	358	0.27933	0	0.00558659	1	15.6425	1.11732	0.178771	56
CAX50342.1_1350	92	0	0	0	0	7.6087	1.08696	0.108696	7
CAX50246.1_1254	1865	0.0536193	0	0.000536193	1	16.8365	1.07239	0.192493	314
CAX49947.1_955	97	1.03093	1.03093	0.0206186	1	6.18557	1.03093	0.0824742	6
CAX49582.1_590	301	0.332226	0	0.00332226	1	6.64452	0.996678	0.0797342	20
CAX51112.1_2120	1114	0.628366	0.0897666	0.0116697	7	9.78456	0.987433	0.137343	109
CAX49381.1_389	109	0	0	0	0	2.75229	0.917431	0.0366972	3
CAX50241.1_1249	1622	0.431566	0	0.00431566	7	7.89149	0.863132	0.0961776	128
CAX49112.1_120	1699	0.176574	0.0588582	0.00235433	3	4.59094	0.824014	0.0618011	78
CAX50949.1_1957	126	0.793651	0	0.00793651	1	6.34921	0.793651	0.0873016	8
CAX49041.1_49	264	0.378788	0	0.00378788	1	5.30303	0.757576	0.0719697	14
CAX49726.1_734	541	0.739372	0	0.00739372	4	9.42699	0.739372	0.112754	51
CAX50903.1_1911	136	0	0	0	0	8.08824	0.735294	0.102941	11
CAX49873.1_881	144	0	0	0	0	6.25	0.694444	0.0763889	9
CAX50338.1_1346	584	0.342466	0	0.00342466	2	4.96575	0.684932	0.0650685	29
CAX50440.1_1448	1470	0.612245	0	0.00612245	9	9.79592	0.680272	0.129932	144
CAX49310.1_318	303	0.660066	0	0.00660066	2	7.26073	0.660066	0.0924092	22
CAX49319.1_327	3363	0.535236	0.0297354	0.00624442	18	7.93934	0.654178	0.107642	267
CAX49409.1_417	1381	1.08617	0.144823	0.0137581	15	9.6307	0.651702	0.131064	133
CAX50075.1_1083	314	0.318471	0	0.00318471	1	7.96178	0.636943	0.089172	25
CAX51113.1_2121	2796	0.46495	0.107296	0.00751073	13	8.2618	0.608011	0.108369	231
CAX49405.1_413	1813	0.496415	0	0.00606729	9	7.44622	0.606729	0.10866	135
CAX49658.1_666	2031	0.886263	0	0.0108321	18	6.40079	0.590842	0.0886263	130
CAX49159.1_167	175	0.571429	0	0.00571429	1	13.7143	0.571429	0.171429	24
CAX51035.1_2043	175	0	0	0	0	2.28571	0.571429	0.0285714	4
CAX50642.1_1650	530	0.188679	0	0.00377358	1	7.73585	0.566038	0.0924528	41
CAX49045.1_53	531	0	0	0	0	3.9548	0.564972	0.0621469	21
CAX50165.1_1173	357	0.560224	0	0.00560224	2	7.56303	0.560224	0.103641	27
CAX50379.1_1387	2142	0.326797	0	0.00326797	7	8.54342	0.560224	0.123249	183
CAX49410.1_418	1644	0.790754	0.121655	0.00973236	13	9.12409	0.547445	0.129562	150
CAX49793.1_801	551	0.725953	0	0.00907441	4	6.89655	0.544465	0.0816697	38
CAX49066.1_74	554	0	0	0	0	4.33213	0.541516	0.0649819	24
CAX50671.1_1679	4095	0.537241	0.02442	0.00683761	22	7.57021	0.537241	0.0998779	310
CAX50261.1_1269	4478	0.446628	0.0446628	0.00625279	20	6.61009	0.535954	0.0832961	296
CAX50935.1_1943	1314	0.456621	0.0761035	0.00608828	6	5.78387	0.532725	0.0768645	76
CAX49406.1_414	961	1.04058	0	0.012487	10	8.42872	0.520291	0.110302	81
CAX49776.1_784	962	0.623701	0	0.00623701	6	5.92516	0.519751	0.0841996	57
CAX50169.1_1177	975	0.923077	0.102564	0.0133333	9	5.64103	0.512821	0.0748718	55
CAX50345.1_1353	782	0.255754	0	0.00255754	2	6.13811	0.511509	0.0792839	48
CAX51090.1_2098	1173	0.170503	0	0.00170503	2	8.01364	0.511509	0.0980392	94
CAX49399.1_407	587	0	0	0	0	9.02896	0.511073	0.102215	53
CAX49859.1_867	197	0.507614	0	0.00507614	1	6.09137	0.507614	0.0761421	12
CAX49123.1_131	2964	0	0	0	0	3.64372	0.506073	0.0448718	108
CAX50983.1_1991	596	1.67785	0	0.0201342	10	6.54362	0.503356	0.0956376	39
CAX49404.1_412	201	0.995025	0	0.0199005	2	3.48259	0.497512	0.0646766	7
CAX49708.1_716	2819	0.212841	0	0.00248315	6	7.69777	0.49663	0.101809	217
CAX49114.1_122	2016	0.297619	0	0.00347222	6	5.55556	0.496032	0.0744048	112
CAX50460.1_1468	407	0.737101	0.2457	0.014742	3	3.6855	0.4914	0.04914	15
CAX49772.1_780	1661	0.301023	0	0.00421433	5	7.34497	0.481638	0.0969296	122
CAX50590.1_1598	3949	0.0759686	0	0.000759686	3	8.28058	0.481134	0.10585	327
CAX50216.1_1224	422	0.236967	0	0.00236967	1	9.24171	0.473934	0.109005	39
CAX49200.1_208	1903	0.0525486	0	0.000525486	1	5.20231	0.472937	0.0688387	99
CAX50612.1_1620	1696	0.471698	0	0.00648585	8	6.66274	0.471698	0.0854953	113
CAX51001.1_2009	4903	0.448705	0.0407914	0.00530288	22	6.85295	0.469101	0.0907608	336
CAX49957.1_965	2560	0.15625	0.078125	0.00273437	4	5.97656	0.46875	0.084375	153
CAX50093.1_1101	4290	0.13986	0	0.0013986	6	6.13054	0.4662	0.0752914	263
CAX49784.1_792	864	0.347222	0.115741	0.00578704	3	6.59722	0.462963	0.0775463	57
CAX50513.1_1521	4992	0.220353	0	0.00240385	11	8.61378	0.460737	0.108574	430
CAX49826.1_834	5675	0.264317	0	0.00334802	15	7.40088	0.45815	0.0977974	420
CAX50343.1_1351	1542	0.259403	0	0.00259403	4	9.14397	0.453956	0.109598	141
CAX50257.1_1265	447	0.894855	0	0.0111857	4	7.38255	0.447427	0.0850112	33
CAX50287.1_1295	448	1.11607	0.223214	0.0133929	5	4.91071	0.446429	0.0625	22
CAX49270.1_278	2029	0.443568	0	0.00492854	9	7.19566	0.443568	0.0892065	146
CAX50581.1_1589	677	0.443131	0.14771	0.00738552	3	7.97637	0.443131	0.107829	54
CAX49668.1_676	453	0.220751	0	0.00220751	1	2.86976	0.441501	0.0419426	13
CAX49740.1_748	908	0.330396	0	0.00440529	3	4.40529	0.440529	0.0605727	40
CAX50617.1_1625	228	0	0	0	0	4.38596	0.438596	0.0570175	10
CAX49588.1_596	1830	0.273224	0	0.00327869	5	5.68306	0.437158	0.0693989	104
CAX50825.1_1833	230	0.869565	0.434783	0.0173913	2	4.34783	0.434783	0.0521739	10
CAX50046.1_1054	8515	0.187904	0	0.00223136	16	8.0916	0.434527	0.0975925	689
CAX49652.1_660	2594	0.269854	0	0.00308404	7	7.90285	0.424056	0.103315	205
CAX50480.1_1488	236	0	0	0	0	4.66102	0.423729	0.0635593	11
CAX50888.1_1896	4956	0.443906	0.0605327	0.00625504	22	6.84019	0.423729	0.0928168	339
CAX50492.1_1500	1655	0.181269	0	0.00362538	3	7.00906	0.422961	0.0918429	116
CAX49369.1_377	1903	0.105097	0.0525486	0.00157646	2	5.30741	0.420389	0.0641093	101
CAX49180.1_188	239	0	0	0	0	5.02092	0.41841	0.0627615	12
CAX51050.1_2058	239	0	0	0	0	10.0418	0.41841	0.108787	24
CAX50010.1_1018	1685	0.652819	0	0.00712166	11	6.94362	0.41543	0.0878338	117
CAX49942.1_950	482	0.207469	0	0.00207469	1	6.22407	0.414938	0.0705394	30
CAX50800.1_1808	241	0	0	0	0	2.90456	0.414938	0.0373444	7
CAX49187.1_195	975	0.307692	0	0.00410256	3	9.12821	0.410256	0.0984615	89
CAX49792.1_800	2706	0.517369	0	0.00628234	14	5.46933	0.406504	0.0698448	148
CAX50008.1_1016	740	0	0	0	0	5.81081	0.405405	0.0662162	43
CAX50802.1_1810	4442	0.0675371	0	0.000675371	3	5.448	0.405223	0.0675371	242
CAX49154.1_162	1742	0.229621	0	0.00229621	4	6.31458	0.401837	0.0786452	110
CAX50865.1_1873	1005	0.0995025	0	0.00199005	1	6.36816	0.39801	0.078607	64
CAX49976.1_984	8558	0.16359	0.0233699	0.00233699	14	5.57373	0.397289	0.0737322	477
CAX49954.1_962	2772	0.108225	0	0.001443	3	5.77201	0.396825	0.0764791	160
CAX50454.1_1462	1782	0.16835	0	0.0016835	3	5.33109	0.392817	0.0622896	95
CAX50244.1_1252	765	0	0	0	0	5.62092	0.392157	0.0653595	43
CAX50927.1_1935	255	0	0	0	0	3.52941	0.392157	0.0431373	9
CAX49590.1_598	517	0.193424	0.193424	0.00386847	1	6.38298	0.386847	0.0793037	33
CAX49951.1_959	1551	0.644745	0	0.0141844	10	8.57511	0.386847	0.116054	133
CAX50432.1_1440	793	0.75662	0	0.00882724	6	7.314	0.37831	0.0907945	58
CAX50096.1_1104	1059	0.661001	0.0944287	0.00944287	7	5.28801	0.377715	0.0764873	56
CAX49122.1_130	2144	0.326493	0	0.00326493	7	4.99067	0.373134	0.0629664	107
CAX50538.1_1546	536	0.186567	0	0.00186567	1	11.9403	0.373134	0.160448	64
CAX49587.1_595	537	0	0	0	0	4.28305	0.372439	0.0577281	23
CAX50014.1_1022	4574	0.480979	0.0218627	0.00546568	22	6.55881	0.371666	0.0883253	300
CAX50491.1_1499	1889	0.211752	0	0.0026469	4	7.5172	0.370566	0.0905241	142
CAX49767.1_775	276	0	0	0	0	4.34783	0.362319	0.0615942	12
CAX49941.1_949	1400	0.142857	0	0.00142857	2	4.5	0.357143	0.0607143	63
CAX49191.1_199	842	0.118765	0	0.00118765	1	4.15677	0.356295	0.0510689	35
CAX50592.1_1600	2000	0.2	0.05	0.004	4	5.6	0.35	0.071	112
CAX51031.1_2039	572	0	0	0	0	8.04196	0.34965	0.113636	46
CAX49979.1_987	2291	0	0	0	0	4.23396	0.349192	0.0515059	97
CAX50023.1_1031	575	0.695652	0	0.00695652	4	5.73913	0.347826	0.0678261	33
CAX49938.1_946	2588	0.347759	0	0.00425039	9	5.5255	0.347759	0.0683926	143
CAX50077.1_1085	289	0.346021	0	0.00346021	1	4.15225	0.346021	0.0484429	12
CAX49047.1_55	3479	0.344927	0	0.0051739	12	5.92124	0.344927	0.0813452	206
CAX49064.1_72	3479	0.344927	0	0.0051739	12	5.92124	0.344927	0.0813452	206
CAX50666.1_1674	290	1.03448	0	0.0103448	3	8.96552	0.344828	0.110345	26
CAX49819.1_827	10165	0.137727	0.0196754	0.00186916	14	7.20118	0.344319	0.0875553	732
CAX49960.1_968	1167	0.17138	0	0.0017138	2	4.62725	0.342759	0.0651243	54
CAX49566.1_574	6590	0.16692	0	0.00227618	11	5.73596	0.333839	0.0720789	378
CAX49136.1_144	2101	0.0475964	0.0475964	0.000951928	1	5.85436	0.333175	0.0704426	123
CAX50413.1_1421	3322	0.331126	0.0602047	0.00421433	11	7.7363	0.331126	0.0993377	257
CAX50097.1_1105	608	0.493421	0	0.00493421	3	6.57895	0.328947	0.0805921	40
CAX50490.1_1498	608	0.493421	0.164474	0.0115132	3	4.27632	0.328947	0.0641447	26
CAX49790.1_798	611	0.163666	0.163666	0.00654664	1	4.90998	0.327332	0.0703764	30
CAX49907.1_915	611	0.818331	0	0.00981997	5	4.41899	0.327332	0.0638298	27
CAX49807.1_815	2142	0.280112	0	0.00373483	6	5.83567	0.326797	0.073296	125
CAX50036.1_1044	615	0.325203	0.162602	0.00487805	2	5.36585	0.325203	0.0634146	33
CAX49548.1_556	1236	0.242718	0	0.00242718	3	7.03883	0.323625	0.0825243	87
CAX49113.1_121	4387	0.0683839	0	0.000683839	3	5.31115	0.319125	0.0649647	233
CAX50021.1_1029	944	0.105932	0	0.00105932	1	4.97881	0.317797	0.0603814	47
CAX50339.1_1347	1261	0.158604	0	0.00158604	2	4.36162	0.317209	0.0618557	55
CAX50934.1_1942	6313	0.142563	0.0316807	0.00253445	9	5.43323	0.316807	0.068747	343
CAX49059.1_67	2219	0.360523	0.0450653	0.00495719	8	6.48941	0.315457	0.0874268	144
CAX49735.1_743	634	0.630915	0	0.00630915	4	6.15142	0.315457	0.0772871	39
CAX49959.1_967	640	0.15625	0	0.0015625	1	4.84375	0.3125	0.059375	31
CAX50082.1_1090	2562	0.429352	0.039032	0.00663544	11	7.61124	0.312256	0.087822	195
CAX49547.1_555	2283	0.21901	0	0.00350416	5	8.10337	0.306614	0.0954884	185
CAX50017.1_1025	664	0.150602	0	0.00150602	1	5.27108	0.301205	0.0662651	35
CAX50348.1_1356	1996	0	0	0	0	4.30862	0.300601	0.0546092	86
CAX50750.1_1758	4332	0.0923361	0.023084	0.0011542	4	4.10896	0.300092	0.0517082	178
CAX50012.1_1020	1678	0.715137	0	0.00774732	12	5.54231	0.297974	0.0661502	93
CAX49592.1_600	2704	0.369822	0	0.00443787	10	5.25148	0.295858	0.0658284	142
CAX50660.1_1668	1356	0	0	0	0	4.64602	0.294985	0.0567847	63
CAX50304.1_1312	3735	0.0535475	0	0.000535475	2	5.51539	0.294511	0.0639893	206
CAX50455.1_1463	681	1.0279	0	0.0117474	7	5.43319	0.293686	0.0704846	37
CAX49931.1_939	2748	0.14556	0.0727802	0.00400291	4	6.47744	0.291121	0.0811499	178
CAX51053.1_2061	1033	0.774443	0	0.00871249	8	6.09874	0.290416	0.0755082	63
CAX50530.1_1538	692	0.433526	0	0.00433526	3	7.36994	0.289017	0.0881503	51
CAX50070.1_1078	697	0	0	0	0	4.16069	0.286944	0.0559541	29
CAX50522.1_1530	697	0	0	0	0	4.87805	0.286944	0.061693	34
CAX50824.1_1832	2092	0.478011	0	0.0100382	10	4.82792	0.286807	0.0645315	101
CAX50283.1_1291	1052	0.380228	0.095057	0.00665399	4	5.70342	0.285171	0.0722433	60
CAX50827.1_1835	1756	0.22779	0	0.00284738	4	5.58087	0.284738	0.0671982	98
CAX50446.1_1454	3867	0.206879	0	0.00258598	8	5.84432	0.284458	0.0739591	226
CAX49293.1_301	1413	0.283086	0	0.00283086	4	5.80326	0.283086	0.0707714	82
CAX50890.1_1898	7085	0.0564573	0	0.000564573	4	5.05293	0.282287	0.0633733	358
CAX49761.1_769	1429	0.279916	0	0.00349895	4	4.47866	0.279916	0.0524843	64
CAX49196.1_204	723	1.24481	0	0.0124481	9	4.426	0.276625	0.0525588	32
CAX50870.1_1878	362	0.828729	0	0.0110497	3	6.90608	0.276243	0.0801105	25
CAX50489.1_1497	2910	0.446735	0.0343643	0.00721649	13	6.94158	0.274914	0.0979381	202
CAX50187.1_1195	4452	0.224618	0.0224618	0.00426774	10	5.86253	0.269542	0.0815364	261
CAX49446.1_454	374	0	0	0	0	2.13904	0.26738	0.026738	8
CAX50393.1_1401	751	0.133156	0	0.00133156	1	7.45672	0.266312	0.081225	56
CAX49229.1_237	2640	0.0757576	0	0.00113636	2	5.45455	0.265152	0.0674242	144
CAX50493.1_1501	1133	0.441306	0	0.00441306	5	5.29568	0.264784	0.0617829	60
CAX50416.1_1424	1139	0.175593	0	0.00263389	2	5.53117	0.263389	0.0640913	63
CAX50375.1_1383	380	0.526316	0.263158	0.0105263	2	3.68421	0.263158	0.0473684	14
CAX49019.1_27	381	0.524934	0	0.00787402	2	6.29921	0.262467	0.0944882	24
CAX49806.1_814	2701	0.0370233	0	0.000370233	1	4.70196	0.259163	0.0636801	127
CAX51060.1_2068	786	0.636132	0	0.00763359	5	5.97964	0.254453	0.0776081	47
CAX49306.1_314	1186	0.337268	0	0.00337268	4	5.31197	0.252951	0.0649241	63
CAX49710.1_718	1987	0.301963	0.0503271	0.0035229	6	4.78108	0.251636	0.0588827	95
CAX51017.1_2025	1216	0.0822368	0	0.000822368	1	4.35855	0.246711	0.0550987	53
CAX49003.1_11	1218	0.164204	0	0.00164204	2	6.48604	0.246305	0.0763547	79
CAX49118.1_126	2874	0.0695894	0	0.00104384	2	4.10578	0.243563	0.0535839	118
CAX49629.1_637	822	0.243309	0	0.00243309	2	7.05596	0.243309	0.080292	58
CAX49939.1_947	1242	0.241546	0	0.00241546	3	5.95813	0.241546	0.0764895	74
CAX49709.1_717	1658	0	0	0	0	4.76478	0.241255	0.0542823	79
CAX49899.1_907	1244	0.160772	0	0.00160772	2	5.06431	0.241158	0.0635048	63
CAX49109.1_117	1684	0.771971	0.118765	0.0112827	13	5.87886	0.23753	0.0825416	99
CAX49303.1_311	1275	0	0	0	0	2.58824	0.235294	0.0305882	33
CAX50594.1_1602	425	0	0	0	0	2.11765	0.235294	0.0235294	9
CAX50815.1_1823	3829	0.182815	0	0.00208932	7	6.13737	0.235048	0.0754766	235
CAX50957.1_1965	4275	0.187135	0	0.00233918	8	5.49708	0.233918	0.0701754	235
CAX50114.1_1122	445	0.674157	0	0.00674157	3	8.98876	0.224719	0.114607	40
CAX49156.1_164	2233	0.223914	0	0.00403045	5	5.41872	0.223914	0.0626959	121
CAX50874.1_1882	2242	0.490633	0	0.00669045	11	7.22569	0.223015	0.0851918	162
CAX49048.1_56	449	0.445434	0	0.00890869	2	4.67706	0.222717	0.0824053	21
CAX49924.1_932	451	0	0	0	0	4.87805	0.221729	0.0532151	22
CAX50693.1_1701	3159	0.379867	0	0.00506489	12	6.80595	0.221589	0.0861032	215
CAX50602.1_1610	2269	0.220361	0	0.00264434	5	5.55311	0.220361	0.0639048	126
CAX50629.1_1637	910	0.43956	0	0.00549451	4	8.57143	0.21978	0.108791	78
CAX49834.1_842	1366	0.292826	0	0.00366032	4	6.66179	0.219619	0.0775988	91
CAX50433.1_1441	2292	0.34904	0	0.0039267	8	5.41012	0.21815	0.0658813	124
CAX50002.1_1010	2318	0.560828	0	0.0069025	13	6.25539	0.215703	0.0776531	145
CAX49394.1_402	464	0	0	0	0	6.68103	0.215517	0.075431	31
CAX50516.1_1524	2842	0.0351865	0	0.000351865	1	5.06685	0.211119	0.0584096	144
CAX49690.1_698	955	0.314136	0	0.00418848	3	6.80628	0.209424	0.0764398	65
CAX50632.1_1640	3398	0.117716	0	0.00117716	4	5.35609	0.206004	0.0679812	182
CAX49923.1_931	1948	0.308008	0	0.00359343	6	4.82546	0.205339	0.0590349	94
CAX49240.1_248	1476	0.0677507	0	0.000677507	1	5.55556	0.203252	0.0650407	82
CAX49208.1_216	2470	0.0809717	0	0.00121457	2	6.11336	0.202429	0.0724696	151
CAX49838.1_846	494	0.809717	0	0.00809717	4	4.65587	0.202429	0.0526316	23
CAX50076.1_1084	1992	0.150602	0	0.00150602	3	4.66867	0.200803	0.0557229	93
CAX50687.1_1695	499	0.400802	0	0.00400802	2	4.00802	0.200401	0.0480962	20
CAX50439.1_1447	1502	0.332889	0.0665779	0.00599201	5	4.99334	0.199734	0.0685752	75
CAX50462.1_1470	1007	0.297915	0.0993049	0.00595829	3	6.25621	0.19861	0.0794439	63
CAX50668.1_1676	2018	0.198216	0.049554	0.00346878	4	5.99604	0.198216	0.0723489	121
CAX49950.1_958	6606	0.0756888	0.0151378	0.0013624	5	5.19225	0.196791	0.0610051	343
CAX50875.1_1883	2065	0.193705	0	0.00290557	4	5.47215	0.193705	0.0624697	113
CAX50269.1_1277	521	1.34357	0.191939	0.0153551	7	4.9904	0.191939	0.059501	26
CAX50444.1_1452	521	0.767754	0	0.00959693	4	5.75816	0.191939	0.0671785	30
CAX49207.1_215	1043	0.191755	0	0.00287632	2	7.76606	0.191755	0.0977948	81
CAX49046.1_54	7334	0.245432	0.0136351	0.00286338	18	5.14044	0.190892	0.0650395	377
CAX49065.1_73	7334	0.245432	0.0136351	0.00286338	18	5.14044	0.190892	0.0650395	377
CAX50029.1_1037	1053	0.474834	0	0.00569801	5	6.93257	0.189934	0.0816714	73
CAX50533.1_1541	1586	0.0630517	0	0.000630517	1	4.41362	0.189155	0.0498108	70
CAX49728.1_736	2172	0.276243	0.0460405	0.00322284	6	4.78821	0.184162	0.0566298	104
CAX49238.1_246	1630	0.122699	0.0613497	0.00184049	2	5.09202	0.184049	0.0601227	83
CAX49324.1_332	1631	0.367872	0	0.00490497	6	4.16922	0.183936	0.0533415	68
CAX49882.1_890	1631	0.429185	0	0.00490497	7	4.16922	0.183936	0.0490497	68
CAX50796.1_1804	2187	0.365798	0	0.00411523	8	6.40146	0.182899	0.0786465	140
CAX50425.1_1433	555	0	0	0	0	5.04505	0.18018	0.0558559	28
CAX50275.1_1283	556	0.179856	0	0.00179856	1	3.95683	0.179856	0.0467626	22
CAX50771.1_1779	557	0.359066	0	0.00359066	2	4.3088	0.179533	0.059246	24
CAX50819.1_1827	559	0	0	0	0	3.9356	0.178891	0.0447227	22
CAX49263.1_271	562	0.177936	0	0.00355872	1	5.51601	0.177936	0.0658363	31
CAX51062.1_2070	566	0.353357	0	0.00353357	2	4.77032	0.176678	0.0600707	27
CAX49037.1_45	1702	0.235018	0	0.00235018	4	5.64042	0.176263	0.06698	96
CAX50860.1_1868	1703	0.17616	0	0.0017616	3	2.87728	0.17616	0.0340575	49
CAX50084.1_1092	1706	0.17585	0	0.00234467	3	5.2755	0.17585	0.059789	90
CAX50467.1_1475	1714	0.0583431	0	0.000583431	1	5.07585	0.175029	0.0577596	87
CAX49121.1_129	5183	0.0385877	0	0.000385877	2	3.29925	0.173645	0.0393594	171
CAX50449.1_1457	2314	0	0	0	0	5.27226	0.172861	0.0592048	122
CAX49868.1_876	579	0.690846	0	0.00863558	4	6.04491	0.172712	0.08981	35
CAX49309.1_317	4086	0.244738	0	0.00342633	10	5.58003	0.171317	0.0680372	228
CAX50832.1_1840	586	0.170648	0	0.00170648	1	7.33788	0.170648	0.0870307	43
CAX49379.1_387	587	0	0	0	0	3.2368	0.170358	0.0477002	19
CAX50858.1_1866	2951	0.237208	0.0338868	0.00440529	7	4.77804	0.169434	0.0569299	141
CAX49172.1_180	592	0.168919	0	0.00168919	1	4.89865	0.168919	0.0658784	29
CAX50270.1_1278	592	0.675676	0	0.00675676	4	6.25	0.168919	0.0709459	37
CAX49440.1_448	597	0.167504	0	0.00167504	1	6.36516	0.167504	0.0703518	38
CAX50423.1_1431	1194	0.0837521	0	0.000837521	1	4.85762	0.167504	0.0577889	58
CAX49152.1_160	1202	0.0831947	0	0.000831947	1	4.32612	0.166389	0.0515807	52
CAX50541.1_1549	3052	0.294889	0	0.00327654	9	6.19266	0.163827	0.0763434	189
CAX49143.1_151	1227	0.0814996	0	0.000814996	1	6.35697	0.162999	0.0709046	78
CAX49142.1_150	618	0	0	0	0	4.53074	0.161812	0.0517799	28
CAX51016.1_2024	1868	0.0535332	0	0.000535332	1	4.12206	0.1606	0.0497859	77
CAX50045.1_1053	2491	0.481734	0	0.00642312	12	5.82096	0.160578	0.0702529	145
CAX50603.1_1611	4996	0.120096	0	0.00140112	6	4.72378	0.160128	0.0618495	236
CAX50803.1_1811	1253	0	0	0	0	3.19234	0.159617	0.0343176	40
CAX49953.1_961	627	0.318979	0	0.00318979	2	3.66826	0.15949	0.0398724	23
CAX50661.1_1669	1268	0	0	0	0	4.49527	0.157729	0.0567823	57
CAX49589.1_597	641	0.156006	0	0.00156006	1	4.21217	0.156006	0.0452418	27
CAX50331.1_1339	1923	0.364015	0	0.00416017	7	5.51222	0.156006	0.0634425	106
CAX50258.1_1266	2574	0.34965	0	0.00543901	9	6.13831	0.1554	0.0734266	158
CAX49307.1_315	1290	0.232558	0	0.00232558	3	5.96899	0.155039	0.072093	77
CAX50659.1_1667	1301	0	0	0	0	4.15065	0.153728	0.0499616	54
CAX50281.1_1289	651	0	0	0	0	3.99386	0.15361	0.0445469	26
CAX51038.1_2046	1954	0.307062	0	0.00307062	6	5.47595	0.153531	0.0614125	107
CAX50279.1_1287	653	0.153139	0.153139	0.00306279	1	2.14395	0.153139	0.0275651	14
CAX49443.1_451	1311	0.152555	0	0.00152555	2	4.95805	0.152555	0.0533944	65
CAX50049.1_1057	1322	0.151286	0	0.00226929	2	3.70651	0.151286	0.0400908	49
CAX49178.1_186	2738	0	0	0	0	3.39664	0.146092	0.0398101	93
CAX50582.1_1590	1374	0.0727802	0	0.000727802	1	5.38574	0.14556	0.0596798	74
CAX50850.1_1858	688	0.436047	0	0.00436047	3	5.52326	0.145349	0.0625	38
CAX50409.1_1417	692	0.867052	0	0.00867052	6	5.63584	0.144509	0.0679191	39
CAX50820.1_1828	2768	0.144509	0	0.00144509	4	6.61127	0.144509	0.0791185	183
CAX50391.1_1399	3465	0.0577201	0	0.000865801	2	4.81962	0.1443	0.0545455	167
CAX50266.1_1274	4188	0.262655	0	0.00310411	11	5.2531	0.143266	0.0678128	220
CAX49139.1_147	2842	0.0351865	0	0.000351865	1	6.54469	0.140746	0.0731879	186
CAX50058.1_1066	2895	0.172712	0	0.00172712	5	4.21416	0.138169	0.0497409	122
CAX49688.1_696	1451	0.206754	0	0.0034459	3	5.03101	0.137836	0.0606478	73
CAX49302.1_310	727	0.137552	0	0.00137552	1	4.5392	0.137552	0.0522696	33
CAX50811.1_1819	2192	0.228102	0	0.00273723	5	5.24635	0.136861	0.0606752	115
CAX49002.1_10	1466	0.47749	0	0.00613915	7	4.91132	0.136426	0.0613915	72
CAX49148.1_156	3863	0.103546	0	0.00129433	4	4.78902	0.129433	0.0548796	185
CAX49978.1_986	1546	0.0646831	0	0.000646831	1	3.62225	0.129366	0.0426908	56
CAX49892.1_900	4739	0.084406	0	0.00105507	4	5.10656	0.126609	0.0609833	242
CAX50274.1_1282	1584	0.0631313	0	0.000631313	1	3.40909	0.126263	0.0385101	54
CAX50905.1_1913	830	0.240964	0	0.00240964	2	4.33735	0.120482	0.0638554	36
CAX49722.1_730	838	0.357995	0	0.00596659	3	5.13126	0.119332	0.071599	43
CAX49254.1_262	854	0.468384	0	0.00702576	4	6.08899	0.117096	0.0679157	52
CAX51117.1_2125	858	0	0	0	0	2.7972	0.11655	0.030303	24
CAX49779.1_787	871	0.344432	0	0.00344432	3	7.34788	0.114811	0.0895522	64
CAX49096.1_104	904	0.110619	0	0.00110619	1	5.19912	0.110619	0.0630531	47
CAX49340.1_348	1837	0.272183	0	0.00381056	5	7.34894	0.108873	0.0827436	135
CAX49706.1_714	943	0.212089	0	0.00212089	2	3.60551	0.106045	0.0424178	34
CAX49343.1_351	1897	0.158144	0	0.00158144	3	5.74591	0.10543	0.0664207	109
CAX49971.1_979	951	0	0	0	0	2.2082	0.105152	0.0241851	21
CAX49565.1_573	2858	0.209937	0	0.00209937	6	4.54864	0.104969	0.0514346	130
CAX50549.1_1557	958	0.313152	0	0.00417537	3	5.21921	0.104384	0.0584551	50
CAX50399.1_1407	1995	0.100251	0	0.00100251	2	4.86216	0.100251	0.0541353	97
CAX50657.1_1665	1020	0	0	0	0	3.33333	0.0980392	0.0362745	34
CAX49153.1_161	1032	0	0	0	0	3.39147	0.0968992	0.0387597	35
CAX49151.1_159	3107	0.0965562	0	0.000965562	3	5.2784	0.0965562	0.0650145	164
CAX49921.1_929	1037	0.289296	0	0.00289296	3	3.76085	0.096432	0.0433944	39
CAX49586.1_594	2087	0.479157	0	0.00574988	10	5.07906	0.0958313	0.0608529	106
CAX49286.1_294	2096	0.0954198	0	0.000954198	2	6.53626	0.0954198	0.0782443	137
CAX50102.1_1110	2109	0.237079	0	0.00331911	5	5.54765	0.0948317	0.0625889	117
CAX49025.1_33	2111	0.142113	0	0.00189484	3	4.35812	0.0947418	0.0502132	92
CAX49110.1_118	5410	0.0924214	0	0.000924214	5	3.49353	0.0924214	0.0410351	189
CAX49124.1_132	5410	0.0924214	0	0.000924214	5	3.49353	0.0924214	0.0410351	189
CAX51109.1_2117	2164	0.369686	0	0.00369686	8	5.03697	0.0924214	0.0600739	109
CAX49578.1_586	2185	0.1373	0	0.001373	3	5.81236	0.0915332	0.0677346	127
CAX49673.1_681	1120	0.625	0.0892857	0.00892857	7	4.01786	0.0892857	0.0526786	45
CAX49141.1_149	1124	0	0	0	0	4.89324	0.088968	0.0542705	55
CAX50272.1_1280	3448	0.0580046	0	0.00087007	2	4.69838	0.087007	0.0574246	162
CAX51036.1_2044	1153	0.260191	0	0.00260191	3	5.03036	0.0867303	0.0607112	58
CAX50038.1_1046	1166	0.428816	0	0.00600343	5	7.11835	0.0857633	0.0883362	83
CAX50589.1_1597	1174	0.255537	0	0.00255537	3	6.13288	0.0851789	0.0741056	72
CAX49134.1_142	2491	0	0	0	0	6.26255	0.080289	0.0698515	156
CAX49412.1_420	1265	0.158103	0	0.00237154	2	4.74308	0.0790514	0.0537549	60
CAX51094.1_2102	1271	0	0	0	0	3.46184	0.0786782	0.0369788	44
CAX49116.1_124	2591	0.0385951	0	0.000385951	1	3.28059	0.0771903	0.0358935	85
CAX49886.1_894	1325	0.150943	0	0.00150943	2	6.64151	0.0754717	0.074717	88
CAX50106.1_1114	1394	0.286944	0	0.0035868	4	3.29986	0.071736	0.035868	46
CAX49231.1_239	1404	0	0	0	0	3.91738	0.0712251	0.045584	55
CAX49791.1_799	2814	0.10661	0	0.0010661	3	5.65032	0.0710732	0.0653873	159
CAX50484.1_1492	1476	0.203252	0	0.00338753	3	5.69106	0.0677507	0.0657182	84
CAX49622.1_630	1539	0	0	0	0	3.44379	0.0649773	0.0376868	53
CAX50059.1_1067	1547	0.0646412	0	0.000646412	1	3.23206	0.0646412	0.0355527	50
CAX49117.1_125	1647	0.121433	0	0.00121433	2	4.25015	0.0607165	0.0491803	70
CAX49884.1_892	1765	0.566572	0	0.00623229	10	4.98584	0.0566572	0.0594901	88
CAX50892.1_1900	1786	0.223964	0	0.00223964	4	3.80739	0.055991	0.0442329	68
CAX49362.1_370	2009	0.348432	0	0.00398208	7	5.22648	0.049776	0.0642111	105
CAX49137.1_145	4841	0	0	0	0	4.33795	0.0206569	0.0475108	210
CAX48995.1_3	43	2.32558	0	0.0232558	1	9.30233	0	0.139535	4
CAX48997.1_5	9	0	0	0	0	0	0	0	0
CAX48999.1_7	42	2.38095	0	0.0238095	1	7.14286	0	0.0952381	3
CAX49001.1_9	7	0	0	0	0	0	0	0	0
CAX49004.1_12	13	0	0	0	0	0	0	0	0
CAX49007.1_15	487	0	0	0	0	3.90144	0	0.0410678	19
CAX49008.1_16	32	0	0	0	0	6.25	0	0.09375	2
CAX49015.1_23	686	0	0	0	0	4.22741	0	0.048105	29
CAX49016.1_24	109	0	0	0	0	1.83486	0	0.0183486	2
CAX49018.1_26	106	2.83019	0	0.0283019	3	2.83019	0	0.0283019	3
CAX49022.1_30	6	0	0	0	0	0	0	0	0
CAX49023.1_31	143	0	0	0	0	2.0979	0	0.020979	3
CAX49026.1_34	23	0	0	0	0	8.69565	0	0.0869565	2
CAX49030.1_38	15	0	0	0	0	40	0	0.466667	6
CAX49031.1_39	15	0	0	0	0	6.66667	0	0.0666667	1
CAX49032.1_40	92	1.08696	0	0.0108696	1	2.17391	0	0.0217391	2
CAX49043.1_51	52	0	0	0	0	3.84615	0	0.0576923	2
CAX49044.1_52	52	0	0	0	0	1.92308	0	0.0192308	1
CAX49052.1_60	240	0	0	0	0	1.66667	0	0.0166667	4
CAX49054.1_62	1	0	0	0	0	0	0	0	0
CAX49056.1_64	7	0	0	0	0	0	0	0	0
CAX49057.1_65	33	0	0	0	0	0	0	0	0
CAX49058.1_66	109	0.917431	0	0.00917431	1	5.50459	0	0.0550459	6
CAX49067.1_75	7	0	0	0	0	0	0	0	0
CAX49070.1_78	154	0	0	0	0	2.5974	0	0.025974	4
CAX49074.1_82	6	0	0	0	0	0	0	0	0
CAX49077.1_85	1	0	0	0	0	0	0	0	0
CAX49087.1_95	4	0	0	0	0	0	0	0	0
CAX49092.1_100	462	0	0	0	0	5.19481	0	0.0562771	24
CAX49093.1_101	1	0	0	0	0	0	0	0	0
CAX49097.1_105	26	0	0	0	0	0	0	0	0
CAX49101.1_109	5	0	0	0	0	0	0	0	0
CAX49104.1_112	164	0.609756	0	0.00609756	1	5.4878	0	0.0731707	9
CAX49115.1_123	170	0	0	0	0	2.94118	0	0.0470588	5
CAX49135.1_143	447	0	0	0	0	4.25056	0	0.0469799	19
CAX49138.1_146	95	0	0	0	0	10.5263	0	0.115789	10
CAX49140.1_148	430	0	0	0	0	5.34884	0	0.0604651	23
CAX49144.1_152	620	0	0	0	0	5.64516	0	0.0612903	35
CAX49145.1_153	607	0	0	0	0	3.62438	0	0.0411862	22
CAX49146.1_154	996	0	0	0	0	4.81928	0	0.0532129	48
CAX49147.1_155	99	0	0	0	0	2.0202	0	0.020202	2
CAX49149.1_157	1265	0	0	0	0	5.21739	0	0.0616601	66
CAX49150.1_158	1733	0.17311	0	0.00230814	3	5.77034	0	0.0663589	100
CAX49157.1_165	6	0	0	0	0	33.3333	0	0.333333	2
CAX49158.1_166	12	0	0	0	0	8.33333	0	0.0833333	1
CAX49161.1_169	4	0	0	0	0	25	0	0.25	1
CAX49162.1_170	143	0	0	0	0	4.8951	0	0.048951	7
CAX49163.1_171	52	0	0	0	0	1.92308	0	0.0192308	1
CAX49164.1_172	103	0	0	0	0	0.970874	0	0.00970874	1
CAX49169.1_177	147	1.36054	0	0.0204082	2	6.12245	0	0.0748299	9
CAX49171.1_179	191	0.52356	0	0.0052356	1	4.71204	0	0.0628272	9
CAX49175.1_183	7	0	0	0	0	0	0	0	0
CAX49176.1_184	431	0	0	0	0	8.12065	0	0.0904872	35
CAX49177.1_185	341	0	0	0	0	2.34604	0	0.0234604	8
CAX49179.1_187	62	0	0	0	0	1.6129	0	0.016129	1
CAX49182.1_190	14	0	0	0	0	0	0	0	0
CAX49183.1_191	15	0	0	0	0	6.66667	0	0.0666667	1
CAX49185.1_193	1	0	0	0	0	0	0	0	0
CAX49189.1_197	236	1.27119	0	0.0127119	3	6.35593	0	0.0720339	15
CAX49193.1_201	2	0	0	0	0	0	0	0	0
CAX49195.1_203	3	0	0	0	0	33.3333	0	0.333333	1
CAX49198.1_206	3	0	0	0	0	33.3333	0	0.333333	1
CAX49206.1_214	19	0	0	0	0	0	0	0	0
CAX49209.1_217	86	0	0	0	0	3.48837	0	0.0348837	3
CAX49217.1_225	370	0	0	0	0	2.7027	0	0.027027	10
CAX49218.1_226	19	0	0	0	0	0	0	0	0
CAX49219.1_227	3	0	0	0	0	0	0	0	0
CAX49220.1_228	17	0	0	0	0	0	0	0	0
CAX49221.1_229	14	0	0	0	0	7.14286	0	0.0714286	1
CAX49228.1_236	788	0	0	0	0	3.4264	0	0.035533	27
CAX49230.1_238	379	0	0	0	0	2.37467	0	0.0237467	9
CAX49232.1_240	276	0	0	0	0	1.44928	0	0.0181159	4
CAX49233.1_241	885	0	0	0	0	2.59887	0	0.0282486	23
CAX49236.1_244	273	0	0	0	0	2.9304	0	0.029304	8
CAX49241.1_249	160	0	0	0	0	0.625	0	0.0125	1
CAX49243.1_251	621	0.161031	0	0.00161031	1	3.22061	0	0.0354267	20
CAX49244.1_252	588	0	0	0	0	4.08163	0	0.047619	24
CAX49248.1_256	1	0	0	0	0	100	0	1	1
CAX49249.1_257	18	0	0	0	0	0	0	0	0
CAX49250.1_258	223	0	0	0	0	6.72646	0	0.0762332	15
CAX49251.1_259	46	0	0	0	0	8.69565	0	0.0869565	4
CAX49259.1_267	1	0	0	0	0	0	0	0	0
CAX49260.1_268	16	0	0	0	0	0	0	0	0
CAX49261.1_269	37	0	0	0	0	5.40541	0	0.0540541	2
CAX49265.1_273	15	0	0	0	0	13.3333	0	0.133333	2
CAX49269.1_277	21	4.7619	0	0.047619	1	9.52381	0	0.0952381	2
CAX49273.1_281	18	0	0	0	0	5.55556	0	0.111111	1
CAX49276.1_284	4	0	0	0	0	0	0	0	0
CAX49282.1_290	48	4.16667	0	0.0416667	2	14.5833	0	0.1875	7
CAX49283.1_291	31	0	0	0	0	0	0	0	0
CAX49289.1_297	1	0	0	0	0	0	0	0	0
CAX49290.1_298	38	0	0	0	0	2.63158	0	0.0263158	1
CAX49295.1_303	4	0	0	0	0	0	0	0	0
CAX49304.1_312	2	0	0	0	0	0	0	0	0
CAX49305.1_313	9	0	0	0	0	11.1111	0	0.222222	1
CAX49311.1_319	26	0	0	0	0	0	0	0	0
CAX49312.1_320	68	0	0	0	0	0	0	0	0
CAX49313.1_321	3	0	0	0	0	0	0	0	0
CAX49314.1_322	10	0	0	0	0	0	0	0	0
CAX49320.1_328	1148	0.261324	0	0.00348432	3	4.09408	0	0.0522648	47
CAX49321.1_329	3	0	0	0	0	0	0	0	0
CAX49327.1_335	5	0	0	0	0	0	0	0	0
CAX49331.1_339	5	0	0	0	0	0	0	0	0
CAX49332.1_340	117	0	0	0	0	5.98291	0	0.0683761	7
CAX49336.1_344	8	0	0	0	0	0	0	0	0
CAX49337.1_345	2	0	0	0	0	0	0	0	0
CAX49344.1_352	137	0	0	0	0	8.0292	0	0.0875912	11
CAX49353.1_361	1	0	0	0	0	0	0	0	0
CAX49355.1_363	52	0	0	0	0	9.61538	0	0.115385	5
CAX49356.1_364	22	0	0	0	0	0	0	0	0
CAX49358.1_366	22	0	0	0	0	0	0	0	0
CAX49361.1_369	2	0	0	0	0	0	0	0	0
CAX49363.1_371	129	0	0	0	0	3.10078	0	0.0310078	4
CAX49365.1_373	181	0	0	0	0	1.10497	0	0.0110497	2
CAX49366.1_374	81	0	0	0	0	0	0	0	0
CAX49368.1_376	7	0	0	0	0	0	0	0	0
CAX49370.1_378	2	0	0	0	0	0	0	0	0
CAX49371.1_379	8	0	0	0	0	0	0	0	0
CAX49380.1_388	25	0	0	0	0	4	0	0.04	1
CAX49387.1_395	161	0.621118	0	0.00621118	1	3.72671	0	0.0434783	6
CAX49390.1_398	1	0	0	0	0	0	0	0	0
CAX49393.1_401	1	0	0	0	0	100	0	2	1
CAX49400.1_408	16	0	0	0	0	0	0	0	0
CAX49403.1_411	9	0	0	0	0	11.1111	0	0.111111	1
CAX49407.1_415	2	0	0	0	0	0	0	0	0
CAX49408.1_416	1	0	0	0	0	0	0	0	0
CAX49417.1_425	1	0	0	0	0	0	0	0	0
CAX49425.1_433	377	0.265252	0	0.00265252	1	2.12202	0	0.0265252	8
CAX49427.1_435	2	0	0	0	0	0	0	0	0
CAX49428.1_436	2	0	0	0	0	0	0	0	0
CAX49432.1_440	1	0	0	0	0	0	0	0	0
CAX49434.1_442	2	0	0	0	0	0	0	0	0
CAX49435.1_443	72	0	0	0	0	9.72222	0	0.111111	7
CAX49436.1_444	43	0	0	0	0	4.65116	0	0.0465116	2
CAX49445.1_453	221	0	0	0	0	1.80995	0	0.0180995	4
CAX49447.1_455	166	0	0	0	0	3.61446	0	0.0421687	6
CAX49449.1_457	37	0	0	0	0	0	0	0	0
CAX49450.1_458	8	0	0	0	0	0	0	0	0
CAX49451.1_459	3	0	0	0	0	0	0	0	0
CAX49454.1_462	13	0	0	0	0	0	0	0	0
CAX49456.1_464	31	0	0	0	0	6.45161	0	0.0645161	2
CAX49471.1_479	13	0	0	0	0	7.69231	0	0.0769231	1
CAX49474.1_482	1	0	0	0	0	0	0	0	0
CAX49476.1_484	189	0	0	0	0	3.7037	0	0.042328	7
CAX49486.1_494	1	0	0	0	0	0	0	0	0
CAX49507.1_515	1	0	0	0	0	0	0	0	0
CAX49508.1_516	1	0	0	0	0	0	0	0	0
CAX49510.1_518	1	0	0	0	0	0	0	0	0
CAX49511.1_519	1	0	0	0	0	0	0	0	0
CAX49516.1_524	1	0	0	0	0	0	0	0	0
CAX49518.1_526	6	0	0	0	0	0	0	0	0
CAX49519.1_527	7	0	0	0	0	0	0	0	0
CAX49524.1_532	12	0	0	0	0	0	0	0	0
CAX49532.1_540	4	0	0	0	0	0	0	0	0
CAX49536.1_544	4	0	0	0	0	0	0	0	0
CAX49539.1_547	2	0	0	0	0	0	0	0	0
CAX49540.1_548	1	0	0	0	0	0	0	0	0
CAX49544.1_552	1	0	0	0	0	0	0	0	0
CAX49552.1_560	3	0	0	0	0	0	0	0	0
CAX49554.1_562	455	0	0	0	0	4.17582	0	0.043956	19
CAX49557.1_565	2	0	0	0	0	0	0	0	0
CAX49558.1_566	7	0	0	0	0	14.2857	0	0.142857	1
CAX49559.1_567	2	0	0	0	0	0	0	0	0
CAX49564.1_572	1	0	0	0	0	0	0	0	0
CAX49569.1_577	1	0	0	0	0	0	0	0	0
CAX49571.1_579	2	0	0	0	0	0	0	0	0
CAX49572.1_580	6	0	0	0	0	0	0	0	0
CAX49573.1_581	1	0	0	0	0	0	0	0	0
CAX49581.1_589	4	0	0	0	0	25	0	0.25	1
CAX49583.1_591	30	0	0	0	0	3.33333	0	0.0333333	1
CAX49591.1_599	10	0	0	0	0	30	0	0.3	3
CAX49593.1_601	10	0	0	0	0	10	0	0.3	1
CAX49594.1_602	98	0	0	0	0	4.08163	0	0.0408163	4
CAX49599.1_607	205	0	0	0	0	1.95122	0	0.0195122	4
CAX49603.1_611	4	0	0	0	0	25	0	0.25	1
CAX49605.1_613	1	0	0	0	0	0	0	0	0
CAX49607.1_615	5	0	0	0	0	0	0	0	0
CAX49609.1_617	394	0	0	0	0	6.09137	0	0.0634518	24
CAX49611.1_619	97	0	0	0	0	4.12371	0	0.0721649	4
CAX49613.1_621	173	0.578035	0	0.00578035	1	7.51445	0	0.0751445	13
CAX49619.1_627	108	0	0	0	0	4.62963	0	0.0462963	5
CAX49621.1_629	22	0	0	0	0	0	0	0	0
CAX49624.1_632	1	0	0	0	0	0	0	0	0
CAX49626.1_634	3	0	0	0	0	0	0	0	0
CAX49627.1_635	238	0.840336	0	0.00840336	2	6.72269	0	0.0840336	16
CAX49630.1_638	4	0	0	0	0	0	0	0	0
CAX49631.1_639	9	0	0	0	0	0	0	0	0
CAX49634.1_642	77	1.2987	0	0.012987	1	12.987	0	0.142857	10
CAX49635.1_643	24	0	0	0	0	20.8333	0	0.208333	5
CAX49636.1_644	18	0	0	0	0	33.3333	0	0.333333	6
CAX49638.1_646	1	0	0	0	0	100	0	1	1
CAX49647.1_655	1	0	0	0	0	0	0	0	0
CAX49649.1_657	2	0	0	0	0	0	0	0	0
CAX49650.1_658	6	0	0	0	0	0	0	0	0
CAX49654.1_662	50	0	0	0	0	2	0	0.02	1
CAX49663.1_671	11	0	0	0	0	0	0	0	0
CAX49667.1_675	22	0	0	0	0	9.09091	0	0.0909091	2
CAX49669.1_677	1	0	0	0	0	100	0	1	1
CAX49670.1_678	13	0	0	0	0	0	0	0	0
CAX49678.1_686	84	0	0	0	0	3.57143	0	0.0357143	3
CAX49680.1_688	170	1.17647	0	0.0117647	2	4.11765	0	0.0411765	7
CAX49681.1_689	60	0	0	0	0	1.66667	0	0.0166667	1
CAX49682.1_690	3	0	0	0	0	0	0	0	0
CAX49685.1_693	4	0	0	0	0	0	0	0	0
CAX49692.1_700	1	0	0	0	0	0	0	0	0
CAX49695.1_703	5	0	0	0	0	0	0	0	0
CAX49705.1_713	891	0.224467	0	0.00224467	2	5.94837	0	0.0695847	53
CAX49713.1_721	7	0	0	0	0	0	0	0	0
CAX49716.1_724	188	0	0	0	0	7.97872	0	0.0851064	15
CAX49718.1_726	4	0	0	0	0	0	0	0	0
CAX49723.1_731	78	0	0	0	0	6.41026	0	0.0641026	5
CAX49724.1_732	3	0	0	0	0	33.3333	0	0.333333	1
CAX49727.1_735	45	0	0	0	0	17.7778	0	0.177778	8
CAX49732.1_740	1	0	0	0	0	0	0	0	0
CAX49733.1_741	179	0.558659	0	0.00558659	1	5.02793	0	0.0614525	9
CAX49739.1_747	25	0	0	0	0	4	0	0.04	1
CAX49746.1_754	448	0	0	0	0	5.13393	0	0.0558036	23
CAX49751.1_759	43	0	0	0	0	11.6279	0	0.116279	5
CAX49752.1_760	18	0	0	0	0	0	0	0	0
CAX49755.1_763	2	0	0	0	0	0	0	0	0
CAX49757.1_765	48	0	0	0	0	4.16667	0	0.0416667	2
CAX49766.1_774	54	0	0	0	0	3.7037	0	0.037037	2
CAX49768.1_776	7	0	0	0	0	0	0	0	0
CAX49770.1_778	15	0	0	0	0	6.66667	0	0.0666667	1
CAX49774.1_782	1	0	0	0	0	0	0	0	0
CAX49775.1_783	1	0	0	0	0	0	0	0	0
CAX49787.1_795	1	0	0	0	0	0	0	0	0
CAX49788.1_796	36	0	0	0	0	0	0	0	0
CAX49789.1_797	4	0	0	0	0	0	0	0	0
CAX49802.1_810	27	0	0	0	0	0	0	0	0
CAX49804.1_812	1	0	0	0	0	100	0	1	1
CAX49816.1_824	8	0	0	0	0	0	0	0	0
CAX49820.1_828	4	0	0	0	0	0	0	0	0
CAX49827.1_835	88	0	0	0	0	6.81818	0	0.0681818	6
CAX49829.1_837	17	0	0	0	0	0	0	0	0
CAX49836.1_844	3	0	0	0	0	0	0	0	0
CAX49837.1_845	3	0	0	0	0	0	0	0	0
CAX49839.1_847	1	0	0	0	0	0	0	0	0
CAX49845.1_853	55	0	0	0	0	5.45455	0	0.0727273	3
CAX49846.1_854	14	0	0	0	0	21.4286	0	0.214286	3
CAX49847.1_855	4	0	0	0	0	0	0	0	0
CAX49849.1_857	186	0	0	0	0	9.13978	0	0.102151	17
CAX49851.1_859	52	0	0	0	0	7.69231	0	0.0769231	4
CAX49862.1_870	88	0	0	0	0	2.27273	0	0.0227273	2
CAX49864.1_872	2	0	0	0	0	0	0	0	0
CAX49867.1_875	11	9.09091	0	0.0909091	1	18.1818	0	0.272727	2
CAX49869.1_877	2	0	0	0	0	0	0	0	0
CAX49871.1_879	25	0	0	0	0	4	0	0.04	1
CAX49878.1_886	178	0.561798	0	0.00561798	1	5.05618	0	0.0674157	9
CAX49881.1_889	1290	0.465116	0	0.00542636	6	3.72093	0	0.0418605	48
CAX49883.1_891	2	0	0	0	0	0	0	0	0
CAX49885.1_893	274	0.729927	0	0.00729927	2	4.74453	0	0.0474453	13
CAX49887.1_895	4	0	0	0	0	0	0	0	0
CAX49891.1_899	5	0	0	0	0	0	0	0	0
CAX49893.1_901	130	0	0	0	0	3.84615	0	0.0384615	5
CAX49897.1_905	11	0	0	0	0	9.09091	0	0.0909091	1
CAX49898.1_906	37	0	0	0	0	2.7027	0	0.027027	1
CAX49901.1_909	34	0	0	0	0	2.94118	0	0.0294118	1
CAX49903.1_911	164	0	0	0	0	7.92683	0	0.0792683	13
CAX49904.1_912	18	0	0	0	0	11.1111	0	0.111111	2
CAX49909.1_917	325	1.23077	0	0.0123077	4	4.92308	0	0.0584615	16
CAX49911.1_919	1	0	0	0	0	0	0	0	0
CAX49912.1_920	18	0	0	0	0	16.6667	0	0.166667	3
CAX49917.1_925	14	0	0	0	0	0	0	0	0
CAX49922.1_930	80	0	0	0	0	3.75	0	0.0375	3
CAX49926.1_934	22	0	0	0	0	9.09091	0	0.0909091	2
CAX49928.1_936	1	0	0	0	0	0	0	0	0
CAX49930.1_938	1	0	0	0	0	0	0	0	0
CAX49934.1_942	274	0	0	0	0	9.48905	0	0.109489	26
CAX49937.1_945	21	0	0	0	0	4.7619	0	0.047619	1
CAX49944.1_952	15	0	0	0	0	0	0	0	0
CAX49955.1_963	5	0	0	0	0	20	0	0.2	1
CAX49956.1_964	115	0	0	0	0	5.21739	0	0.0956522	6
CAX49958.1_966	4	0	0	0	0	0	0	0	0
CAX49961.1_969	34	0	0	0	0	8.82353	0	0.147059	3
CAX49968.1_976	3	0	0	0	0	0	0	0	0
CAX49972.1_980	9	0	0	0	0	0	0	0	0
CAX49973.1_981	947	0	0	0	0	2.21753	0	0.0242872	21
CAX49974.1_982	18	0	0	0	0	0	0	0	0
CAX49981.1_989	4	0	0	0	0	0	0	0	0
CAX49983.1_991	37	0	0	0	0	5.40541	0	0.0540541	2
CAX49985.1_993	38	0	0	0	0	0	0	0	0
CAX49986.1_994	4	0	0	0	0	0	0	0	0
CAX49990.1_998	2	0	0	0	0	0	0	0	0
CAX49994.1_1002	8	0	0	0	0	0	0	0	0
CAX49995.1_1003	3	0	0	0	0	0	0	0	0
CAX49997.1_1005	9	0	0	0	0	0	0	0	0
CAX49998.1_1006	16	0	0	0	0	6.25	0	0.0625	1
CAX50004.1_1012	11	0	0	0	0	0	0	0	0
CAX50005.1_1013	5	0	0	0	0	20	0	0.2	1
CAX50009.1_1017	10	0	0	0	0	0	0	0	0
CAX50015.1_1023	15	0	0	0	0	0	0	0	0
CAX50025.1_1033	173	0	0	0	0	2.31214	0	0.0231214	4
CAX50030.1_1038	57	0	0	0	0	0	0	0	0
CAX50031.1_1039	1	0	0	0	0	0	0	0	0
CAX50032.1_1040	140	0	0	0	0	0	0	0	0
CAX50033.1_1041	53	0	0	0	0	5.66038	0	0.0566038	3
CAX50039.1_1047	44	0	0	0	0	4.54545	0	0.0454545	2
CAX50042.1_1050	308	0	0	0	0	3.8961	0	0.0422078	12
CAX50048.1_1056	88	0	0	0	0	4.54545	0	0.0568182	4
CAX50055.1_1063	169	0	0	0	0	3.5503	0	0.0414201	6
CAX50061.1_1069	260	0.384615	0	0.00384615	1	4.61538	0	0.0615385	12
CAX50063.1_1071	6	0	0	0	0	0	0	0	0
CAX50072.1_1080	477	0	0	0	0	5.66038	0	0.0754717	27
CAX50078.1_1086	140	0	0	0	0	7.14286	0	0.0928571	10
CAX50079.1_1087	8	0	0	0	0	0	0	0	0
CAX50083.1_1091	19	0	0	0	0	0	0	0	0
CAX50087.1_1095	88	0	0	0	0	1.13636	0	0.0113636	1
CAX50088.1_1096	42	0	0	0	0	2.38095	0	0.0238095	1
CAX50089.1_1097	1115	0.0896861	0	0.000896861	1	4.57399	0	0.0520179	51
CAX50090.1_1098	76	1.31579	0	0.0131579	1	5.26316	0	0.0657895	4
CAX50091.1_1099	15	0	0	0	0	0	0	0	0
CAX50092.1_1100	572	0	0	0	0	3.67133	0	0.0402098	21
CAX50094.1_1102	5	0	0	0	0	0	0	0	0
CAX50104.1_1112	203	0.492611	0	0.00492611	1	4.4335	0	0.044335	9
CAX50110.1_1118	436	0.458716	0	0.00458716	2	2.52294	0	0.0275229	11
CAX50113.1_1121	11	0	0	0	0	0	0	0	0
CAX50118.1_1126	2	0	0	0	0	0	0	0	0
CAX50119.1_1127	8	0	0	0	0	0	0	0	0
CAX50121.1_1129	8	0	0	0	0	12.5	0	0.25	1
CAX50123.1_1131	1	0	0	0	0	0	0	0	0
CAX50128.1_1136	4	0	0	0	0	0	0	0	0
CAX50133.1_1141	8	0	0	0	0	0	0	0	0
CAX50134.1_1142	57	0	0	0	0	1.75439	0	0.0175439	1
CAX50143.1_1151	1	0	0	0	0	0	0	0	0
CAX50166.1_1174	36	2.77778	0	0.0277778	1	8.33333	0	0.0833333	3
CAX50167.1_1175	61	0	0	0	0	6.55738	0	0.0819672	4
CAX50170.1_1178	13	0	0	0	0	23.0769	0	0.230769	3
CAX50171.1_1179	51	0	0	0	0	7.84314	0	0.0784314	4
CAX50179.1_1187	20	0	0	0	0	5	0	0.05	1
CAX50181.1_1189	19	5.26316	0	0.0526316	1	5.26316	0	0.105263	1
CAX50182.1_1190	26	0	0	0	0	0	0	0	0
CAX50185.1_1193	3	0	0	0	0	0	0	0	0
CAX50186.1_1194	8	0	0	0	0	0	0	0	0
CAX50188.1_1196	335	0	0	0	0	2.68657	0	0.0268657	9
CAX50189.1_1197	28	0	0	0	0	10.7143	0	0.142857	3
CAX50191.1_1199	207	0.483092	0	0.00483092	1	4.83092	0	0.057971	10
CAX50193.1_1201	28	0	0	0	0	3.57143	0	0.0357143	1
CAX50195.1_1203	31	0	0	0	0	9.67742	0	0.0967742	3
CAX50201.1_1209	18	0	0	0	0	0	0	0	0
CAX50207.1_1215	2	0	0	0	0	0	0	0	0
CAX50213.1_1221	1	0	0	0	0	0	0	0	0
CAX50217.1_1225	1	0	0	0	0	0	0	0	0
CAX50218.1_1226	445	0.224719	0	0.00224719	1	5.61798	0	0.0629213	25
CAX50220.1_1228	14	0	0	0	0	7.14286	0	0.0714286	1
CAX50225.1_1233	1	0	0	0	0	0	0	0	0
CAX50232.1_1240	22	0	0	0	0	0	0	0	0
CAX50237.1_1245	1	0	0	0	0	0	0	0	0
CAX50240.1_1248	2	0	0	0	0	0	0	0	0
CAX50243.1_1251	20	0	0	0	0	10	0	0.1	2
CAX50245.1_1253	2	0	0	0	0	50	0	0.5	1
CAX50247.1_1255	346	0.289017	0	0.00289017	1	4.33526	0	0.0491329	15
CAX50260.1_1268	176	0.568182	0	0.0113636	1	6.81818	0	0.0738636	12
CAX50262.1_1270	15	0	0	0	0	0	0	0	0
CAX50263.1_1271	1	0	0	0	0	0	0	0	0
CAX50267.1_1275	988	0.202429	0	0.00202429	2	4.55466	0	0.0536437	45
CAX50271.1_1279	40	0	0	0	0	2.5	0	0.025	1
CAX50276.1_1284	17	0	0	0	0	0	0	0	0
CAX50277.1_1285	28	0	0	0	0	0	0	0	0
CAX50278.1_1286	146	0	0	0	0	2.05479	0	0.0205479	3
CAX50280.1_1288	118	0	0	0	0	4.23729	0	0.0508475	5
CAX50282.1_1290	44	0	0	0	0	0	0	0	0
CAX50284.1_1292	913	0.219058	0	0.00219058	2	5.80504	0	0.0657174	53
CAX50285.1_1293	19	0	0	0	0	10.5263	0	0.105263	2
CAX50290.1_1298	6	0	0	0	0	0	0	0	0
CAX50293.1_1301	56	0	0	0	0	3.57143	0	0.0357143	2
CAX50294.1_1302	38	0	0	0	0	2.63158	0	0.0263158	1
CAX50295.1_1303	12	0	0	0	0	0	0	0	0
CAX50300.1_1308	327	0	0	0	0	3.66972	0	0.0366972	12
CAX50301.1_1309	151	0.662252	0	0.00662252	1	2.64901	0	0.0397351	4
CAX50306.1_1314	10	0	0	0	0	10	0	0.1	1
CAX50307.1_1315	2	0	0	0	0	0	0	0	0
CAX50309.1_1317	15	0	0	0	0	0	0	0	0
CAX50311.1_1319	1	0	0	0	0	0	0	0	0
CAX50312.1_1320	2	0	0	0	0	0	0	0	0
CAX50317.1_1325	9	0	0	0	0	0	0	0	0
CAX50324.1_1332	7	0	0	0	0	0	0	0	0
CAX50329.1_1337	9	0	0	0	0	0	0	0	0
CAX50330.1_1338	8	0	0	0	0	0	0	0	0
CAX50340.1_1348	4	0	0	0	0	0	0	0	0
CAX50344.1_1352	121	0	0	0	0	4.95868	0	0.0495868	6
CAX50353.1_1361	220	0	0	0	0	5.45455	0	0.0545455	12
CAX50354.1_1362	14	0	0	0	0	0	0	0	0
CAX50372.1_1380	3	0	0	0	0	0	0	0	0
CAX50373.1_1381	23	0	0	0	0	8.69565	0	0.0869565	2
CAX50387.1_1395	6	0	0	0	0	0	0	0	0
CAX50392.1_1400	10	0	0	0	0	0	0	0	0
CAX50394.1_1402	237	0.843882	0	0.00843882	2	5.90717	0	0.0675105	14
CAX50395.1_1403	3	0	0	0	0	0	0	0	0
CAX50396.1_1404	27	0	0	0	0	0	0	0	0
CAX50397.1_1405	72	2.77778	0	0.0277778	2	4.16667	0	0.0416667	3
CAX50398.1_1406	157	0.636943	0	0.00636943	1	2.54777	0	0.0318471	4
CAX50400.1_1408	7	0	0	0	0	0	0	0	0
CAX50401.1_1409	1007	0.397219	0	0.00397219	4	4.86594	0	0.0566038	49
CAX50403.1_1411	2	0	0	0	0	0	0	0	0
CAX50410.1_1418	19	0	0	0	0	0	0	0	0
CAX50411.1_1419	23	0	0	0	0	4.34783	0	0.0869565	1
CAX50414.1_1422	101	0	0	0	0	2.9703	0	0.039604	3
CAX50415.1_1423	166	1.20482	0	0.0180723	2	3.61446	0	0.0481928	6
CAX50418.1_1426	2	0	0	0	0	0	0	0	0
CAX50419.1_1427	42	0	0	0	0	4.7619	0	0.047619	2
CAX50422.1_1430	51	0	0	0	0	3.92157	0	0.0588235	2
CAX50424.1_1432	120	2.5	0	0.025	3	5.83333	0	0.0666667	7
CAX50426.1_1434	47	0	0	0	0	4.25532	0	0.0425532	2
CAX50427.1_1435	45	0	0	0	0	4.44444	0	0.0444444	2
CAX50428.1_1436	10	0	0	0	0	0	0	0	0
CAX50430.1_1438	3	0	0	0	0	0	0	0	0
CAX50431.1_1439	5	0	0	0	0	0	0	0	0
CAX50438.1_1446	35	0	0	0	0	2.85714	0	0.0285714	1
CAX50441.1_1449	8	0	0	0	0	0	0	0	0
CAX50448.1_1456	14	0	0	0	0	7.14286	0	0.0714286	1
CAX50457.1_1465	19	0	0	0	0	21.0526	0	0.210526	4
CAX50458.1_1466	1	0	0	0	0	0	0	0	0
CAX50461.1_1469	1	0	0	0	0	0	0	0	0
CAX50468.1_1476	59	0	0	0	0	6.77966	0	0.0677966	4
CAX50470.1_1478	1	0	0	0	0	0	0	0	0
CAX50473.1_1481	50	0	0	0	0	8	0	0.1	4
CAX50475.1_1483	42	2.38095	0	0.0238095	1	2.38095	0	0.0238095	1
CAX50476.1_1484	14	0	0	0	0	0	0	0	0
CAX50477.1_1485	25	4	0	0.04	1	0	0	0	0
CAX50479.1_1487	28	0	0	0	0	0	0	0	0
CAX50485.1_1493	1	0	0	0	0	0	0	0	0
CAX50488.1_1496	416	0	0	0	0	4.08654	0	0.0480769	17
CAX50501.1_1509	214	0	0	0	0	5.60748	0	0.0560748	12
CAX50507.1_1515	6	0	0	0	0	0	0	0	0
CAX50508.1_1516	63	0	0	0	0	6.34921	0	0.0634921	4
CAX50510.1_1518	2	0	0	0	0	0	0	0	0
CAX50514.1_1522	55	0	0	0	0	0	0	0	0
CAX50515.1_1523	22	0	0	0	0	4.54545	0	0.0454545	1
CAX50519.1_1527	2	0	0	0	0	0	0	0	0
CAX50523.1_1531	582	0.343643	0	0.00343643	2	5.49828	0	0.0601375	32
CAX50525.1_1533	71	0	0	0	0	4.22535	0	0.0422535	3
CAX50526.1_1534	20	0	0	0	0	0	0	0	0
CAX50529.1_1537	1	0	0	0	0	0	0	0	0
CAX50531.1_1539	65	1.53846	0	0.0153846	1	24.6154	0	0.246154	16
CAX50534.1_1542	31	0	0	0	0	9.67742	0	0.0967742	3
CAX50537.1_1545	73	1.36986	0	0.0136986	1	6.84932	0	0.0684932	5
CAX50542.1_1550	3	0	0	0	0	0	0	0	0
CAX50544.1_1552	30	0	0	0	0	0	0	0	0
CAX50547.1_1555	10	0	0	0	0	0	0	0	0
CAX50560.1_1568	1	0	0	0	0	0	0	0	0
CAX50569.1_1577	1	0	0	0	0	0	0	0	0
CAX50571.1_1579	3	0	0	0	0	0	0	0	0
CAX50578.1_1586	73	0	0	0	0	6.84932	0	0.0821918	5
CAX50580.1_1588	137	0	0	0	0	8.75912	0	0.0948905	12
CAX50584.1_1592	7	0	0	0	0	0	0	0	0
CAX50585.1_1593	7	0	0	0	0	0	0	0	0
CAX50587.1_1595	1	0	0	0	0	0	0	0	0
CAX50588.1_1596	15	0	0	0	0	13.3333	0	0.2	2
CAX50591.1_1599	223	0.44843	0	0.0044843	1	7.62332	0	0.0986547	17
CAX50601.1_1609	3	0	0	0	0	0	0	0	0
CAX50607.1_1615	37	0	0	0	0	2.7027	0	0.027027	1
CAX50609.1_1617	13	0	0	0	0	7.69231	0	0.153846	1
CAX50610.1_1618	6	0	0	0	0	0	0	0	0
CAX50611.1_1619	93	0	0	0	0	2.15054	0	0.0215054	2
CAX50613.1_1621	316	0.949367	0	0.00949367	3	5.6962	0	0.0886076	18
CAX50614.1_1622	38	0	0	0	0	2.63158	0	0.0263158	1
CAX50615.1_1623	2	0	0	0	0	0	0	0	0
CAX50618.1_1626	36	0	0	0	0	8.33333	0	0.111111	3
CAX50619.1_1627	45	0	0	0	0	0	0	0	0
CAX50620.1_1628	163	0.613497	0	0.00613497	1	8.58896	0	0.0858896	14
CAX50622.1_1630	27	0	0	0	0	7.40741	0	0.111111	2
CAX50626.1_1634	5	0	0	0	0	0	0	0	0
CAX50631.1_1639	26	0	0	0	0	7.69231	0	0.0769231	2
CAX50634.1_1642	63	0	0	0	0	12.6984	0	0.142857	8
CAX50640.1_1648	37	0	0	0	0	5.40541	0	0.0540541	2
CAX50641.1_1649	5	0	0	0	0	0	0	0	0
CAX50644.1_1652	56	0	0	0	0	3.57143	0	0.0357143	2
CAX50649.1_1657	809	0.494438	0	0.00618047	4	5.19159	0	0.0580964	42
CAX50651.1_1659	54	0	0	0	0	0	0	0	0
CAX50652.1_1660	19	0	0	0	0	5.26316	0	0.105263	1
CAX50653.1_1661	36	0	0	0	0	8.33333	0	0.0833333	3
CAX50655.1_1663	99	0	0	0	0	7.07071	0	0.0808081	7
CAX50656.1_1664	585	0	0	0	0	2.90598	0	0.0324786	17
CAX50658.1_1666	44	0	0	0	0	2.27273	0	0.0227273	1
CAX50662.1_1670	2	0	0	0	0	0	0	0	0
CAX50663.1_1671	29	0	0	0	0	0	0	0	0
CAX50664.1_1672	6	0	0	0	0	16.6667	0	0.166667	1
CAX50665.1_1673	18	0	0	0	0	11.1111	0	0.111111	2
CAX50672.1_1680	2	0	0	0	0	0	0	0	0
CAX50677.1_1685	60	0	0	0	0	0	0	0	0
CAX50680.1_1688	410	0	0	0	0	3.90244	0	0.0390244	16
CAX50682.1_1690	3	0	0	0	0	0	0	0	0
CAX50683.1_1691	45	0	0	0	0	4.44444	0	0.0888889	2
CAX50686.1_1694	426	0	0	0	0	1.87793	0	0.0234742	8
CAX50690.1_1698	20	0	0	0	0	0	0	0	0
CAX50691.1_1699	2	0	0	0	0	50	0	0.5	1
CAX50695.1_1703	61	0	0	0	0	1.63934	0	0.0163934	1
CAX50696.1_1704	26	0	0	0	0	0	0	0	0
CAX50697.1_1705	60	0	0	0	0	1.66667	0	0.0166667	1
CAX50699.1_1707	6	0	0	0	0	0	0	0	0
CAX50701.1_1709	368	0	0	0	0	3.53261	0	0.0380435	13
CAX50726.1_1734	203	0.492611	0	0.00492611	1	7.88177	0	0.0788177	16
CAX50727.1_1735	102	0.980392	0	0.00980392	1	4.90196	0	0.0686275	5
CAX50728.1_1736	41	0	0	0	0	2.43902	0	0.0243902	1
CAX50729.1_1737	10	0	0	0	0	10	0	0.1	1
CAX50730.1_1738	289	0.692042	0.346021	0.017301	2	10.3806	0	0.114187	30
CAX50733.1_1741	9	0	0	0	0	0	0	0	0
CAX50738.1_1746	1	0	0	0	0	0	0	0	0
CAX50745.1_1753	1	0	0	0	0	0	0	0	0
CAX50752.1_1760	282	0.70922	0	0.0070922	2	8.51064	0	0.0992908	24
CAX50753.1_1761	5	0	0	0	0	0	0	0	0
CAX50763.1_1771	1	0	0	0	0	0	0	0	0
CAX50764.1_1772	168	0	0	0	0	5.95238	0	0.0654762	10
CAX50765.1_1773	141	0.70922	0	0.0070922	1	6.38298	0	0.070922	9
CAX50772.1_1780	1	0	0	0	0	0	0	0	0
CAX50773.1_1781	45	0	0	0	0	0	0	0	0
CAX50777.1_1785	9	0	0	0	0	0	0	0	0
CAX50778.1_1786	11	0	0	0	0	0	0	0	0
CAX50779.1_1787	19	0	0	0	0	0	0	0	0
CAX50780.1_1788	17	0	0	0	0	0	0	0	0
CAX50781.1_1789	28	0	0	0	0	0	0	0	0
CAX50794.1_1802	2	0	0	0	0	0	0	0	0
CAX50797.1_1805	1	0	0	0	0	0	0	0	0
CAX50798.1_1806	51	1.96078	0	0.0196078	1	9.80392	0	0.0980392	5
CAX50804.1_1812	87	0	0	0	0	1.14943	0	0.0114943	1
CAX50805.1_1813	64	0	0	0	0	12.5	0	0.125	8
CAX50813.1_1821	2	0	0	0	0	0	0	0	0
CAX50816.1_1824	110	0	0	0	0	0.909091	0	0.0181818	1
CAX50817.1_1825	217	0	0	0	0	3.68664	0	0.0460829	8
CAX50818.1_1826	267	0.374532	0	0.00374532	1	2.99625	0	0.0299625	8
CAX50821.1_1829	28	0	0	0	0	3.57143	0	0.0357143	1
CAX50822.1_1830	664	1.05422	0	0.0105422	7	5.42169	0	0.0587349	36
CAX50823.1_1831	884	0.339367	0	0.00339367	3	6.78733	0	0.0904977	60
CAX50840.1_1848	1	0	0	0	0	0	0	0	0
CAX50842.1_1850	105	0	0	0	0	3.80952	0	0.047619	4
CAX50844.1_1852	2	0	0	0	0	0	0	0	0
CAX50845.1_1853	4	0	0	0	0	0	0	0	0
CAX50846.1_1854	55	0	0	0	0	7.27273	0	0.0727273	4
CAX50851.1_1859	7	0	0	0	0	0	0	0	0
CAX50852.1_1860	2	0	0	0	0	0	0	0	0
CAX50853.1_1861	101	1.9802	0	0.019802	2	4.9505	0	0.049505	5
CAX50856.1_1864	19	0	0	0	0	0	0	0	0
CAX50859.1_1867	2	0	0	0	0	0	0	0	0
CAX50862.1_1870	11	0	0	0	0	9.09091	0	0.0909091	1
CAX50867.1_1875	4	0	0	0	0	25	0	0.25	1
CAX50868.1_1876	1	0	0	0	0	0	0	0	0
CAX50872.1_1880	406	0.246305	0	0.00492611	1	6.40394	0	0.0689655	26
CAX50873.1_1881	7	0	0	0	0	0	0	0	0
CAX50881.1_1889	8	0	0	0	0	0	0	0	0
CAX50886.1_1894	24	0	0	0	0	12.5	0	0.125	3
CAX50889.1_1897	11	0	0	0	0	0	0	0	0
CAX50891.1_1899	15	0	0	0	0	0	0	0	0
CAX50894.1_1902	122	0	0	0	0	1.63934	0	0.0163934	2
CAX50895.1_1903	263	0	0	0	0	1.90114	0	0.0190114	5
CAX50896.1_1904	111	0.900901	0	0.00900901	1	6.30631	0	0.0630631	7
CAX50900.1_1908	110	0	0	0	0	4.54545	0	0.0454545	5
CAX50901.1_1909	76	0	0	0	0	6.57895	0	0.0657895	5
CAX50902.1_1910	35	0	0	0	0	0	0	0	0
CAX50907.1_1915	38	0	0	0	0	0	0	0	0
CAX50908.1_1916	435	0.229885	0	0.00229885	1	3.67816	0	0.0367816	16
CAX50910.1_1918	2	0	0	0	0	0	0	0	0
CAX50911.1_1919	482	0.207469	0	0.00207469	1	4.97925	0	0.0497925	24
CAX50920.1_1928	74	0	0	0	0	1.35135	0	0.0135135	1
CAX50921.1_1929	86	0	0	0	0	6.97674	0	0.0697674	6
CAX50922.1_1930	56	1.78571	0	0.0178571	1	14.2857	0	0.160714	8
CAX50924.1_1932	18	0	0	0	0	0	0	0	0
CAX50926.1_1934	1	0	0	0	0	0	0	0	0
CAX50936.1_1944	38	0	0	0	0	2.63158	0	0.0263158	1
CAX50937.1_1945	75	0	0	0	0	4	0	0.0533333	3
CAX50938.1_1946	61	0	0	0	0	14.7541	0	0.163934	9
CAX50941.1_1949	11	0	0	0	0	0	0	0	0
CAX50943.1_1951	789	0	0	0	0	2.40811	0	0.0291508	19
CAX50944.1_1952	12	0	0	0	0	0	0	0	0
CAX50950.1_1958	10	0	0	0	0	10	0	0.1	1
CAX50952.1_1960	46	0	0	0	0	0	0	0	0
CAX50954.1_1962	9	0	0	0	0	11.1111	0	0.111111	1
CAX50955.1_1963	1	0	0	0	0	0	0	0	0
CAX50958.1_1966	50	2	0	0.02	1	2	0	0.02	1
CAX50963.1_1971	26	0	0	0	0	0	0	0	0
CAX50966.1_1974	51	1.96078	0	0.0196078	1	7.84314	0	0.0784314	4
CAX50967.1_1975	10	0	0	0	0	0	0	0	0
CAX50969.1_1977	4	0	0	0	0	0	0	0	0
CAX50970.1_1978	13	0	0	0	0	0	0	0	0
CAX50972.1_1980	10	0	0	0	0	0	0	0	0
CAX50974.1_1982	35	0	0	0	0	0	0	0	0
CAX50980.1_1988	3	0	0	0	0	0	0	0	0
CAX50981.1_1989	60	1.66667	0	0.0166667	1	6.66667	0	0.1	4
CAX50984.1_1992	15	0	0	0	0	0	0	0	0
CAX50985.1_1993	44	0	0	0	0	9.09091	0	0.136364	4
CAX50987.1_1995	25	0	0	0	0	4	0	0.04	1
CAX50988.1_1996	1	0	0	0	0	0	0	0	0
CAX50989.1_1997	197	0	0	0	0	8.62944	0	0.0913706	17
CAX50990.1_1998	2	0	0	0	0	50	0	0.5	1
CAX50993.1_2001	8	0	0	0	0	0	0	0	0
CAX50994.1_2002	11	0	0	0	0	9.09091	0	0.0909091	1
CAX50997.1_2005	5	0	0	0	0	20	0	0.2	1
CAX50999.1_2007	10	0	0	0	0	0	0	0	0
CAX51005.1_2013	389	0.257069	0	0.00257069	1	10.5398	0	0.115681	41
CAX51007.1_2015	18	0	0	0	0	11.1111	0	0.111111	2
CAX51008.1_2016	3	0	0	0	0	0	0	0	0
CAX51012.1_2020	1410	0	0	0	0	4.8227	0	0.0546099	68
CAX51013.1_2021	355	0	0	0	0	4.78873	0	0.0507042	17
CAX51015.1_2023	126	0	0	0	0	1.5873	0	0.0238095	2
CAX51021.1_2029	3	0	0	0	0	0	0	0	0
CAX51022.1_2030	1	0	0	0	0	100	0	1	1
CAX51024.1_2032	55	0	0	0	0	9.09091	0	0.0909091	5
CAX51026.1_2034	645	0.155039	0	0.00155039	1	4.65116	0	0.0527132	30
CAX51029.1_2037	36	0	0	0	0	0	0	0	0
CAX51041.1_2049	232	0	0	0	0	4.31034	0	0.0431034	10
CAX51042.1_2050	533	0.375235	0	0.00375235	2	7.87992	0	0.0900563	42
CAX51043.1_2051	5	0	0	0	0	0	0	0	0
CAX51044.1_2052	22	0	0	0	0	4.54545	0	0.0454545	1
CAX51046.1_2054	486	0.205761	0	0.00205761	1	4.73251	0	0.0493827	23
CAX51054.1_2062	38	0	0	0	0	2.63158	0	0.0263158	1
CAX51056.1_2064	27	0	0	0	0	7.40741	0	0.0740741	2
CAX51061.1_2069	23	0	0	0	0	8.69565	0	0.0869565	2
CAX51063.1_2071	1	0	0	0	0	0	0	0	0
CAX51071.1_2079	1	0	0	0	0	0	0	0	0
CAX51074.1_2082	1	0	0	0	0	0	0	0	0
CAX51077.1_2085	12	0	0	0	0	0	0	0	0
CAX51091.1_2099	35	0	0	0	0	11.4286	0	0.114286	4
CAX51097.1_2105	2	0	0	0	0	0	0	0	0
CAX51098.1_2106	114	1.75439	0	0.0175439	2	6.14035	0	0.0701754	7
CAX51099.1_2107	1	0	0	0	0	0	0	0	0
CAX51100.1_2108	13	0	0	0	0	0	0	0	0
CAX51102.1_2110	16	0	0	0	0	0	0	0	0
CAX51111.1_2119	1	0	0	0	0	0	0	0	0
CAX51115.1_2123	17	0	0	0	0	5.88235	0	0.0588235	1
CAX48993.1_1	0	NA	NA	NA	NA	NA	NA	NA	NA
CAX48994.1_2	0	NA	NA	NA	NA	NA	NA	NA	NA
CAX48996.1_4	0	NA	NA	NA	NA	NA	NA	NA	NA
CAX48998.1_6	0	NA	NA	NA	NA	NA	NA	NA	NA
CAX49000.1_8	0	NA	NA	NA	NA	NA	NA	NA	NA
CAX49005.1_13	0	NA	NA	NA	NA	NA	NA	NA	NA
CAX49006.1_14	0	NA	NA	NA	NA	NA	NA	NA	NA
CAX49009.1_17	0	NA	NA	NA	NA	NA	NA	NA	NA
CAX49017.1_25	0	NA	NA	NA	NA	NA	NA	NA	NA
CAX49020.1_28	0	NA	NA	NA	NA	NA	NA	NA	NA
CAX49021.1_29	0	NA	NA	NA	NA	NA	NA	NA	NA
CAX49024.1_32	0	NA	NA	NA	NA	NA	NA	NA	NA
CAX49028.1_36	0	NA	NA	NA	NA	NA	NA	NA	NA
CAX49029.1_37	0	NA	NA	NA	NA	NA	NA	NA	NA
CAX49034.1_42	0	NA	NA	NA	NA	NA	NA	NA	NA
CAX49035.1_43	0	NA	NA	NA	NA	NA	NA	NA	NA
CAX49036.1_44	0	NA	NA	NA	NA	NA	NA	NA	NA
CAX49038.1_46	0	NA	NA	NA	NA	NA	NA	NA	NA
CAX49039.1_47	0	NA	NA	NA	NA	NA	NA	NA	NA
CAX49040.1_48	0	NA	NA	NA	NA	NA	NA	NA	NA
CAX49042.1_50	0	NA	NA	NA	NA	NA	NA	NA	NA
CAX49051.1_59	0	NA	NA	NA	NA	NA	NA	NA	NA
CAX49053.1_61	0	NA	NA	NA	NA	NA	NA	NA	NA
CAX49055.1_63	0	NA	NA	NA	NA	NA	NA	NA	NA
CAX49068.1_76	0	NA	NA	NA	NA	NA	NA	NA	NA
CAX49069.1_77	0	NA	NA	NA	NA	NA	NA	NA	NA
CAX49071.1_79	0	NA	NA	NA	NA	NA	NA	NA	NA
CAX49072.1_80	0	NA	NA	NA	NA	NA	NA	NA	NA
CAX49073.1_81	0	NA	NA	NA	NA	NA	NA	NA	NA
CAX49078.1_86	0	NA	NA	NA	NA	NA	NA	NA	NA
CAX49080.1_88	0	NA	NA	NA	NA	NA	NA	NA	NA
CAX49083.1_91	0	NA	NA	NA	NA	NA	NA	NA	NA
CAX49086.1_94	0	NA	NA	NA	NA	NA	NA	NA	NA
CAX49089.1_97	0	NA	NA	NA	NA	NA	NA	NA	NA
CAX49090.1_98	0	NA	NA	NA	NA	NA	NA	NA	NA
CAX49091.1_99	0	NA	NA	NA	NA	NA	NA	NA	NA
CAX49094.1_102	0	NA	NA	NA	NA	NA	NA	NA	NA
CAX49095.1_103	0	NA	NA	NA	NA	NA	NA	NA	NA
CAX49098.1_106	0	NA	NA	NA	NA	NA	NA	NA	NA
CAX49099.1_107	0	NA	NA	NA	NA	NA	NA	NA	NA
CAX49100.1_108	0	NA	NA	NA	NA	NA	NA	NA	NA
CAX49102.1_110	0	NA	NA	NA	NA	NA	NA	NA	NA
CAX49103.1_111	0	NA	NA	NA	NA	NA	NA	NA	NA
CAX49105.1_113	0	NA	NA	NA	NA	NA	NA	NA	NA
CAX49106.1_114	0	NA	NA	NA	NA	NA	NA	NA	NA
CAX49107.1_115	0	NA	NA	NA	NA	NA	NA	NA	NA
CAX49108.1_116	0	NA	NA	NA	NA	NA	NA	NA	NA
CAX49111.1_119	0	NA	NA	NA	NA	NA	NA	NA	NA
CAX49119.1_127	0	NA	NA	NA	NA	NA	NA	NA	NA
CAX49120.1_128	0	NA	NA	NA	NA	NA	NA	NA	NA
CAX49155.1_163	0	NA	NA	NA	NA	NA	NA	NA	NA
CAX49165.1_173	0	NA	NA	NA	NA	NA	NA	NA	NA
CAX49166.1_174	0	NA	NA	NA	NA	NA	NA	NA	NA
CAX49167.1_175	0	NA	NA	NA	NA	NA	NA	NA	NA
CAX49168.1_176	0	NA	NA	NA	NA	NA	NA	NA	NA
CAX49170.1_178	0	NA	NA	NA	NA	NA	NA	NA	NA
CAX49173.1_181	0	NA	NA	NA	NA	NA	NA	NA	NA
CAX49174.1_182	0	NA	NA	NA	NA	NA	NA	NA	NA
CAX49181.1_189	0	NA	NA	NA	NA	NA	NA	NA	NA
CAX49184.1_192	0	NA	NA	NA	NA	NA	NA	NA	NA
CAX49186.1_194	0	NA	NA	NA	NA	NA	NA	NA	NA
CAX49188.1_196	0	NA	NA	NA	NA	NA	NA	NA	NA
CAX49190.1_198	0	NA	NA	NA	NA	NA	NA	NA	NA
CAX49192.1_200	0	NA	NA	NA	NA	NA	NA	NA	NA
CAX49197.1_205	0	NA	NA	NA	NA	NA	NA	NA	NA
CAX49199.1_207	0	NA	NA	NA	NA	NA	NA	NA	NA
CAX49205.1_213	0	NA	NA	NA	NA	NA	NA	NA	NA
CAX49210.1_218	0	NA	NA	NA	NA	NA	NA	NA	NA
CAX49211.1_219	0	NA	NA	NA	NA	NA	NA	NA	NA
CAX49212.1_220	0	NA	NA	NA	NA	NA	NA	NA	NA
CAX49213.1_221	0	NA	NA	NA	NA	NA	NA	NA	NA
CAX49214.1_222	0	NA	NA	NA	NA	NA	NA	NA	NA
CAX49215.1_223	0	NA	NA	NA	NA	NA	NA	NA	NA
CAX49216.1_224	0	NA	NA	NA	NA	NA	NA	NA	NA
CAX49222.1_230	0	NA	NA	NA	NA	NA	NA	NA	NA
CAX49223.1_231	0	NA	NA	NA	NA	NA	NA	NA	NA
CAX49224.1_232	0	NA	NA	NA	NA	NA	NA	NA	NA
CAX49226.1_234	0	NA	NA	NA	NA	NA	NA	NA	NA
CAX49227.1_235	0	NA	NA	NA	NA	NA	NA	NA	NA
CAX49235.1_243	0	NA	NA	NA	NA	NA	NA	NA	NA
CAX49237.1_245	0	NA	NA	NA	NA	NA	NA	NA	NA
CAX49239.1_247	0	NA	NA	NA	NA	NA	NA	NA	NA
CAX49242.1_250	0	NA	NA	NA	NA	NA	NA	NA	NA
CAX49245.1_253	0	NA	NA	NA	NA	NA	NA	NA	NA
CAX49246.1_254	0	NA	NA	NA	NA	NA	NA	NA	NA
CAX49252.1_260	0	NA	NA	NA	NA	NA	NA	NA	NA
CAX49253.1_261	0	NA	NA	NA	NA	NA	NA	NA	NA
CAX49255.1_263	0	NA	NA	NA	NA	NA	NA	NA	NA
CAX49256.1_264	0	NA	NA	NA	NA	NA	NA	NA	NA
CAX49257.1_265	0	NA	NA	NA	NA	NA	NA	NA	NA
CAX49262.1_270	0	NA	NA	NA	NA	NA	NA	NA	NA
CAX49264.1_272	0	NA	NA	NA	NA	NA	NA	NA	NA
CAX49266.1_274	0	NA	NA	NA	NA	NA	NA	NA	NA
CAX49267.1_275	0	NA	NA	NA	NA	NA	NA	NA	NA
CAX49268.1_276	0	NA	NA	NA	NA	NA	NA	NA	NA
CAX49271.1_279	0	NA	NA	NA	NA	NA	NA	NA	NA
CAX49272.1_280	0	NA	NA	NA	NA	NA	NA	NA	NA
CAX49274.1_282	0	NA	NA	NA	NA	NA	NA	NA	NA
CAX49280.1_288	0	NA	NA	NA	NA	NA	NA	NA	NA
CAX49281.1_289	0	NA	NA	NA	NA	NA	NA	NA	NA
CAX49284.1_292	0	NA	NA	NA	NA	NA	NA	NA	NA
CAX49285.1_293	0	NA	NA	NA	NA	NA	NA	NA	NA
CAX49287.1_295	0	NA	NA	NA	NA	NA	NA	NA	NA
CAX49288.1_296	0	NA	NA	NA	NA	NA	NA	NA	NA
CAX49294.1_302	0	NA	NA	NA	NA	NA	NA	NA	NA
CAX49296.1_304	0	NA	NA	NA	NA	NA	NA	NA	NA
CAX49297.1_305	0	NA	NA	NA	NA	NA	NA	NA	NA
CAX49298.1_306	0	NA	NA	NA	NA	NA	NA	NA	NA
CAX49299.1_307	0	NA	NA	NA	NA	NA	NA	NA	NA
CAX49300.1_308	0	NA	NA	NA	NA	NA	NA	NA	NA
CAX49301.1_309	0	NA	NA	NA	NA	NA	NA	NA	NA
CAX49308.1_316	0	NA	NA	NA	NA	NA	NA	NA	NA
CAX49315.1_323	0	NA	NA	NA	NA	NA	NA	NA	NA
CAX49316.1_324	0	NA	NA	NA	NA	NA	NA	NA	NA
CAX49317.1_325	0	NA	NA	NA	NA	NA	NA	NA	NA
CAX49318.1_326	0	NA	NA	NA	NA	NA	NA	NA	NA
CAX49322.1_330	0	NA	NA	NA	NA	NA	NA	NA	NA
CAX49323.1_331	0	NA	NA	NA	NA	NA	NA	NA	NA
CAX49325.1_333	0	NA	NA	NA	NA	NA	NA	NA	NA
CAX49326.1_334	0	NA	NA	NA	NA	NA	NA	NA	NA
CAX49328.1_336	0	NA	NA	NA	NA	NA	NA	NA	NA
CAX49329.1_337	0	NA	NA	NA	NA	NA	NA	NA	NA
CAX49330.1_338	0	NA	NA	NA	NA	NA	NA	NA	NA
CAX49334.1_342	0	NA	NA	NA	NA	NA	NA	NA	NA
CAX49335.1_343	0	NA	NA	NA	NA	NA	NA	NA	NA
CAX49338.1_346	0	NA	NA	NA	NA	NA	NA	NA	NA
CAX49339.1_347	0	NA	NA	NA	NA	NA	NA	NA	NA
CAX49341.1_349	0	NA	NA	NA	NA	NA	NA	NA	NA
CAX49342.1_350	0	NA	NA	NA	NA	NA	NA	NA	NA
CAX49345.1_353	0	NA	NA	NA	NA	NA	NA	NA	NA
CAX49346.1_354	0	NA	NA	NA	NA	NA	NA	NA	NA
CAX49348.1_356	0	NA	NA	NA	NA	NA	NA	NA	NA
CAX49349.1_357	0	NA	NA	NA	NA	NA	NA	NA	NA
CAX49350.1_358	0	NA	NA	NA	NA	NA	NA	NA	NA
CAX49351.1_359	0	NA	NA	NA	NA	NA	NA	NA	NA
CAX49352.1_360	0	NA	NA	NA	NA	NA	NA	NA	NA
CAX49354.1_362	0	NA	NA	NA	NA	NA	NA	NA	NA
CAX49359.1_367	0	NA	NA	NA	NA	NA	NA	NA	NA
CAX49360.1_368	0	NA	NA	NA	NA	NA	NA	NA	NA
CAX49364.1_372	0	NA	NA	NA	NA	NA	NA	NA	NA
CAX49367.1_375	0	NA	NA	NA	NA	NA	NA	NA	NA
CAX49372.1_380	0	NA	NA	NA	NA	NA	NA	NA	NA
CAX49373.1_381	0	NA	NA	NA	NA	NA	NA	NA	NA
CAX49382.1_390	0	NA	NA	NA	NA	NA	NA	NA	NA
CAX49383.1_391	0	NA	NA	NA	NA	NA	NA	NA	NA
CAX49384.1_392	0	NA	NA	NA	NA	NA	NA	NA	NA
CAX49385.1_393	0	NA	NA	NA	NA	NA	NA	NA	NA
CAX49386.1_394	0	NA	NA	NA	NA	NA	NA	NA	NA
CAX49388.1_396	0	NA	NA	NA	NA	NA	NA	NA	NA
CAX49389.1_397	0	NA	NA	NA	NA	NA	NA	NA	NA
CAX49391.1_399	0	NA	NA	NA	NA	NA	NA	NA	NA
CAX49392.1_400	0	NA	NA	NA	NA	NA	NA	NA	NA
CAX49395.1_403	0	NA	NA	NA	NA	NA	NA	NA	NA
CAX49396.1_404	0	NA	NA	NA	NA	NA	NA	NA	NA
CAX49397.1_405	0	NA	NA	NA	NA	NA	NA	NA	NA
CAX49398.1_406	0	NA	NA	NA	NA	NA	NA	NA	NA
CAX49401.1_409	0	NA	NA	NA	NA	NA	NA	NA	NA
CAX49402.1_410	0	NA	NA	NA	NA	NA	NA	NA	NA
CAX49411.1_419	0	NA	NA	NA	NA	NA	NA	NA	NA
CAX49413.1_421	0	NA	NA	NA	NA	NA	NA	NA	NA
CAX49414.1_422	0	NA	NA	NA	NA	NA	NA	NA	NA
CAX49415.1_423	0	NA	NA	NA	NA	NA	NA	NA	NA
CAX49416.1_424	0	NA	NA	NA	NA	NA	NA	NA	NA
CAX49420.1_428	0	NA	NA	NA	NA	NA	NA	NA	NA
CAX49421.1_429	0	NA	NA	NA	NA	NA	NA	NA	NA
CAX49422.1_430	0	NA	NA	NA	NA	NA	NA	NA	NA
CAX49424.1_432	0	NA	NA	NA	NA	NA	NA	NA	NA
CAX49426.1_434	0	NA	NA	NA	NA	NA	NA	NA	NA
CAX49429.1_437	0	NA	NA	NA	NA	NA	NA	NA	NA
CAX49430.1_438	0	NA	NA	NA	NA	NA	NA	NA	NA
CAX49431.1_439	0	NA	NA	NA	NA	NA	NA	NA	NA
CAX49433.1_441	0	NA	NA	NA	NA	NA	NA	NA	NA
CAX49437.1_445	0	NA	NA	NA	NA	NA	NA	NA	NA
CAX49438.1_446	0	NA	NA	NA	NA	NA	NA	NA	NA
CAX49439.1_447	0	NA	NA	NA	NA	NA	NA	NA	NA
CAX49441.1_449	0	NA	NA	NA	NA	NA	NA	NA	NA
CAX49442.1_450	0	NA	NA	NA	NA	NA	NA	NA	NA
CAX49444.1_452	0	NA	NA	NA	NA	NA	NA	NA	NA
CAX49448.1_456	0	NA	NA	NA	NA	NA	NA	NA	NA
CAX49452.1_460	0	NA	NA	NA	NA	NA	NA	NA	NA
CAX49453.1_461	0	NA	NA	NA	NA	NA	NA	NA	NA
CAX49455.1_463	0	NA	NA	NA	NA	NA	NA	NA	NA
CAX49458.1_466	0	NA	NA	NA	NA	NA	NA	NA	NA
CAX49459.1_467	0	NA	NA	NA	NA	NA	NA	NA	NA
CAX49460.1_468	0	NA	NA	NA	NA	NA	NA	NA	NA
CAX49461.1_469	0	NA	NA	NA	NA	NA	NA	NA	NA
CAX49464.1_472	0	NA	NA	NA	NA	NA	NA	NA	NA
CAX49469.1_477	0	NA	NA	NA	NA	NA	NA	NA	NA
CAX49479.1_487	0	NA	NA	NA	NA	NA	NA	NA	NA
CAX49480.1_488	0	NA	NA	NA	NA	NA	NA	NA	NA
CAX49481.1_489	0	NA	NA	NA	NA	NA	NA	NA	NA
CAX49484.1_492	0	NA	NA	NA	NA	NA	NA	NA	NA
CAX49488.1_496	0	NA	NA	NA	NA	NA	NA	NA	NA
CAX49489.1_497	0	NA	NA	NA	NA	NA	NA	NA	NA
CAX49491.1_499	0	NA	NA	NA	NA	NA	NA	NA	NA
CAX49493.1_501	0	NA	NA	NA	NA	NA	NA	NA	NA
CAX49496.1_504	0	NA	NA	NA	NA	NA	NA	NA	NA
CAX49499.1_507	0	NA	NA	NA	NA	NA	NA	NA	NA
CAX49500.1_508	0	NA	NA	NA	NA	NA	NA	NA	NA
CAX49501.1_509	0	NA	NA	NA	NA	NA	NA	NA	NA
CAX49502.1_510	0	NA	NA	NA	NA	NA	NA	NA	NA
CAX49503.1_511	0	NA	NA	NA	NA	NA	NA	NA	NA
CAX49504.1_512	0	NA	NA	NA	NA	NA	NA	NA	NA
CAX49512.1_520	0	NA	NA	NA	NA	NA	NA	NA	NA
CAX49515.1_523	0	NA	NA	NA	NA	NA	NA	NA	NA
CAX49517.1_525	0	NA	NA	NA	NA	NA	NA	NA	NA
CAX49525.1_533	0	NA	NA	NA	NA	NA	NA	NA	NA
CAX49529.1_537	0	NA	NA	NA	NA	NA	NA	NA	NA
CAX49530.1_538	0	NA	NA	NA	NA	NA	NA	NA	NA
CAX49531.1_539	0	NA	NA	NA	NA	NA	NA	NA	NA
CAX49533.1_541	0	NA	NA	NA	NA	NA	NA	NA	NA
CAX49537.1_545	0	NA	NA	NA	NA	NA	NA	NA	NA
CAX49538.1_546	0	NA	NA	NA	NA	NA	NA	NA	NA
CAX49541.1_549	0	NA	NA	NA	NA	NA	NA	NA	NA
CAX49542.1_550	0	NA	NA	NA	NA	NA	NA	NA	NA
CAX49543.1_551	0	NA	NA	NA	NA	NA	NA	NA	NA
CAX49545.1_553	0	NA	NA	NA	NA	NA	NA	NA	NA
CAX49546.1_554	0	NA	NA	NA	NA	NA	NA	NA	NA
CAX49549.1_557	0	NA	NA	NA	NA	NA	NA	NA	NA
CAX49550.1_558	0	NA	NA	NA	NA	NA	NA	NA	NA
CAX49553.1_561	0	NA	NA	NA	NA	NA	NA	NA	NA
CAX49555.1_563	0	NA	NA	NA	NA	NA	NA	NA	NA
CAX49556.1_564	0	NA	NA	NA	NA	NA	NA	NA	NA
CAX49560.1_568	0	NA	NA	NA	NA	NA	NA	NA	NA
CAX49561.1_569	0	NA	NA	NA	NA	NA	NA	NA	NA
CAX49562.1_570	0	NA	NA	NA	NA	NA	NA	NA	NA
CAX49570.1_578	0	NA	NA	NA	NA	NA	NA	NA	NA
CAX49575.1_583	0	NA	NA	NA	NA	NA	NA	NA	NA
CAX49576.1_584	0	NA	NA	NA	NA	NA	NA	NA	NA
CAX49577.1_585	0	NA	NA	NA	NA	NA	NA	NA	NA
CAX49579.1_587	0	NA	NA	NA	NA	NA	NA	NA	NA
CAX49580.1_588	0	NA	NA	NA	NA	NA	NA	NA	NA
CAX49584.1_592	0	NA	NA	NA	NA	NA	NA	NA	NA
CAX49585.1_593	0	NA	NA	NA	NA	NA	NA	NA	NA
CAX49595.1_603	0	NA	NA	NA	NA	NA	NA	NA	NA
CAX49597.1_605	0	NA	NA	NA	NA	NA	NA	NA	NA
CAX49598.1_606	0	NA	NA	NA	NA	NA	NA	NA	NA
CAX49600.1_608	0	NA	NA	NA	NA	NA	NA	NA	NA
CAX49601.1_609	0	NA	NA	NA	NA	NA	NA	NA	NA
CAX49602.1_610	0	NA	NA	NA	NA	NA	NA	NA	NA
CAX49604.1_612	0	NA	NA	NA	NA	NA	NA	NA	NA
CAX49606.1_614	0	NA	NA	NA	NA	NA	NA	NA	NA
CAX49608.1_616	0	NA	NA	NA	NA	NA	NA	NA	NA
CAX49610.1_618	0	NA	NA	NA	NA	NA	NA	NA	NA
CAX49612.1_620	0	NA	NA	NA	NA	NA	NA	NA	NA
CAX49614.1_622	0	NA	NA	NA	NA	NA	NA	NA	NA
CAX49615.1_623	0	NA	NA	NA	NA	NA	NA	NA	NA
CAX49616.1_624	0	NA	NA	NA	NA	NA	NA	NA	NA
CAX49618.1_626	0	NA	NA	NA	NA	NA	NA	NA	NA
CAX49620.1_628	0	NA	NA	NA	NA	NA	NA	NA	NA
CAX49628.1_636	0	NA	NA	NA	NA	NA	NA	NA	NA
CAX49632.1_640	0	NA	NA	NA	NA	NA	NA	NA	NA
CAX49633.1_641	0	NA	NA	NA	NA	NA	NA	NA	NA
CAX49637.1_645	0	NA	NA	NA	NA	NA	NA	NA	NA
CAX49639.1_647	0	NA	NA	NA	NA	NA	NA	NA	NA
CAX49642.1_650	0	NA	NA	NA	NA	NA	NA	NA	NA
CAX49648.1_656	0	NA	NA	NA	NA	NA	NA	NA	NA
CAX49653.1_661	0	NA	NA	NA	NA	NA	NA	NA	NA
CAX49657.1_665	0	NA	NA	NA	NA	NA	NA	NA	NA
CAX49659.1_667	0	NA	NA	NA	NA	NA	NA	NA	NA
CAX49660.1_668	0	NA	NA	NA	NA	NA	NA	NA	NA
CAX49661.1_669	0	NA	NA	NA	NA	NA	NA	NA	NA
CAX49662.1_670	0	NA	NA	NA	NA	NA	NA	NA	NA
CAX49664.1_672	0	NA	NA	NA	NA	NA	NA	NA	NA
CAX49665.1_673	0	NA	NA	NA	NA	NA	NA	NA	NA
CAX49674.1_682	0	NA	NA	NA	NA	NA	NA	NA	NA
CAX49675.1_683	0	NA	NA	NA	NA	NA	NA	NA	NA
CAX49676.1_684	0	NA	NA	NA	NA	NA	NA	NA	NA
CAX49677.1_685	0	NA	NA	NA	NA	NA	NA	NA	NA
CAX49679.1_687	0	NA	NA	NA	NA	NA	NA	NA	NA
CAX49686.1_694	0	NA	NA	NA	NA	NA	NA	NA	NA
CAX49687.1_695	0	NA	NA	NA	NA	NA	NA	NA	NA
CAX49689.1_697	0	NA	NA	NA	NA	NA	NA	NA	NA
CAX49691.1_699	0	NA	NA	NA	NA	NA	NA	NA	NA
CAX49693.1_701	0	NA	NA	NA	NA	NA	NA	NA	NA
CAX49694.1_702	0	NA	NA	NA	NA	NA	NA	NA	NA
CAX49696.1_704	0	NA	NA	NA	NA	NA	NA	NA	NA
CAX49700.1_708	0	NA	NA	NA	NA	NA	NA	NA	NA
CAX49702.1_710	0	NA	NA	NA	NA	NA	NA	NA	NA
CAX49703.1_711	0	NA	NA	NA	NA	NA	NA	NA	NA
CAX49704.1_712	0	NA	NA	NA	NA	NA	NA	NA	NA
CAX49707.1_715	0	NA	NA	NA	NA	NA	NA	NA	NA
CAX49711.1_719	0	NA	NA	NA	NA	NA	NA	NA	NA
CAX49712.1_720	0	NA	NA	NA	NA	NA	NA	NA	NA
CAX49714.1_722	0	NA	NA	NA	NA	NA	NA	NA	NA
CAX49715.1_723	0	NA	NA	NA	NA	NA	NA	NA	NA
CAX49717.1_725	0	NA	NA	NA	NA	NA	NA	NA	NA
CAX49719.1_727	0	NA	NA	NA	NA	NA	NA	NA	NA
CAX49720.1_728	0	NA	NA	NA	NA	NA	NA	NA	NA
CAX49721.1_729	0	NA	NA	NA	NA	NA	NA	NA	NA
CAX49725.1_733	0	NA	NA	NA	NA	NA	NA	NA	NA
CAX49730.1_738	0	NA	NA	NA	NA	NA	NA	NA	NA
CAX49731.1_739	0	NA	NA	NA	NA	NA	NA	NA	NA
CAX49734.1_742	0	NA	NA	NA	NA	NA	NA	NA	NA
CAX49736.1_744	0	NA	NA	NA	NA	NA	NA	NA	NA
CAX49737.1_745	0	NA	NA	NA	NA	NA	NA	NA	NA
CAX49738.1_746	0	NA	NA	NA	NA	NA	NA	NA	NA
CAX49744.1_752	0	NA	NA	NA	NA	NA	NA	NA	NA
CAX49745.1_753	0	NA	NA	NA	NA	NA	NA	NA	NA
CAX49749.1_757	0	NA	NA	NA	NA	NA	NA	NA	NA
CAX49753.1_761	0	NA	NA	NA	NA	NA	NA	NA	NA
CAX49754.1_762	0	NA	NA	NA	NA	NA	NA	NA	NA
CAX49756.1_764	0	NA	NA	NA	NA	NA	NA	NA	NA
CAX49758.1_766	0	NA	NA	NA	NA	NA	NA	NA	NA
CAX49759.1_767	0	NA	NA	NA	NA	NA	NA	NA	NA
CAX49760.1_768	0	NA	NA	NA	NA	NA	NA	NA	NA
CAX49762.1_770	0	NA	NA	NA	NA	NA	NA	NA	NA
CAX49763.1_771	0	NA	NA	NA	NA	NA	NA	NA	NA
CAX49764.1_772	0	NA	NA	NA	NA	NA	NA	NA	NA
CAX49765.1_773	0	NA	NA	NA	NA	NA	NA	NA	NA
CAX49769.1_777	0	NA	NA	NA	NA	NA	NA	NA	NA
CAX49771.1_779	0	NA	NA	NA	NA	NA	NA	NA	NA
CAX49777.1_785	0	NA	NA	NA	NA	NA	NA	NA	NA
CAX49778.1_786	0	NA	NA	NA	NA	NA	NA	NA	NA
CAX49780.1_788	0	NA	NA	NA	NA	NA	NA	NA	NA
CAX49781.1_789	0	NA	NA	NA	NA	NA	NA	NA	NA
CAX49782.1_790	0	NA	NA	NA	NA	NA	NA	NA	NA
CAX49783.1_791	0	NA	NA	NA	NA	NA	NA	NA	NA
CAX49785.1_793	0	NA	NA	NA	NA	NA	NA	NA	NA
CAX49786.1_794	0	NA	NA	NA	NA	NA	NA	NA	NA
CAX49794.1_802	0	NA	NA	NA	NA	NA	NA	NA	NA
CAX49795.1_803	0	NA	NA	NA	NA	NA	NA	NA	NA
CAX49796.1_804	0	NA	NA	NA	NA	NA	NA	NA	NA
CAX49797.1_805	0	NA	NA	NA	NA	NA	NA	NA	NA
CAX49800.1_808	0	NA	NA	NA	NA	NA	NA	NA	NA
CAX49803.1_811	0	NA	NA	NA	NA	NA	NA	NA	NA
CAX49805.1_813	0	NA	NA	NA	NA	NA	NA	NA	NA
CAX49808.1_816	0	NA	NA	NA	NA	NA	NA	NA	NA
CAX49809.1_817	0	NA	NA	NA	NA	NA	NA	NA	NA
CAX49811.1_819	0	NA	NA	NA	NA	NA	NA	NA	NA
CAX49812.1_820	0	NA	NA	NA	NA	NA	NA	NA	NA
CAX49817.1_825	0	NA	NA	NA	NA	NA	NA	NA	NA
CAX49818.1_826	0	NA	NA	NA	NA	NA	NA	NA	NA
CAX49821.1_829	0	NA	NA	NA	NA	NA	NA	NA	NA
CAX49822.1_830	0	NA	NA	NA	NA	NA	NA	NA	NA
CAX49823.1_831	0	NA	NA	NA	NA	NA	NA	NA	NA
CAX49824.1_832	0	NA	NA	NA	NA	NA	NA	NA	NA
CAX49825.1_833	0	NA	NA	NA	NA	NA	NA	NA	NA
CAX49828.1_836	0	NA	NA	NA	NA	NA	NA	NA	NA
CAX49830.1_838	0	NA	NA	NA	NA	NA	NA	NA	NA
CAX49831.1_839	0	NA	NA	NA	NA	NA	NA	NA	NA
CAX49832.1_840	0	NA	NA	NA	NA	NA	NA	NA	NA
CAX49835.1_843	0	NA	NA	NA	NA	NA	NA	NA	NA
CAX49841.1_849	0	NA	NA	NA	NA	NA	NA	NA	NA
CAX49842.1_850	0	NA	NA	NA	NA	NA	NA	NA	NA
CAX49843.1_851	0	NA	NA	NA	NA	NA	NA	NA	NA
CAX49844.1_852	0	NA	NA	NA	NA	NA	NA	NA	NA
CAX49850.1_858	0	NA	NA	NA	NA	NA	NA	NA	NA
CAX49852.1_860	0	NA	NA	NA	NA	NA	NA	NA	NA
CAX49853.1_861	0	NA	NA	NA	NA	NA	NA	NA	NA
CAX49857.1_865	0	NA	NA	NA	NA	NA	NA	NA	NA
CAX49870.1_878	0	NA	NA	NA	NA	NA	NA	NA	NA
CAX49872.1_880	0	NA	NA	NA	NA	NA	NA	NA	NA
CAX49874.1_882	0	NA	NA	NA	NA	NA	NA	NA	NA
CAX49879.1_887	0	NA	NA	NA	NA	NA	NA	NA	NA
CAX49880.1_888	0	NA	NA	NA	NA	NA	NA	NA	NA
CAX49890.1_898	0	NA	NA	NA	NA	NA	NA	NA	NA
CAX49894.1_902	0	NA	NA	NA	NA	NA	NA	NA	NA
CAX49900.1_908	0	NA	NA	NA	NA	NA	NA	NA	NA
CAX49902.1_910	0	NA	NA	NA	NA	NA	NA	NA	NA
CAX49906.1_914	0	NA	NA	NA	NA	NA	NA	NA	NA
CAX49908.1_916	0	NA	NA	NA	NA	NA	NA	NA	NA
CAX49910.1_918	0	NA	NA	NA	NA	NA	NA	NA	NA
CAX49913.1_921	0	NA	NA	NA	NA	NA	NA	NA	NA
CAX49914.1_922	0	NA	NA	NA	NA	NA	NA	NA	NA
CAX49915.1_923	0	NA	NA	NA	NA	NA	NA	NA	NA
CAX49916.1_924	0	NA	NA	NA	NA	NA	NA	NA	NA
CAX49920.1_928	0	NA	NA	NA	NA	NA	NA	NA	NA
CAX49925.1_933	0	NA	NA	NA	NA	NA	NA	NA	NA
CAX49927.1_935	0	NA	NA	NA	NA	NA	NA	NA	NA
CAX49929.1_937	0	NA	NA	NA	NA	NA	NA	NA	NA
CAX49932.1_940	0	NA	NA	NA	NA	NA	NA	NA	NA
CAX49935.1_943	0	NA	NA	NA	NA	NA	NA	NA	NA
CAX49940.1_948	0	NA	NA	NA	NA	NA	NA	NA	NA
CAX49943.1_951	0	NA	NA	NA	NA	NA	NA	NA	NA
CAX49945.1_953	0	NA	NA	NA	NA	NA	NA	NA	NA
CAX49946.1_954	0	NA	NA	NA	NA	NA	NA	NA	NA
CAX49948.1_956	0	NA	NA	NA	NA	NA	NA	NA	NA
CAX49949.1_957	0	NA	NA	NA	NA	NA	NA	NA	NA
CAX49952.1_960	0	NA	NA	NA	NA	NA	NA	NA	NA
CAX49965.1_973	0	NA	NA	NA	NA	NA	NA	NA	NA
CAX49966.1_974	0	NA	NA	NA	NA	NA	NA	NA	NA
CAX49967.1_975	0	NA	NA	NA	NA	NA	NA	NA	NA
CAX49969.1_977	0	NA	NA	NA	NA	NA	NA	NA	NA
CAX49970.1_978	0	NA	NA	NA	NA	NA	NA	NA	NA
CAX49975.1_983	0	NA	NA	NA	NA	NA	NA	NA	NA
CAX49977.1_985	0	NA	NA	NA	NA	NA	NA	NA	NA
CAX49980.1_988	0	NA	NA	NA	NA	NA	NA	NA	NA
CAX49982.1_990	0	NA	NA	NA	NA	NA	NA	NA	NA
CAX49984.1_992	0	NA	NA	NA	NA	NA	NA	NA	NA
CAX49987.1_995	0	NA	NA	NA	NA	NA	NA	NA	NA
CAX49988.1_996	0	NA	NA	NA	NA	NA	NA	NA	NA
CAX49989.1_997	0	NA	NA	NA	NA	NA	NA	NA	NA
CAX49993.1_1001	0	NA	NA	NA	NA	NA	NA	NA	NA
CAX49996.1_1004	0	NA	NA	NA	NA	NA	NA	NA	NA
CAX50003.1_1011	0	NA	NA	NA	NA	NA	NA	NA	NA
CAX50006.1_1014	0	NA	NA	NA	NA	NA	NA	NA	NA
CAX50007.1_1015	0	NA	NA	NA	NA	NA	NA	NA	NA
CAX50011.1_1019	0	NA	NA	NA	NA	NA	NA	NA	NA
CAX50013.1_1021	0	NA	NA	NA	NA	NA	NA	NA	NA
CAX50016.1_1024	0	NA	NA	NA	NA	NA	NA	NA	NA
CAX50018.1_1026	0	NA	NA	NA	NA	NA	NA	NA	NA
CAX50019.1_1027	0	NA	NA	NA	NA	NA	NA	NA	NA
CAX50020.1_1028	0	NA	NA	NA	NA	NA	NA	NA	NA
CAX50022.1_1030	0	NA	NA	NA	NA	NA	NA	NA	NA
CAX50024.1_1032	0	NA	NA	NA	NA	NA	NA	NA	NA
CAX50026.1_1034	0	NA	NA	NA	NA	NA	NA	NA	NA
CAX50027.1_1035	0	NA	NA	NA	NA	NA	NA	NA	NA
CAX50028.1_1036	0	NA	NA	NA	NA	NA	NA	NA	NA
CAX50037.1_1045	0	NA	NA	NA	NA	NA	NA	NA	NA
CAX50040.1_1048	0	NA	NA	NA	NA	NA	NA	NA	NA
CAX50041.1_1049	0	NA	NA	NA	NA	NA	NA	NA	NA
CAX50044.1_1052	0	NA	NA	NA	NA	NA	NA	NA	NA
CAX50047.1_1055	0	NA	NA	NA	NA	NA	NA	NA	NA
CAX50050.1_1058	0	NA	NA	NA	NA	NA	NA	NA	NA
CAX50051.1_1059	0	NA	NA	NA	NA	NA	NA	NA	NA
CAX50052.1_1060	0	NA	NA	NA	NA	NA	NA	NA	NA
CAX50053.1_1061	0	NA	NA	NA	NA	NA	NA	NA	NA
CAX50054.1_1062	0	NA	NA	NA	NA	NA	NA	NA	NA
CAX50056.1_1064	0	NA	NA	NA	NA	NA	NA	NA	NA
CAX50057.1_1065	0	NA	NA	NA	NA	NA	NA	NA	NA
CAX50060.1_1068	0	NA	NA	NA	NA	NA	NA	NA	NA
CAX50062.1_1070	0	NA	NA	NA	NA	NA	NA	NA	NA
CAX50064.1_1072	0	NA	NA	NA	NA	NA	NA	NA	NA
CAX50071.1_1079	0	NA	NA	NA	NA	NA	NA	NA	NA
CAX50073.1_1081	0	NA	NA	NA	NA	NA	NA	NA	NA
CAX50074.1_1082	0	NA	NA	NA	NA	NA	NA	NA	NA
CAX50080.1_1088	0	NA	NA	NA	NA	NA	NA	NA	NA
CAX50081.1_1089	0	NA	NA	NA	NA	NA	NA	NA	NA
CAX50085.1_1093	0	NA	NA	NA	NA	NA	NA	NA	NA
CAX50086.1_1094	0	NA	NA	NA	NA	NA	NA	NA	NA
CAX50095.1_1103	0	NA	NA	NA	NA	NA	NA	NA	NA
CAX50098.1_1106	0	NA	NA	NA	NA	NA	NA	NA	NA
CAX50099.1_1107	0	NA	NA	NA	NA	NA	NA	NA	NA
CAX50100.1_1108	0	NA	NA	NA	NA	NA	NA	NA	NA
CAX50101.1_1109	0	NA	NA	NA	NA	NA	NA	NA	NA
CAX50103.1_1111	0	NA	NA	NA	NA	NA	NA	NA	NA
CAX50105.1_1113	0	NA	NA	NA	NA	NA	NA	NA	NA
CAX50109.1_1117	0	NA	NA	NA	NA	NA	NA	NA	NA
CAX50111.1_1119	0	NA	NA	NA	NA	NA	NA	NA	NA
CAX50112.1_1120	0	NA	NA	NA	NA	NA	NA	NA	NA
CAX50115.1_1123	0	NA	NA	NA	NA	NA	NA	NA	NA
CAX50116.1_1124	0	NA	NA	NA	NA	NA	NA	NA	NA
CAX50120.1_1128	0	NA	NA	NA	NA	NA	NA	NA	NA
CAX50122.1_1130	0	NA	NA	NA	NA	NA	NA	NA	NA
CAX50124.1_1132	0	NA	NA	NA	NA	NA	NA	NA	NA
CAX50125.1_1133	0	NA	NA	NA	NA	NA	NA	NA	NA
CAX50129.1_1137	0	NA	NA	NA	NA	NA	NA	NA	NA
CAX50130.1_1138	0	NA	NA	NA	NA	NA	NA	NA	NA
CAX50131.1_1139	0	NA	NA	NA	NA	NA	NA	NA	NA
CAX50132.1_1140	0	NA	NA	NA	NA	NA	NA	NA	NA
CAX50135.1_1143	0	NA	NA	NA	NA	NA	NA	NA	NA
CAX50136.1_1144	0	NA	NA	NA	NA	NA	NA	NA	NA
CAX50137.1_1145	0	NA	NA	NA	NA	NA	NA	NA	NA
CAX50138.1_1146	0	NA	NA	NA	NA	NA	NA	NA	NA
CAX50139.1_1147	0	NA	NA	NA	NA	NA	NA	NA	NA
CAX50140.1_1148	0	NA	NA	NA	NA	NA	NA	NA	NA
CAX50141.1_1149	0	NA	NA	NA	NA	NA	NA	NA	NA
CAX50142.1_1150	0	NA	NA	NA	NA	NA	NA	NA	NA
CAX50145.1_1153	0	NA	NA	NA	NA	NA	NA	NA	NA
CAX50146.1_1154	0	NA	NA	NA	NA	NA	NA	NA	NA
CAX50147.1_1155	0	NA	NA	NA	NA	NA	NA	NA	NA
CAX50148.1_1156	0	NA	NA	NA	NA	NA	NA	NA	NA
CAX50149.1_1157	0	NA	NA	NA	NA	NA	NA	NA	NA
CAX50151.1_1159	0	NA	NA	NA	NA	NA	NA	NA	NA
CAX50152.1_1160	0	NA	NA	NA	NA	NA	NA	NA	NA
CAX50154.1_1162	0	NA	NA	NA	NA	NA	NA	NA	NA
CAX50155.1_1163	0	NA	NA	NA	NA	NA	NA	NA	NA
CAX50156.1_1164	0	NA	NA	NA	NA	NA	NA	NA	NA
CAX50157.1_1165	0	NA	NA	NA	NA	NA	NA	NA	NA
CAX50158.1_1166	0	NA	NA	NA	NA	NA	NA	NA	NA
CAX50160.1_1168	0	NA	NA	NA	NA	NA	NA	NA	NA
CAX50162.1_1170	0	NA	NA	NA	NA	NA	NA	NA	NA
CAX50163.1_1171	0	NA	NA	NA	NA	NA	NA	NA	NA
CAX50168.1_1176	0	NA	NA	NA	NA	NA	NA	NA	NA
CAX50172.1_1180	0	NA	NA	NA	NA	NA	NA	NA	NA
CAX50173.1_1181	0	NA	NA	NA	NA	NA	NA	NA	NA
CAX50174.1_1182	0	NA	NA	NA	NA	NA	NA	NA	NA
CAX50175.1_1183	0	NA	NA	NA	NA	NA	NA	NA	NA
CAX50176.1_1184	0	NA	NA	NA	NA	NA	NA	NA	NA
CAX50177.1_1185	0	NA	NA	NA	NA	NA	NA	NA	NA
CAX50178.1_1186	0	NA	NA	NA	NA	NA	NA	NA	NA
CAX50180.1_1188	0	NA	NA	NA	NA	NA	NA	NA	NA
CAX50190.1_1198	0	NA	NA	NA	NA	NA	NA	NA	NA
CAX50192.1_1200	0	NA	NA	NA	NA	NA	NA	NA	NA
CAX50194.1_1202	0	NA	NA	NA	NA	NA	NA	NA	NA
CAX50196.1_1204	0	NA	NA	NA	NA	NA	NA	NA	NA
CAX50197.1_1205	0	NA	NA	NA	NA	NA	NA	NA	NA
CAX50198.1_1206	0	NA	NA	NA	NA	NA	NA	NA	NA
CAX50199.1_1207	0	NA	NA	NA	NA	NA	NA	NA	NA
CAX50200.1_1208	0	NA	NA	NA	NA	NA	NA	NA	NA
CAX50202.1_1210	0	NA	NA	NA	NA	NA	NA	NA	NA
CAX50203.1_1211	0	NA	NA	NA	NA	NA	NA	NA	NA
CAX50204.1_1212	0	NA	NA	NA	NA	NA	NA	NA	NA
CAX50205.1_1213	0	NA	NA	NA	NA	NA	NA	NA	NA
CAX50206.1_1214	0	NA	NA	NA	NA	NA	NA	NA	NA
CAX50210.1_1218	0	NA	NA	NA	NA	NA	NA	NA	NA
CAX50211.1_1219	0	NA	NA	NA	NA	NA	NA	NA	NA
CAX50212.1_1220	0	NA	NA	NA	NA	NA	NA	NA	NA
CAX50214.1_1222	0	NA	NA	NA	NA	NA	NA	NA	NA
CAX50215.1_1223	0	NA	NA	NA	NA	NA	NA	NA	NA
CAX50219.1_1227	0	NA	NA	NA	NA	NA	NA	NA	NA
CAX50224.1_1232	0	NA	NA	NA	NA	NA	NA	NA	NA
CAX50226.1_1234	0	NA	NA	NA	NA	NA	NA	NA	NA
CAX50227.1_1235	0	NA	NA	NA	NA	NA	NA	NA	NA
CAX50228.1_1236	0	NA	NA	NA	NA	NA	NA	NA	NA
CAX50229.1_1237	0	NA	NA	NA	NA	NA	NA	NA	NA
CAX50230.1_1238	0	NA	NA	NA	NA	NA	NA	NA	NA
CAX50231.1_1239	0	NA	NA	NA	NA	NA	NA	NA	NA
CAX50233.1_1241	0	NA	NA	NA	NA	NA	NA	NA	NA
CAX50234.1_1242	0	NA	NA	NA	NA	NA	NA	NA	NA
CAX50235.1_1243	0	NA	NA	NA	NA	NA	NA	NA	NA
CAX50236.1_1244	0	NA	NA	NA	NA	NA	NA	NA	NA
CAX50238.1_1246	0	NA	NA	NA	NA	NA	NA	NA	NA
CAX50239.1_1247	0	NA	NA	NA	NA	NA	NA	NA	NA
CAX50242.1_1250	0	NA	NA	NA	NA	NA	NA	NA	NA
CAX50249.1_1257	0	NA	NA	NA	NA	NA	NA	NA	NA
CAX50250.1_1258	0	NA	NA	NA	NA	NA	NA	NA	NA
CAX50251.1_1259	0	NA	NA	NA	NA	NA	NA	NA	NA
CAX50252.1_1260	0	NA	NA	NA	NA	NA	NA	NA	NA
CAX50253.1_1261	0	NA	NA	NA	NA	NA	NA	NA	NA
CAX50259.1_1267	0	NA	NA	NA	NA	NA	NA	NA	NA
CAX50265.1_1273	0	NA	NA	NA	NA	NA	NA	NA	NA
CAX50268.1_1276	0	NA	NA	NA	NA	NA	NA	NA	NA
CAX50273.1_1281	0	NA	NA	NA	NA	NA	NA	NA	NA
CAX50286.1_1294	0	NA	NA	NA	NA	NA	NA	NA	NA
CAX50288.1_1296	0	NA	NA	NA	NA	NA	NA	NA	NA
CAX50289.1_1297	0	NA	NA	NA	NA	NA	NA	NA	NA
CAX50291.1_1299	0	NA	NA	NA	NA	NA	NA	NA	NA
CAX50292.1_1300	0	NA	NA	NA	NA	NA	NA	NA	NA
CAX50296.1_1304	0	NA	NA	NA	NA	NA	NA	NA	NA
CAX50297.1_1305	0	NA	NA	NA	NA	NA	NA	NA	NA
CAX50302.1_1310	0	NA	NA	NA	NA	NA	NA	NA	NA
CAX50303.1_1311	0	NA	NA	NA	NA	NA	NA	NA	NA
CAX50305.1_1313	0	NA	NA	NA	NA	NA	NA	NA	NA
CAX50308.1_1316	0	NA	NA	NA	NA	NA	NA	NA	NA
CAX50313.1_1321	0	NA	NA	NA	NA	NA	NA	NA	NA
CAX50314.1_1322	0	NA	NA	NA	NA	NA	NA	NA	NA
CAX50315.1_1323	0	NA	NA	NA	NA	NA	NA	NA	NA
CAX50316.1_1324	0	NA	NA	NA	NA	NA	NA	NA	NA
CAX50326.1_1334	0	NA	NA	NA	NA	NA	NA	NA	NA
CAX50327.1_1335	0	NA	NA	NA	NA	NA	NA	NA	NA
CAX50328.1_1336	0	NA	NA	NA	NA	NA	NA	NA	NA
CAX50333.1_1341	0	NA	NA	NA	NA	NA	NA	NA	NA
CAX50334.1_1342	0	NA	NA	NA	NA	NA	NA	NA	NA
CAX50335.1_1343	0	NA	NA	NA	NA	NA	NA	NA	NA
CAX50336.1_1344	0	NA	NA	NA	NA	NA	NA	NA	NA
CAX50337.1_1345	0	NA	NA	NA	NA	NA	NA	NA	NA
CAX50341.1_1349	0	NA	NA	NA	NA	NA	NA	NA	NA
CAX50346.1_1354	0	NA	NA	NA	NA	NA	NA	NA	NA
CAX50347.1_1355	0	NA	NA	NA	NA	NA	NA	NA	NA
CAX50349.1_1357	0	NA	NA	NA	NA	NA	NA	NA	NA
CAX50350.1_1358	0	NA	NA	NA	NA	NA	NA	NA	NA
CAX50351.1_1359	0	NA	NA	NA	NA	NA	NA	NA	NA
CAX50355.1_1363	0	NA	NA	NA	NA	NA	NA	NA	NA
CAX50356.1_1364	0	NA	NA	NA	NA	NA	NA	NA	NA
CAX50357.1_1365	0	NA	NA	NA	NA	NA	NA	NA	NA
CAX50358.1_1366	0	NA	NA	NA	NA	NA	NA	NA	NA
CAX50359.1_1367	0	NA	NA	NA	NA	NA	NA	NA	NA
CAX50360.1_1368	0	NA	NA	NA	NA	NA	NA	NA	NA
CAX50361.1_1369	0	NA	NA	NA	NA	NA	NA	NA	NA
CAX50362.1_1370	0	NA	NA	NA	NA	NA	NA	NA	NA
CAX50365.1_1373	0	NA	NA	NA	NA	NA	NA	NA	NA
CAX50366.1_1374	0	NA	NA	NA	NA	NA	NA	NA	NA
CAX50367.1_1375	0	NA	NA	NA	NA	NA	NA	NA	NA
CAX50368.1_1376	0	NA	NA	NA	NA	NA	NA	NA	NA
CAX50369.1_1377	0	NA	NA	NA	NA	NA	NA	NA	NA
CAX50370.1_1378	0	NA	NA	NA	NA	NA	NA	NA	NA
CAX50371.1_1379	0	NA	NA	NA	NA	NA	NA	NA	NA
CAX50374.1_1382	0	NA	NA	NA	NA	NA	NA	NA	NA
CAX50376.1_1384	0	NA	NA	NA	NA	NA	NA	NA	NA
CAX50380.1_1388	0	NA	NA	NA	NA	NA	NA	NA	NA
CAX50385.1_1393	0	NA	NA	NA	NA	NA	NA	NA	NA
CAX50386.1_1394	0	NA	NA	NA	NA	NA	NA	NA	NA
CAX50388.1_1396	0	NA	NA	NA	NA	NA	NA	NA	NA
CAX50389.1_1397	0	NA	NA	NA	NA	NA	NA	NA	NA
CAX50390.1_1398	0	NA	NA	NA	NA	NA	NA	NA	NA
CAX50402.1_1410	0	NA	NA	NA	NA	NA	NA	NA	NA
CAX50404.1_1412	0	NA	NA	NA	NA	NA	NA	NA	NA
CAX50405.1_1413	0	NA	NA	NA	NA	NA	NA	NA	NA
CAX50406.1_1414	0	NA	NA	NA	NA	NA	NA	NA	NA
CAX50407.1_1415	0	NA	NA	NA	NA	NA	NA	NA	NA
CAX50408.1_1416	0	NA	NA	NA	NA	NA	NA	NA	NA
CAX50412.1_1420	0	NA	NA	NA	NA	NA	NA	NA	NA
CAX50417.1_1425	0	NA	NA	NA	NA	NA	NA	NA	NA
CAX50420.1_1428	0	NA	NA	NA	NA	NA	NA	NA	NA
CAX50421.1_1429	0	NA	NA	NA	NA	NA	NA	NA	NA
CAX50429.1_1437	0	NA	NA	NA	NA	NA	NA	NA	NA
CAX50434.1_1442	0	NA	NA	NA	NA	NA	NA	NA	NA
CAX50435.1_1443	0	NA	NA	NA	NA	NA	NA	NA	NA
CAX50436.1_1444	0	NA	NA	NA	NA	NA	NA	NA	NA
CAX50437.1_1445	0	NA	NA	NA	NA	NA	NA	NA	NA
CAX50442.1_1450	0	NA	NA	NA	NA	NA	NA	NA	NA
CAX50443.1_1451	0	NA	NA	NA	NA	NA	NA	NA	NA
CAX50445.1_1453	0	NA	NA	NA	NA	NA	NA	NA	NA
CAX50447.1_1455	0	NA	NA	NA	NA	NA	NA	NA	NA
CAX50450.1_1458	0	NA	NA	NA	NA	NA	NA	NA	NA
CAX50452.1_1460	0	NA	NA	NA	NA	NA	NA	NA	NA
CAX50453.1_1461	0	NA	NA	NA	NA	NA	NA	NA	NA
CAX50456.1_1464	0	NA	NA	NA	NA	NA	NA	NA	NA
CAX50459.1_1467	0	NA	NA	NA	NA	NA	NA	NA	NA
CAX50463.1_1471	0	NA	NA	NA	NA	NA	NA	NA	NA
CAX50464.1_1472	0	NA	NA	NA	NA	NA	NA	NA	NA
CAX50465.1_1473	0	NA	NA	NA	NA	NA	NA	NA	NA
CAX50466.1_1474	0	NA	NA	NA	NA	NA	NA	NA	NA
CAX50469.1_1477	0	NA	NA	NA	NA	NA	NA	NA	NA
CAX50471.1_1479	0	NA	NA	NA	NA	NA	NA	NA	NA
CAX50472.1_1480	0	NA	NA	NA	NA	NA	NA	NA	NA
CAX50474.1_1482	0	NA	NA	NA	NA	NA	NA	NA	NA
CAX50478.1_1486	0	NA	NA	NA	NA	NA	NA	NA	NA
CAX50481.1_1489	0	NA	NA	NA	NA	NA	NA	NA	NA
CAX50482.1_1490	0	NA	NA	NA	NA	NA	NA	NA	NA
CAX50483.1_1491	0	NA	NA	NA	NA	NA	NA	NA	NA
CAX50486.1_1494	0	NA	NA	NA	NA	NA	NA	NA	NA
CAX50487.1_1495	0	NA	NA	NA	NA	NA	NA	NA	NA
CAX50494.1_1502	0	NA	NA	NA	NA	NA	NA	NA	NA
CAX50495.1_1503	0	NA	NA	NA	NA	NA	NA	NA	NA
CAX50500.1_1508	0	NA	NA	NA	NA	NA	NA	NA	NA
CAX50502.1_1510	0	NA	NA	NA	NA	NA	NA	NA	NA
CAX50503.1_1511	0	NA	NA	NA	NA	NA	NA	NA	NA
CAX50504.1_1512	0	NA	NA	NA	NA	NA	NA	NA	NA
CAX50505.1_1513	0	NA	NA	NA	NA	NA	NA	NA	NA
CAX50506.1_1514	0	NA	NA	NA	NA	NA	NA	NA	NA
CAX50511.1_1519	0	NA	NA	NA	NA	NA	NA	NA	NA
CAX50512.1_1520	0	NA	NA	NA	NA	NA	NA	NA	NA
CAX50517.1_1525	0	NA	NA	NA	NA	NA	NA	NA	NA
CAX50518.1_1526	0	NA	NA	NA	NA	NA	NA	NA	NA
CAX50520.1_1528	0	NA	NA	NA	NA	NA	NA	NA	NA
CAX50521.1_1529	0	NA	NA	NA	NA	NA	NA	NA	NA
CAX50524.1_1532	0	NA	NA	NA	NA	NA	NA	NA	NA
CAX50527.1_1535	0	NA	NA	NA	NA	NA	NA	NA	NA
CAX50532.1_1540	0	NA	NA	NA	NA	NA	NA	NA	NA
CAX50535.1_1543	0	NA	NA	NA	NA	NA	NA	NA	NA
CAX50536.1_1544	0	NA	NA	NA	NA	NA	NA	NA	NA
CAX50539.1_1547	0	NA	NA	NA	NA	NA	NA	NA	NA
CAX50540.1_1548	0	NA	NA	NA	NA	NA	NA	NA	NA
CAX50543.1_1551	0	NA	NA	NA	NA	NA	NA	NA	NA
CAX50545.1_1553	0	NA	NA	NA	NA	NA	NA	NA	NA
CAX50546.1_1554	0	NA	NA	NA	NA	NA	NA	NA	NA
CAX50548.1_1556	0	NA	NA	NA	NA	NA	NA	NA	NA
CAX50550.1_1558	0	NA	NA	NA	NA	NA	NA	NA	NA
CAX50551.1_1559	0	NA	NA	NA	NA	NA	NA	NA	NA
CAX50552.1_1560	0	NA	NA	NA	NA	NA	NA	NA	NA
CAX50553.1_1561	0	NA	NA	NA	NA	NA	NA	NA	NA
CAX50554.1_1562	0	NA	NA	NA	NA	NA	NA	NA	NA
CAX50555.1_1563	0	NA	NA	NA	NA	NA	NA	NA	NA
CAX50556.1_1564	0	NA	NA	NA	NA	NA	NA	NA	NA
CAX50557.1_1565	0	NA	NA	NA	NA	NA	NA	NA	NA
CAX50558.1_1566	0	NA	NA	NA	NA	NA	NA	NA	NA
CAX50559.1_1567	0	NA	NA	NA	NA	NA	NA	NA	NA
CAX50561.1_1569	0	NA	NA	NA	NA	NA	NA	NA	NA
CAX50562.1_1570	0	NA	NA	NA	NA	NA	NA	NA	NA
CAX50563.1_1571	0	NA	NA	NA	NA	NA	NA	NA	NA
CAX50565.1_1573	0	NA	NA	NA	NA	NA	NA	NA	NA
CAX50566.1_1574	0	NA	NA	NA	NA	NA	NA	NA	NA
CAX50567.1_1575	0	NA	NA	NA	NA	NA	NA	NA	NA
CAX50568.1_1576	0	NA	NA	NA	NA	NA	NA	NA	NA
CAX50570.1_1578	0	NA	NA	NA	NA	NA	NA	NA	NA
CAX50572.1_1580	0	NA	NA	NA	NA	NA	NA	NA	NA
CAX50573.1_1581	0	NA	NA	NA	NA	NA	NA	NA	NA
CAX50574.1_1582	0	NA	NA	NA	NA	NA	NA	NA	NA
CAX50575.1_1583	0	NA	NA	NA	NA	NA	NA	NA	NA
CAX50577.1_1585	0	NA	NA	NA	NA	NA	NA	NA	NA
CAX50579.1_1587	0	NA	NA	NA	NA	NA	NA	NA	NA
CAX50583.1_1591	0	NA	NA	NA	NA	NA	NA	NA	NA
CAX50586.1_1594	0	NA	NA	NA	NA	NA	NA	NA	NA
CAX50597.1_1605	0	NA	NA	NA	NA	NA	NA	NA	NA
CAX50598.1_1606	0	NA	NA	NA	NA	NA	NA	NA	NA
CAX50599.1_1607	0	NA	NA	NA	NA	NA	NA	NA	NA
CAX50608.1_1616	0	NA	NA	NA	NA	NA	NA	NA	NA
CAX50616.1_1624	0	NA	NA	NA	NA	NA	NA	NA	NA
CAX50621.1_1629	0	NA	NA	NA	NA	NA	NA	NA	NA
CAX50623.1_1631	0	NA	NA	NA	NA	NA	NA	NA	NA
CAX50624.1_1632	0	NA	NA	NA	NA	NA	NA	NA	NA
CAX50625.1_1633	0	NA	NA	NA	NA	NA	NA	NA	NA
CAX50627.1_1635	0	NA	NA	NA	NA	NA	NA	NA	NA
CAX50628.1_1636	0	NA	NA	NA	NA	NA	NA	NA	NA
CAX50630.1_1638	0	NA	NA	NA	NA	NA	NA	NA	NA
CAX50633.1_1641	0	NA	NA	NA	NA	NA	NA	NA	NA
CAX50635.1_1643	0	NA	NA	NA	NA	NA	NA	NA	NA
CAX50636.1_1644	0	NA	NA	NA	NA	NA	NA	NA	NA
CAX50639.1_1647	0	NA	NA	NA	NA	NA	NA	NA	NA
CAX50643.1_1651	0	NA	NA	NA	NA	NA	NA	NA	NA
CAX50650.1_1658	0	NA	NA	NA	NA	NA	NA	NA	NA
CAX50654.1_1662	0	NA	NA	NA	NA	NA	NA	NA	NA
CAX50667.1_1675	0	NA	NA	NA	NA	NA	NA	NA	NA
CAX50669.1_1677	0	NA	NA	NA	NA	NA	NA	NA	NA
CAX50670.1_1678	0	NA	NA	NA	NA	NA	NA	NA	NA
CAX50675.1_1683	0	NA	NA	NA	NA	NA	NA	NA	NA
CAX50676.1_1684	0	NA	NA	NA	NA	NA	NA	NA	NA
CAX50678.1_1686	0	NA	NA	NA	NA	NA	NA	NA	NA
CAX50679.1_1687	0	NA	NA	NA	NA	NA	NA	NA	NA
CAX50681.1_1689	0	NA	NA	NA	NA	NA	NA	NA	NA
CAX50684.1_1692	0	NA	NA	NA	NA	NA	NA	NA	NA
CAX50685.1_1693	0	NA	NA	NA	NA	NA	NA	NA	NA
CAX50688.1_1696	0	NA	NA	NA	NA	NA	NA	NA	NA
CAX50689.1_1697	0	NA	NA	NA	NA	NA	NA	NA	NA
CAX50692.1_1700	0	NA	NA	NA	NA	NA	NA	NA	NA
CAX50694.1_1702	0	NA	NA	NA	NA	NA	NA	NA	NA
CAX50698.1_1706	0	NA	NA	NA	NA	NA	NA	NA	NA
CAX50700.1_1708	0	NA	NA	NA	NA	NA	NA	NA	NA
CAX50702.1_1710	0	NA	NA	NA	NA	NA	NA	NA	NA
CAX50704.1_1712	0	NA	NA	NA	NA	NA	NA	NA	NA
CAX50706.1_1714	0	NA	NA	NA	NA	NA	NA	NA	NA
CAX50707.1_1715	0	NA	NA	NA	NA	NA	NA	NA	NA
CAX50713.1_1721	0	NA	NA	NA	NA	NA	NA	NA	NA
CAX50714.1_1722	0	NA	NA	NA	NA	NA	NA	NA	NA
CAX50717.1_1725	0	NA	NA	NA	NA	NA	NA	NA	NA
CAX50722.1_1730	0	NA	NA	NA	NA	NA	NA	NA	NA
CAX50725.1_1733	0	NA	NA	NA	NA	NA	NA	NA	NA
CAX50731.1_1739	0	NA	NA	NA	NA	NA	NA	NA	NA
CAX50735.1_1743	0	NA	NA	NA	NA	NA	NA	NA	NA
CAX50741.1_1749	0	NA	NA	NA	NA	NA	NA	NA	NA
CAX50743.1_1751	0	NA	NA	NA	NA	NA	NA	NA	NA
CAX50744.1_1752	0	NA	NA	NA	NA	NA	NA	NA	NA
CAX50751.1_1759	0	NA	NA	NA	NA	NA	NA	NA	NA
CAX50754.1_1762	0	NA	NA	NA	NA	NA	NA	NA	NA
CAX50755.1_1763	0	NA	NA	NA	NA	NA	NA	NA	NA
CAX50757.1_1765	0	NA	NA	NA	NA	NA	NA	NA	NA
CAX50758.1_1766	0	NA	NA	NA	NA	NA	NA	NA	NA
CAX50759.1_1767	0	NA	NA	NA	NA	NA	NA	NA	NA
CAX50760.1_1768	0	NA	NA	NA	NA	NA	NA	NA	NA
CAX50761.1_1769	0	NA	NA	NA	NA	NA	NA	NA	NA
CAX50762.1_1770	0	NA	NA	NA	NA	NA	NA	NA	NA
CAX50766.1_1774	0	NA	NA	NA	NA	NA	NA	NA	NA
CAX50767.1_1775	0	NA	NA	NA	NA	NA	NA	NA	NA
CAX50768.1_1776	0	NA	NA	NA	NA	NA	NA	NA	NA
CAX50770.1_1778	0	NA	NA	NA	NA	NA	NA	NA	NA
CAX50774.1_1782	0	NA	NA	NA	NA	NA	NA	NA	NA
CAX50776.1_1784	0	NA	NA	NA	NA	NA	NA	NA	NA
CAX50790.1_1798	0	NA	NA	NA	NA	NA	NA	NA	NA
CAX50793.1_1801	0	NA	NA	NA	NA	NA	NA	NA	NA
CAX50795.1_1803	0	NA	NA	NA	NA	NA	NA	NA	NA
CAX50799.1_1807	0	NA	NA	NA	NA	NA	NA	NA	NA
CAX50801.1_1809	0	NA	NA	NA	NA	NA	NA	NA	NA
CAX50806.1_1814	0	NA	NA	NA	NA	NA	NA	NA	NA
CAX50807.1_1815	0	NA	NA	NA	NA	NA	NA	NA	NA
CAX50808.1_1816	0	NA	NA	NA	NA	NA	NA	NA	NA
CAX50809.1_1817	0	NA	NA	NA	NA	NA	NA	NA	NA
CAX50810.1_1818	0	NA	NA	NA	NA	NA	NA	NA	NA
CAX50814.1_1822	0	NA	NA	NA	NA	NA	NA	NA	NA
CAX50826.1_1834	0	NA	NA	NA	NA	NA	NA	NA	NA
CAX50828.1_1836	0	NA	NA	NA	NA	NA	NA	NA	NA
CAX50829.1_1837	0	NA	NA	NA	NA	NA	NA	NA	NA
CAX50830.1_1838	0	NA	NA	NA	NA	NA	NA	NA	NA
CAX50831.1_1839	0	NA	NA	NA	NA	NA	NA	NA	NA
CAX50833.1_1841	0	NA	NA	NA	NA	NA	NA	NA	NA
CAX50834.1_1842	0	NA	NA	NA	NA	NA	NA	NA	NA
CAX50835.1_1843	0	NA	NA	NA	NA	NA	NA	NA	NA
CAX50836.1_1844	0	NA	NA	NA	NA	NA	NA	NA	NA
CAX50837.1_1845	0	NA	NA	NA	NA	NA	NA	NA	NA
CAX50838.1_1846	0	NA	NA	NA	NA	NA	NA	NA	NA
CAX50839.1_1847	0	NA	NA	NA	NA	NA	NA	NA	NA
CAX50841.1_1849	0	NA	NA	NA	NA	NA	NA	NA	NA
CAX50843.1_1851	0	NA	NA	NA	NA	NA	NA	NA	NA
CAX50849.1_1857	0	NA	NA	NA	NA	NA	NA	NA	NA
CAX50857.1_1865	0	NA	NA	NA	NA	NA	NA	NA	NA
CAX50861.1_1869	0	NA	NA	NA	NA	NA	NA	NA	NA
CAX50863.1_1871	0	NA	NA	NA	NA	NA	NA	NA	NA
CAX50864.1_1872	0	NA	NA	NA	NA	NA	NA	NA	NA
CAX50866.1_1874	0	NA	NA	NA	NA	NA	NA	NA	NA
CAX50869.1_1877	0	NA	NA	NA	NA	NA	NA	NA	NA
CAX50871.1_1879	0	NA	NA	NA	NA	NA	NA	NA	NA
CAX50877.1_1885	0	NA	NA	NA	NA	NA	NA	NA	NA
CAX50880.1_1888	0	NA	NA	NA	NA	NA	NA	NA	NA
CAX50882.1_1890	0	NA	NA	NA	NA	NA	NA	NA	NA
CAX50883.1_1891	0	NA	NA	NA	NA	NA	NA	NA	NA
CAX50884.1_1892	0	NA	NA	NA	NA	NA	NA	NA	NA
CAX50885.1_1893	0	NA	NA	NA	NA	NA	NA	NA	NA
CAX50887.1_1895	0	NA	NA	NA	NA	NA	NA	NA	NA
CAX50893.1_1901	0	NA	NA	NA	NA	NA	NA	NA	NA
CAX50897.1_1905	0	NA	NA	NA	NA	NA	NA	NA	NA
CAX50898.1_1906	0	NA	NA	NA	NA	NA	NA	NA	NA
CAX50899.1_1907	0	NA	NA	NA	NA	NA	NA	NA	NA
CAX50904.1_1912	0	NA	NA	NA	NA	NA	NA	NA	NA
CAX50909.1_1917	0	NA	NA	NA	NA	NA	NA	NA	NA
CAX50914.1_1922	0	NA	NA	NA	NA	NA	NA	NA	NA
CAX50915.1_1923	0	NA	NA	NA	NA	NA	NA	NA	NA
CAX50916.1_1924	0	NA	NA	NA	NA	NA	NA	NA	NA
CAX50917.1_1925	0	NA	NA	NA	NA	NA	NA	NA	NA
CAX50918.1_1926	0	NA	NA	NA	NA	NA	NA	NA	NA
CAX50919.1_1927	0	NA	NA	NA	NA	NA	NA	NA	NA
CAX50923.1_1931	0	NA	NA	NA	NA	NA	NA	NA	NA
CAX50925.1_1933	0	NA	NA	NA	NA	NA	NA	NA	NA
CAX50930.1_1938	0	NA	NA	NA	NA	NA	NA	NA	NA
CAX50931.1_1939	0	NA	NA	NA	NA	NA	NA	NA	NA
CAX50939.1_1947	0	NA	NA	NA	NA	NA	NA	NA	NA
CAX50940.1_1948	0	NA	NA	NA	NA	NA	NA	NA	NA
CAX50942.1_1950	0	NA	NA	NA	NA	NA	NA	NA	NA
CAX50945.1_1953	0	NA	NA	NA	NA	NA	NA	NA	NA
CAX50946.1_1954	0	NA	NA	NA	NA	NA	NA	NA	NA
CAX50947.1_1955	0	NA	NA	NA	NA	NA	NA	NA	NA
CAX50948.1_1956	0	NA	NA	NA	NA	NA	NA	NA	NA
CAX50951.1_1959	0	NA	NA	NA	NA	NA	NA	NA	NA
CAX50953.1_1961	0	NA	NA	NA	NA	NA	NA	NA	NA
CAX50959.1_1967	0	NA	NA	NA	NA	NA	NA	NA	NA
CAX50961.1_1969	0	NA	NA	NA	NA	NA	NA	NA	NA
CAX50962.1_1970	0	NA	NA	NA	NA	NA	NA	NA	NA
CAX50964.1_1972	0	NA	NA	NA	NA	NA	NA	NA	NA
CAX50965.1_1973	0	NA	NA	NA	NA	NA	NA	NA	NA
CAX50973.1_1981	0	NA	NA	NA	NA	NA	NA	NA	NA
CAX50977.1_1985	0	NA	NA	NA	NA	NA	NA	NA	NA
CAX50978.1_1986	0	NA	NA	NA	NA	NA	NA	NA	NA
CAX50979.1_1987	0	NA	NA	NA	NA	NA	NA	NA	NA
CAX50982.1_1990	0	NA	NA	NA	NA	NA	NA	NA	NA
CAX50986.1_1994	0	NA	NA	NA	NA	NA	NA	NA	NA
CAX50991.1_1999	0	NA	NA	NA	NA	NA	NA	NA	NA
CAX50995.1_2003	0	NA	NA	NA	NA	NA	NA	NA	NA
CAX50996.1_2004	0	NA	NA	NA	NA	NA	NA	NA	NA
CAX50998.1_2006	0	NA	NA	NA	NA	NA	NA	NA	NA
CAX51000.1_2008	0	NA	NA	NA	NA	NA	NA	NA	NA
CAX51002.1_2010	0	NA	NA	NA	NA	NA	NA	NA	NA
CAX51003.1_2011	0	NA	NA	NA	NA	NA	NA	NA	NA
CAX51004.1_2012	0	NA	NA	NA	NA	NA	NA	NA	NA
CAX51006.1_2014	0	NA	NA	NA	NA	NA	NA	NA	NA
CAX51009.1_2017	0	NA	NA	NA	NA	NA	NA	NA	NA
CAX51010.1_2018	0	NA	NA	NA	NA	NA	NA	NA	NA
CAX51011.1_2019	0	NA	NA	NA	NA	NA	NA	NA	NA
CAX51014.1_2022	0	NA	NA	NA	NA	NA	NA	NA	NA
CAX51018.1_2026	0	NA	NA	NA	NA	NA	NA	NA	NA
CAX51019.1_2027	0	NA	NA	NA	NA	NA	NA	NA	NA
CAX51020.1_2028	0	NA	NA	NA	NA	NA	NA	NA	NA
CAX51023.1_2031	0	NA	NA	NA	NA	NA	NA	NA	NA
CAX51027.1_2035	0	NA	NA	NA	NA	NA	NA	NA	NA
CAX51028.1_2036	0	NA	NA	NA	NA	NA	NA	NA	NA
CAX51030.1_2038	0	NA	NA	NA	NA	NA	NA	NA	NA
CAX51033.1_2041	0	NA	NA	NA	NA	NA	NA	NA	NA
CAX51034.1_2042	0	NA	NA	NA	NA	NA	NA	NA	NA
CAX51037.1_2045	0	NA	NA	NA	NA	NA	NA	NA	NA
CAX51039.1_2047	0	NA	NA	NA	NA	NA	NA	NA	NA
CAX51040.1_2048	0	NA	NA	NA	NA	NA	NA	NA	NA
CAX51045.1_2053	0	NA	NA	NA	NA	NA	NA	NA	NA
CAX51048.1_2056	0	NA	NA	NA	NA	NA	NA	NA	NA
CAX51049.1_2057	0	NA	NA	NA	NA	NA	NA	NA	NA
CAX51051.1_2059	0	NA	NA	NA	NA	NA	NA	NA	NA
CAX51052.1_2060	0	NA	NA	NA	NA	NA	NA	NA	NA
CAX51055.1_2063	0	NA	NA	NA	NA	NA	NA	NA	NA
CAX51057.1_2065	0	NA	NA	NA	NA	NA	NA	NA	NA
CAX51058.1_2066	0	NA	NA	NA	NA	NA	NA	NA	NA
CAX51059.1_2067	0	NA	NA	NA	NA	NA	NA	NA	NA
CAX51064.1_2072	0	NA	NA	NA	NA	NA	NA	NA	NA
CAX51065.1_2073	0	NA	NA	NA	NA	NA	NA	NA	NA
CAX51067.1_2075	0	NA	NA	NA	NA	NA	NA	NA	NA
CAX51068.1_2076	0	NA	NA	NA	NA	NA	NA	NA	NA
CAX51070.1_2078	0	NA	NA	NA	NA	NA	NA	NA	NA
CAX51072.1_2080	0	NA	NA	NA	NA	NA	NA	NA	NA
CAX51075.1_2083	0	NA	NA	NA	NA	NA	NA	NA	NA
CAX51078.1_2086	0	NA	NA	NA	NA	NA	NA	NA	NA
CAX51080.1_2088	0	NA	NA	NA	NA	NA	NA	NA	NA
CAX51082.1_2090	0	NA	NA	NA	NA	NA	NA	NA	NA
CAX51083.1_2091	0	NA	NA	NA	NA	NA	NA	NA	NA
CAX51085.1_2093	0	NA	NA	NA	NA	NA	NA	NA	NA
CAX51086.1_2094	0	NA	NA	NA	NA	NA	NA	NA	NA
CAX51088.1_2096	0	NA	NA	NA	NA	NA	NA	NA	NA
CAX51089.1_2097	0	NA	NA	NA	NA	NA	NA	NA	NA
CAX51092.1_2100	0	NA	NA	NA	NA	NA	NA	NA	NA
CAX51093.1_2101	0	NA	NA	NA	NA	NA	NA	NA	NA
CAX51095.1_2103	0	NA	NA	NA	NA	NA	NA	NA	NA
CAX51096.1_2104	0	NA	NA	NA	NA	NA	NA	NA	NA
CAX51101.1_2109	0	NA	NA	NA	NA	NA	NA	NA	NA
CAX51103.1_2111	0	NA	NA	NA	NA	NA	NA	NA	NA
CAX51104.1_2112	0	NA	NA	NA	NA	NA	NA	NA	NA
CAX51105.1_2113	0	NA	NA	NA	NA	NA	NA	NA	NA
CAX51106.1_2114	0	NA	NA	NA	NA	NA	NA	NA	NA
CAX51108.1_2116	0	NA	NA	NA	NA	NA	NA	NA	NA
CAX51110.1_2118	0	NA	NA	NA	NA	NA	NA	NA	NA
CAX51114.1_2122	0	NA	NA	NA	NA	NA	NA	NA	NA
CAX51116.1_2124	0	NA	NA	NA	NA	NA	NA	NA	NA
CAX51118.1_2126	0	NA	NA	NA	NA	NA	NA	NA	NA
CAX49027.1_35	0	NA	NA	NA	NA	NA	NA	NA	NA
CAX49049.1_57	0	NA	NA	NA	NA	NA	NA	NA	NA
CAX49050.1_58	0	NA	NA	NA	NA	NA	NA	NA	NA
CAX49079.1_87	0	NA	NA	NA	NA	NA	NA	NA	NA
CAX49088.1_96	0	NA	NA	NA	NA	NA	NA	NA	NA
CAX49125.1_133	0	NA	NA	NA	NA	NA	NA	NA	NA
CAX49127.1_135	0	NA	NA	NA	NA	NA	NA	NA	NA
CAX49128.1_136	0	NA	NA	NA	NA	NA	NA	NA	NA
CAX49129.1_137	0	NA	NA	NA	NA	NA	NA	NA	NA
CAX49130.1_138	0	NA	NA	NA	NA	NA	NA	NA	NA
CAX49131.1_139	0	NA	NA	NA	NA	NA	NA	NA	NA
CAX49132.1_140	0	NA	NA	NA	NA	NA	NA	NA	NA
CAX49133.1_141	0	NA	NA	NA	NA	NA	NA	NA	NA
CAX49234.1_242	0	NA	NA	NA	NA	NA	NA	NA	NA
CAX49258.1_266	0	NA	NA	NA	NA	NA	NA	NA	NA
CAX49277.1_285	0	NA	NA	NA	NA	NA	NA	NA	NA
CAX49278.1_286	0	NA	NA	NA	NA	NA	NA	NA	NA
CAX49375.1_383	0	NA	NA	NA	NA	NA	NA	NA	NA
CAX49376.1_384	0	NA	NA	NA	NA	NA	NA	NA	NA
CAX49472.1_480	0	NA	NA	NA	NA	NA	NA	NA	NA
CAX49482.1_490	0	NA	NA	NA	NA	NA	NA	NA	NA
CAX49483.1_491	0	NA	NA	NA	NA	NA	NA	NA	NA
CAX49494.1_502	0	NA	NA	NA	NA	NA	NA	NA	NA
CAX49498.1_506	0	NA	NA	NA	NA	NA	NA	NA	NA
CAX49514.1_522	0	NA	NA	NA	NA	NA	NA	NA	NA
CAX49520.1_528	0	NA	NA	NA	NA	NA	NA	NA	NA
CAX49522.1_530	0	NA	NA	NA	NA	NA	NA	NA	NA
CAX49523.1_531	0	NA	NA	NA	NA	NA	NA	NA	NA
CAX49651.1_659	0	NA	NA	NA	NA	NA	NA	NA	NA
CAX49666.1_674	0	NA	NA	NA	NA	NA	NA	NA	NA
CAX49699.1_707	0	NA	NA	NA	NA	NA	NA	NA	NA
CAX49701.1_709	0	NA	NA	NA	NA	NA	NA	NA	NA
CAX49750.1_758	0	NA	NA	NA	NA	NA	NA	NA	NA
CAX49855.1_863	0	NA	NA	NA	NA	NA	NA	NA	NA
CAX49856.1_864	0	NA	NA	NA	NA	NA	NA	NA	NA
CAX49863.1_871	0	NA	NA	NA	NA	NA	NA	NA	NA
CAX49933.1_941	0	NA	NA	NA	NA	NA	NA	NA	NA
CAX50065.1_1073	0	NA	NA	NA	NA	NA	NA	NA	NA
CAX50144.1_1152	0	NA	NA	NA	NA	NA	NA	NA	NA
CAX50150.1_1158	0	NA	NA	NA	NA	NA	NA	NA	NA
CAX50153.1_1161	0	NA	NA	NA	NA	NA	NA	NA	NA
CAX50164.1_1172	0	NA	NA	NA	NA	NA	NA	NA	NA
CAX50264.1_1272	0	NA	NA	NA	NA	NA	NA	NA	NA
CAX50310.1_1318	0	NA	NA	NA	NA	NA	NA	NA	NA
CAX50318.1_1326	0	NA	NA	NA	NA	NA	NA	NA	NA
CAX50319.1_1327	0	NA	NA	NA	NA	NA	NA	NA	NA
CAX50320.1_1328	0	NA	NA	NA	NA	NA	NA	NA	NA
CAX50321.1_1329	0	NA	NA	NA	NA	NA	NA	NA	NA
CAX50322.1_1330	0	NA	NA	NA	NA	NA	NA	NA	NA
CAX50323.1_1331	0	NA	NA	NA	NA	NA	NA	NA	NA
CAX50325.1_1333	0	NA	NA	NA	NA	NA	NA	NA	NA
CAX50363.1_1371	0	NA	NA	NA	NA	NA	NA	NA	NA
CAX50364.1_1372	0	NA	NA	NA	NA	NA	NA	NA	NA
CAX50576.1_1584	0	NA	NA	NA	NA	NA	NA	NA	NA
CAX50637.1_1645	0	NA	NA	NA	NA	NA	NA	NA	NA
CAX50638.1_1646	0	NA	NA	NA	NA	NA	NA	NA	NA
CAX50705.1_1713	0	NA	NA	NA	NA	NA	NA	NA	NA
CAX50708.1_1716	0	NA	NA	NA	NA	NA	NA	NA	NA
CAX50710.1_1718	0	NA	NA	NA	NA	NA	NA	NA	NA
CAX50712.1_1720	0	NA	NA	NA	NA	NA	NA	NA	NA
CAX50716.1_1724	0	NA	NA	NA	NA	NA	NA	NA	NA
CAX50720.1_1728	0	NA	NA	NA	NA	NA	NA	NA	NA
CAX50721.1_1729	0	NA	NA	NA	NA	NA	NA	NA	NA
CAX50739.1_1747	0	NA	NA	NA	NA	NA	NA	NA	NA
CAX50740.1_1748	0	NA	NA	NA	NA	NA	NA	NA	NA
CAX50742.1_1750	0	NA	NA	NA	NA	NA	NA	NA	NA
CAX50769.1_1777	0	NA	NA	NA	NA	NA	NA	NA	NA
CAX50775.1_1783	0	NA	NA	NA	NA	NA	NA	NA	NA
CAX50784.1_1792	0	NA	NA	NA	NA	NA	NA	NA	NA
CAX50785.1_1793	0	NA	NA	NA	NA	NA	NA	NA	NA
CAX50786.1_1794	0	NA	NA	NA	NA	NA	NA	NA	NA
CAX50787.1_1795	0	NA	NA	NA	NA	NA	NA	NA	NA
CAX50956.1_1964	0	NA	NA	NA	NA	NA	NA	NA	NA
CAX51025.1_2033	0	NA	NA	NA	NA	NA	NA	NA	NA
CAX51032.1_2040	0	NA	NA	NA	NA	NA	NA	NA	NA

## Sheet: Table S4
Table S4. Number of NTS/NTS-like elements and presence of homologs of ssnA in the NCBI Refseq Reference/Representative Genome Database
							ssnA Homolog Present
Genome	Assembly level	Species	CheckM completeness (%)	Genome Length (bp)	NTS elements present (n)	NTS-like elements present (n)	Any homolog (tblastn E < 1e-10)	Homolog with AA identity > 60%	cd10448: GIY-YIG_unchar_3 homolog (psiblast E < 1e-10)	cd10448: GIY-YIG_unchar_3 homolog (psiblast E < 1e-10) and CDD score > 100
GCF_918308855.1_Rickettsia_endosymbiont_of_Ceutorhynchus_assimilis	Chromosome	Rickettsia endosymbiont of Ceutorhynchus assimilis	98.26	4063491	95	608	YES	NO	YES	YES
GCF_014202975.1_ASM1420297v1	Scaffold	Povalibacter uvarum	96.41	6321800	159	578	YES	YES	YES	YES
GCF_024211255.1_ASM2421125v1	Contig	Sphingomonas liriopis	99.45	3555040	16	577	YES	YES	YES	YES
GCF_002355975.1_ASM235597v1	Complete Genome	Lysobacter enzymogenes	86.78	6096022	79	528	YES	YES	YES	YES
GCF_001613345.1_ASM161334v1	Contig	Nocardia uniformis NBRC 13702	97.64	8766665	0	502	NO	NO	NO	NO
GCF_007859325.1_ASM785932v1	Contig	Luteimonas marina	89.59	3910508	56	483	YES	YES	YES	YES
GCF_011762125.1_ASM1176212v1	Contig	Sphingopyxis panaciterrae	93.04	4842500	8	463	YES	NO	YES	YES
GCF_947251615.1_icApoCory1.Wolbachia_sp_1.1	Complete Genome	Wolbachia endosymbiont (group A) of Apoderus coryli	98.12	1535196	0	451	YES	NO	YES	YES
GCF_009755585.1_ASM975558v1	Complete Genome	Lysobacter soli	90.92	4109802	87	434	YES	YES	YES	YES
GCF_008330805.1_ASM833080v1	Complete Genome	Neisseria meningitidis	98.86	2157444	446	432	YES	YES	YES	YES
GCF_014642835.1_ASM1464283v1	Scaffold	Dyella nitratireducens	99.02	5681128	56	419	YES	NO	YES	YES
GCF_022664435.1_ASM2266443v1	Scaffold	Sphingomonas panni	98.49	4151858	74	409	YES	NO	YES	YES
GCF_947251545.1_idAnoPurm1.Wolbachia_sp_1.1	Complete Genome	Wolbachia endosymbiont (group A) of Anomoia purmunda	98.73	1485790	0	402	YES	NO	YES	YES
GCF_000308815.1_ASM30881v1	Contig	Nocardia concava NBRC 100430	96.7	8933351	0	394	NO	NO	NO	NO
GCF_030159855.1_ASM3015985v1	Scaffold	Devosia yakushimensis	99.34	4634527	84	394	YES	NO	YES	YES
GCF_025452235.1_ASM2545223v1	Complete Genome	Devosia neptuniae	96.29	4715470	0	378	YES	NO	YES	YES
GCF_027924565.1_ASM2792456v1	Complete Genome	Lysobacter auxotrophicus	92.03	4155451	31	376	YES	NO	YES	YES
GCF_947251555.1_iyMacEuro1.Wolbachia_sp_1.1	Complete Genome	Wolbachia endosymbiont (group A) of Macropis europaea	98.73	1439111	0	376	YES	NO	YES	YES
GCF_022664465.1_ASM2266446v1	Scaffold	Sphingomonas hankookensis	98.59	3977879	43	365	YES	NO	YES	YES
GCF_000371765.1_ASM37176v1	Contig	Sphingomonas melonis C3	97.97	3929644	75	362	YES	YES	YES	YES
GCF_022760365.1_ASM2276036v1	Contig	Sphingomonas aquatilis	98.73	3749585	77	360	YES	YES	YES	YES
GCF_003590945.1_ASM359094v1	Contig	Oleomonas cavernae	85.45	5643452	0	359	YES	YES	YES	YES
GCF_017607425.1_ASM1760742v1	Complete Genome	Rhizorhabdus wittichii	99.3	6073182	140	358	YES	YES	YES	YES
GCF_000743575.1_ASM74357v1	Contig	Devosia riboflavina	98.45	5052234	0	357	YES	NO	YES	YES
GCF_022229225.1_ASM2222922v1	Contig	Ectothiorhodospira lacustris	90.62	3281322	194	353	YES	YES	YES	YES
GCF_001675775.1_ASM167577v1	Contig	Wolbachia endosymbiont of Nomada panzeri	98	1344355	0	350	YES	NO	YES	YES
GCF_001675785.1_ASM167578v1	Scaffold	Wolbachia endosymbiont of Nomada ferruginata	98	1337641	0	346	YES	NO	YES	YES
GCF_947250715.1_ioSymStri1.Wolbachia_sp_1.1	Complete Genome	Wolbachia endosymbiont (group A) of Sympetrum striolatum	98	1516596	0	340	YES	NO	YES	YES
GCF_001675695.1_ASM167569v1	Contig	Wolbachia endosymbiont of Nomada flava	98	1332780	0	336	YES	NO	YES	YES
GCF_000764535.1_ASM76453v1	Complete Genome	Sphingomonas taxi	99.53	4061902	0	335	YES	YES	YES	YES
GCF_001675715.1_ASM167571v1	Contig	Wolbachia endosymbiont of Nomada leucophthalma	98	1366719	0	335	YES	NO	YES	YES
GCF_023374055.1_ASM2337405v1	Contig	Luteimonas galliterrae	80.63	3599217	98	335	YES	YES	YES	YES
GCF_003932505.1_ASM393250v1	Contig	Thiohalobacter thiocyanaticus	91.91	3299615	79	331	YES	YES	YES	YES
GCF_947251425.1_idProAzur1.Wolbachia_sp_1.1	Complete Genome	Wolbachia endosymbiont (group A) of Protocalliphora azurea	99.09	1434285	0	330	YES	NO	YES	YES
GCF_947251565.1_ilPheGnom1.Wolbachia_sp_1.1	Complete Genome	Wolbachia endosymbiont (group A) of Pheosia gnoma	99.09	1353731	0	329	YES	NO	YES	YES
GCF_000969415.1_ASM96941v1	Contig	Devosia geojensis	98.72	4465063	0	328	YES	NO	YES	YES
GCF_007995065.1_ASM799506v1	Contig	Sphingomonas ginsenosidivorax	98.86	4135604	4	325	YES	YES	YES	YES
GCF_947179415.1_idPlaAlba1.Wolbachia_sp_1.1	Contig	Wolbachia endosymbiont (group A) of Platycheirus albimanus	98.36	1174337	0	323	YES	NO	YES	YES
GCF_000427645.1_ASM42764v1	Scaffold	Sphingomonas phyllosphaerae FA2	99.21	3920299	131	322	YES	YES	YES	YES
GCF_947251955.1_idCorMarg1.Wolbachia_sp_1.1	Complete Genome	Wolbachia endosymbiont (group A) of Coremacera marginata	99.09	1387347	0	321	YES	NO	YES	YES
GCF_900453685.1_51670_B01	Contig	Neisseria dentiae	98.04	2813772	142	315	YES	YES	YES	YES
GCF_947251895.1_idBomMajo1.Wolbachia_sp_1.1	Complete Genome	Wolbachia endosymbiont (group A) of Bombylius major	99.09	1556586	0	313	YES	NO	YES	YES
GCF_003234965.1_ASM323496v1	Contig	Aestuariivirga litoralis	99.05	4231275	0	310	YES	NO	YES	YES
GCF_030160295.1_ASM3016029v1	Scaffold	Dyella acidisoli	99.4	5344344	188	310	YES	YES	YES	YES
GCF_001442805.1_ASM144280v1	Complete Genome	Lysobacter gummosus	87.18	6056618	268	308	YES	YES	YES	YES
GCF_947250735.1_idSphTaen1.Wolbachia_sp_1.1	Complete Genome	Wolbachia endosymbiont (group A) of Sphaerophoria taeniata	98	1354582	0	304	YES	NO	YES	YES
GCF_947250775.1_icRhiConi1.Wolbachia_sp_1.1	Complete Genome	Wolbachia endosymbiont (group A) of Rhinocyllus conicus	98	1703908	0	304	YES	NO	YES	YES
GCF_002770725.1_ASM277072v1	Contig	Pleomorphomonas carboxyditropha	93.85	5888031	0	303	YES	NO	YES	YES
GCF_947179545.1_iySphEphi1.Wolbachia_sp_1.1	Contig	Wolbachia endosymbiont (group A) of Sphecodes ephippius	98.36	1317045	0	298	YES	NO	YES	YES
GCF_007745435.1_ASM774543v1	Chromosome	Calycomorphotria hydatis	97.94	5163473	157	297	YES	YES	YES	YES
GCF_947250565.1_iyAndHaem1.Wolbachia_sp_1.1	Complete Genome	Wolbachia endosymbiont (group A) of Andrena haemorrhoa	99.09	1494005	0	297	YES	NO	YES	YES
GCF_947250795.1_iyNomFabr1.Wolbachia_sp_1.1	Complete Genome	Wolbachia endosymbiont (group A) of Nomada fabriciana	99.09	1438975	0	294	YES	NO	YES	YES
GCF_000970465.2_ASM97046v2	Contig	Devosia insulae DS-56	98.57	5750119	28	291	YES	YES	YES	YES
GCF_022014495.1_ASM2201449v1	Scaffold	Sandaracinobacteroides sayramensis	99.05	3821644	0	287	NO	NO	NO	NO
GCF_027922365.1_ASM2792236v1	Scaffold	Pseudomonas turukhanskensis	99.04	5883329	77	287	YES	YES	YES	YES
GCF_947251595.1_ilEupTrip1.Wolbachia_sp_1.1	Complete Genome	Wolbachia endosymbiont (group A) of Eupithecia tripunctaria	98.73	1478719	0	285	YES	NO	YES	YES
GCF_947179405.1_iyLasMala1.Wolbachia_sp_2.1	Contig	Wolbachia endosymbiont (group A) of Lasioglossum malachurum	99.09	1363507	0	284	YES	NO	YES	YES
GCF_947251945.1_iyLasLatv2.Wolbachia_sp_1.1	Complete Genome	Wolbachia endosymbiont (group A) of Lasioglossum lativentre	99.09	1306351	0	284	YES	NO	YES	YES
GCF_019880585.1_ASM1988058v1	Contig	Sphingomonas colocasiae	95.38	6569909	52	281	YES	YES	YES	YES
GCF_947251665.1_iyTryClav1.Wolbachia_sp_1.1	Complete Genome	Wolbachia endosymbiont (group A) of Trypoxylon clavicerum	97.45	1287268	0	281	YES	NO	YES	NO
GCF_016722765.1_ASM1672276v1	Contig	Ramlibacter alkalitolerans	99.16	5712197	142	278	YES	YES	YES	YES
GCF_018467115.1_ASM1846711v1	Complete Genome	Wolbachia endosymbiont of Drosophila yakuba	99.09	1394392	0	278	YES	NO	YES	YES
GCF_018467135.1_ASM1846713v1	Complete Genome	Wolbachia endosymbiont of Drosophila santomea	99.09	1409094	0	278	YES	NO	YES	YES
GCF_002795245.1_ASM279524v1	Scaffold	Bradyrhizobium forestalis	99.91	8252029	0	275	YES	NO	YES	YES
GCF_016031645.1_ASM1603164v1	Contig	Wolbachia endosymbiont of Kradibia gibbosae	97.64	1448975	0	275	NO	NO	NO	NO
GCF_024804185.1_ASM2480418v1	Complete Genome	Wolbachia endosymbiont of Aedes albopictus	99.09	1226577	0	275	YES	NO	YES	YES
GCF_947250585.1_iyLasMori1.Wolbachia_sp_1.1	Complete Genome	Wolbachia endosymbiont (group A) of Lasioglossum morio	98.73	1282687	0	274	YES	NO	YES	YES
GCF_947250625.1_idCheSoro1.Wolbachia_sp_1.1	Complete Genome	Wolbachia endosymbiont (group A) of Cheilosia soror	99.45	1368130	0	274	NO	NO	NO	NO
GCF_016584425.1_ASM1658442v1	Complete Genome	Wolbachia endosymbiont of Drosophila melanogaster	99.09	1267783	0	271	YES	NO	YES	YES
GCF_011068405.5_ASM1106840v5	Complete Genome	Bradyrhizobium barranii subsp. barranii	99.52	11474152	0	270	YES	NO	YES	YES
GCF_017896245.1_ASM1789624v1	Complete Genome	Wolbachia endosymbiont of Aedes aegypti	99.09	1267786	0	270	YES	NO	YES	YES
GCF_947251935.1_ilCalPalu1.Wolbachia_sp_1.1	Complete Genome	Wolbachia endosymbiont (group A) of Calamotropha paludella	99.45	1594315	0	270	NO	NO	NO	NO
GCF_014107475.1_ASM1410747v1	Chromosome	Wolbachia pipientis	99.45	1185354	0	267	YES	NO	YES	YES
GCF_947179175.1_idVolInfl1.Wolbachia_sp_2.1	Contig	Wolbachia endosymbiont (group A) of Volucella inflata	99.45	1346192	0	267	NO	NO	NO	NO
GCF_002762215.1_ASM276221v1	Complete Genome	Piscinibacter gummiphilus	100	6398100	0	266	NO	NO	NO	NO
GCF_947250805.1_ilEndFlam1.Wolbachia_sp_1.1	Complete Genome	Wolbachia endosymbiont (group A) of Endotricha flammealis	99.09	1691858	0	266	NO	NO	NO	NO
GCF_947251675.1_idMerWest1.Wolbachia_sp_1.1	Complete Genome	Wolbachia endosymbiont (group A) of Merzomyia westermanni	98.73	1295457	0	266	YES	NO	YES	YES
GCF_947251765.1_iyAndDors1.Wolbachia_sp_1.1	Complete Genome	Wolbachia endosymbiont (group A) of Andrena dorsata	98	1366844	0	265	YES	NO	YES	YES
GCF_947250505.1_ilPhaBuce1.Wolbachia_sp_1.1	Complete Genome	Wolbachia endosymbiont (group A) of Phalera bucephala	98.36	1271809	0	264	YES	NO	YES	YES
GCF_003633955.1_ASM363395v1	Contig	Oceanibaculum indicum	99.56	3853825	0	262	YES	YES	YES	YES
GCF_947251435.1_idEpiGros1.Wolbachia_sp_2.1	Complete Genome	Wolbachia endosymbiont (group A) of Epistrophe grossularia	99.09	1367569	0	262	NO	NO	NO	NO
GCF_011516645.4_ASM1151664v4	Complete Genome	Bradyrhizobium septentrionale	99.36	10410654	0	261	YES	NO	YES	YES
GCF_947251635.1_ihIcePurc2.Wolbachia_sp_1.1	Complete Genome	Wolbachia endosymbiont (group A) of Icerya purchasi	98.73	1372034	0	261	NO	NO	NO	NO
GCF_000376605.1_ASM37660v1	Complete Genome	Wolbachia endosymbiont of Drosophila simulans wHa	99.45	1295804	0	259	NO	NO	NO	NO
GCF_947251965.1_iySphMoni1.Wolbachia_sp_2.1	Complete Genome	Wolbachia endosymbiont (group A) of Sphecodes monilicornis	98.73	1141922	0	259	NO	NO	NO	NO
GCF_002300525.1_ASM230052v1	Scaffold	Wolbachia endosymbiont of Drosophila subpulchrella	99.09	1420341	0	258	YES	NO	YES	YES
GCF_003063455.1_ASM306345v1	Contig	Limnohabitans parvus II-B4	95.94	2972530	3	254	YES	NO	YES	YES
GCF_006542295.1_ASM654229v1	Complete Genome	Wolbachia endosymbiont of Carposina sasakii	99.09	1449344	0	254	NO	NO	NO	NO
GCF_014641735.1_ASM1464173v1	Contig	Sphingomonas metalli	98.69	3855782	17	254	YES	YES	YES	YES
GCF_004571025.1_ASM457102v1	Contig	Bradyrhizobium niftali	99.41	9787683	0	253	YES	NO	YES	YES
GCF_000333795.1_ASM33379v2	Contig	Wolbachia endosymbiont str. valsugana of Drosophila suzukii	99.09	1415350	0	252	YES	NO	YES	YES
GCF_002091475.1_ASM209147v1	Contig	Sphingomonas azotifigens NBRC 15497	98.78	5145744	41	252	YES	YES	YES	YES
GCF_008033215.1_ASM803321v1	Complete Genome	Wolbachia endosymbiont of Drosophila ananassae	99.09	1401460	0	252	YES	NO	YES	YES
GCF_001758565.1_ASM175856v1	Chromosome	Wolbachia endosymbiont of Drosophila incompta	82.17	1267840	0	251	YES	NO	YES	YES
GCF_017869285.1_ASM1786928v1	Complete Genome	Wolbachia endosymbiont of Wiebesia pumilae	98.36	1278697	0	250	YES	NO	YES	YES
GCF_021378375.1_ASM2137837v1	Complete Genome	Wolbachia endosymbiont of Drosophila innubila	98.36	1290587	0	249	YES	NO	YES	YES
GCF_004570865.1_ASM457086v1	Contig	Bradyrhizobium frederickii	99.41	8294086	1	248	YES	NO	YES	YES
GCF_028981925.1_ASM2898192v1	Scaffold	Wolbachia endosymbiont of Drosophila burlai	98.73	1248003	0	248	YES	NO	YES	YES
GCF_947250765.1_idGymRotn1.Wolbachia_sp_1.1	Complete Genome	Wolbachia endosymbiont (group A) of Gymnosoma rotundatum	98.36	1431527	0	248	YES	NO	YES	YES
GCF_008932115.1_ASM893211v1	Complete Genome	Bradyrhizobium betae	99.07	7419402	1	247	YES	NO	YES	YES
GCF_947250785.1_iyAncNigr1.Wolbachia_sp_1.1	Complete Genome	Wolbachia endosymbiont (group A) of Ancistrocerus nigricornis	99.09	1265149	0	247	YES	NO	YES	YES
GCF_947251725.1_iyTipFemo1.Wolbachia_sp_1.1	Complete Genome	Wolbachia endosymbiont (group A) of Tiphia femorata	97.27	1330165	0	247	YES	NO	YES	YES
GCF_014354315.1_ASM1435431v1	Scaffold	Wolbachia endosymbiont of Drosophila sechellia	94.24	1294885	0	246	NO	NO	NO	NO
GCF_005862135.1_ASM586213v1	Scaffold	Wolbachia endosymbiont of Drosophila teissieri	99.09	1301330	0	245	YES	NO	YES	YES
GCF_028981865.1_ASM2898186v1	Scaffold	Wolbachia endosymbiont of Drosophila nikananu	98.36	1257108	0	243	YES	NO	YES	YES
GCF_003056355.1_ASM305635v1	Scaffold	Devosia naphthalenivorans	98.86	4488200	4	242	YES	NO	YES	YES
GCF_020618775.1_ASM2061877v1	Contig	Acidisoma silvae	99.12	5436125	2	241	YES	NO	YES	YES
GCF_009012935.1_ASM901293v1	Scaffold	Wolbachia endosymbiont of Nasonia oneida	96.18	1293406	0	240	NO	NO	YES	YES
GCF_013744875.1_ASM1374487v1	Complete Genome	Nocardia huaxiensis	97.53	8339910	0	240	YES	NO	YES	YES
GCF_001641335.1_ASM164133v1	Contig	Bradyrhizobium stylosanthis	100	8801717	0	239	YES	NO	YES	YES
GCF_021044685.1_ASM2104468v1	Complete Genome	Bradyrhizobium daqingense	99.36	7998085	0	239	YES	NO	YES	YES
GCF_001571085.1_ASM157108v1	Contig	Azohydromonas lata NBRC 102462	99.52	7183251	80	238	YES	YES	YES	YES
GCF_014206845.1_ASM1420684v1	Scaffold	Xanthobacter tagetidis	81.12	4916900	0	237	YES	NO	YES	YES
GCF_002355295.1_ASM235529v1	Complete Genome	Lysobacter capsici	87.3	6270417	159	236	YES	YES	YES	YES
GCF_028981745.1_ASM2898174v1	Scaffold	Wolbachia endosymbiont of Drosophila tristis	98.36	1264866	0	236	YES	NO	YES	YES
GCF_902713635.1_WoCaobscurior_wCobs-BR2009-alpha_v1.0	Scaffold	Wolbachia endosymbiont of Cardiocondyla obscurior	99.09	1194983	0	236	YES	NO	YES	YES
GCF_028981765.1_ASM2898176v1	Scaffold	Wolbachia endosymbiont of Drosophila seguyi	98.36	1174927	0	235	YES	NO	YES	YES
GCF_017815135.1_ASM1781513v1	Contig	Jiella mangrovi	93.56	4929858	0	234	YES	NO	YES	YES
GCF_020103695.1_ASM2010369v1	Scaffold	Hyalangium versicolor	99.57	13559219	0	234	NO	NO	YES	NO
GCF_010894405.1_ASM1089440v1	Scaffold	Pyxidicoccus caerfyrddinensis	98.97	13434823	0	232	NO	NO	YES	NO
GCF_017916175.1_ASM1791617v1	Scaffold	Wolbachia endosymbiont of Drosophila auraria	94	1319217	0	232	YES	NO	YES	YES
GCF_900129305.1_IMG-taxon_2582580750_annotated_assembly	Scaffold	Desulfacinum infernum DSM 9756	89.19	4239823	1	232	YES	NO	YES	YES
GCF_000733295.1_ASM73329v1	Contig	Archangium violaceum Cb vi76	98.08	12537762	0	231	NO	NO	YES	NO
GCF_018454475.1_ASM1845447v1	Contig	Wolbachia endosymbiont of Rhagoletis cerasi	94	1255676	0	231	NO	NO	NO	NO
GCF_947251575.1_ilYpoPlub1.Wolbachia_sp_1.1	Complete Genome	Wolbachia endosymbiont (group A) of Yponomeuta plumbellus	99.09	1418562	0	229	NO	NO	NO	NO
GCF_947251475.1_ilEpiAlte1.Wolbachia_sp_1.1	Complete Genome	Wolbachia endosymbiont (group A) of Epirrhoe alternata	98.73	1197405	0	226	NO	NO	NO	NO
GCF_003382365.1_ASM338236v1	Contig	Lysobacter silvisoli	85.93	4536546	49	225	YES	NO	YES	YES
GCF_008728835.1_ASM872883v1	Complete Genome	Hypericibacter adhaerens	98.9	5865246	3	225	YES	NO	YES	YES
GCF_015291705.1_ASM1529170v1	Complete Genome	Bradyrhizobium arachidis	100	9865973	0	225	YES	NO	YES	YES
GCF_016735695.1_ASM1673569v1	Contig	Microvirga zambiensis WSM3693	85.13	7367324	1	225	YES	NO	YES	YES
GCF_918342435.1_Wolbachia_endosymbiont_of_CSFBv1	Complete Genome	Wolbachia endosymbiont of Psylliodes chrysocephala	88.91	1438854	0	225	YES	NO	YES	YES
GCF_947251795.1_iyAnoNige1.Wolbachia_sp_1.1	Complete Genome	Wolbachia endosymbiont (group A) of Anoplius nigerrimus	99.09	1345805	0	225	YES	NO	YES	YES
GCF_024198175.1_ASM2419817v1	Contig	Pyxidicoccus xibeiensis	98.31	12698915	0	224	NO	NO	YES	NO
GCF_026015925.1_ASM2601592v1	Complete Genome	Wolbachia endosymbiont of Drosophila pseudotakahashii	98	1308415	0	222	NO	NO	NO	NO
GCF_947250015.1_idAcrOrbc1.Wolbachia_sp_1.1	Complete Genome	Wolbachia endosymbiont (group A) of Acrocera orbiculus	97.94	1383045	0	221	YES	NO	YES	YES
GCF_001591025.1_ASM159102v1	Contig	Sphingomonas soli NBRC 100801	98.58	3514102	2	219	YES	YES	YES	YES
GCF_012933655.1_ASM1293365v1	Contig	Pyxidicoccus fallax	92.25	13532887	0	219	NO	NO	YES	NO
GCF_001641635.1_ASM164163v1	Scaffold	Bradyrhizobium centrolobii	99.45	10111113	0	218	YES	NO	YES	YES
GCF_016031635.1_ASM1603163v1	Contig	Bradyrhizobium diversitatis	99.7	8450368	0	218	YES	NO	YES	YES
GCF_026013415.1_ASM2601341v1	Scaffold	Sphingomonas caeni	99.12	4102247	1	218	YES	YES	YES	YES
GCF_918697765.1_Wolbachia_Phyllotreta_cruciferaeV1	Complete Genome	Wolbachia endosymbiont of Phyllotreta cruciferae	98.36	1795892	0	218	NO	NO	NO	NO
GCF_000803645.1_ASM80364v1	Complete Genome	Sphingopyxis fribergensis	95.34	5202172	56	216	YES	YES	YES	YES
GCF_004359355.1_ASM435935v1	Complete Genome	Bradyrhizobium diazoefficiens	99.99	8910608	0	216	YES	NO	YES	YES
GCF_028982185.1_ASM2898218v1	Scaffold	Wolbachia endosymbiont of Drosophila baimaii	96.91	1135565	0	216	YES	NO	YES	YES
GCF_012277315.1_ASM1227731v1	Complete Genome	Wolbachia endosymbiont of Ctenocephalides felis wCfeJ	98	1201647	0	215	YES	NO	YES	YES
GCF_947251645.1_idBibMarc1.Wolbachia_sp_1.1	Complete Genome	Wolbachia endosymbiont (group A) of Bibio marci	98.12	1355351	0	215	YES	NO	YES	YES
GCF_001558695.1_ASM155869v1	Contig	Paramesorhizobium deserti	97.97	5482214	0	213	NO	NO	NO	NO
GCF_018454455.1_ASM1845445v1	Contig	Wolbachia endosymbiont of Ceratitis capitata	94	1239646	0	213	YES	NO	YES	YES
GCF_010894435.1_ASM1089443v1	Scaffold	Pyxidicoccus trucidator	98.66	12670262	0	212	NO	NO	YES	NO
GCF_028982115.1_ASM2898211v1	Scaffold	Wolbachia endosymbiont of Drosophila tsacasi	98.73	1132109	0	212	YES	NO	YES	YES
GCF_003490325.1_ASM349032v1	Contig	Neisseria bergeri		2113031	225	210	YES	YES	YES	YES
GCF_021609905.1_ASM2160990v1	Complete Genome	Wolbachia endosymbiont of Delia radicum	99.09	1586584	0	209	NO	NO	NO	NO
GCF_900128975.1_IMG-taxon_2582580747_annotated_assembly	Scaffold	Devosia limi DSM 17137	98.42	4297655	5	208	YES	NO	YES	YES
GCF_947179475.1_ilCydSple1.Wolbachia_sp_1.1	Contig	Wolbachia endosymbiont (group A) of Cydia splendana	98.12	1446399	0	208	YES	NO	YES	YES
GCF_014904815.1_ASM1490481v1	Contig	Microbulbifer taiwanensis	100	4820307	6	207	YES	YES	YES	YES
GCF_017869155.1_ASM1786915v1	Chromosome	Wolbachia endosymbiont of Ceratosolen solmsi	97.82	1206967	0	207	NO	NO	NO	NO
GCF_030160715.1_ASM3016071v1	Contig	Bradyrhizobium iriomotense	99.61	9789577	0	207	YES	NO	YES	YES
GCF_947251695.1_iyEctCont1.Wolbachia_sp_1.1	Complete Genome	Wolbachia endosymbiont (group A) of Ectemnius continuus	99.09	1299221	0	207	NO	NO	NO	NO
GCF_001742225.1_ASM174222v1	Complete Genome	Novosphingobium resinovorum	97.03	6918128	1	205	YES	YES	YES	YES
GCF_019930585.1_ASM1993058v1	Complete Genome	Sphingomonas nostoxanthinifaciens	96.37	4298284	7	205	YES	NO	YES	YES
GCF_021729075.1_ASM2172907v1	Scaffold	Microbulbifer guangxiensis	96.91	3655934	0	205	YES	YES	YES	YES
GCF_009857535.1_ASM985753v1	Contig	Duganella margarita	98.17	6431183	90	203	YES	NO	YES	YES
GCF_014863405.1_ASM1486340v1	Contig	Dyella acidiphila	99.46	5067993	33	203	YES	YES	YES	YES
GCF_016905005.1_ASM1690500v1	Contig	Dyella kyungheensis	100	4844718	2	203	YES	YES	YES	YES
GCF_014643455.1_ASM1464345v1	Contig	Polymorphobacter glacialis	98.07	3317434	0	202	YES	NO	YES	YES
GCF_001027285.1_ASM102728v1	Complete Genome	Archangium gephyra	97.56	12489432	0	201	NO	NO	YES	NO
GCF_009759665.1_ASM975966v1	Contig	Bradyrhizobium cajani	97.33	8381257	0	200	YES	NO	YES	YES
GCF_014199415.1_ASM1419941v1	Scaffold	Sphingomonas endophytica	96.54	3605788	66	200	YES	YES	YES	YES
GCF_947251775.1_ilEpaGrot1.Wolbachia_sp_2.1	Complete Genome	Wolbachia endosymbiont (group A) of Epagoge grotiana	98.12	1781589	0	200	YES	NO	YES	YES
GCF_962747855.1_M-216	Contig	Neisseria blantyrii	99.83	2105353	199	199	YES	YES	YES	YES
GCF_001650025.1_De_novo	Contig	Devosia elaeis	97.91	3878148	0	198	YES	NO	YES	YES
GCF_001931755.2_ASM193175v2	Complete Genome	Wolbachia endosymbiont of Folsomia candida	97.27	1801626	0	198	YES	NO	YES	YES
GCF_016411825.1_ASM1641182v1	Contig	Devosia sediminis	98.86	4087120	0	198	YES	NO	YES	YES
GCF_006636215.1_ASM663621v1	Contig	Myxococcus llanfairpwllgwyngyllgogerychwyrndrobwllllantysiliogogogochensis	98.63	12411432	0	197	NO	NO	YES	NO
GCF_014203155.1_ASM1420315v1	Scaffold	Shinella fusca	96.49	4851211	0	197	YES	NO	YES	YES
GCF_000756815.1_PRJEB6598_assembly_1	Contig	Legionella massiliensis	99.24	4387007	0	194	YES	NO	YES	YES
GCF_009760915.1_ASM976091v1	Scaffold	Azohydromonas aeria	99.14	7816927	33	194	YES	YES	YES	YES
GCF_024198215.1_ASM2419821v1	Contig	Myxococcus qinghaiensis	98.88	11517428	0	194	NO	NO	YES	NO
GCF_947251755.1_icPhiCogn1.Wolbachia_sp_1.1	Complete Genome	Wolbachia endosymbiont (group A) of Philonthus cognatus	98.36	1811323	0	194	NO	NO	NO	NO
GCF_900094605.1_IMG-taxon_2617270735_annotated_assembly	Scaffold	Bradyrhizobium shewense	99.57	9163226	0	193	YES	NO	YES	YES
GCF_000261645.1_05525	Contig	Bradyrhizobium liaoningense CCBAU 05525	98.02	8164124	0	192	YES	NO	YES	YES
GCF_010977555.1_ASM1097755v1	Complete Genome	Caulobacter rhizosphaerae	97.32	5963910	0	192	YES	NO	YES	YES
GCF_013752735.1_ASM1375273v1	Complete Genome	Bradyrhizobium japonicum	99.47	9226248	0	192	YES	NO	YES	YES
GCF_014196745.1_ASM1419674v1	Scaffold	Sphingomonas kyeonggiensis	93.16	5517776	2	192	YES	NO	YES	YES
GCF_019797865.1_ASM1979786v1	Complete Genome	Chenggangzhangella methanolivorans	71.59	5542510	0	192	YES	YES	YES	YES
GCF_016031625.1_ASM1603162v1	Contig	Bradyrhizobium agreste	99.71	7877331	0	190	YES	NO	YES	YES
GCF_900112865.1_IMG-taxon_2593339196_annotated_assembly	Scaffold	Dyella marensis	100	5005584	0	190	YES	YES	YES	YES
GCF_002776695.1_ASM277669v1	Scaffold	Bradyrhizobium nitroreducens	100	8199267	0	189	YES	NO	YES	YES
GCF_000737315.1_ASM73731v1	Contig	Hyalangium minutum	99.04	11186183	0	188	NO	NO	YES	NO
GCF_025717065.2_ASM2571706v2	Contig	Tahibacter soli	98.94	6653649	0	188	NO	NO	NO	NO
GCF_029167075.1_ASM2916707v1	Contig	Bradyrhizobium yuanmingense	99.75	8226123	0	188	YES	NO	YES	YES
GCF_003284725.1_ASM328472v1	Contig	Paramagnetospirillum kuznetsovii	99.56	4405793	50	187	YES	YES	YES	YES
GCF_019655855.2_ASM1965585v2	Contig	Pseudomonas paralcaligenes	98.08	5408033	88	187	YES	YES	YES	YES
GCF_024198255.1_ASM2419825v1	Contig	Myxococcus guangdongensis	98.88	11198912	0	187	NO	NO	YES	NO
GCF_900292045.1_PRJEB24955	Contig	Parabacteroides pacaensis	88	5238628	0	187	YES	NO	NO	NO
GCF_947251915.1_iyHylComm1.Wolbachia_sp_1.1	Complete Genome	Wolbachia endosymbiont (group A) of Hylaeus communis	98.36	1526905	0	187	NO	NO	NO	NO
GCF_001314325.1_ASM131432v1	Complete Genome	Sphingopyxis macrogoltabida	93.74	5748623	6	186	YES	YES	YES	YES
GCF_005144425.2_ASM514442v2	Complete Genome	Agrobacterium larrymoorei	97.25	5083402	0	184	YES	YES	YES	YES
GCF_010669145.1_ASM1066914v1	Complete Genome	Rhizobium oryzihabitans	91.07	5858741	0	184	YES	YES	YES	YES
GCF_900156335.1_IMG-taxon_2681812894_annotated_assembly	Scaffold	Sphaerotilus natans	99.88	4630083	1	184	YES	YES	YES	YES
GCF_002741015.1_ASM274101v1	Complete Genome	Microvirga ossetica	83.41	9631051	1	182	YES	NO	YES	YES
GCF_003351565.1_ASM335156v1	Complete Genome	Neisseria lactamica	99.63	2200224	192	182	YES	YES	YES	YES
GCF_008123515.1_ASM812351v1	Contig	Bradyrhizobium cytisi	99.9	8854489	0	182	YES	NO	YES	YES
GCF_010894455.1_ASM1089445v1	Scaffold	Myxococcus eversor	98.81	11394166	0	182	NO	NO	YES	NO
GCF_000428145.1_ASM42814v1	Scaffold	Chitinilyticum litopenaei DSM 21440	99.17	3968450	49	181	YES	YES	YES	YES
GCF_020103725.1_ASM2010372v1	Contig	Hyalangium gracile	98.94	11731597	0	181	NO	NO	YES	NO
GCF_024198235.1_ASM2419823v1	Contig	Myxococcus dinghuensis	99.08	10408129	0	181	NO	NO	YES	NO
GCF_004792685.1_ASM479268v1	Contig	Sphingomonas gei	98.84	4661578	0	180	YES	NO	YES	YES
GCF_003351225.1_ASM335122v1	Scaffold	Dyella solisilvae	100	4601888	6	179	YES	YES	YES	YES
GCF_004114955.1_ASM411495v1	Complete Genome	Bradyrhizobium guangzhouense	99.17	8138177	0	179	YES	NO	YES	YES
GCF_002355275.1_ASM235527v1	Complete Genome	Rhizorhabdus dicambivorans	99.65	5541299	24	178	YES	YES	YES	YES
GCF_003390885.1_ASM339088v1	Contig	Pelagibacterium sediminicola	98.72	3240150	0	178	YES	NO	YES	YES
GCF_003611695.1_ASM361169v1	Contig	Corallococcus carmarthensis	98.5	10793792	0	178	NO	NO	YES	NO
GCF_013178945.1_ASM1317894v1	Contig	Bradyrhizobium aeschynomenes	99.54	7522254	0	178	YES	NO	YES	YES
GCF_017639205.1_ASM1763920v1	Complete Genome	Streptomyces nojiriensis	99.95	9022916	0	178	NO	NO	NO	NO
GCF_900696085.1_ERZ807199	Contig	Bradyrhizobium ivorense	99.81	9412302	0	178	YES	NO	YES	YES
GCF_962719845.1_12_17465_XS2_1	Contig	Neisseria uirgultaei	99.83	2002643	188	178	NO	NO	NO	NO
GCF_000423185.1_ASM42318v1	Scaffold	Inquilinus limosus DSM 16000	99.31	7413714	2	176	YES	NO	YES	YES
GCF_009380215.1_ASM938021v1	Scaffold	Rugamonas aquatica	100	7225996	85	176	YES	YES	YES	YES
GCF_016595245.1_ASM1659524v1	Scaffold	Azospirillum endophyticum	95.99	8174113	51	176	NO	NO	NO	NO
GCF_017302975.1_ASM1730297v1	Contig	Corallococcus exiguus	98.97	10538407	0	176	NO	NO	YES	NO
GCF_000331735.1_ASM33173v1	Complete Genome	Myxococcus stipitatus DSM 14675	98.74	10350586	0	175	NO	NO	YES	NO
GCF_009176665.1_ASM917666v1	Complete Genome	Bradyrhizobium ottawaense	99.37	8442078	0	175	YES	NO	YES	YES
GCF_011926545.1_ASM1192654v1	Scaffold	Sphingopyxis italica	94.19	4042700	31	175	NO	NO	NO	NO
GCF_016865235.1_ASM1686523v1	Complete Genome	Dyella caseinilytica	99.53	4812204	28	175	YES	YES	YES	YES
GCF_026421305.1_ASM2642130v1	Contig	Dyella silvae	100	4451836	7	175	YES	YES	YES	YES
GCF_936270145.1_WolOegibB_v1.0	Complete Genome	Wolbachia endosymbiont of Oedothorax gibbosus	97.76	1551378	0	175	YES	NO	YES	YES
GCF_002197845.1_ASM219784v1	Contig	Fimbriiglobus ruber	96.21	12363577	0	174	NO	NO	NO	NO
GCF_004114535.1_ASM411453v1	Scaffold	Bradyrhizobium nanningense	99.89	8290088	0	174	NO	NO	YES	NO
GCF_012274265.1_ASM1227426v1	Contig	Sphingopyxis microcysteis	93.03	3463217	0	174	YES	YES	YES	YES
GCF_007754155.1_ASM775415v1	Chromosome	Stieleria neptunia	99.02	10975817	0	173	NO	NO	NO	NO
GCF_002374855.1_ASM237485v1	Contig	Sphingomonas adhaesiva	99.67	3760237	0	172	YES	NO	YES	YES
GCF_019402665.1_ASM1940266v1	Scaffold	Bradyrhizobium canariense	99.1	8561472	0	172	YES	NO	YES	YES
GCF_900101905.1_IMG-taxon_2619619029_annotated_assembly	Scaffold	Myxococcus virescens	98.33	9240716	0	172	NO	NO	YES	NO
GCF_016741935.1_ASM1674193v1	Contig	Streptomyces endocoffeicus	99.34	13128250	0	171	NO	NO	NO	NO
GCF_000428785.1_ASM42878v1	Scaffold	Conchiformibius kuhniae DSM 17694	99.08	2118625	101	170	NO	NO	NO	NO
GCF_016862215.1_ASM1686221v1	Contig	Actinoplanes humidus	91.7	11100543	0	170	NO	NO	NO	NO
GCF_026340005.1_ASM2634000v1	Contig	Streptomyces mirabilis	99.91	12677169	0	170	NO	NO	NO	NO
GCF_900289045.1_MPGL2	Complete Genome	Micropruina glycogenica	94.04	3844677	0	170	YES	NO	YES	YES
GCF_001693515.2_ASM169351v2	Complete Genome	Bradyrhizobium paxllaeri	99.85	8377719	0	169	YES	NO	YES	YES
GCF_002288825.1_ASM228882v1	Contig	Sphingomonas lenta	98.63	3757425	0	169	YES	NO	YES	YES
GCF_003612125.1_ASM361212v1	Contig	Corallococcus praedator	97.97	10510652	0	169	NO	NO	YES	NO
GCF_021391395.1_ASM2139139v1	Complete Genome	Sphingomonas cannabina	98.43	4386171	26	169	YES	NO	YES	YES
GCF_001440385.1_ASM144038v1	Contig	Bradyrhizobium valentinum	99.26	9146476	0	168	YES	NO	YES	YES
GCF_004114935.1_ASM411493v1	Complete Genome	Bradyrhizobium zhanjiangense	99.89	9342022	0	168	YES	NO	YES	YES
GCF_016584105.1_ASM1658410v1	Scaffold	Ectothiorhodospira shaposhnikovii	93.17	3788226	72	168	NO	NO	NO	NO
GCF_900111765.1_IMG-taxon_2693429886_annotated_assembly	Scaffold	Myxococcus fulvus	98.76	10824667	0	168	NO	NO	YES	NO
GCF_947251485.1_iyScaNigr1.Wolbachia_sp_1.1	Complete Genome	Wolbachia endosymbiont (group A) of Scambus nigricans	97.39	1150902	0	168	NO	NO	NO	NO
GCF_962707005.1_G97_1402	Contig	Neisseria basseii	99.63	2174316	176	168	YES	YES	YES	YES
GCF_000284275.1_ASM28427v1	Complete Genome	Bradyrhizobium cosmicum	99.96	7231841	0	167	YES	NO	YES	NO
GCF_014199295.1_ASM1419929v1	Contig	Sphingopyxis panaciterrulae	93.15	4432917	40	167	YES	YES	YES	YES
GCF_016641735.1_ASM1664173v1	Contig	Ramlibacter algicola	99.66	4204141	50	167	YES	YES	YES	YES
GCF_018286635.1_ASM1828663v1	Complete Genome	Sphingobium phenoxybenzoativorans	92.7	4828758	4	167	YES	YES	YES	YES
GCF_000828125.2_ASM82812v2	Contig	Rickettsia asembonensis	99.33	1376743	24	166	YES	NO	YES	YES
GCF_011927635.1_ASM1192763v1	Scaffold	Sphingomonas trueperi	94.75	4619810	9	166	YES	NO	YES	YES
GCF_014204795.1_ASM1420479v1	Contig	Nonomuraea jabiensis	92.17	13173116	0	166	NO	NO	NO	NO
GCF_014635325.1_ASM1463532v1	Scaffold	Azorhizobium oxalatiphilum	89.14	6396426	0	166	YES	NO	YES	YES
GCF_014643375.1_ASM1464337v1	Contig	Aureimonas glaciei	97.54	5642654	0	166	YES	NO	YES	YES
GCF_947251515.1_idSicFerr1.Wolbachia_sp_1.1	Complete Genome	Wolbachia endosymbiont (group A) of Sicus ferrugineus	98.73	1273940	0	166	YES	NO	YES	YES
GCF_005893125.1_ASM589312v1	Contig	Nonomuraea basaltis	91.86	14334648	0	165	NO	NO	NO	NO
GCF_020329435.1_ASM2032943v1	Contig	Bradyrhizobium hereditatis	99.7	7871253	0	165	YES	NO	YES	YES
GCF_004336905.1_ASM433690v1	Contig	Dyella soli	100	8185998	8	164	YES	YES	YES	YES
GCF_014204535.1_ASM1420453v1	Contig	Novosphingobium chloroacetimidivorans	95.92	4613864	47	164	YES	YES	YES	YES
GCF_025656855.1_ASM2565685v1	Scaffold	Shinella yambaruensis	99.93	6878131	0	164	YES	NO	YES	YES
GCF_026130605.1_ASM2613060v1	Contig	Sphingomonas lycopersici	95.31	5034064	83	164	YES	YES	YES	YES
GCF_001887355.1_ASM188735v1	Contig	Cystobacter ferrugineus	98.9	12051756	0	163	NO	NO	YES	NO
GCF_002335465.1_Solivochromogenes3561_assembly01	Contig	Streptomyces olivochromogenes	100	11639641	0	163	NO	NO	NO	NO
GCF_003611735.1_ASM361173v1	Contig	Corallococcus sicarius	97.85	10393104	0	163	NO	NO	YES	NO
GCF_005889725.1_ASM588972v1	Contig	Nonomuraea zeae	93.62	13613686	0	163	NO	NO	NO	NO
GCF_014196925.1_ASM1419692v1	Scaffold	Chelatococcus caeni	94.7	5435358	0	163	YES	NO	YES	YES
GCF_014873145.1_ASM1487314v1	Contig	Nonomuraea angiospora	92.61	13093168	0	163	NO	NO	NO	NO
GCF_024172165.1_ASM2417216v1	Contig	Nonomuraea thailandensis	92.53	13765184	0	163	NO	NO	NO	NO
GCF_028981785.1_ASM2898178v1	Scaffold	Wolbachia endosymbiont of Drosophila leontia	98.36	1096851	0	163	YES	NO	YES	YES
GCF_902813185.1_Denitratisoma_oestradiolicum_DSM16959	Complete Genome	Denitratisoma oestradiolicum	89.58	4293412	2	163	YES	YES	YES	YES
GCF_958267405.1_02_01105_XS1_1	Contig	Neisseria maigaei	99.63	2136407	181	163	YES	NO	YES	YES
GCF_013607875.1_ASM1360787v1	Scaffold	Sphingomonas ursincola	98.86	3807031	52	162	YES	YES	YES	YES
GCF_026344005.1_ASM2634400v1	Contig	Kaistia terrae	90.13	5594089	0	162	YES	YES	YES	YES
GCF_900188345.1_IMG-taxon_2671180041_annotated_assembly	Scaffold	Streptosporangium subroseum	88.67	10782574	0	162	NO	NO	NO	NO
GCF_900324035.1_BRAD3257	Complete Genome	Bradyrhizobium vignae	99.76	8156021	0	162	YES	NO	YES	YES
GCF_000429965.1_ASM42996v1	Scaffold	Desulfogranum mediterraneum DSM 13871	99.66	4796810	75	161	YES	NO	YES	YES
GCF_001981525.1_ASM198152v1	Contig	Sphingomonas jeddahensis	98.48	3117315	16	161	YES	YES	YES	YES
GCF_018138715.1_ASM1813871v1	Contig	Streptomyces asiaticus	99.34	11877923	0	161	NO	NO	NO	NO
GCF_028982005.1_ASM2898200v1	Scaffold	Wolbachia endosymbiont of Drosophila bocki	97.88	1090928	0	161	YES	NO	YES	YES
GCF_028982105.1_ASM2898210v1	Scaffold	Wolbachia endosymbiont of Drosophila bicornuta	98.12	1192611	0	161	YES	NO	YES	YES
GCF_001598435.1_ASM159843v1	Contig	Sphingomonas pituitosa NBRC 102491	99.36	4743156	8	160	YES	YES	YES	YES
GCF_003344345.1_ASM334434v1	Contig	Wolbachia endosymbiont of Cylisticus convexus	88.37	2109518	0	160	YES	NO	YES	YES
GCF_014653575.1_ASM1465357v1	Scaffold	Sphingomonas glacialis	98.93	4470563	3	160	YES	NO	YES	YES
GCF_018138705.1_ASM1813870v1	Contig	Streptomyces indonesiensis	99.34	11666822	0	160	NO	NO	NO	NO
GCF_000426225.1_ASM42622v1	Scaffold	Desulforegula conservatrix Mb1Pa	99.21	4469042	0	159	NO	NO	NO	NO
GCF_010811875.1_ASM1081187v1	Contig	Bradyrhizobium uaiense	96.1	9972761	0	159	YES	NO	YES	YES
GCF_014638275.1_ASM1463827v1	Scaffold	Primorskyibacter flagellatus	99.69	4612182	0	159	YES	NO	YES	YES
GCF_014640615.1_ASM1464061v1	Scaffold	Brucella endophytica	83.56	4932019	0	159	YES	NO	YES	YES
GCF_019059395.1_ASM1905939v1	Contig	Streptomyces cangkringensis	98.96	11723082	0	159	NO	NO	NO	NO
GCF_021390325.1_ASM2139032v1	Contig	Jiella avicenniae	96.35	5178257	0	159	YES	NO	YES	YES
GCF_000430725.1_ASM43072v1	Scaffold	Azohydromonas australica DSM 1124	99.52	8786776	52	158	NO	NO	NO	NO
GCF_017876165.1_ASM1787616v1	Contig	Azospirillum soli	91.89	6803056	50	158	YES	YES	YES	YES
GCF_004358345.1_ASM435834v1	Complete Genome	Parashewanella spongiae	86.4	5468749	2	157	YES	YES	YES	YES
GCF_016862475.1_ASM1686247v1	Contig	Actinoplanes xinjiangensis	93.32	10771015	0	157	NO	NO	NO	NO
GCF_019396345.1_ASM1939634v1	Scaffold	Nonomuraea guangzhouensis	91.57	13673866	0	157	NO	NO	NO	NO
GCF_900323885.1_ASM90032388v1	Contig	Actinomadura parvosata subsp. kistnae	89.68	13559781	0	157	NO	NO	NO	NO
GCF_001514305.1_ASM151430v1	Scaffold	Streptomyces dysideae	100	10773767	0	156	NO	NO	NO	NO
GCF_003004785.1_ASM300478v1	Contig	Alsobacter soli	99.5	5190571	0	156	YES	NO	YES	YES
GCF_003201955.1_ASM320195v1	Scaffold	Blastomonas natatoria	99.52	4045865	47	156	YES	YES	YES	YES
GCF_900188055.1_IMG-taxon_2724679789_annotated_assembly	Scaffold	Tistlia consotensis	100	6929445	10	156	YES	YES	YES	YES
GCF_007859655.1_ASM785965v1	Complete Genome	Devosia ginsengisoli	92.72	4480314	8	155	YES	NO	YES	YES
GCF_015356825.1_ASM1535682v1	Contig	Catenulispora rubra	100	12797989	0	155	NO	NO	NO	NO
GCF_016031655.1_ASM1603165v1	Contig	Bradyrhizobium glycinis	99.69	7794411	0	155	YES	NO	YES	YES
GCF_020103775.1_ASM2010377v1	Contig	Stigmatella hybrida	98.42	9159828	0	155	NO	NO	YES	NO
GCF_962747945.1_M-101	Contig	Neisseria viridiae	99.63	2018023	153	155	YES	YES	YES	YES
GCF_000255295.1_ASM25529v1	Complete Genome	Corallococcus coralloides DSM 2259	99.11	10080619	0	154	NO	NO	YES	NO
GCF_000934755.1_ASM93475v1	Scaffold	Desulfonatronovibrio magnus	98.81	4809662	0	154	YES	NO	YES	YES
GCF_000226315.1_ASM22631v1	Complete Genome	Micavibrio aeruginosavorus ARL-13	99.57	2481983	18	153	YES	NO	YES	YES
GCF_000344805.1_ASM34480v1	Complete Genome	Bradyrhizobium oligotrophicum S58	98.76	8264165	0	153	YES	NO	YES	YES
GCF_003675955.1_ASM367595v1	Contig	Streptomyces rapamycinicus NRRL 5491	99.91	12663199	0	153	NO	NO	NO	NO
GCF_005116715.1_ASM511671v1	Contig	Ferrimonas sediminicola	97.12	3966543	9	153	YES	NO	YES	YES
GCF_007830635.1_ASM783063v1	Scaffold	Bradyrhizobium huanghuaihaiense	99.6	9226856	0	153	YES	NO	YES	YES
GCF_000264945.2_ASM26494v2	Complete Genome	Sphingobium indicum B90A	97.13	3945731	7	152	YES	YES	YES	YES
GCF_000429645.1_ASM42964v1	Scaffold	Niveispirillum irakense DSM 11586	100	5455784	23	152	YES	YES	YES	YES
GCF_001641755.2_ASM164175v2	Contig	Microbulbifer flavimaris	100	3643020	0	152	YES	YES	YES	YES
GCF_008123965.1_ASM812396v1	Scaffold	Bradyrhizobium hipponense	98.91	8826946	0	152	YES	NO	YES	YES
GCF_000024865.1_ASM2486v1	Complete Genome	Streptosporangium roseum DSM 43021	97.91	10369518	0	151	NO	NO	NO	NO
GCF_003611635.1_ASM361163v1	Contig	Corallococcus terminator	98.95	10351705	0	151	NO	NO	YES	NO
GCF_016598615.1_ASM1659861v1	Complete Genome	Streptomyces liliifuscus	99.46	11347200	0	151	NO	NO	NO	NO
GCF_016862235.1_ASM1686223v1	Contig	Actinoplanes italicus	94.11	11098820	0	151	NO	NO	NO	NO
GCF_017876155.1_ASM1787615v1	Contig	Azospirillum rugosum	93.14	7798764	33	151	NO	NO	NO	NO
GCF_000335475.2_ASM33547v2	Contig	Cystobacter fuscus DSM 2262	97.56	12282374	0	150	NO	NO	YES	NO
GCF_000718165.1_ASM71816v1	Contig	Streptomyces fulvoviolaceus	99.91	11584616	0	150	NO	NO	NO	NO
GCF_002266435.2_ASM226643v2	Complete Genome	Bradyrhizobium amphicarpaeae		7044517	0	150	YES	NO	YES	YES
GCF_003056345.1_ASM305634v1	Contig	Devosia submarina	97.84	3980379	0	150	YES	NO	YES	YES
GCF_003217325.1_ASM321732v1	Scaffold	Rhodopseudomonas faecalis	90.67	4068611	0	150	YES	YES	YES	YES
GCF_000235425.2_ASM23542v3	Scaffold	Pseudofrankia saprophytica	99.37	9978592	0	149	NO	NO	NO	NO
GCF_000280925.3_ASM28092v3	Complete Genome	Myxococcus hansupus	96.11	9490432	0	149	NO	NO	YES	NO
GCF_014297575.1_ASM1429757v1	Complete Genome	Dyella telluris	100	4991029	36	149	YES	YES	YES	YES
GCF_017874715.1_ASM1787471v1	Contig	Streptomyces iranensis	99.91	11981584	0	149	NO	NO	NO	NO
GCF_020889705.1_ASM2088970v1	Contig	Bradyrhizobium altum	96.29	9758985	0	149	YES	NO	YES	YES
GCF_900188185.1_IMG-taxon_2706795027_annotated_assembly	Contig	Sphingopyxis indica	93.63	4149802	26	148	YES	YES	YES	YES
GCF_001641695.1_ASM164169v1	Scaffold	Bradyrhizobium neotropicale	98.72	8679329	0	147	YES	NO	YES	YES
GCF_002217755.1_ASM221775v1	Scaffold	Streptomyces hyaluromycini	100	11525033	0	147	NO	NO	NO	NO
GCF_003011895.2_ASM301189v2	Contig	Massilia glaciei	80.48	6288546	1	147	YES	YES	YES	YES
GCF_003590775.1_ASM359077v1	Contig	Sphingomonas cavernae	98.8	4244097	47	147	YES	NO	YES	YES
GCF_009377185.1_ASM937718v1	Contig	Streptomyces spongiae	98.48	11307761	0	147	NO	NO	NO	NO
GCF_010994755.1_ASM1099475v2	Scaffold	Shinella lacus	96.15	7043451	0	147	YES	NO	YES	YES
GCF_016834655.1_ASM1683465v1	Contig	Actinoplanes ovalisporus	94.51	11420128	0	147	NO	NO	NO	NO
GCF_016892765.1_ASM1689276v1	Contig	Microvirga arvi	77.43	6462601	0	147	YES	NO	YES	YES
GCF_025908395.1_ASM2590839v1	Complete Genome	Streptomyces milbemycinicus	98.9	12063392	0	147	NO	NO	NO	NO
GCF_002980495.1_ASM298049v1	Contig	Phyllobacterium phragmitis	99.51	5625008	0	146	YES	NO	YES	YES
GCF_003611585.1_ASM361158v1	Contig	Corallococcus exercitus	98.53	10148184	0	146	NO	NO	YES	NO
GCF_003851005.1_ASM385100v1	Contig	Desulfonema ishimotonii	97.56	6638737	36	146	NO	NO	NO	NO
GCF_003977615.1_ASM397761v1	Scaffold	Dyella dinghuensis	99.4	4218720	5	146	YES	YES	YES	YES
GCF_006334915.2_ASM633491v2	Contig	Microbispora catharanthi	85.61	9251614	0	146	NO	NO	NO	NO
GCF_007828095.1_ASM782809v1	Scaffold	Bradyrhizobium sacchari	99.99	8530034	0	146	YES	NO	YES	YES
GCF_012871055.1_ASM1287105v1	Complete Genome	Bradyrhizobium elkanii USDA 61	97.55	9649995	0	146	YES	NO	YES	YES
GCF_014203715.1_ASM1420371v1	Scaffold	Streptosporangium saharense	84.96	8496112	0	146	NO	NO	NO	NO
GCF_014873755.1_ASM1487375v1	Contig	Amycolatopsis lexingtonensis	99.06	10737921	0	146	NO	NO	NO	NO
GCF_019396325.1_ASM1939632v1	Scaffold	Nonomuraea ceibae	89.17	10309590	0	146	NO	NO	NO	NO
GCF_900109545.1_IMG-taxon_2693429895_annotated_assembly	Contig	Stigmatella aurantiaca	98.71	9365767	0	146	NO	NO	YES	NO
GCF_900111745.1_IMG-taxon_2693429888_annotated_assembly	Contig	Stigmatella erecta	98.13	9217225	0	146	NO	NO	YES	NO
GCF_009760925.1_ASM976092v1	Scaffold	Nonomuraea typhae	88.12	11388961	0	145	NO	NO	NO	NO
GCF_009909145.1_ASM990914v1	Contig	Corallococcus silvisoli	98.7	9232290	0	145	NO	NO	YES	NO
GCF_013328205.1_ASM1332820v1	Scaffold	Sphingomonas hominis	93.46	3558103	0	145	YES	YES	YES	YES
GCF_016103505.1_ASM1610350v1	Contig	Streptomyces javensis	94.29	10647866	0	145	NO	NO	NO	NO
GCF_021611515.1_ASM2161151v1	Complete Genome	Mariluticola halotolerans	97.8	3446865	26	145	YES	NO	YES	YES
GCF_022012555.1_ASM2201255v1	Scaffold	Bradyrhizobium zhengyangense	99.7	9038162	0	145	YES	NO	YES	YES
GCF_024172185.1_ASM2417218v1	Contig	Nonomuraea roseoviolacea subsp. carminata	89.07	9752649	0	145	NO	NO	NO	NO
GCF_000012685.1_ASM1268v1	Complete Genome	Myxococcus xanthus DK 1622	98.74	9139763	0	144	NO	NO	YES	NO
GCF_003668875.1_ASM366887v1	Contig	Corallococcus interemptor	98.83	9471940	0	144	NO	NO	YES	NO
GCF_015689475.1_ASM1568947v1	Complete Genome	Streptomyces solisilvae	97.51	11639536	0	144	NO	NO	NO	NO
GCF_018332715.1_ASM1833271v1	Contig	Actinoplanes consettensis	91.54	10606845	0	144	NO	NO	NO	NO
GCF_000331005.1_Sturgcar8v1.0	Contig	Streptomyces turgidiscabies Car8	99.19	10825282	0	143	NO	NO	NO	NO
GCF_001758785.1_ASM175878v1	Contig	Duganella phyllosphaerae	99.06	6183250	38	143	YES	NO	YES	YES
GCF_002305895.1_ASM230589v1	Complete Genome	Corallococcus macrosporus DSM 14697	98.13	8973512	0	143	NO	NO	YES	NO
GCF_003001935.1_ASM300193v1	Contig	Nonomuraea fuscirosea	93.41	12180574	0	143	NO	NO	NO	NO
GCF_003612165.1_ASM361216v1	Contig	Corallococcus aberystwythensis	98.68	9981836	0	143	NO	NO	YES	NO
GCF_004349015.1_ASM434901v1	Contig	Nonomuraea diastatica	88.73	10861993	0	143	NO	NO	NO	NO
GCF_008087625.1_ASM808762v1	Complete Genome	Aquisphaera giovannonii	97.33	10526296	0	143	NO	NO	NO	NO
GCF_008728855.1_ASM872885v1	Complete Genome	Hypericibacter terrae	99.56	5894118	0	143	YES	NO	YES	YES
GCF_017493175.3_ASM1749317v3	Complete Genome	Bradyrhizobium quebecense	100	8753169	0	143	YES	NO	YES	YES
GCF_026343615.1_ASM2634361v1	Contig	Streptomyces phaeochromogenes	99.84	11086338	0	143	NO	NO	NO	NO
GCF_000971295.1_ASM97129v1	Contig	Devosia epidermidihirudinis	97.77	3859784	2	142	YES	NO	YES	YES
GCF_001625085.1_ASM162508v1	Contig	Nocardia acidivorans NBRC 108247	96.82	7571893	0	142	NO	NO	NO	NO
GCF_001696485.1_ASM169648v1	Scaffold	Planobispora rosea	84.09	8690708	0	142	NO	NO	NO	NO
GCF_002568625.1_ASM256862v1	Complete Genome	Nocardia terpenica	96.2	8918539	0	142	YES	NO	YES	YES
GCF_008905045.1_ASM890504v1	Scaffold	Streptomyces albicerus	99.91	11977091	0	142	NO	NO	NO	NO
GCF_010500815.1_ASM1050081v1	Scaffold	Jiella pacifica	97.39	5774732	0	142	YES	NO	YES	YES
GCF_023571765.1_ASM2357176v1	Contig	Xanthobacter aminoxidans	93.77	5829267	0	142	NO	NO	NO	NO
GCF_900167915.1_IMG-taxon_2706795026_annotated_assembly	Contig	Rhizorhabdus histidinilytica	100	5473339	27	142	YES	YES	YES	YES
GCF_000711955.1_ASM71195v1	Scaffold	Nevskia soli DSM 19509	93.55	5780610	18	141	YES	YES	YES	YES
GCF_006516955.1_ASM651695v1	Contig	Martelella alba	94.33	4990712	0	141	YES	NO	YES	YES
GCF_014203235.1_ASM1420323v1	Scaffold	Nonomuraea endophytica	89.41	11471676	0	141	NO	NO	NO	NO
GCF_003217235.1_ASM321723v1	Scaffold	Phyllobacterium leguminum	97.56	3737298	0	140	YES	NO	YES	YES
GCF_004005865.1_ASM400586v1	Contig	Sphingomonas crocodyli	99.53	4883533	0	140	YES	NO	YES	YES
GCF_010894475.1_ASM1089447v1	Contig	Myxococcus vastator	98.13	8990913	0	140	NO	NO	YES	NO
GCF_014647515.1_ASM1464751v1	Scaffold	Dactylosporangium sucinum	97.12	12103263	0	140	NO	NO	NO	NO
GCF_018927715.1_ASM1892771v1	Scaffold	Streptomyces brasiliscabiei	99.57	10791795	0	140	NO	NO	NO	NO
GCF_021462265.1_ASM2146226v1	Contig	Streptomyces shenzhenensis	99.81	10659425	0	140	NO	NO	NO	NO
GCF_022012305.1_ASM2201230v1	Contig	Ramlibacter paludis	95.03	4993032	38	140	YES	YES	YES	YES
GCF_000017565.1_ASM1756v1	Complete Genome	Parvibaculum lavamentivorans DS-1	98.77	3914745	0	139	YES	YES	YES	YES
GCF_003721215.1_ASM372121v1	Scaffold	Streptomyces botrytidirepellens	98.09	11008137	0	139	NO	NO	NO	NO
GCF_003977665.1_ASM397766v1	Scaffold	Dyella choica	99.02	5488740	19	139	NO	NO	NO	NO
GCF_010093305.1_ASM1009330v1	Contig	Pseudoxanthomonas sacheonensis	91.87	4036284	21	139	YES	YES	YES	YES
GCF_958267435.1_M-091	Contig	Neisseria benedictiae	99.63	2091101	144	139	NO	NO	NO	NO
GCF_000716805.1_ASM71680v1	Contig	Streptomyces yerevanensis	99.91	10925884	0	138	NO	NO	NO	NO
GCF_000721105.1_ASM72110v1	Contig	Streptomyces cellulosae	100	10063079	0	138	NO	NO	NO	NO
GCF_001017175.1_ASM101717v1	Scaffold	Microvirga vignae	82.25	6472445	1	138	YES	NO	YES	YES
GCF_016772415.1_ASM1677241v2	Contig	Phenylobacterium glaciei	94.62	4242328	0	138	YES	NO	YES	YES
GCF_016862055.1_ASM1686205v1	Contig	Actinoplanes capillaceus	93.48	9722078	0	138	NO	NO	NO	NO
GCF_017942185.1_ASM1794218v1	Contig	Streptomyces rhizosphaericus	99.72	11044339	0	138	NO	NO	NO	NO
GCF_020215705.1_ASM2021570v1	Scaffold	Nonomuraea aurantiaca	89.64	11847238	0	138	NO	NO	NO	NO
GCF_020889685.1_ASM2088968v1	Contig	Bradyrhizobium oropedii	96.51	9043029	0	138	YES	NO	YES	YES
GCF_024508375.2_ASM2450837v2	Contig	Streptomyces justiciae	100	10657029	0	138	NO	NO	NO	NO
GCF_024809475.1_ASM2480947v1	Scaffold	Bradyrhizobium centrosematis	99.92	8006841	0	138	YES	NO	YES	YES
GCF_001717955.1_ASM171795v1	Complete Genome	Sphingomonas panacis	98.67	5322941	0	137	YES	NO	YES	YES
GCF_002154675.1_ASM215467v1	Scaffold	Streptomyces reticuliscabiei	97.92	9962914	0	137	NO	NO	NO	NO
GCF_003173035.1_ASM317303v1	Contig	Zavarzinia aquatilis	99.56	4477202	0	137	YES	NO	YES	NO
GCF_004341885.1_ASM434188v1	Scaffold	Shinella granuli	99.93	6590828	0	137	YES	NO	YES	YES
GCF_004343305.1_ASM434330v1	Contig	Pseudofulvimonas gallinarii	98.3	3452107	21	137	YES	YES	YES	YES
GCF_006716425.1_ASM671642v1	Contig	Actinoallomurus bryophytorum	93.35	9466640	0	137	NO	NO	NO	NO
GCF_011045025.1_ASM1104502v1	Scaffold	Streptomyces ureilyticus	99.81	10480775	0	137	NO	NO	NO	NO
GCF_013912435.1_ASM1391243v1	Contig	Streptomyces himalayensis subsp. aureolus	99.91	9067473	0	137	NO	NO	NO	NO
GCF_017068375.1_ASM1706837v1	Complete Genome	Rhodococcus koreensis	99.46	10909875	0	137	NO	NO	NO	NO
GCF_020889785.1_ASM2088978v1	Contig	Bradyrhizobium acaciae	95.67	8471967	0	137	YES	NO	YES	YES
GCF_900218015.1_IMG-taxon_2740891836_annotated_assembly	Scaffold	Rhodopseudomonas pentothenatexigens	99.73	5383361	0	137	YES	NO	YES	YES
GCF_000601485.1_Chondromyces_apiculatus_DSM_436_genome_assembly	Contig	Chondromyces apiculatus DSM 436	98.28	11577721	0	136	NO	NO	NO	NO
GCF_001982635.1_ASM198263v1	Contig	Bradyrhizobium mercantei	99.67	8842857	0	136	YES	NO	YES	YES
GCF_014637955.1_ASM1463795v1	Scaffold	Halopseudomonas salina	90.85	3812033	26	136	YES	YES	YES	YES
GCF_018274385.1_ASM1827438v1	Contig	Catenulispora pinistramenti	100	11465056	0	136	NO	NO	NO	NO
GCF_000531125.1_COMPJ11_2695_PRJEB4343	Contig	Candidatus Contendobacter odensis Run_B_J11	97.19	4611646	48	135	YES	YES	YES	YES
GCF_000689175.1_wGmm_version4	Scaffold	Wolbachia endosymbiont of Glossina morsitans morsitans	78.47	1019510	0	135	YES	NO	YES	YES
GCF_000716445.1_ASM71644v1	Contig	Streptomyces wedmorensis	99.91	9380839	0	135	NO	NO	NO	NO
GCF_001189035.1_ASM118903v1	Scaffold	Streptomyces stelliscabiei	99.6	10419108	0	135	NO	NO	NO	NO
GCF_002242805.1_ASM224280v1	Scaffold	Streptomyces diastatochromogenes	99.72	10520052	0	135	NO	NO	NO	NO
GCF_003612055.1_ASM361205v1	Contig	Corallococcus llansteffanensis	97.91	10526383	0	135	NO	NO	YES	NO
GCF_004348685.1_ASM434868v1	Contig	Nonomuraea deserti	89.57	10694046	0	135	NO	NO	NO	NO
GCF_009911755.1_ASM991175v1	Complete Genome	Pseudomonas knackmussii	99.36	6095635	12	135	NO	NO	YES	NO
GCF_027920805.1_ASM2792080v1	Contig	Govania unica	97.69	3212657	16	135	YES	NO	YES	YES
GCF_002205635.1_ASM220563v1	Scaffold	Sphingopyxis witflariensis	93.91	4306761	6	134	YES	YES	YES	YES
GCF_003024195.1_ASM302419v1	Scaffold	Streptomyces dioscori	99.84	10239468	0	134	NO	NO	NO	NO
GCF_004023625.1_ASM402362v1	Scaffold	Streptomyces cavernae	99.53	10446772	0	134	NO	NO	NO	NO
GCF_016746085.1_ASM1674608v1	Contig	Zobellella iuensis	95.67	4223911	7	134	YES	YES	YES	YES
GCF_024519315.1_ASM2451931v1	Contig	Streptomyces samsunensis	96.02	11053136	0	134	NO	NO	NO	NO
GCF_900013535.1_AHY_PRJEB12185_v1	Scaffold	Agrobacterium tomkonis CFBP 6623	99.56	5529311	0	134	NO	NO	NO	NO
GCF_900108245.1_IMG-taxon_2622736433_annotated_assembly	Scaffold	Bosea lathyri	100	5918613	0	134	YES	NO	YES	YES
GCF_900108335.1_IMG-taxon_2675903140_annotated_assembly	Scaffold	Nonomuraea solani	91.42	13236837	0	134	NO	NO	NO	NO
GCF_000716435.1_ASM71643v1	Contig	Streptomyces xylophagus	99.49	11386825	0	133	NO	NO	NO	NO
GCF_002149035.1_ASM214903v1	Scaffold	Streptosporangium minutum	94.36	9581188	0	133	NO	NO	NO	NO
GCF_014207985.1_ASM1420798v1	Contig	Nonomuraea rubra	92.29	12876814	0	133	NO	NO	NO	NO
GCF_014645835.1_ASM1464583v1	Scaffold	Streptomyces albiflavescens	100	10892780	0	133	NO	NO	NO	NO
GCF_014930455.1_ASM1493045v1	Contig	Corallococcus soli	95.3	9437609	0	133	NO	NO	YES	NO
GCF_020329485.1_ASM2032948v1	Contig	Bradyrhizobium cenepequi	99.73	8472857	0	133	YES	NO	YES	YES
GCF_900113865.1_IMG-taxon_2667527412_annotated_assembly	Scaffold	Streptosporangium canum	93.41	9273799	0	133	NO	NO	NO	NO
GCF_001189295.1_ASM118929v1	Complete Genome	Chondromyces crocatus	97.96	11388132	0	132	NO	NO	NO	NO
GCF_002286695.1_ASM228669v1	Contig	Streptomyces albireticuli	99.53	8454574	0	132	NO	NO	NO	NO
GCF_003937945.1_ASM393794v1	Scaffold	Amycolatopsis eburnea	99.06	10230128	0	132	NO	NO	NO	NO
GCF_005047355.1_ASM504735v1	Scaffold	Actinacidiphila oryziradicis	98.3	11530635	0	132	NO	NO	NO	NO
GCF_011604665.1_ASM1160466v1	Complete Genome	Bradyrhizobium symbiodeficiens		6920286	0	132	YES	NO	YES	YES
GCF_014764685.1_ASM1476468v1	Contig	Bosea spartocytisi	100	5926429	0	132	NO	NO	NO	NO
GCF_016863635.1_ASM1686363v1	Contig	Virgisporangium aurantiacum	92.32	14096588	0	132	NO	NO	NO	NO
GCF_018603885.1_ASM1860388v1	Scaffold	Sphingobium nicotianae	88.79	4439131	45	132	YES	YES	YES	YES
GCF_020215645.1_ASM2021564v1	Complete Genome	Nonomuraea gerenzanensis	92.82	12066052	0	132	NO	NO	NO	NO
GCF_027922405.1_ASM2792240v1	Scaffold	Dactylosporangium matsuzakiense	95.28	11766240	0	132	NO	NO	NO	NO
GCF_904061905.1_CIP111764	Scaffold	Pseudomonas carbonaria	99.36	5546086	42	132	NO	NO	YES	NO
GCF_000091305.1_ASM9130v1	Complete Genome	Streptomyces scabiei 87.22	100	10148695	0	131	NO	NO	NO	NO
GCF_002234595.1_ASM223459v1	Contig	Amycolatopsis vastitatis	98.59	10670026	0	131	NO	NO	NO	NO
GCF_004011505.1_ASM401150v1	Contig	Nonomuraea polychroma	91.06	11519774	0	131	NO	NO	NO	NO
GCF_009497075.1_ASM949707v1	Complete Genome	Nonomuraea phyllanthi	89.28	11273186	0	131	NO	NO	NO	NO
GCF_012767755.2_ASM1276775v2	Complete Genome	Pseudomonas tohonis	99.04	6826062	1	131	NO	NO	YES	NO
GCF_014199215.1_ASM1419921v1	Contig	Sphingobium boeckii	86.38	4031522	26	131	YES	YES	YES	YES
GCF_014656275.1_ASM1465627v1	Scaffold	Streptomyces umbrinus	99.08	10658486	0	131	NO	NO	NO	NO
GCF_015645445.1_ASM1564544v1	Scaffold	Nonomuraea cypriaca	90.72	11548603	0	131	NO	NO	NO	NO
GCF_016907015.1_ASM1690701v1	Scaffold	Oceanisphaera litoralis	98.3	3356276	37	131	YES	YES	YES	YES
GCF_900099965.1_IMG-taxon_2675903065_annotated_assembly	Scaffold	Nonomuraea jiangxiensis	92.05	11811824	0	131	NO	NO	NO	NO
GCF_001693385.1_ASM169338v1	Complete Genome	Bradyrhizobium icense	99.38	8322773	0	130	YES	NO	YES	YES
GCF_003495225.1_ASM349522v1	Contig	Neisseria polysaccharea		2057444	126	130	YES	YES	YES	YES
GCF_004348455.1_ASM434845v1	Contig	Kribbella albertanoniae	99.93	9727339	0	130	NO	NO	NO	NO
GCF_014196455.1_ASM1419645v1	Contig	Kaistia hirudinis	78	5259388	0	130	YES	NO	YES	YES
GCF_014648055.1_ASM1464805v1	Scaffold	Streptosporangium pseudovulgare	86.28	8586701	0	130	NO	NO	NO	NO
GCF_016734905.1_ASM1673490v1	Scaffold	Sphingopyxis lutea	92.59	3129612	5	130	YES	YES	YES	YES
GCF_016862975.1_ASM1686297v1	Contig	Rugosimonospora africana	93.65	11125243	0	130	NO	NO	NO	NO
GCF_016904885.1_OleMiss_Aprim	Contig	Archangium primigenium	98.42	9491554	0	130	NO	NO	YES	NO
GCF_022271405.1_ASM2227140v1	Contig	Rhodopseudomonas infernalis	97.69	5496629	0	130	YES	NO	YES	YES
GCF_026283965.1_ASM2628396v1	Contig	Dyella subtropica	100	4954565	0	130	YES	YES	YES	YES
GCF_900105375.1_IMG-taxon_2642422554_annotated_assembly	Contig	Rhodococcus jostii	98.15	9912981	0	130	NO	NO	NO	NO
GCF_900115745.1_IMG-taxon_2617270762_annotated_assembly	Contig	Sphingomonas rubra	98.73	3200202	1	130	YES	YES	YES	YES
GCF_000725495.1_Doro.v1.0	Scaffold	Streptomyces aureus	98.86	9928053	0	129	NO	NO	NO	NO
GCF_002305855.1_ASM230585v1	Complete Genome	Melittangium boletus DSM 14713	97.46	9910441	0	129	NO	NO	YES	NO
GCF_010093445.1_ASM1009344v1	Contig	Pseudoxanthomonas japonensis	95.17	4075313	8	129	YES	YES	YES	YES
GCF_016698645.1_ASM1669864v1	Chromosome	Devosia oryziradicis	98.28	3495520	3	129	YES	NO	YES	YES
GCF_016811235.1_ASM1681123v1	Contig	Microvirga arabica	77.17	6671803	0	129	NO	NO	YES	NO
GCF_018531465.1_ASM1853146v1	Contig	Sphaerisporangium fuscum	85.28	10134050	0	129	NO	NO	NO	NO
GCF_029223485.1_ASM2922348v1	Contig	Streptomyces coacervatus	99.57	11291453	0	129	NO	NO	NO	NO
GCF_000725485.1_Doro.v1.0	Scaffold	Nonomuraea candida	91.73	11006208	0	128	NO	NO	NO	NO
GCF_003062295.1_ASM306229v1	Scaffold	Bradyrhizobium algeriense	99.55	8907982	0	128	YES	NO	YES	YES
GCF_003367395.1_ASM336739v1	Chromosome	Pseudolabrys taiwanensis	95.12	5593741	3	128	YES	YES	YES	YES
GCF_003550065.1_ASM355006v1	Scaffold	Hephaestia caeni	99.18	4524961	8	128	YES	YES	YES	YES
GCF_003626895.1_ASM362689v1	Chromosome	Nocardia yunnanensis	96.92	7931441	0	128	NO	NO	NO	NO
GCF_004352805.1_ASM435280v1	Contig	Nonomuraea mesophila	89.22	10138478	0	128	NO	NO	NO	NO
GCF_020542785.1_ASM2054278v1	Complete Genome	Rhodococcus opacus PD630	99.16	9166298	0	128	NO	NO	NO	NO
GCF_027922005.1_ASM2792200v1	Scaffold	Streptosporangium carneum	87.46	9846716	0	128	NO	NO	NO	NO
GCF_027925205.1_ASM2792520v1	Scaffold	Xanthobacter flavus	95.6	5768244	0	128	YES	NO	YES	YES
GCF_029714545.1_ASM2971454v1	Complete Genome	Bradyrhizobium pachyrhizi	100	8851675	0	128	YES	NO	YES	YES
GCF_030294945.1_SGFS_1.0	Complete Genome	Streptomyces graminofaciens	100	11602651	0	128	NO	NO	NO	NO
GCF_000717135.1_ASM71713v1	Contig	Catenuloplanes japonicus	95.54	10971538	0	127	NO	NO	NO	NO
GCF_001005085.2_ASM100508v2	Contig	Streptomyces humi	99.62	10014215	0	127	NO	NO	NO	NO
GCF_001514265.1_ASM151426v1	Scaffold	Streptomyces resistomycificus	100	9179735	0	127	NO	NO	NO	NO
GCF_001542625.1_ASM154262v2	Complete Genome	Streptomyces griseochromogenes	99.15	10764674	0	127	NO	NO	NO	NO
GCF_003350525.1_ASM335052v1	Scaffold	Nocardia mexicana	97.4	8981212	0	127	YES	NO	YES	YES
GCF_004114915.1_ASM411491v1	Complete Genome	Bradyrhizobium guangxiense	99.16	8200121	0	127	YES	NO	YES	YES
GCF_009377205.1_ASM937720v1	Contig	Streptomyces phyllanthi	98.39	10267250	0	127	NO	NO	NO	NO
GCF_011065895.1_ASM1106589v1	Contig	Paludisphaera rhizosphaerae	98.11	8048700	0	127	NO	NO	NO	NO
GCF_013003965.1_ASM1300396v1	Complete Genome	Usitatibacter rugosus	86.15	4563145	42	127	NO	NO	NO	NO
GCF_016862255.1_ASM1686225v1	Contig	Actinoplanes lobatus	92.58	10253485	0	127	NO	NO	YES	NO
GCF_016863275.1_ASM1686327v1	Contig	Planotetraspora mira	82.82	9027692	0	127	NO	NO	NO	NO
GCF_026283925.1_ASM2628392v1	Contig	Dyella halodurans	100	4690078	27	127	YES	YES	YES	YES
GCF_000384215.1_ASM38421v1	Scaffold	Amycolatopsis alba DSM 44262	98.97	9811274	0	126	NO	NO	NO	NO
GCF_000962825.1_ASM96282v1	Contig	Actinoplanes rectilineatus	92.39	10320296	0	126	NO	NO	NO	NO
GCF_001513965.1_ASM151396v1	Scaffold	Streptomyces cellostaticus	99.47	9835283	0	126	NO	NO	NO	NO
GCF_003347665.1_ASM334766v1	Scaffold	Microvirga calopogonii	85.37	7413381	0	126	YES	NO	YES	YES
GCF_008704495.1_ASM870449v1	Complete Genome	Streptomyces kanamyceticus	99.91	10133897	0	126	NO	NO	NO	NO
GCF_009377175.1_ASM937717v1	Contig	Streptomyces adustus	99.91	10226955	0	126	NO	NO	NO	NO
GCF_010450875.1_ASM1045087v1	Complete Genome	Sphingomonas insulae	96.79	3742477	10	126	YES	YES	YES	YES
GCF_011064615.1_ASM1106461v1	Contig	Aquisphaera insulae	97.72	10042636	0	126	NO	NO	NO	NO
GCF_013030075.1_ASM1303007v1	Complete Genome	Neisseria gonorrhoeae	98.51	2171755	153	126	YES	YES	YES	YES
GCF_014643535.1_ASM1464353v1	Contig	Aliidongia dinghuensis	99.56	7372983	35	126	NO	NO	NO	NO
GCF_014650235.1_ASM1465023v1	Scaffold	Streptomyces violaceochromogenes	100	8856784	0	126	NO	NO	NO	NO
GCF_019429485.1_ASM1942948v1	Contig	Sphingomonas citri	99.67	4687655	8	126	YES	YES	YES	YES
GCF_025370095.1_ASM2537009v1	Contig	Sphingomonas alpina	98.64	5195245	20	126	YES	NO	YES	YES
GCF_900113015.1_IMG-taxon_2675903218_annotated_assembly	Contig	Actinoplanes philippinensis	94.53	10381230	0	126	NO	NO	NO	NO
GCF_947179565.1_iyAndHatt1.Wolbachia_sp_1.1	Contig	Wolbachia endosymbiont (group A) of Andrena hattorfiana	94.64	1409226	0	126	YES	NO	YES	YES
GCF_003591655.1_ASM359165v1	Contig	Sphingobium terrigena	94.97	5043023	12	125	YES	YES	YES	YES
GCF_004114975.1_ASM411497v1	Complete Genome	Bradyrhizobium guangdongense	99.26	8437991	0	125	YES	NO	NO	NO
GCF_011045015.1_ASM1104501v1	Contig	Streptomyces scabichelini	99.4	11159245	0	125	NO	NO	NO	NO
GCF_014645815.1_ASM1464581v1	Scaffold	Streptomyces fuscichromogenes	100	11559237	0	125	NO	NO	NO	NO
GCF_014651055.1_ASM1465105v1	Scaffold	Streptomyces fructofermentans	99.13	8872745	0	125	NO	NO	NO	NO
GCF_018129525.1_ASM1812952v1	Contig	Bradyrhizobium denitrificans	99.69	8495489	0	125	YES	NO	YES	YES
GCF_019429605.1_ASM1942960v1	Scaffold	Actinoplanes hulinensis	93.55	9324237	0	125	NO	NO	NO	NO
GCF_023516615.1_ASM2351661v1	Contig	Streptomyces panaciradicis	99.53	9519748	0	125	NO	NO	NO	NO
GCF_023717965.1_ASM2371796v1	Contig	Actinoplanes hotanensis	93.27	10411484	0	125	NO	NO	NO	NO
GCF_024752535.1_ASM2475253v1	Complete Genome	Streptomyces albus	99.05	8033415	0	125	NO	NO	NO	NO
GCF_030036535.1_ASM3003653v1	Complete Genome	Agrobacterium cucumeris	100	5703077	0	125	YES	YES	YES	YES
GCF_000721075.1_ASM72107v1	Contig	Streptosporangium amethystogenes	85.41	9441077	0	124	NO	NO	NO	NO
GCF_001536285.1_IMG-taxon_2634166352_annotated_assembly	Scaffold	Parafrankia irregularis	98.72	9537992	0	124	NO	NO	NO	NO
GCF_002155975.1_ASM215597v1	Scaffold	Amycolatopsis kentuckyensis	96.22	10183912	0	124	NO	NO	NO	NO
GCF_002285905.1_ASM228590v1	Complete Genome	Rickettsia sp. MEAM1 (Bemisia tabaci)	95.62	1378618	12	124	YES	NO	YES	YES
GCF_008634025.1_ASM863402v1	Contig	Streptomyces albofaciens JCM 4342	99.24	9252595	0	124	NO	NO	NO	NO
GCF_013114835.1_ASM1311483v1	Contig	Bradyrhizobium archetypum	99.78	7017218	2	124	YES	NO	YES	YES
GCF_014647675.1_ASM1464767v1	Scaffold	Streptomyces flaveus	99.91	10275661	0	124	NO	NO	NO	NO
GCF_016862035.1_ASM1686203v1	Contig	Actinoplanes campanulatus	94.39	9917308	0	124	NO	NO	NO	NO
GCF_016862455.1_ASM1686245v1	Contig	Actinoplanes utahensis	92.84	9417079	0	124	NO	NO	NO	NO
GCF_018531495.1_ASM1853149v1	Contig	Nonomuraea sediminis	87.85	12091922	0	124	NO	NO	NO	NO
GCF_021568905.1_ASM2156890v1	Contig	Zavarzinia marina	99.11	3954847	0	124	NO	NO	NO	NO
GCF_025264705.1_ASM2526470v1	Complete Genome	Dactylosporangium aurantiacum	95.61	11523879	0	124	NO	NO	NO	NO
GCF_030269445.1_ASM3026944v1	Scaffold	Actinoallomurus iriomotensis	94.41	10971369	0	124	NO	NO	NO	NO
GCF_900111685.1_IMG-taxon_2675903060_annotated_assembly	Scaffold	Nonomuraea wenchangensis	95.1	10051191	0	124	NO	NO	NO	NO
GCF_000499665.2_RMONA_1	Complete Genome	Rickettsia monacensis	94.88	1353450	21	123	YES	NO	YES	YES
GCF_000751075.1_Rickettsia_tamurae_AT-1	Contig	Rickettsia tamurae	97.33	1453216	22	123	YES	NO	YES	YES
GCF_001440475.1_ASM144047v1	Scaffold	Bradyrhizobium lablabi	97.05	8817291	0	123	YES	NO	YES	YES
GCF_001513975.1_ASM151397v1	Scaffold	Streptomyces curacoi	100	8412249	0	123	NO	NO	NO	NO
GCF_001905345.1_ASM190534v1	Scaffold	Streptomyces uncialis	99.53	8883497	0	123	NO	NO	NO	NO
GCF_001983105.1_ASM198310v1	Contig	Pseudofrankia asymbiotica	97.83	9435764	0	123	NO	NO	NO	NO
GCF_003431825.1_ASM343182v1	Complete Genome	Blastomonas fulva	99.18	4123210	29	123	YES	NO	YES	YES
GCF_003626645.1_ASM362664v1	Contig	Streptomyces klenkii	100	8230626	0	123	NO	NO	NO	NO
GCF_003865135.1_ASM386513v1	Contig	Streptomyces chrestomyceticus JCM 4735	95.43	9377418	0	123	NO	NO	NO	NO
GCF_004519335.1_ASM451933v1	Contig	Jiella endophytica	95.92	5252418	0	123	YES	NO	YES	YES
GCF_009687865.1_ASM968786v1	Scaffold	Acrocarpospora macrocephala	88.36	12100308	0	123	NO	NO	NO	NO
GCF_014199325.1_ASM1419932v1	Contig	Sphingomonas yantingensis	95.94	3561452	0	123	YES	YES	YES	YES
GCF_014873765.1_ASM1487376v1	Scaffold	Desulfomicrobium macestii	91.23	4501438	13	123	YES	NO	YES	YES
GCF_018449475.1_ASM1844947v1	Scaffold	Ancylobacter radicis	95.28	4216024	0	123	YES	NO	YES	YES
GCF_019793235.1_ASM1979323v1	Contig	Sphingopyxis jiangsuensis	92.73	3073368	5	123	YES	NO	YES	YES
GCF_020010925.1_ASM2001092v1	Contig	Streptomyces griseiscabiei	94.6	10610750	0	123	NO	NO	NO	NO
GCF_020400655.1_ASM2040065v1	Contig	Streptomyces spinosus	99.15	9172287	0	123	NO	NO	NO	NO
GCF_028401765.1_ASM2840176v1	Contig	Streptomyces gilvifuscus	99.53	9875823	0	123	NO	NO	NO	NO
GCF_001263205.1_ASM126320v1	Complete Genome	Labilithrix luteola	100	12191466	0	122	NO	NO	NO	NO
GCF_011762095.1_ASM1176209v1	Contig	Parvibaculum indicum	97.04	4020083	0	122	YES	YES	YES	YES
GCF_014489635.1_ASM1448963v1	Complete Genome	Streptomyces roseirectus	99.91	9947447	0	122	NO	NO	NO	NO
GCF_014649675.1_ASM1464967v1	Scaffold	Streptomyces janthinus	100	9387529	0	122	NO	NO	NO	NO
GCF_014655715.1_ASM1465571v1	Scaffold	Streptomyces lanatus	100	10216859	0	122	NO	NO	NO	NO
GCF_016103465.1_ASM1610346v1	Contig	Streptomyces sabulosicollis	99.72	10160735	0	122	NO	NO	NO	NO
GCF_016862075.1_ASM1686207v1	Contig	Actinoplanes couchii	92.63	11465012	0	122	NO	NO	NO	NO
GCF_016862895.1_ASM1686289v1	Contig	Planotetraspora kaengkrachanensis	84.23	8768202	0	122	NO	NO	NO	NO
GCF_018304965.1_ASM1830496v1	Contig	Collimonas antrihumi	97.64	4722432	61	122	YES	NO	YES	YES
GCF_019397265.1_ASM1939726v1	Complete Genome	Nonomuraea coxensis DSM 45129	98.45	9073954	0	122	NO	NO	NO	NO
GCF_026342395.1_ASM2634239v1	Contig	Streptomyces prunicolor	100	11335636	0	122	NO	NO	NO	NO
GCF_000158915.1_ASM15891v1	Scaffold	Streptomyces himastatinicus ATCC 53653	93.99	11030030	0	121	NO	NO	NO	NO
GCF_001189235.2_ASM118923v2	Contig	Bradyrhizobium embrapense	99.96	8267832	0	121	YES	NO	YES	YES
GCF_001440035.1_ABySSBR3351v1	Scaffold	Bradyrhizobium manausense	96.51	9145311	0	121	YES	NO	YES	YES
GCF_002025725.1_ASM202572v1	Complete Genome	Herbaspirillum robiniae	95.01	5445269	0	121	YES	YES	YES	YES
GCF_002868735.1_ASM286873v1	Complete Genome	Niveispirillum cyanobacteriorum	100	6048780	0	121	NO	NO	NO	NO
GCF_004365405.1_ASM436540v1	Scaffold	Oceanimonas baumannii	97.28	3749952	6	121	YES	YES	YES	YES
GCF_011764425.1_ASM1176442v1	Contig	Phytohabitans houttuyneae	86.9	11342817	0	121	NO	NO	NO	NO
GCF_017068395.1_ASM1706839v1	Complete Genome	Rhodococcus pseudokoreensis	99.45	9866560	0	121	NO	NO	NO	NO
GCF_024496245.1_ASM2449624v1	Complete Genome	Sphingomonas qomolangmaensis	98.71	3429145	5	121	YES	NO	YES	NO
GCF_030160115.1_ASM3016011v1	Scaffold	Devosia nitrariae	98.52	5544318	0	121	YES	NO	YES	YES
GCF_900100665.1_IMG-taxon_2617270882_annotated_assembly	Scaffold	Pelagibacterium luteolum	98.93	4296818	0	121	YES	NO	YES	YES
GCF_000717335.1_ASM71733v1	Contig	Amycolatopsis jejuensis	98.56	10103604	0	120	NO	NO	NO	NO
GCF_001514035.1_ASM151403v1	Scaffold	Streptomyces yokosukanensis	99.81	10159272	0	120	NO	NO	NO	NO
GCF_001514235.1_ASM151423v1	Scaffold	Streptomyces caeruleatus	99.95	10290495	0	120	NO	NO	NO	NO
GCF_002954775.1_ASM295477v1	Scaffold	Streptomyces geranii	89.44	10196536	0	120	NO	NO	NO	NO
GCF_006547165.1_ASM654716v1	Scaffold	Streptomyces ipomoeae	99.91	10892772	0	120	NO	NO	NO	NO
GCF_007474605.1_ASM747460v1	Contig	Rhodoligotrophos appendicifer	99.19	5593515	0	120	YES	NO	YES	YES
GCF_009377235.1_ASM937723v1	Contig	Streptomyces acidicola	99.24	10256521	0	120	NO	NO	NO	NO
GCF_012927045.1_ASM1292704v1	Scaffold	Azohydromonas caseinilytica	99.52	6654139	30	120	NO	NO	NO	NO
GCF_013114825.1_ASM1311482v1	Contig	Bradyrhizobium australiense	99.69	7436256	0	120	YES	NO	NO	NO
GCF_014534645.1_ASM1453464v1	Scaffold	Streptomyces griseicoloratus	100	8825450	0	120	NO	NO	NO	NO
GCF_014654205.1_ASM1465420v1	Contig	Amycolatopsis bullii	99.06	9379520	0	120	NO	NO	NO	NO
GCF_016863095.1_ASM1686309v1	Contig	Microbispora siamensis	84.65	9393388	0	120	NO	NO	NO	NO
GCF_017592555.1_ASM1759255v1	Scaffold	Actinoplanes flavus	92.57	9683788	0	120	NO	NO	NO	NO
GCF_018255875.1_ASM1825587v1	Complete Genome	Streptomyces lavendulae subsp. lavendulae	100	8035918	0	120	NO	NO	NO	NO
GCF_020521275.1_ASM2052127v1	Contig	Streptomyces daghestanicus	100	8219361	0	120	NO	NO	NO	NO
GCF_021474425.1_ASM2147442v1	Contig	Streptomyces muensis	100	9891217	0	120	NO	NO	NO	NO
GCF_022698165.1_ASM2269816v1	Contig	Streptomyces cylindrosporus	99.91	10929167	0	120	NO	NO	NO	NO
GCF_025137375.1_ASM2513737v1	Complete Genome	Dactylosporangium fulvum	97.35	10494953	0	120	NO	NO	NO	NO
GCF_900105945.1_IMG-taxon_2634166899_annotated_assembly	Contig	Amycolatopsis tolypomycina	98.65	10363431	0	120	NO	NO	NO	NO
GCF_902497555.1_ASM90249755v1	Contig	Amycolatopsis camponoti	98.17	10560374	0	120	NO	NO	NO	NO
GCF_000242715.1_ASM24271v2	Contig	Streptomyces acidiscabies 84-104	99.15	11005945	0	119	NO	NO	NO	NO
GCF_000376565.1_ASM37656v1	Contig	Streptomyces hokutonensis	99.62	11828360	0	119	NO	NO	NO	NO
GCF_000725475.1_Doro.v1.0	Scaffold	Streptomyces durhamensis	99.47	9312374	0	119	NO	NO	NO	NO
GCF_000725745.1_Doro.v1.0	Scaffold	Streptomyces aureocirculatus	98.9	9315748	0	119	NO	NO	NO	NO
GCF_000949865.1_ASM94986v1	Contig	Rhizobium nepotum 39/7	98.49	5328872	0	119	NO	NO	NO	NO
GCF_000988945.1_ASM98894v1	Contig	Streptomyces europaeiscabiei	98.11	9982072	0	119	NO	NO	NO	NO
GCF_001509475.1_ASM150947v1	Contig	Streptomyces regalis	100	10954269	0	119	NO	NO	NO	NO
GCF_001542415.1_ASM154241v1	Scaffold	Bradyrhizobium macuxiense	97.92	8722143	0	119	YES	NO	YES	YES
GCF_002154375.1_ASM215437v1	Scaffold	Streptomyces glaucescens	97.82	8426988	0	119	NO	NO	NO	NO
GCF_002154505.1_ASM215450v1	Scaffold	Streptomyces carpinensis	98.9	10405645	0	119	NO	NO	NO	NO
GCF_005889735.1_ASM588973v1	Contig	Nonomuraea turkmeniaca	89.45	11350886	0	119	NO	NO	NO	NO
GCF_006385875.1_ASM638587v1	Contig	Sandaracinobacter neustonicus	98.5	3650352	0	119	YES	NO	YES	YES
GCF_007827045.1_ASM782704v1	Scaffold	Trebonia kvetii	90.97	9254646	0	119	NO	NO	NO	NO
GCF_008312845.1_ASM831284v1	Scaffold	Streptomyces cacaoi	98.14	8578932	0	119	NO	NO	NO	NO
GCF_014203605.1_ASM1420360v1	Scaffold	Planomonospora venezuelensis	83.92	8185542	0	119	NO	NO	NO	NO
GCF_016107395.1_INACH3013-01	Contig	Streptomyces fildesensis	99.62	9398443	0	119	NO	NO	NO	NO
GCF_019904175.1_ASM1990417v1	Complete Genome	Dactylosporangium vinaceum	94.19	11959907	0	119	NO	NO	NO	NO
GCF_900102095.1_IMG-taxon_2667527442_annotated_assembly	Scaffold	Streptomyces jietaisiensis	99.94	7681257	0	119	NO	NO	NO	NO
GCF_900114325.1_IMG-taxon_2651870113_annotated_assembly	Scaffold	Rhodanobacter glycinis	76.74	3865941	0	119	YES	NO	YES	YES
GCF_000383595.1_ASM38359v1	Scaffold	Streptomyces bottropensis ATCC 25435	100	8955726	0	118	NO	NO	NO	NO
GCF_000830005.1_ASM83000v1	Complete Genome	Streptomyces vietnamensis	99.53	9153777	0	118	NO	NO	NO	NO
GCF_002155905.1_ASM215590v1	Scaffold	Streptomyces tricolor	94.37	8832356	0	118	NO	NO	NO	NO
GCF_003387475.1_ASM338747v1	Contig	Kutzneria buriramensis	99.4	11968322	0	118	NO	NO	NO	NO
GCF_013283785.1_ASM1328378v1	Contig	Nonomuraea antri	89.44	11667904	0	118	NO	NO	NO	NO
GCF_013340935.1_ASM1334093v1	Contig	Azospirillum melinis	96.01	7970174	9	118	NO	NO	NO	NO
GCF_016785085.1_ASM1678508v1	Contig	Actinoplanes lichenicola	93.13	10674089	0	118	NO	NO	NO	NO
GCF_018070025.1_ASM1807002v1	Scaffold	Streptomyces liliiviolaceus	99.37	11133145	0	118	NO	NO	NO	NO
GCF_020616555.1_ASM2061655v1	Complete Genome	Streptomyces longhuiensis	99.87	10018810	0	118	NO	NO	NO	NO
GCF_000429925.1_ASM42992v1	Scaffold	Desulfatirhabdium butyrativorans DSM 18734	99.71	4481975	0	117	NO	NO	NO	NO
GCF_001705785.1_ASM170578v1	Scaffold	Streptomyces hygroscopicus subsp. hygroscopicus	99.72	10242506	0	117	NO	NO	NO	NO
GCF_003050705.1_ASM305070v1	Scaffold	Sphingomonas aurantiaca	98.93	4411230	3	117	YES	YES	YES	YES
GCF_003148905.1_ASM314890v1	Scaffold	Fulvimonas soli	99.87	3768430	23	117	YES	NO	NO	NO
GCF_008704445.1_ASM870444v1	Complete Genome	Streptomyces prasinus	99.91	7647592	0	117	NO	NO	NO	NO
GCF_009687885.1_ASM968788v1	Scaffold	Acrocarpospora pleiomorpha	85.62	11762885	0	117	NO	NO	NO	NO
GCF_009688965.1_ASM968896v1	Complete Genome	Desulfosarcina widdelii	99.18	7297718	5	117	YES	YES	YES	YES
GCF_014205155.1_ASM1420515v1	Contig	Amycolatopsis umgeniensis	84.09	9225930	0	117	NO	NO	NO	NO
GCF_014493765.1_ASM1449376v1	Contig	Streptomyces polyasparticus	100	10155139	0	117	NO	NO	NO	NO
GCF_014650735.1_ASM1465073v1	Scaffold	Streptomyces canarius	99.53	10647065	0	117	NO	NO	NO	NO
GCF_014650915.1_ASM1465091v1	Scaffold	Streptomyces poonensis	99.91	8584687	0	117	NO	NO	NO	NO
GCF_014873535.1_ASM1487353v1	Contig	Nonomuraea africana	86.57	9694534	0	117	NO	NO	NO	NO
GCF_015356865.1_ASM1535686v1	Contig	Catenulispora pinisilvae	99.83	11469319	0	117	NO	NO	NO	NO
GCF_016745505.1_ASM1674550v1	Contig	Streptomyces silvae	100	7963858	0	117	NO	NO	NO	NO
GCF_020521255.1_ASM2052125v1	Contig	Streptomyces hydrogenans	99.62	10194241	0	117	NO	NO	NO	NO
GCF_021441825.1_ASM2144182v1	Complete Genome	Streptomyces spinosirectus	100	8624193	0	117	NO	NO	NO	NO
GCF_025175675.1_ASM2517567v1	Contig	Sedimenticola hydrogenitrophicus	97.95	4713368	3	117	NO	NO	YES	NO
GCF_000454025.1_ASM45402v1	Complete Genome	Amycolatopsis mediterranei RB	96.93	10246864	0	116	NO	NO	NO	NO
GCF_000494755.1_ASM49475v1	Complete Genome	Actinoplanes friuliensis DSM 7358	92.26	9376071	0	116	NO	NO	NO	NO
GCF_002261115.1_ASM226111v1	Scaffold	Streptomyces kasugaensis	100	9262443	0	116	NO	NO	NO	NO
GCF_003096275.1_ASM309627v1	Scaffold	Sphingomonas pokkalii	98.45	4223965	18	116	YES	NO	YES	YES
GCF_003323715.1_ASM332371v1	Scaffold	Streptomyces diacarni	98.58	7661915	0	116	NO	NO	NO	NO
GCF_003515075.1_ASM351507v1	Scaffold	Sphingomonas gilva	98.98	3541169	3	116	YES	NO	YES	YES
GCF_004284595.1_ASM428459v1	Contig	Pseudoxanthomonas winnipegensis	95.19	4579861	67	116	YES	YES	YES	YES
GCF_004322705.1_ASM432270v1	Contig	Dyella terrae	100	4224523	2	116	YES	NO	YES	YES
GCF_005795905.1_ASM579590v1	Contig	Streptomyces marianii	99.19	9010366	0	116	NO	NO	NO	NO
GCF_006546775.1_ASM654677v1	Contig	Lysobacter aestuarii	88.13	3491084	1	116	YES	NO	YES	NO
GCF_008704715.1_ASM870471v1	Complete Genome	Streptomyces chartreusis	100	9912098	0	116	NO	NO	NO	NO
GCF_014050225.1_ASM1405022v1	Scaffold	Stappia albiluteola	99.8	4370822	0	116	YES	NO	YES	YES
GCF_014202475.1_ASM1420247v1	Scaffold	Streptomyces paradoxus	99.91	8584772	0	116	NO	NO	NO	NO
GCF_014650515.1_ASM1465051v1	Scaffold	Streptomyces finlayi	99.43	9487627	0	116	NO	NO	NO	NO
GCF_014650995.1_ASM1465099v1	Scaffold	Streptomyces viridiviolaceus	99.91	9134388	0	116	NO	NO	NO	NO
GCF_014873875.1_ASM1487387v1	Contig	Actinopolymorpha pittospori	97.48	10562590	0	116	NO	NO	NO	NO
GCF_017876625.1_ASM1787662v1	Contig	Streptomyces syringium	99.91	7715887	0	116	NO	NO	NO	NO
GCF_019857225.1_ASM1985722v1	Contig	Streptomyces plumbidurans	100	8642823	0	116	NO	NO	NO	NO
GCF_022698145.1_ASM2269814v1	Contig	Streptomyces spinosisporus	100	9406843	0	116	NO	NO	NO	NO
GCF_022899935.1_ASM2289993v1	Scaffold	Shinella curvata	95.72	6076148	0	116	NO	NO	NO	NO
GCF_024703995.1_ASM2470399v1	Contig	Amycolatopsis iheyensis	98.9	10438610	0	116	NO	NO	NO	NO
GCF_026229585.1_ASM2622958v1	Scaffold	Nocardia zapadnayensis	98.53	10805499	0	116	NO	NO	NO	NO
GCF_027270315.1_ASM2727031v1	Complete Genome	Streptomyces cinnabarinus	99.85	9621721	0	116	NO	NO	NO	NO
GCF_913919575.1_CMBFB	Scaffold	Streptomyces coriariae	100	9331620	0	116	NO	NO	NO	NO
GCF_000172155.1_ASM17215v1	Complete Genome	Verrucomicrobium spinosum DSM 4136 = JCM 18804	99.62	8220857	0	115	NO	NO	YES	NO
GCF_000380505.1_ASM38050v1	Contig	Kaistia granuli DSM 23481	97.86	4766107	0	115	YES	YES	YES	YES
GCF_000717055.1_ASM71705v1	Contig	Streptomyces iakyrus	99.91	9127873	0	115	NO	NO	NO	NO
GCF_000721705.1_ASM72170v1	Contig	Actinoplanes subtropicus	93.72	11257336	0	115	NO	NO	NO	NO
GCF_001027185.1_ASM102718v1	Chromosome	Streptomyces incarnatus	99.62	8897465	0	115	NO	NO	NO	NO
GCF_001440415.1_ASM144041v1	Contig	Bradyrhizobium retamae	99.26	8466225	0	115	YES	NO	YES	YES
GCF_001611795.1_ASM161179v1	Complete Genome	Streptomyces qaidamensis	99.81	9083372	0	115	NO	NO	NO	NO
GCF_003313395.1_ASM331339v1	Contig	Nonomuraea lactucae	85.22	8673472	0	115	NO	NO	NO	NO
GCF_004348995.1_ASM434899v1	Contig	Nonomuraea terrae	89.06	9687995	0	115	NO	NO	NO	NO
GCF_004349215.1_ASM434921v1	Contig	Actinomadura rubrisoli	94.5	10227186	0	115	NO	NO	NO	NO
GCF_008728085.1_ASM872808v1	Scaffold	Microbispora cellulosiformans	80.85	8445470	0	115	NO	NO	NO	NO
GCF_009827055.1_ASM982705v1	Contig	Shinella kummerowiae	99.67	6349068	0	115	YES	NO	YES	YES
GCF_013004005.1_ASM1300400v1	Complete Genome	Pelagibacterium halotolerans	98.11	3962298	0	115	YES	NO	YES	YES
GCF_013363975.1_ASM1336397v1	Scaffold	Nonomuraea montanisoli	89.2	9762852	0	115	NO	NO	NO	NO
GCF_014650595.1_ASM1465059v1	Contig	Streptomyces alanosinicus	100	10244856	0	115	NO	NO	NO	NO
GCF_014654675.1_ASM1465467v1	Scaffold	Streptomyces spiralis	100	9813663	0	115	NO	NO	NO	NO
GCF_014892245.1_ASM1489224v1	Scaffold	Microbispora sitophila	85.74	10088235	0	115	NO	NO	NO	NO
GCF_016862095.1_ASM1686209v1	Contig	Actinoplanes cyaneus	95.98	10358347	0	115	NO	NO	NO	NO
GCF_016862795.1_ASM1686279v1	Contig	Dactylosporangium siamense	96.64	12716640	0	115	NO	NO	NO	NO
GCF_016863015.1_ASM1686301v1	Contig	Microbispora amethystogenes	81.74	8135544	0	115	NO	NO	NO	NO
GCF_016863295.1_ASM1686329v1	Contig	Planotetraspora phitsanulokensis	84.92	9167700	0	115	NO	NO	NO	NO
GCF_020329505.1_ASM2032950v1	Contig	Bradyrhizobium semiaridum	99.48	6712655	0	115	YES	NO	YES	YES
GCF_021261325.1_ASM2126132v1	Scaffold	Streptomyces guryensis	99.24	10492733	0	115	NO	NO	NO	NO
GCF_025370105.1_ASM2537010v1	Contig	Sphingomonas hylomeconis	98.98	3899003	0	115	YES	YES	YES	YES
GCF_030160275.1_ASM3016027v1	Scaffold	Dyella flagellata	99.4	5512562	41	115	YES	YES	YES	YES
GCF_900114595.1_IMG-taxon_2675903163_annotated_assembly	Scaffold	Desulfomicrobium norvegicum	94.2	4352996	20	115	NO	NO	YES	NO
GCF_900142575.1_IMG-taxon_2667527448_annotated_assembly	Scaffold	Actinacidiphila paucisporea	98.39	8164374	0	115	NO	NO	NO	NO
GCF_000067165.1_ASM6716v1	Complete Genome	Sorangium cellulosum So ce56	97.96	13033779	0	114	NO	NO	YES	NO
GCF_000284295.1_ASM28429v1	Complete Genome	Actinoplanes missouriensis 431	98.5	8773466	0	114	NO	NO	NO	NO
GCF_000717595.1_ASM71759v1	Contig	Streptomyces flavochromogenes	99.81	8884918	0	114	NO	NO	NO	NO
GCF_000829315.1_ASM82931v1	Complete Genome	Wolbachia endosymbiont of Cimex lectularius	97.27	1250060	0	114	NO	NO	NO	NO
GCF_001440395.1_ASM144039v1	Scaffold	Bradyrhizobium jicamae	99.66	8738846	0	114	YES	NO	YES	YES
GCF_001514145.1_ASM151414v1	Scaffold	Streptomyces canus	100	11570753	0	114	NO	NO	NO	NO
GCF_013761175.1_ASM1376117v1	Scaffold	Nonomuraea soli	87.68	10086809	0	114	NO	NO	NO	NO
GCF_014202765.1_ASM1420276v1	Scaffold	Silvimonas terrae	99.03	4826664	66	114	YES	YES	YES	YES
GCF_015477355.1_ASM1547735v1	Contig	Nocardia blacklockiae	99.01	7934999	0	114	YES	NO	YES	YES
GCF_015482775.1_ASM1548277v1	Complete Genome	Kaustia mangrovi	94.1	4630536	27	114	YES	YES	YES	YES
GCF_016734765.1_ASM1673476v1	Contig	Microvirga soli	79.33	6245577	0	114	YES	YES	YES	YES
GCF_016863355.1_ASM1686335v1	Contig	Sphaerisporangium krabiense	83.02	8521302	0	114	NO	NO	NO	NO
GCF_016863415.1_ASM1686341v1	Contig	Sphaerisporangium siamense	83.39	8443032	0	114	NO	NO	NO	NO
GCF_030160835.1_ASM3016083v1	Scaffold	Labrys miyagiensis	97.36	7783961	0	114	YES	NO	YES	YES
GCF_900119165.1_IMG-taxon_2642422517_annotated_assembly	Contig	Amycolatopsis australiensis	99.03	9312140	0	114	NO	NO	NO	NO
GCF_000576635.1_genome	Contig	Skermanella stibiiresistens SB22	99.56	7868338	0	113	YES	NO	YES	YES
GCF_001741865.1_ASM174186v1	Complete Genome	Bosea vaviloviae	99.8	6713548	0	113	YES	NO	YES	YES
GCF_002850745.1_ASM285074v1	Scaffold	Nonomuraea indica	87.36	8289263	0	113	NO	NO	NO	NO
GCF_003053845.1_ASM305384v1	Contig	Breoghania corrubedonensis	99.59	5331589	4	113	YES	NO	YES	YES
GCF_003315795.1_ASM331579v1	Contig	Spongiactinospora rosea	80.19	9809379	0	113	NO	NO	NO	NO
GCF_013344475.1_ASM1334447v1	Scaffold	Martelella limonii	94.04	4539380	0	113	YES	NO	YES	YES
GCF_014204945.1_ASM1420494v1	Contig	Allocatelliglobosispora scoriae	92.27	9149827	0	113	NO	NO	NO	NO
GCF_014648915.1_ASM1464891v1	Scaffold	Streptomyces phaeofaciens	100	10444272	0	113	NO	NO	NO	NO
GCF_014649495.1_ASM1464949v1	Scaffold	Streptomyces filipinensis	99.82	9249383	0	113	NO	NO	NO	NO
GCF_014649515.1_ASM1464951v1	Scaffold	Streptomyces pilosus	100	7585172	0	113	NO	NO	NO	NO
GCF_014653855.1_ASM1465385v1	Scaffold	Streptomyces capitiformicae	99.78	10755081	0	113	NO	NO	NO	NO
GCF_016653355.1_ASM1665335v1	Scaffold	Rhodoplanes elegans	96.83	6538588	0	113	YES	NO	YES	YES
GCF_016743775.1_ASM1674377v1	Contig	Microvirga aerilata	75.92	6832235	0	113	NO	NO	NO	NO
GCF_016743795.2_ASM1674379v2	Complete Genome	Rickettsia tillamookensis	99.69	1438972	12	113	YES	NO	YES	YES
GCF_017939625.1_ASM1793962v1	Scaffold	Pseudoxanthomonas helianthi	86.33	3588529	22	113	YES	YES	YES	YES
GCF_018332655.1_ASM1833265v1	Contig	Actinoplanes auranticolor	89.92	9878734	0	113	NO	NO	NO	NO
GCF_018476525.1_ASM1847652v1	Scaffold	Acrocarpospora catenulata	84.9	10292507	0	113	NO	NO	NO	NO
GCF_018982885.2_ASM1898288v2	Complete Genome	Polymorphobacter megasporae	99.23	4894723	0	113	NO	NO	NO	NO
GCF_019399205.1_ASM1939920v1	Scaffold	Streptomyces poriferorum	98.71	9034630	0	113	NO	NO	NO	NO
GCF_900114115.1_IMG-taxon_2622736590_annotated_assembly	Scaffold	Desulfomicrobium apsheronum	91.47	4254075	12	113	NO	NO	NO	NO
GCF_000166135.1_ASM16613v1	Complete Genome	Pseudofrankia inefficax	98.43	8815781	0	112	NO	NO	NO	NO
GCF_000372745.1_ASM37274v1	Scaffold	Embleya scabrispora DSM 41855	94.4	11392659	0	112	NO	NO	NO	NO
GCF_000716785.1_ASM71678v1	Contig	Amycolatopsis vancoresmycina	98.84	9837652	0	112	NO	NO	NO	NO
GCF_001418415.1_ASM141841v1	Scaffold	Streptomyces hirsutus	95.8	8506297	0	112	NO	NO	NO	NO
GCF_001642995.1_ASM164299v1	Contig	Streptomyces jeddahensis	99.91	8449625	0	112	NO	NO	NO	NO
GCF_002946835.1_ASM294683v1	Complete Genome	Streptomyces dengpaensis	99.91	8710171	0	112	NO	NO	NO	NO
GCF_003236395.1_ASM323639v1	Contig	Nonomuraea aridisoli	88.54	9868672	0	112	NO	NO	NO	NO
GCF_003577475.1_ASM357747v1	Scaffold	Salinibius halmophilus	96.47	3700607	49	112	YES	YES	YES	YES
GCF_003696215.1_ASM369621v1	Scaffold	Actinomadura harenae	95.51	9356375	0	112	NO	NO	NO	NO
GCF_004362215.1_ASM436221v1	Contig	Actinoplanes brasiliensis	92.94	9750342	0	112	NO	NO	NO	NO
GCF_006874475.1_ASM687447v1	Contig	Microbispora hainanensis	84.34	8717787	0	112	NO	NO	NO	NO
GCF_007833165.1_ASM783316v1	Contig	Caenimonas sedimenti	98.54	5910442	29	112	NO	NO	YES	NO
GCF_013410775.1_ASM1341077v1	Contig	Sphaerotilus montanus	99.15	5068925	0	112	YES	YES	YES	YES
GCF_014207745.1_ASM1420774v1	Contig	Nonomuraea muscovyensis	89.59	9231644	0	112	NO	NO	NO	NO
GCF_014647875.1_ASM1464787v1	Scaffold	Streptomyces brasiliensis	99.91	10696112	0	112	NO	NO	NO	NO
GCF_015704865.1_ASM1570486v1	Scaffold	Actinoplanes aureus	95.07	10742306	0	112	NO	NO	NO	NO
GCF_016743815.1_ASM1674381v1	Complete Genome	Sphingomonas aliaeris	90.4	4262007	33	112	YES	YES	YES	YES
GCF_016863335.1_ASM1686333v1	Contig	Planotetraspora thailandica	82.43	8961068	0	112	NO	NO	NO	NO
GCF_019898765.1_ASM1989876v1	Contig	Sphingomonas yunnanensis	95.22	4445204	10	112	YES	NO	YES	YES
GCF_021028635.1_ASM2102863v1	Complete Genome	Streptomyces huasconensis	100	8236582	0	112	NO	NO	NO	NO
GCF_024648845.1_ASM2464884v1	Scaffold	Actinomadura glauciflava	97.2	9357102	0	112	NO	NO	NO	NO
GCF_024666385.1_ASM2466638v1	Complete Genome	Streptomyces yangpuensis	99.51	8092115	0	112	NO	NO	NO	NO
GCF_026626665.1_ASM2662666v1	Contig	Nannocystis pusilla	92.6	11987768	0	112	NO	NO	NO	NO
GCF_028863365.1_ASM2886336v1	Contig	Streptomyces neyagawaensis	99.62	9979945	0	112	NO	NO	NO	NO
GCF_000220705.2_ASM22070v2	Complete Genome	Streptomyces xinghaiensis S187	98.39	7137891	0	111	NO	NO	NO	NO
GCF_001854655.1_ASM185465v1	Contig	Parafrankia colletiae	99.19	8361025	0	111	NO	NO	NO	NO
GCF_002796605.1_ASM279660v1	Complete Genome	Sphingomonas psychrotolerans	98.78	5038478	0	111	YES	NO	YES	YES
GCF_004345645.1_ASM434564v1	Scaffold	Actinocrispum wychmicini	100	12011259	0	111	NO	NO	NO	NO
GCF_008329925.1_ASM832992v1	Complete Genome	Sphaerotilus sulfidivorans	99.72	4430992	2	111	NO	NO	NO	NO
GCF_014204985.1_ASM1420498v1	Contig	Streptosporangium becharense	85.51	7824014	0	111	NO	NO	NO	NO
GCF_014646055.1_ASM1464605v1	Contig	Wenjunlia tyrosinilytica	99.24	8492734	0	111	NO	NO	NO	NO
GCF_014649655.1_ASM1464965v1	Scaffold	Streptomyces humidus	99.62	9711080	0	111	NO	NO	NO	NO
GCF_016755875.1_ASM1675587v1	Contig	Streptomyces spororaveus	100	8857713	0	111	NO	NO	NO	NO
GCF_016863035.1_ASM1686303v1	Contig	Microbispora corallina	83.62	8361641	0	111	NO	NO	NO	NO
GCF_020312215.1_ASM2031221v1	Contig	Streptomyces solaniscabiei	100	8274229	0	111	NO	NO	NO	NO
GCF_025399795.1_ASM2539979v1	Contig	Streptomyces rhizosphaerihabitans	99.62	10215804	0	111	NO	NO	NO	NO
GCF_025506355.1_ASM2550635v1	Scaffold	Sphaerisporangium corydalis	85.28	9479577	0	111	NO	NO	NO	NO
GCF_027620355.1_ASM2762035v1	Contig	Nonomuraea ferruginea	90.1	9190888	0	111	NO	NO	NO	NO
GCF_029714345.1_ASM2971434v1	Complete Genome	Bradyrhizobium brasilense	99.65	8976199	1	111	YES	NO	YES	YES
GCF_900143005.1_IMG-taxon_2700988713_annotated_assembly	Scaffold	Cryptosporangium aurantiacum	98.85	9579923	0	111	NO	NO	NO	NO
GCF_000154965.1_ASM15496v1	Chromosome	Streptomyces sviceus ATCC 29083	97.32	9313494	0	110	NO	NO	NO	NO
GCF_000384295.1_ASM38429v1	Scaffold	Amycolatopsis balhimycina FH 1894	98.98	10858503	0	110	NO	NO	NO	NO
GCF_000717025.1_ASM71702v1	Contig	Streptomyces atroolivaceus	99.56	8216207	0	110	NO	NO	NO	NO
GCF_000725785.1_Doro.v1.0	Scaffold	Streptomyces flavovariabilis	100	8762262	0	110	NO	NO	NO	NO
GCF_000943515.2_ASM94351v2	Complete Genome	Amycolatopsis orientalis	98.76	9490992	0	110	NO	NO	NO	NO
GCF_000955965.1_ASM95596v1	Contig	Streptomyces variegatus	100	8775595	0	110	NO	NO	NO	NO
GCF_001514055.1_ASM151405v1	Scaffold	Streptomyces corchorusii	99.53	10309547	0	110	NO	NO	NO	NO
GCF_001598375.1_ASM159837v1	Contig	Novosphingobium capsulatum NBRC 12533	96.11	4836455	2	110	YES	NO	YES	YES
GCF_001612945.1_ASM161294v1	Contig	Nocardia inohanensis NBRC 100128	96.46	8118011	0	110	NO	NO	NO	NO
GCF_001701025.1_ASM170102v1	Complete Genome	Lentzea guizhouensis	97.74	9997872	0	110	NO	NO	NO	NO
GCF_001886595.1_ASM188659v1	Complete Genome	Streptomyces venezuelae	99.91	8380320	0	110	NO	NO	NO	NO
GCF_002891435.1_ASM289143v1	Contig	Streptomyces cahuitamycinicus	99.4	9035421	0	110	NO	NO	NO	NO
GCF_002995495.1_ASM299549v1	Scaffold	Actinocorallia populi	94.86	8253623	0	110	NO	NO	NO	NO
GCF_003259845.1_ASM325984v1	Scaffold	Actinoplanes lutulentus	95.01	9887594	0	110	NO	NO	NO	NO
GCF_004348415.1_ASM434841v1	Contig	Streptomyces hainanensis	96.15	7991366	0	110	NO	NO	NO	NO
GCF_004364325.1_ASM436432v1	Contig	Actinophytocola oryzae	99.92	10706011	0	110	NO	NO	NO	NO
GCF_005786655.1_ASM578665v1	Scaffold	Streptomyces montanus	99.91	10225480	0	110	NO	NO	NO	NO
GCF_008704395.1_ASM870439v1	Complete Genome	Streptomyces alboniger	99.91	7962786	0	110	NO	NO	NO	NO
GCF_012927085.1_ASM1292708v1	Contig	Ramlibacter agri	95.73	7200642	14	110	NO	NO	NO	NO
GCF_014203895.1_ASM1420389v1	Scaffold	Streptomyces nymphaeiformis	99.53	9225538	0	110	NO	NO	NO	NO
GCF_014646515.1_ASM1464651v1	Scaffold	Nonomuraea glycinis	88.63	9635644	0	110	NO	NO	NO	NO
GCF_014925385.1_ASM1492538v1	Contig	Pelagibius marinus	98.73	5437350	0	110	YES	YES	YES	YES
GCF_015710995.1_ASM1571099v1	Complete Genome	Streptomyces gardneri	99.91	9054805	0	110	NO	NO	NO	NO
GCF_016863315.1_ASM1686331v1	Contig	Planotetraspora silvatica	81.49	8664980	0	110	NO	NO	NO	NO
GCF_016863375.1_ASM1686337v1	Contig	Sphaerisporangium melleum	83.24	8642818	0	110	NO	NO	NO	NO
GCF_017573505.1_ASM1757350v1	Contig	Actinomadura barringtoniae	97.26	11715108	0	110	NO	NO	NO	NO
GCF_019039035.1_ASM1903903v1	Contig	Citreicoccus inhibens	98.05	9046820	0	110	NO	NO	YES	NO
GCF_023276435.1_ASM2327643v1	Scaffold	Sphaerisporangium perillae	85.03	9305943	0	110	NO	NO	NO	NO
GCF_028435365.1_ASM2843536v1	Scaffold	Polyangium jinanense	97.96	13810691	0	110	NO	NO	NO	NO
GCF_900104215.1_IMG-taxon_2596583601_annotated_assembly	Contig	Desulfonatronum thiosulfatophilum	99.46	3602125	33	110	YES	YES	YES	YES
GCF_000024025.1_ASM2402v1	Complete Genome	Catenulispora acidiphila DSM 44928	99.58	10467782	0	109	NO	NO	NO	NO
GCF_000379645.1_ASM37964v1	Scaffold	Actinoplanes globisporus DSM 43857	98.15	10988507	0	109	NO	NO	NO	NO
GCF_000383915.1_ASM38391v1	Scaffold	Amycolatopsis benzoatilytica AK 16/65	99.06	8704271	0	109	NO	NO	NO	NO
GCF_000725545.1_Doro.v1.0	Scaffold	Streptomyces exfoliatus	99.34	7874957	0	109	NO	NO	NO	NO
GCF_001653075.1_Psphaerica_assembly01	Contig	Planomonospora sphaerica	83.06	8132638	0	109	NO	NO	NO	NO
GCF_002374835.1_ASM237483v1	Contig	Sphingomonas ginsenosidimutans	99.76	3900947	0	109	YES	NO	NO	NO
GCF_002911015.1_ASM291101v1	Scaffold	Streptomyces populi	99.62	9587301	0	109	NO	NO	NO	NO
GCF_003261055.1_ASM326105v1	Complete Genome	Streptomyces cadmiisoli	100	10239272	0	109	NO	NO	NO	NO
GCF_003751225.1_ASM375122v1	Contig	Actinocorallia herbida	94.3	9800715	0	109	NO	NO	NO	NO
GCF_003865155.1_ASM386515v1	Contig	Streptomyces paromomycinus	99.24	9705398	0	109	NO	NO	NO	NO
GCF_003963535.1_ASM396353v1	Complete Genome	Streptomyces cyaneochromogenes	99.95	10677137	0	109	NO	NO	NO	NO
GCF_003999975.1_ASM399997v1	Contig	Actinoplanes solisilvae	92.28	10124196	0	109	NO	NO	NO	NO
GCF_004354085.1_ASM435408v1	Scaffold	Seongchinamella unica	100	4193411	37	109	YES	YES	YES	YES
GCF_008704535.1_ASM870453v1	Complete Genome	Streptomyces subrutilus	99.53	7604974	0	109	NO	NO	NO	NO
GCF_008710165.1_ASM871016v1	Contig	Sphingobium limneticum	97.13	5153215	7	109	YES	YES	YES	YES
GCF_014197105.1_ASM1419710v1	Scaffold	Sphingomonas jinjuensis	93.88	3855215	19	109	YES	YES	YES	YES
GCF_014202315.1_ASM1420231v1	Scaffold	Thermocatellispora tengchongensis	86.73	11651000	0	109	NO	NO	NO	NO
GCF_014649715.1_ASM1464971v1	Scaffold	Streptomyces lateritius	99.84	7707773	0	109	NO	NO	NO	NO
GCF_014701115.1_ASM1470111v1	Complete Genome	Streptomyces aurantiacus	99.91	9428393	0	109	NO	NO	NO	NO
GCF_016863135.1_ASM1686313v1	Contig	Planobispora longispora	85.23	8845392	0	109	NO	NO	NO	NO
GCF_017353515.1_ASM1735351v1	Contig	Jiella sonneratiae	91.92	5153243	0	109	YES	NO	YES	YES
GCF_017573465.1_ASM1757346v1	Contig	Actinomadura violacea	97.66	11174601	0	109	NO	NO	NO	NO
GCF_021390435.2_ASM2139043v3	Contig	Kibdelosporangium philippinense	99.25	12047807	0	109	NO	NO	NO	NO
GCF_027942015.1_ASM2794201v1	Complete Genome	Streptomyces goshikiensis	99.91	8161592	0	109	NO	NO	NO	NO
GCF_900176515.1_IMG-taxon_2595698251_annotated_assembly	Scaffold	Kibdelosporangium aridum	99.25	12276125	0	109	NO	NO	NO	NO
GCF_000497445.1_S.roseochromogenes_v1	Chromosome	Streptomyces roseochromogenus subsp. oscitans DS 12.976	98.3	9782257	0	108	NO	NO	NO	NO
GCF_001418565.1_ASM141856v1	Scaffold	Streptomyces graminilatus	97.73	9608680	0	108	NO	NO	NO	NO
GCF_001419765.1_ASM141976v1	Scaffold	Streptomyces torulosus	94.76	9848803	0	108	NO	NO	NO	NO
GCF_001513955.1_ASM151395v1	Scaffold	Streptomyces pseudovenezuelae	100	9639743	0	108	NO	NO	NO	NO
GCF_001639105.2_ASM163910v2	Chromosome	Azospirillum humicireducens	97.05	6862695	16	108	NO	NO	NO	NO
GCF_002845745.1_ASM284574v1	Scaffold	Telmatospirillum siberiense	98.77	6202994	5	108	YES	NO	YES	YES
GCF_003323735.1_ASM332373v1	Scaffold	Streptomyces reniochalinae	99.34	7687565	0	108	NO	NO	NO	NO
GCF_004349235.1_ASM434923v1	Contig	Actinomadura darangshiensis	95.13	9886063	0	108	NO	NO	NO	NO
GCF_007752535.1_ASM775253v1	Chromosome	Tautonia plasticadhaerens	98.09	9395224	0	108	NO	NO	NO	NO
GCF_008807855.1_ASM880785v1	Complete Genome	Cupriavidus oxalaticus	96.98	7296847	62	108	NO	NO	YES	NO
GCF_009498275.1_ASM949827v1	Complete Genome	Streptomyces fagopyri	99.95	8880330	0	108	NO	NO	NO	NO
GCF_014203795.1_ASM1420379v1	Contig	Streptosporangium album	86.3	9022456	0	108	NO	NO	NO	NO
GCF_014648435.1_ASM1464843v1	Scaffold	Nonomuraea spiralis	93.72	11470535	0	108	NO	NO	NO	NO
GCF_014648815.1_ASM1464881v1	Contig	Streptomyces flaveolus	99.62	7870528	0	108	NO	NO	NO	NO
GCF_014650255.1_ASM1465025v1	Scaffold	Streptomyces violarus	99.62	9119470	0	108	NO	NO	NO	NO
GCF_014656055.1_ASM1465605v1	Scaffold	Streptomyces griseosporeus	99.91	8163924	0	108	NO	NO	NO	NO
GCF_016584445.1_ASM1658444v1	Complete Genome	Rhodopseudomonas palustris	99.69	5457289	0	108	YES	NO	YES	YES
GCF_016741875.1_ASM1674187v1	Contig	Streptomyces coffeae	99.91	9896405	0	108	NO	NO	NO	NO
GCF_016862315.1_ASM1686231v1	Contig	Actinoplanes palleronii	95.85	11168746	0	108	NO	NO	NO	NO
GCF_016921115.1_ASM1692111v1	Contig	Streptomyces actuosus	99.78	8451480	0	108	NO	NO	NO	NO
GCF_019880305.1_ASM1988030v1	Complete Genome	Streptomyces decoyicus	99.94	8632952	0	108	NO	NO	NO	NO
GCF_020037025.1_ASM2003702v1	Contig	Streptomyces huiliensis	98.73	7680491	0	108	NO	NO	NO	NO
GCF_023498005.1_ASM2349800v1	Complete Genome	Streptomyces durmitorensis	100	9862620	0	108	NO	NO	NO	NO
GCF_026427415.1_ASM2642741v1	Complete Genome	Streptomyces tanashiensis	99.53	8694918	0	108	NO	NO	NO	NO
GCF_030291795.1_ASM3029179v1	Complete Genome	Streptomyces antimycoticus	99.72	9718239	0	108	NO	NO	NO	NO
GCF_907177275.1_Scock-DSM42063-v1	Scaffold	Actinacidiphila cocklensis	98.86	9139611	0	108	NO	NO	NO	NO
GCF_000349325.1_ASM34932v1	Chromosome	Streptomyces davaonensis JCM 4913	99.27	9555950	0	107	NO	NO	NO	NO
GCF_000695625.1_ASM69562v1	Contig	Amycolatopsis rifamycinica	99.06	9202418	0	107	NO	NO	NO	NO
GCF_000715845.1_ASM71584v1	Scaffold	Streptomyces monomycini	98.48	9111622	0	107	NO	NO	NO	NO
GCF_001598355.1_ASM159835v1	Contig	Sphingomonas asaccharolytica NBRC 15499	98.44	4608803	0	107	YES	NO	YES	YES
GCF_001941825.1_ASM194182v1	Complete Genome	Massilia putida	90.42	7523017	19	107	NO	NO	NO	NO
GCF_002078315.1_ASM207831v1	Complete Genome	Rickettsia bellii	98.06	1579798	0	107	YES	NO	YES	YES
GCF_002343915.1_ASM234391v1	Contig	Nannocystis exedens	98.28	12059053	0	107	NO	NO	YES	NO
GCF_002374275.1_ASM237427v1	Contig	Sphingopyxis terrae subsp. ummariensis	92.42	3570894	1	107	YES	YES	YES	YES
GCF_003346515.1_ASM334651v1	Scaffold	Streptomyces corynorhini	95.01	7735729	0	107	NO	NO	NO	NO
GCF_003391135.1_ASM339113v1	Complete Genome	Streptomyces olivoreticuli subsp. olivoreticuli	100	8809793	0	107	NO	NO	NO	NO
GCF_003994395.1_ASM399439v1	Complete Genome	Streptomyces griseoviridis	99.78	8963414	0	107	NO	NO	NO	NO
GCF_003999195.1_ASM399919v1	Contig	Actinacidiphila soli	98.58	9397553	0	107	NO	NO	NO	NO
GCF_005768555.2_ASM576855v2	Scaffold	Streptomyces sporangiiformans	99.15	10364704	0	107	NO	NO	NO	NO
GCF_007097155.1_ASM709715v1	Contig	Glacieibacterium frigidum	99.07	3428851	0	107	YES	NO	YES	YES
GCF_008868685.1_ASM886868v1	Scaffold	Streptomyces triticiradicis	99.62	9921301	0	107	NO	NO	NO	NO
GCF_009184865.1_ASM918486v1	Complete Genome	Streptomyces phaeolivaceus	99.91	10175440	0	107	NO	NO	NO	NO
GCF_009709555.1_ASM970955v1	Scaffold	Streptomyces blattellae	99.81	8494434	0	107	NO	NO	NO	NO
GCF_014195505.1_ASM1419550v1	Contig	Nonomuraea dietziae	87.9	10244150	0	107	NO	NO	NO	NO
GCF_014199915.1_ASM1419991v1	Scaffold	Prosthecomicrobium pneumaticum	94.92	4652771	5	107	YES	YES	YES	YES
GCF_014647835.1_ASM1464783v1	Scaffold	Microbispora rosea subsp. aerata	79.43	6884475	0	107	NO	NO	NO	NO
GCF_014650715.1_ASM1465071v1	Contig	Streptomyces bluensis	99.62	9022007	0	107	NO	NO	NO	NO
GCF_014712745.1_ASM1471274v1	Contig	Microbispora camponoti	83.67	8015934	0	107	NO	NO	NO	NO
GCF_015910445.1_ASM1591044v1	Complete Genome	Streptomyces bathyalis	99.51	7377472	0	107	NO	NO	NO	NO
GCF_016598475.1_ASM1659847v1	Contig	Streptomyces adelaidensis	99.57	9321252	0	107	NO	NO	NO	NO
GCF_016862115.1_ASM1686211v1	Contig	Actinoplanes deccanensis	94.72	10634869	0	107	NO	NO	NO	NO
GCF_016863215.1_ASM1686321v1	Contig	Planomonospora parontospora subsp. parontospora	83.88	7760061	0	107	NO	NO	NO	NO
GCF_022385335.1_ASM2238533v1	Complete Genome	Streptomyces deccanensis	99.24	10101518	0	107	NO	NO	NO	NO
GCF_022699385.1_ASM2269938v1	Complete Genome	Streptomyces tubbatahanensis	99.05	7760770	0	107	NO	NO	NO	NO
GCF_023516455.1_ASM2351645v1	Contig	Sphingomonas caseinilyticus	94.86	2778408	18	107	YES	YES	YES	YES
GCF_026341275.1_ASM2634127v1	Scaffold	Streptomyces ortus	98.77	9292701	0	107	NO	NO	NO	NO
GCF_029946465.1_ASM2994646v1	Contig	Polyangium sorediatum	97.96	12637164	0	107	NO	NO	NO	NO
GCF_900104815.1_IMG-taxon_2634166373_annotated_assembly	Contig	Streptomyces misionensis	100	8473721	0	107	NO	NO	NO	NO
GCF_900130065.1_IMG-taxon_2585428085_annotated_assembly	Scaffold	Sporobacter termitidis DSM 10068	98.14	4198214	13	107	NO	NO	NO	NO
GCF_000331185.2_ASM33118v2	Complete Genome	Streptomyces rimosus subsp. rimosus ATCC 10970	99.62	9643891	0	106	NO	NO	NO	NO
GCF_000935025.1_ASM93502v1	Complete Genome	Sphingomonas hengshuiensis	98.59	5228389	0	106	YES	YES	YES	YES
GCF_001189845.1_ASM118984v1	Contig	Bradyrhizobium tropiciagri	89.26	9767314	0	106	YES	NO	YES	YES
GCF_001238275.1_ASM123827v1	Contig	Bradyrhizobium viridifuturi	85.93	8811922	0	106	YES	NO	YES	YES
GCF_001418325.1_ASM141832v1	Scaffold	Streptomyces atriruber	98.46	8892875	0	106	NO	NO	NO	NO
GCF_003054555.1_ASM305455v1	Complete Genome	Streptomyces lunaelactis	99.12	8570191	0	106	NO	NO	NO	NO
GCF_003457605.1_ASM345760v1	Contig	Seongchinamella sediminis	100	4307356	5	106	YES	YES	YES	YES
GCF_003751605.1_ASM375160v1	Contig	Kitasatospora cineracea	96.88	8759731	0	106	NO	NO	NO	NO
GCF_004349055.1_ASM434905v1	Contig	Kribbella antibiotica	99.76	9279240	0	106	NO	NO	NO	NO
GCF_005864065.1_ASM586406v1	Scaffold	Microbispora fusca	80.99	8152858	0	106	NO	NO	NO	NO
GCF_005924265.1_ASM592426v1	Contig	Martelella lutilitoris	94.79	4447501	0	106	YES	NO	YES	YES
GCF_009296175.1_ASM929617v1	Contig	Microvirga tunisiensis	84.65	8834183	0	106	YES	NO	YES	YES
GCF_009753715.1_ASM975371v1	Contig	Sphingomonas horti	99.27	3350026	1	106	YES	NO	YES	YES
GCF_011683915.1_ASM1168391v1	Contig	Pelagibius litoralis	99.91	6028128	0	106	YES	NO	YES	YES
GCF_014174495.1_ASM1417449v1	Contig	Amycolatopsis echigonensis	96.71	9663932	0	106	NO	NO	NO	NO
GCF_014257025.1_ASM1425702v1	Contig	Streptomyces cupreus	99.62	9399224	0	106	NO	NO	NO	NO
GCF_014649135.1_ASM1464913v1	Scaffold	Streptomyces niveoruber	100	7843370	0	106	NO	NO	NO	NO
GCF_014852565.2_ASM1485256v2	Complete Genome	Streptomyces caniscabiei	99.62	10262635	0	106	NO	NO	NO	NO
GCF_017876405.1_ASM1787640v1	Contig	Kibdelosporangium banguiense	99.92	12808207	0	106	NO	NO	NO	NO
GCF_028657195.3_ASM2865719v3	Contig	Streptomyces iconiensis	98.77	9828295	0	106	NO	NO	NO	NO
GCF_030417495.1_ASM3041749v1	Contig	Actinomadura geliboluensis	96.61	9742800	0	106	NO	NO	NO	NO
GCF_900188405.1_IMG-taxon_2671180020_annotated_assembly	Scaffold	Actinacidiphila glaucinigra	99.62	9808662	0	106	NO	NO	NO	NO
GCF_900637495.1_51342_D02	Complete Genome	Legionella spiritensis	99.01	3407665	0	106	YES	YES	YES	YES
GCF_000168975.1_ASM16897v1	Contig	Roseibium aggregatum IAM 12614	98.7	6561391	1	105	YES	NO	YES	YES
GCF_000262345.1_Streptomyces_sulphureus_L180_version_1.0	Contig	Streptomyces xiaopingdaonensis	99.07	6466982	0	105	NO	NO	NO	NO
GCF_000428825.1_ASM42882v1	Scaffold	Desulfomicrobium escambiense DSM 10707	98.29	3782107	18	105	YES	YES	YES	YES
GCF_000716675.1_ASM71667v1	Contig	Streptomyces alboflavus	99.27	9717375	0	105	NO	NO	NO	NO
GCF_000732925.1_ASM73292v1	Complete Genome	Amycolatopsis japonica	98.31	9053857	0	105	NO	NO	NO	NO
GCF_001013905.1_sleC34	Complete Genome	Streptomyces leeuwenhoekii	100	8122491	0	105	NO	NO	NO	NO
GCF_001418575.1_ASM141857v1	Scaffold	Peterkaempfera griseoplana	95.19	8245423	0	105	NO	NO	NO	NO
GCF_001509495.1_ASM150949v1	Contig	Actinoplanes awajinensis subsp. mycoplanecinus	95.4	11392731	0	105	NO	NO	NO	NO
GCF_001598455.1_ASM159845v1	Contig	Sphingomonas pruni NBRC 15498	98.56	4482342	0	105	YES	NO	YES	YES
GCF_002573965.1_ASM257396v1	Scaffold	Azospirillum palustre	98.49	7997491	1	105	NO	NO	NO	NO
GCF_002993885.1_ASM299388v1	Chromosome	Sphingopyxis lindanitolerans	92.36	4373091	18	105	YES	YES	YES	YES
GCF_003058325.1_ASM305832v1	Chromosome	Methylobacterium currus	98.95	7745135	0	105	NO	NO	NO	NO
GCF_003344445.1_ASM334444v1	Complete Genome	Streptomyces lincolnensis	99.24	9513637	0	105	NO	NO	NO	NO
GCF_003955715.1_ASM395571v1	Complete Genome	Streptomyces aquilus	100	10393987	0	105	NO	NO	NO	NO
GCF_004681975.1_ASM468197v1	Contig	Ramlibacter humi	99.27	4468638	27	105	YES	YES	YES	YES
GCF_005144585.1_ASM514458v1	Contig	Polyangium fumosum	97.96	12981589	0	105	NO	NO	NO	NO
GCF_010093345.1_ASM1009334v1	Contig	Pseudoxanthomonas yeongjuensis	91.7	3937172	13	105	YES	YES	YES	YES
GCF_013409365.1_ASM1340936v1	Contig	Actinomadura luteofluorescens	97.32	9622362	0	105	NO	NO	NO	NO
GCF_014203595.1_ASM1420359v1	Scaffold	Streptomyces echinatus	99.86	9391279	0	105	NO	NO	NO	NO
GCF_014641715.1_ASM1464171v1	Scaffold	Polaromonas eurypsychrophila	94.97	4161929	0	105	NO	NO	NO	NO
GCF_014649375.1_ASM1464937v1	Scaffold	Streptomyces aurantiogriseus	99.53	10609595	0	105	NO	NO	NO	NO
GCF_014650355.1_ASM1465035v1	Scaffold	Streptomyces xanthochromogenes	99.62	8711471	0	105	NO	NO	NO	NO
GCF_014650695.1_ASM1465069v1	Scaffold	Streptomyces avidinii	100	8343340	0	105	NO	NO	NO	NO
GCF_014650875.1_ASM1465087v1	Scaffold	Streptomyces minutiscleroticus	100	9510939	0	105	NO	NO	NO	NO
GCF_016863615.1_ASM1686361v1	Contig	Virgisporangium aliadipatigenens	93.22	10286142	0	105	NO	NO	NO	NO
GCF_019396385.1_ASM1939638v1	Scaffold	Nonomuraea harbinensis	91.22	9393786	0	105	NO	NO	NO	NO
GCF_024648825.1_ASM2464882v1	Contig	Lentzea californiensis	99	8998498	0	105	NO	NO	NO	NO
GCF_900113515.1_IMG-taxon_2634166327_annotated_assembly	Contig	Amycolatopsis regifaucium	99	8287612	0	105	NO	NO	NO	NO
GCF_900115955.1_IMG-taxon_2634166311_annotated_assembly	Scaffold	Lentzea waywayandensis	98.76	10153412	0	105	NO	NO	NO	NO
GCF_000174095.1_wUni_1.0	Scaffold	Wolbachia endosymbiont of Muscidifurax uniraptor	78.31	867873	0	104	NO	NO	NO	NO
GCF_000497425.1_S.niveus_v1	Chromosome	Streptomyces niveus NCIMB 11891	99.34	8726876	0	104	NO	NO	NO	NO
GCF_002234405.1_ASM223440v1	Contig	Amycolatopsis thailandensis	95.23	9348263	0	104	NO	NO	NO	NO
GCF_002917105.1_ASM291710v1	Scaffold	Bosea psychrotolerans	100	6392805	0	104	YES	NO	YES	YES
GCF_004117935.1_ASM411793v1	Scaffold	Streptomyces roseicoloratus	99.95	7597003	0	104	NO	NO	NO	NO
GCF_005048155.1_ASM504815v1	Contig	Streptomyces piniterrae	99.91	8492419	0	104	NO	NO	NO	NO
GCF_005771435.1_ASM577143v1	Contig	Microbulbifer harenosus	100	4667156	9	104	YES	YES	YES	YES
GCF_006715785.1_ASM671578v1	Contig	Streptomyces puniciscabiei	99.53	9146138	0	104	NO	NO	NO	NO
GCF_007992435.1_ASM799243v1	Contig	Brevifollis gellanilyticus	99.63	7648353	0	104	NO	NO	YES	NO
GCF_008923185.1_ASM892318v1	Scaffold	Actinomadura rudentiformis	96.29	10704726	0	104	NO	NO	NO	NO
GCF_009760405.1_ASM976040v1	Contig	Nocardia terrae	98.38	9313948	0	104	NO	NO	NO	NO
GCF_013128195.2_ASM1312819v2	Complete Genome	Frigoriglobus tundricola	96.65	9857393	0	104	NO	NO	YES	NO
GCF_013409565.1_ASM1340956v1	Contig	Streptomyces fulvorobeus	99.53	6646162	0	104	NO	NO	NO	NO
GCF_013433285.1_ASM1343328v1	Scaffold	Streptomyces gossypiisoli	100	9324019	0	104	NO	NO	NO	NO
GCF_014205055.1_ASM1420505v1	Contig	Streptomyces luteogriseus	100	8709298	0	104	NO	NO	NO	NO
GCF_014323705.1_ASM1432370v1	Contig	Actinomadura alba	87.66	8382704	0	104	NO	NO	NO	NO
GCF_014649115.1_ASM1464911v1	Scaffold	Streptomyces eurythermus	99.91	9167999	0	104	NO	NO	NO	NO
GCF_014650095.1_ASM1465009v1	Scaffold	Streptomyces tanashiensis	99.53	8590508	0	104	NO	NO	NO	NO
GCF_014656295.1_ASM1465629v1	Scaffold	Streptomyces sulfonofaciens	98.77	8645219	0	104	NO	NO	NO	NO
GCF_016804005.1_ASM1680400v1	Complete Genome	Streptomyces pratensis	99.91	8281466	0	104	NO	NO	NO	NO
GCF_016863195.1_ASM1686319v1	Contig	Planobispora takensis	85.73	8970663	0	104	NO	NO	NO	NO
GCF_018777385.1_ASM1877738v1	Contig	Candidatus Symbiopectobacterium endolongispinus	93.6	4492448	4	104	NO	NO	YES	NO
GCF_019599145.1_ASM1959914v1	Complete Genome	Streptomyces akebiae	99.43	10549378	0	104	NO	NO	NO	NO
GCF_020405475.1_wolbachia_tribolium_confusum_ST-30	Contig	Wolbachia endosymbiont of Tribolium confusum	90.94	1418452	0	104	NO	NO	NO	NO
GCF_026343955.1_ASM2634395v1	Contig	Kaistia defluvii	88.26	4901180	0	104	NO	NO	YES	NO
GCF_900102525.1_IMG-taxon_2675903146_annotated_assembly	Contig	Bosea robiniae	99.39	5279103	0	104	NO	NO	NO	NO
GCF_900105695.1_IMG-taxon_2634166371_annotated_assembly	Contig	Streptomyces melanosporofaciens	98.64	10769732	0	104	NO	NO	NO	NO
GCF_000237305.1_ASM23730v1	Complete Genome	Streptantibioticus cattleyicolor NRRL 8057 = DSM 46488	97.47	8092553	0	103	NO	NO	NO	NO
GCF_000974445.1_ASM97444v1	Scaffold	Lentzea aerocolonigenes	98.51	10698154	0	103	NO	NO	NO	NO
GCF_001027565.1_ASM102756v1	Contig	Wolbachia endosymbiont of Armadillidium vulgare str. wVulC	97.21	1663741	0	103	NO	NO	NO	NO
GCF_001514065.1_ASM151406v1	Scaffold	Streptomyces antibioticus	100	10145887	0	103	NO	NO	NO	NO
GCF_001866665.1_ASM186666v1	Contig	Streptomyces monashensis	99.91	10254857	0	103	NO	NO	NO	NO
GCF_001953865.1_ASM195386v1	Scaffold	Amycolatopsis coloradensis	98.66	9049490	0	103	NO	NO	NO	NO
GCF_002148795.1_ASM214879v1	Contig	Oceanibaculum nanhaiense	99.56	3843501	0	103	NO	NO	NO	NO
GCF_003046185.1_ASM304618v1	Contig	Phreatobacter oligotrophus	100	4880542	0	103	YES	NO	YES	YES
GCF_003112535.1_ASM311253v1	Scaffold	Streptomyces rishiriensis	99.62	9179716	0	103	NO	NO	NO	NO
GCF_003633685.1_ASM363368v1	Contig	Micromonospora pisi	93.59	8739867	0	103	NO	NO	NO	NO
GCF_003967355.1_ASM396735v1	Scaffold	Embleya hyalina	95.31	12054215	0	103	NO	NO	NO	NO
GCF_004348345.1_ASM434834v1	Contig	Nonomuraea longispora	88.58	9164341	0	103	NO	NO	NO	NO
GCF_005280215.1_ASM528021v1	Scaffold	Streptomyces lasalocidi	99.62	8503469	0	103	NO	NO	NO	NO
GCF_007483665.1_ASM748366v1	Scaffold	Catellatospora sichuanensis	95.51	9454573	0	103	NO	NO	NO	NO
GCF_008364955.1_ASM836495v1	Scaffold	Azospirillum lipoferum	97.67	7987183	5	103	NO	NO	NO	NO
GCF_008806595.1_ASM880659v1	Scaffold	Streptomyces luteolifulvus	99.53	9033607	0	103	NO	NO	NO	NO
GCF_009755605.1_ASM975560v1	Scaffold	Streptomyces typhae	83.19	9812178	0	103	NO	NO	NO	NO
GCF_013409935.1_ASM1340993v1	Contig	Streptosporangium sandarakinum	83.7	7647619	0	103	NO	NO	NO	NO
GCF_014648835.1_ASM1464883v1	Scaffold	Streptomyces netropsis	99.15	7728815	0	103	NO	NO	NO	NO
GCF_014650115.1_ASM1465011v1	Scaffold	Streptomyces olivaceoviridis	99.53	9763431	0	103	NO	NO	NO	NO
GCF_014650155.1_ASM1465015v1	Scaffold	Streptomyces purpurascens	100	9428626	0	103	NO	NO	NO	NO
GCF_014650895.1_ASM1465089v1	Scaffold	Streptomyces omiyaensis	99.91	8566167	0	103	NO	NO	NO	NO
GCF_015767775.1_ASM1576777v1	Complete Genome	Streptomyces clavuligerus	99.62	7588082	0	103	NO	NO	NO	NO
GCF_016613475.2_ASM1661347v2	Complete Genome	Lysobacter arenosi	84.95	3947892	8	103	NO	NO	YES	NO
GCF_016863175.1_ASM1686317v1	Contig	Planobispora siamensis	86.78	9274863	0	103	NO	NO	NO	NO
GCF_017352135.1_ASM1735213v1	Complete Genome	Rhizobium lentis	98.83	6423001	0	103	YES	NO	YES	YES
GCF_018829635.1_ASM1882963v1	Contig	Actinoplanes bogorensis	93.57	10192286	0	103	NO	NO	NO	NO
GCF_019710575.1_ASM1971057v1	Contig	Actinoplanes polyasparticus	93.63	10686494	0	103	NO	NO	NO	NO
GCF_020400605.1_ASM2040060v1	Contig	Streptomyces aculeolatus	98.93	8986452	0	103	NO	NO	NO	NO
GCF_023544465.1_ASM2354446v1	Contig	Actinoplanes maris	93.53	9353428	0	103	NO	NO	NO	NO
GCF_028421465.1_ASM2842146v1	Complete Genome	Streptomyces xanthophaeus	99.87	8595635	0	103	NO	NO	NO	NO
GCF_028550555.1_ASM2855055v1	Contig	Rhodoplanes tepidamans	94.38	6800548	0	103	YES	NO	YES	YES
GCF_900104725.1_IMG-taxon_2634166338_annotated_assembly	Chromosome	Actinoplanes derwentensis	92.45	10654181	0	103	NO	NO	NO	NO
GCF_900107965.1_IMG-taxon_2667527441_annotated_assembly	Scaffold	Actinacidiphila yanglinensis	99.87	9592053	0	103	NO	NO	NO	NO
GCF_900109465.1_IMG-taxon_2675903135_annotated_assembly	Scaffold	Streptacidiphilus jiangxiensis	97.54	9538627	0	103	NO	NO	NO	NO
GCF_900110575.1_IMG-taxon_2634166333_annotated_assembly	Scaffold	Amycolatopsis saalfeldensis	98.95	9861953	0	103	NO	NO	NO	NO
GCF_900114935.1_IMG-taxon_2651870105_annotated_assembly	Scaffold	Pleomorphomonas diazotrophica	90.43	4521864	0	103	YES	NO	YES	YES
GCF_000444875.1_ASM44487v1	Complete Genome	Streptomyces collinus Tu 365	99.65	8377286	0	102	NO	NO	NO	NO
GCF_000472965.1_ASM47296v1	Scaffold	Bradyrhizobium murdochi	99.7	7952346	0	102	YES	NO	YES	YES
GCF_001445655.1_ASM144565v1	Scaffold	Streptomyces roseifaciens	98.77	8639831	0	102	NO	NO	NO	NO
GCF_001552635.1_ASM155263v1	Contig	Actinomadura hibisca NBRC 15177	98.39	9023974	0	102	NO	NO	NO	NO
GCF_005144435.2_ASM514443v2	Complete Genome	Agrobacterium leguminum	99.78	6276641	0	102	YES	YES	YES	YES
GCF_007713735.2_ASM771373v2	Contig	Amycolatopsis acidicola	98.71	9465182	0	102	NO	NO	NO	NO
GCF_008634015.1_ASM863401v1	Contig	Streptomyces filamentosus	99.62	7875407	0	102	NO	NO	NO	NO
GCF_013364315.1_ASM1336431v1	Complete Genome	Streptomyces microflavus	99.91	8452583	0	102	NO	NO	NO	NO
GCF_013870525.1_ASM1387052v1	Contig	Amycolatopsis pittospori	96.66	8424322	0	102	NO	NO	NO	NO
GCF_014145675.1_ASM1414567v1	Contig	Amycolatopsis dendrobii	99.06	9690793	0	102	NO	NO	NO	NO
GCF_014203355.1_ASM1420335v1	Contig	Kutzneria kofuensis	99.5	10435448	0	102	NO	NO	NO	NO
GCF_014646095.1_ASM1464609v1	Scaffold	Streptomyces lacrimifluminis	99.65	9022781	0	102	NO	NO	NO	NO
GCF_014649775.1_ASM1464977v1	Scaffold	Streptomyces longisporoflavus	99.91	9802249	0	102	NO	NO	NO	NO
GCF_014649995.1_ASM1464999v1	Scaffold	Streptomyces griseoflavus	100	7580440	0	102	NO	NO	NO	NO
GCF_016741775.1_ASM1674177v1	Contig	Streptomyces actinomycinicus	100	8790999	0	102	NO	NO	NO	NO
GCF_016805305.1_ASM1680530v1	Contig	Roseomonas ponticola	77.34	6732422	0	102	NO	NO	NO	NO
GCF_017313405.1_ASM1731340v1	Contig	Agrobacterium burrii	97.11	6081496	0	102	YES	YES	YES	YES
GCF_021233355.1_ASM2123335v1	Chromosome	Luteimonas fraxinea	86.78	4008283	24	102	YES	NO	YES	YES
GCF_024539675.1_ASM2453967v1	Scaffold	Streptomyces hilarionis	99.81	9061055	0	102	NO	NO	NO	NO
GCF_900659635.1_LMG30035_FinalContigs.fasta.gz	Contig	Actinomadura roseirufa	93.66	9034239	0	102	NO	NO	NO	NO
GCF_947179575.1_ilEreLige1.Wolbachia_sp_1.1	Contig	Wolbachia endosymbiont (group B) of Erebia ligea	97.91	1520330	0	102	NO	NO	NO	NO
GCF_000725565.1_Doro.v1.0	Scaffold	Streptomyces peucetius	99.53	9528656	0	101	NO	NO	NO	NO
GCF_001294335.1_ASM129433v1	Contig	Streptomyces chattanoogensis	99.38	9129105	0	101	NO	NO	NO	NO
GCF_001418005.1_ASM141800v1	Scaffold	Chelatococcus sambhunathii	99.18	4373820	0	101	YES	NO	YES	YES
GCF_001748305.1_ASM174830v1	Scaffold	Streptomyces luteocolor	99.43	9298666	0	101	NO	NO	NO	NO
GCF_002082195.1_ASM208219v1	Complete Genome	Streptomyces gilvosporeus	99.47	8482298	0	101	NO	NO	NO	NO
GCF_002846615.1_ASM284661v1	Contig	Amycolatopsis echigonensis	98.54	9312963	0	101	NO	NO	NO	NO
GCF_003258865.1_ASM325886v1	Scaffold	Rhodoplanes roseus	98.38	6879536	0	101	YES	NO	YES	YES
GCF_003265345.1_ASM326534v1	Scaffold	Lentzea terrae	99.5	10581732	0	101	NO	NO	NO	NO
GCF_003385055.1_ASM338505v1	Contig	Rhodococcus wratislaviensis	99.42	7835688	0	101	NO	NO	NO	NO
GCF_004208535.1_ASM420853v1	Scaffold	Sphingomonas populi	97.91	5204106	0	101	YES	NO	YES	YES
GCF_013087515.1_ASM1308751v1	Scaffold	Rhizobium sophorae	99.65	7500905	0	101	YES	NO	YES	NO
GCF_013839525.1_ASM1383952v1	Contig	Chthonobacter rhizosphaerae	95.55	4987857	0	101	YES	NO	YES	YES
GCF_014649415.1_ASM1464941v1	Scaffold	Streptomyces badius	99.44	7515187	0	101	NO	NO	NO	NO
GCF_014649935.1_ASM1464993v1	Scaffold	Streptomyces variabilis	99.81	7359771	0	101	NO	NO	NO	NO
GCF_015160855.1_ASM1516085v1	Complete Genome	Streptomyces ferrugineus	99.81	9959088	0	101	NO	NO	NO	NO
GCF_016025255.1_ASM1602525v1	Chromosome	Sphingosinicella flava	98.33	2421697	10	101	YES	NO	YES	YES
GCF_016807805.1_ASM1680780v1	Complete Genome	Xanthobacter dioxanivorans	86	6650762	0	101	YES	NO	YES	YES
GCF_016862435.1_ASM1686243v1	Contig	Actinoplanes tereljensis	94.23	10792567	0	101	NO	NO	NO	NO
GCF_016918855.1_ASM1691885v1	Contig	Actinacidiphila acididurans	98.77	9687523	0	101	NO	NO	NO	NO
GCF_017357245.1_ASM1735724v1	Complete Genome	Rhizobium bangladeshense	99.86	6348611	0	101	YES	NO	YES	YES
GCF_017573545.1_ASM1757354v1	Contig	Actinomadura nitritigenes	97.62	10586883	0	101	NO	NO	NO	NO
GCF_018682675.1_ASM1868267v1	Contig	Sphingopyxis soli	92.68	3633474	3	101	YES	YES	YES	YES
GCF_024756225.1_ASM2475622v1	Contig	Telluria mixta	97.44	7395230	31	101	YES	YES	YES	YES
GCF_026339895.1_ASM2633989v1	Contig	Streptomyces viridodiastaticus	99.95	7829824	0	101	NO	NO	NO	NO
GCF_027947535.2_ASM2794753v2	Contig	Streptantibioticus silvisoli	97.59	8699263	0	101	NO	NO	NO	NO
GCF_900115345.1_IMG-taxon_2675903692_annotated_assembly	Contig	Amycolatopsis rubida	98.9	9873592	0	101	NO	NO	NO	NO
GCF_000342005.1_Whole_genome_assembly	Contig	Amycolatopsis decaplanina DSM 44594	98.5	8533276	0	100	NO	NO	NO	NO
GCF_000718135.1_ASM71813v1	Contig	Streptomyces cyaneofuscatus	99.47	7899007	0	100	NO	NO	NO	NO
GCF_001419795.1_ASM141979v1	Scaffold	Streptomyces niveiscabiei	92.68	9549495	0	100	NO	NO	NO	NO
GCF_001570365.1_ASM157036v1	Scaffold	Microtetraspora fusca	83.61	9024887	0	100	NO	NO	NO	NO
GCF_001570605.1_ASM157060v1	Scaffold	Herbidospora cretacea	83	8282092	0	100	NO	NO	NO	NO
GCF_001927285.1_ASM192728v1	Contig	Mongoliimonas terrestris	99.82	5098595	0	100	YES	NO	YES	YES
GCF_001995215.1_ASM199521v1	Scaffold	Amycolatopsis azurea DSM 43854	99	9217912	0	100	NO	NO	NO	NO
GCF_004138495.1_ASM413849v1	Scaffold	Phytoactinopolyspora endophytica	93.81	7609351	0	100	NO	NO	NO	NO
GCF_004522235.1_ASM452223v1	Scaffold	Amycolatopsis nivea	99.06	9571567	0	100	NO	NO	NO	NO
GCF_004803895.1_ASM480389v1	Complete Genome	Streptomyces hawaiiensis	99.09	8876928	0	100	NO	NO	NO	NO
GCF_008386495.1_ASM838649v1	Scaffold	Streptomyces tailanensis	99.81	10008136	0	100	NO	NO	NO	NO
GCF_008704795.1_ASM870479v1	Complete Genome	Streptomyces spectabilis	99.15	9807160	0	100	NO	NO	NO	NO
GCF_009604385.1_ASM960438v1	Contig	Streptomyces smaragdinus	99.53	7857212	0	100	NO	NO	NO	NO
GCF_009649845.1_ASM964984v1	Scaffold	Polyangium spumosum	97.62	10760459	0	100	NO	NO	NO	NO
GCF_009796285.1_ASM979628v1	Complete Genome	Streptomyces broussonetiae	99.81	9735779	0	100	NO	NO	NO	NO
GCF_009811635.1_ASM981163v1	Contig	Streptomyces tubercidicus	99.57	7928609	0	100	NO	NO	NO	NO
GCF_013423485.1_ASM1342348v1	Contig	Azospirillum oleiclasticum	92.63	7796483	4	100	NO	NO	NO	NO
GCF_014141535.1_ASM1414153v1	Contig	Streptomyces alkaliphilus	95.44	5761373	0	100	NO	NO	NO	NO
GCF_014203955.1_ASM1420395v1	Contig	Sphingobium lignivorans	94.34	4207152	21	100	YES	YES	YES	YES
GCF_014495845.1_ASM1449584v1	Complete Genome	Aquibium microcysteis	98.8	6109263	0	100	YES	YES	YES	YES
GCF_014530645.1_ASM1453064v1	Scaffold	Bradyrhizobium campsiandrae	98.97	8871850	0	100	YES	NO	YES	YES
GCF_014645855.1_ASM1464585v1	Scaffold	Microbispora bryophytorum	82.72	7827503	0	100	NO	NO	NO	NO
GCF_014649635.1_ASM1464963v1	Scaffold	Streptomyces griseomycini	99.84	8662724	0	100	NO	NO	NO	NO
GCF_014649735.1_ASM1464973v1	Scaffold	Streptomyces lavendofoliae	98.86	7170078	0	100	NO	NO	NO	NO
GCF_014650215.1_ASM1465021v1	Scaffold	Streptomyces vinaceusdrappus	100	8461620	0	100	NO	NO	NO	NO
GCF_014650955.1_ASM1465095v1	Scaffold	Streptomyces tauricus	99.75	9713444	0	100	NO	NO	NO	NO
GCF_015751785.1_ASM1575178v1	Contig	Micromonospora vinacea	98.64	7340502	0	100	NO	NO	NO	NO
GCF_018069625.1_ASM1806962v1	Complete Genome	Streptomyces yatensis	99.72	10360357	0	100	NO	NO	NO	NO
GCF_021227995.1_ASM2122799v1	Complete Genome	Novosphingobium kaempferiae	96.87	5698134	0	100	YES	NO	YES	YES
GCF_024628825.1_ASM2462882v1	Complete Genome	Amycolatopsis roodepoortensis	99	9489959	0	100	NO	NO	NO	NO
GCF_025685565.1_ASM2568556v1	Contig	Granulicella aggregans	88.18	5740939	0	100	YES	NO	YES	YES
GCF_025996515.1_ASM2599651v1	Scaffold	Rhizohabitans arisaemae	74.28	8328102	0	100	NO	NO	NO	NO
GCF_900188445.1_IMG-taxon_2700988714_annotated_assembly	Scaffold	Actinomadura meyerae	96.38	8572960	0	100	NO	NO	NO	NO
GCF_000719285.1_ASM71928v1	Contig	Streptomyces bicolor	100	9481884	0	99	NO	NO	NO	NO
GCF_000744225.1_ASM74422v1	Contig	Kitasatospora mediocidica KCTC 9733	97.98	8681761	0	99	NO	NO	NO	NO
GCF_001270025.1_Sazu_1.0	Scaffold	Streptomyces azureus	99.91	8790205	0	99	NO	NO	NO	NO
GCF_001570545.1_ASM157054v1	Scaffold	Herbidospora mongoliensis	83.27	9071752	0	99	NO	NO	NO	NO
GCF_001953875.1_ASM195387v1	Scaffold	Streptomyces amritsarensis	100	7816792	0	99	NO	NO	NO	NO
GCF_003751945.1_ASM375194v1	Contig	Couchioplanes caeruleus	97.27	8428293	0	99	NO	NO	NO	NO
GCF_004331465.1_ASM433146v1	Contig	Kribbella pittospori	98.32	9491812	0	99	NO	NO	NO	NO
GCF_007829815.1_ASM782981v1	Contig	Kitasatospora viridis	98.36	10089953	0	99	NO	NO	NO	NO
GCF_008254045.1_ASM825404v1	Complete Genome	Limnoglobus roseus	96.91	9378099	0	99	NO	NO	NO	NO
GCF_011694815.1_ASM1169481v1	Complete Genome	Streptomyces liangshanensis	99.62	7716784	0	99	NO	NO	NO	NO
GCF_011764565.1_ASM1176456v1	Complete Genome	Phytohabitans suffuscus	81.29	10148719	0	99	NO	NO	NO	NO
GCF_014650135.1_ASM1465013v1	Scaffold	Streptomyces plicatus	100	8368647	0	99	NO	NO	NO	NO
GCF_014656095.1_ASM1465609v1	Scaffold	Streptomyces longispororuber	99.81	9078602	0	99	NO	NO	NO	NO
GCF_016863395.1_ASM1686339v1	Contig	Sphaerisporangium rufum	81.13	7803316	0	99	NO	NO	NO	NO
GCF_018141485.1_ASM1814148v1	Complete Genome	Streptomyces alfalfae	99.09	8278595	0	99	NO	NO	NO	NO
GCF_019890615.1_ASM1989061v1	Contig	Streptantibioticus parmotrematis	97.6	7401816	0	99	NO	NO	NO	NO
GCF_021165935.1_ASM2116593v1	Complete Genome	Microbulbifer elongatus	99.44	4196952	3	99	NO	NO	YES	NO
GCF_023516505.1_ASM2351650v1	Contig	Sphingomonas brevis	96.18	2593639	16	99	YES	NO	YES	YES
GCF_024519335.1_ASM2451933v1	Contig	Streptomyces telluris	96.59	8368964	0	99	NO	NO	NO	NO
GCF_024662015.1_ASM2466201v1	Complete Genome	Nisaea acidiphila	93.67	4746001	1	99	YES	YES	YES	YES
GCF_025165795.1_ASM2516579v1	Scaffold	Streptomyces gossypii	99.47	7518892	0	99	NO	NO	NO	NO
GCF_026343715.1_ASM2634371v1	Contig	Streptomyces bobili	100	8772729	0	99	NO	NO	NO	NO
GCF_900107925.1_IMG-taxon_2675903153_annotated_assembly	Contig	Amycolatopsis pretoriensis	98.73	10299026	0	99	NO	NO	NO	NO
GCF_000009765.2_ASM976v2	Complete Genome	Streptomyces avermitilis MA-4680 = NBRC 14893	99.91	9119895	0	98	NO	NO	NO	NO
GCF_000372465.1_ASM37246v1	Contig	Kribbella catacumbae DSM 19601	98.01	9627810	0	98	NO	NO	NO	NO
GCF_000720455.1_ASM72045v1	Contig	Streptomyces virginiae	100	8318538	0	98	NO	NO	NO	NO
GCF_000825685.1_Rickettsia_hoogstraalii_Croatica	Contig	Rickettsia hoogstraalii	99.23	1484812	21	98	YES	NO	YES	NO
GCF_001302585.1_ASM130258v1	Complete Genome	Kibdelosporangium phytohabitans	99.5	11759770	0	98	NO	NO	NO	NO
GCF_003012815.1_ASM301281v1	Contig	Allosphingosinicella vermicomposti	96.79	2507679	1	98	YES	YES	YES	YES
GCF_004348335.1_ASM434833v1	Contig	Actinomadura bangladeshensis	95.59	8697534	0	98	NO	NO	NO	NO
GCF_005889715.1_ASM588971v1	Contig	Actinomadura soli	93.75	9041065	0	98	NO	NO	NO	NO
GCF_008085905.1_ASM808590v1	Contig	Actinomadura syzygii	95.71	9698644	0	98	NO	NO	NO	NO
GCF_008369065.1_ASM836906v1	Scaffold	Streptomyces apricus	96.91	8852793	0	98	NO	NO	NO	NO
GCF_009811555.1_ASM981155v1	Contig	Streptomyces caniferus	100	9147309	0	98	NO	NO	NO	NO
GCF_013211575.1_ASM1321157v1	Chromosome	Actinomadura verrucosospora	97.33	10214634	0	98	NO	NO	NO	NO
GCF_013280595.1_4NS15_2019_02_14	Scaffold	Kibdelosporangium persicum	99.5	10350595	0	98	NO	NO	NO	NO
GCF_014649855.1_ASM1464985v1	Scaffold	Streptomyces roseolus	99.43	8057871	0	98	NO	NO	NO	NO
GCF_014650035.1_ASM1465003v1	Scaffold	Streptomyces lucensis JCM 4490	99.81	7745149	0	98	NO	NO	NO	NO
GCF_014651175.1_ASM1465117v1	Scaffold	Streptomyces clavifer	99.91	7889012	0	98	NO	NO	NO	NO
GCF_014654365.1_ASM1465436v1	Scaffold	Amycolatopsis oliviviridis	99	9448616	0	98	NO	NO	NO	NO
GCF_014655295.1_ASM1465529v1	Scaffold	Streptomyces fumanus	99.62	8153910	0	98	NO	NO	NO	NO
GCF_014874095.1_ASM1487409v1	Contig	Plantactinospora soyae	96.42	9715930	0	98	NO	NO	NO	NO
GCF_016467295.1_ASM1646729v1	Complete Genome	Streptomyces murinus	99.91	8539264	0	98	NO	NO	NO	NO
GCF_016860545.1_ASM1686054v1	Contig	Streptomyces asoensis	100	8834141	0	98	NO	NO	NO	NO
GCF_020099395.1_ASM2009939v1	Complete Genome	Streptomyces mobaraensis	98.79	7668063	0	98	NO	NO	NO	NO
GCF_020819595.1_ASM2081959v1	Contig	Streptomyces barringtoniae	99.62	9045328	0	98	NO	NO	NO	NO
GCF_025961225.1_ASM2596122v1	Contig	Azospirillum canadense	95.76	9732847	3	98	NO	NO	NO	NO
GCF_026343995.1_ASM2634399v1	Contig	Kaistia dalseonensis	81.61	5184115	0	98	YES	NO	YES	YES
GCF_027922325.1_ASM2792232v1	Contig	Methylopila turkensis	90.37	3868435	0	98	YES	YES	YES	YES
GCF_900215205.1_IMG-taxon_2675903134_annotated_assembly	Scaffold	Actinoplanes atraurantiacus	95.17	10906727	0	98	NO	NO	NO	NO
GCF_000255705.1_ASM25570v1	Scaffold	Zavarzinella formosa DSM 19928	97.72	10086423	0	97	NO	NO	YES	NO
GCF_000308875.1_ASM30887v1	Contig	Nocardia transvalensis NBRC 15921	98.17	8383303	0	97	YES	NO	YES	YES
GCF_000374165.1_ASM37416v1	Scaffold	Parafrankia elaeagni	99.55	7589313	0	97	NO	NO	NO	NO
GCF_000384175.1_ASM38417v1	Scaffold	Streptomyces purpureus KA281	100	7458334	0	97	NO	NO	NO	NO
GCF_000725125.1_ASM72512v1	Contig	Streptomyces toyocaensis	99.91	7341014	0	97	NO	NO	NO	NO
GCF_000966975.1_ASM96697v1	Contig	Streptomyces katrae	92.7	8049424	0	97	NO	NO	NO	NO
GCF_000968685.2_ASM96868v2	Contig	Streptomyces antioxidans	99.91	9118065	0	97	NO	NO	NO	NO
GCF_001514215.1_ASM151421v1	Scaffold	Streptomyces bungoensis	99.53	8408982	0	97	NO	NO	NO	NO
GCF_001598415.1_ASM159841v1	Contig	Sphingomonas mali NBRC 15500	98.88	5228377	0	97	YES	NO	YES	YES
GCF_002093975.1_ASM209397v1	Scaffold	Thermoactinospora rubra	87.97	8220793	0	97	NO	NO	NO	NO
GCF_003330865.1_ASM333086v1	Complete Genome	Streptomyces atratus	100	9641288	0	97	NO	NO	NO	NO
GCF_003351345.1_ASM335134v1	Contig	Bosea caraganae	100	6173500	0	97	YES	NO	YES	YES
GCF_003363265.1_ASM336326v1	Scaffold	Dyella psychrodurans	99.4	4538842	1	97	YES	YES	YES	YES
GCF_003595235.1_ASM359523v1	Complete Genome	Streptomyces griseorubiginosus	100	9512378	0	97	NO	NO	NO	NO
GCF_003977685.1_ASM397768v1	Scaffold	Tautonia sociabilis	98.66	6760005	0	97	NO	NO	NO	NO
GCF_008704205.1_ASM870420v1	Contig	Nocardia colli	98.53	10032764	0	97	NO	NO	NO	NO
GCF_008704575.1_ASM870457v1	Complete Genome	Streptomyces galilaeus	100	7756194	0	97	NO	NO	NO	NO
GCF_008705135.1_ASM870513v1	Complete Genome	Streptomyces coeruleorubidus	100	9335698	0	97	NO	NO	NO	NO
GCF_011064595.1_ASM1106459v1	Contig	Paludisphaera soli	97.72	7973901	0	97	NO	NO	NO	NO
GCF_014189415.1_ASM1418941v1	Complete Genome	Tardiphaga robiniae	97.02	6571273	0	97	YES	NO	YES	YES
GCF_014489615.1_ASM1448961v1	Complete Genome	Streptomyces genisteinicus	99.81	8188347	0	97	NO	NO	NO	NO
GCF_014646255.1_ASM1464625v1	Scaffold	Lentzea pudingi	99.5	9209394	0	97	NO	NO	NO	NO
GCF_014874055.1_ASM1487405v1	Contig	Actinophytocola algeriensis	99.56	9750021	0	97	NO	NO	NO	NO
GCF_016919245.1_ASM1691924v1	Scaffold	Streptomyces zhihengii	99.43	9733137	0	97	NO	NO	NO	NO
GCF_017313085.1_ASM1731308v1	Scaffold	Roseibium limicola	99.59	4510535	0	97	YES	NO	YES	YES
GCF_017315755.1_ASM1731575v1	Scaffold	Streptomyces beijiangensis	99.05	8403055	0	97	NO	NO	NO	NO
GCF_018332695.1_ASM1833269v1	Contig	Actinoplanes toevensis	94.76	10945774	0	97	NO	NO	NO	NO
GCF_021462825.1_ASM2146282v1	Contig	Streptomyces glomeratus	100	7805372	0	97	NO	NO	NO	NO
GCF_900188105.1_IMG-taxon_2724679706_annotated_assembly	Contig	Actinomadura mexicana	96.88	8786361	0	97	NO	NO	NO	NO
GCF_900199185.1_IMG-taxon_2718218511_annotated_assembly	Contig	Sphingomonas guangdongensis	99.16	3544824	0	97	YES	NO	YES	YES
GCF_900230255.1_IMG-taxon_2667528161_annotated_assembly	Scaffold	Caenispirillum bisanense	99.56	5275453	0	97	NO	NO	NO	NO
GCF_902498735.1_strain_DBB_genome	Scaffold	Desulfoluna spongiiphila	98.68	6682390	0	97	NO	NO	YES	NO
GCF_000010605.1_ASM1060v1	Complete Genome	Streptomyces griseus subsp. griseus NBRC 13350	99.91	8545929	0	96	NO	NO	NO	NO
GCF_000242455.2_ASM24245v3	Complete Genome	Singulisphaera acidiphila DSM 18658	98.11	9755686	0	96	NO	NO	NO	NO
GCF_000280865.2_ASM28086v2	Complete Genome	Streptomyces auratus AGR0001	99.91	7901452	0	96	NO	NO	NO	NO
GCF_000725555.1_Doro.v1.0	Scaffold	Streptomyces erythrochromogenes	100	7507524	0	96	NO	NO	NO	NO
GCF_001187435.1_ASM118743v1	Contig	Streptomyces caatingaensis	99.21	7055077	0	96	NO	NO	NO	NO
GCF_001293685.1_ASM129368v1	Contig	Desulfatitalea tepidiphila	97.33	5614477	0	96	NO	NO	YES	NO
GCF_001418475.1_ASM141847v1	Scaffold	Streptomyces ossamyceticus	94.95	9298634	0	96	NO	NO	NO	NO
GCF_001514205.1_ASM151420v1	Scaffold	Streptomyces griseoruber	99.91	10217879	0	96	NO	NO	NO	NO
GCF_001552195.1_ASM155219v1	Contig	Actinomadura latina NBRC 106108	94.11	7867648	0	96	NO	NO	NO	NO
GCF_001570525.1_ASM157052v1	Scaffold	Herbidospora sakaeratensis	82.57	8595700	0	96	NO	NO	NO	NO
GCF_001746455.1_ASM174645v1	Contig	Streptomyces agglomeratus	99.38	8962368	0	96	NO	NO	NO	NO
GCF_002982075.1_ASM298207v1	Contig	Labrys okinawensis	98.42	6508340	0	96	YES	NO	NO	NO
GCF_003074055.1_ASM307405v1	Complete Genome	Streptomyces nigra	99.53	7641029	0	96	NO	NO	NO	NO
GCF_003148865.1_ASM314886v1	Scaffold	Lentzea atacamensis	99.25	9529573	0	96	NO	NO	NO	NO
GCF_003344965.1_ASM334496v1	Complete Genome	Streptomyces paludis	100	8454852	0	96	NO	NO	NO	NO
GCF_003594875.1_ASM359487v1	Scaffold	Bailinhaonella thermotolerans	81.14	8989662	0	96	NO	NO	NO	NO
GCF_003814885.1_ASM381488v1	Contig	Kitasatospora cineracea	98.11	8578249	0	96	NO	NO	NO	NO
GCF_003857055.1_ASM385705v1	Contig	Micromonospora inaquosa	97.39	7748575	0	96	NO	NO	NO	NO
GCF_005144635.2_ASM514463v2	Complete Genome	Polyangium aurulentum	97.96	12320079	0	96	NO	NO	NO	NO
GCF_005239095.1_ASM523909v1	Scaffold	Luteimonas gilva	82.6	3632536	25	96	YES	NO	YES	YES
GCF_007990755.1_ASM799075v1	Contig	Nocardia ninae NBRC 108245	98.1	9698742	0	96	NO	NO	NO	NO
GCF_008312835.1_ASM831283v1	Contig	Streptomyces marokkonensis	100	7890048	0	96	NO	NO	NO	NO
GCF_013363995.1_ASM1336399v1	Scaffold	Nonomuraea rhodomycinica	88.29	9611123	0	96	NO	NO	NO	NO
GCF_013409045.1_ASM1340904v1	Contig	Actinomadura citrea	96.82	8992310	0	96	NO	NO	NO	NO
GCF_013423955.1_ASM1342395v1	Contig	Ottowia beijingensis	62.27	4286847	0	96	NO	NO	NO	NO
GCF_014201115.1_ASM1420111v1	Contig	Nocardiopsis metallicus	97.81	7776555	0	96	NO	NO	NO	NO
GCF_014636175.1_ASM1463617v1	Contig	Sphingomonas psychrolutea	97.45	3749451	0	96	YES	YES	YES	YES
GCF_015751755.1_ASM1575175v1	Contig	Actinomadura viridis	96.72	8992097	0	96	NO	NO	NO	NO
GCF_016862295.1_ASM1686229v1	Contig	Actinoplanes octamycinicus	96.93	10138477	0	96	NO	NO	NO	NO
GCF_016863655.1_ASM1686365v1	Contig	Virgisporangium ochraceum	93.62	11432222	0	96	NO	NO	NO	NO
GCF_016917755.1_ASM1691775v1	Complete Genome	Streptomyces noursei	99.72	9857535	0	96	NO	NO	NO	NO
GCF_017676345.1_ASM1767634v1	Contig	Streptomyces smyrnaeus	98.39	8077585	0	96	NO	NO	NO	NO
GCF_019429525.1_ASM1942952v1	Contig	Sphingomonas folli	99.52	4390202	6	96	YES	YES	YES	YES
GCF_024055795.1_ASM2405579v1	Contig	Actinoallomurus purpureus	94.36	9249720	0	96	NO	NO	NO	NO
GCF_028401405.1_ASM2840140v1	Contig	Streptomyces heilongjiangensis	98.48	8936924	0	96	NO	NO	NO	NO
GCF_030144325.1_ASM3014432v1	Complete Genome	Bosea vestrisii	95.48	6306553	0	96	YES	NO	YES	YES
GCF_900103455.1_IMG-taxon_2675903062_annotated_assembly	Scaffold	Streptomyces wuyuanensis	99.62	8039558	0	96	NO	NO	NO	NO
GCF_900108175.1_IMG-taxon_2634166348_annotated_assembly	Scaffold	Thermomonospora echinospora	98.7	8649739	0	96	NO	NO	NO	NO
GCF_900445005.1_58901_F01	Contig	Actinomadura madurae	92.79	10191271	0	96	NO	NO	NO	NO
GCF_000423225.1_ASM42322v1	Scaffold	Kaistia adipata DSM 17808	98.14	4839203	1	95	YES	YES	YES	YES
GCF_000429025.1_ASM42902v1	Scaffold	Pseudonocardia spinosispora DSM 44797	98.62	9537556	0	95	NO	NO	NO	NO
GCF_000717245.1_ASM71724v1	Contig	Kitasatospora papulosa	99.91	7568795	0	95	NO	NO	NO	NO
GCF_001590985.1_ASM159098v1	Contig	Novosphingobium naphthalenivorans NBRC 102051	96.6	5236092	6	95	YES	NO	YES	YES
GCF_002794255.1_ASM279425v1	Scaffold	Streptomyces carminius	97.76	7200897	0	95	NO	NO	NO	NO
GCF_003112575.1_ASM311257v1	Contig	Streptomyces ardesiacus	100	7851547	0	95	NO	NO	NO	NO
GCF_003130705.1_ASM313070v1	Complete Genome	Rhodococcus oxybenzonivorans	99.02	8014224	0	95	NO	NO	NO	NO
GCF_004103825.1_ASM410382v1	Scaffold	Hansschlegelia zhihuaiae	98.17	4621517	0	95	YES	NO	YES	YES
GCF_005517195.1_ASM551719v1	Complete Genome	Streptomyces vilmorinianum	99.94	7646296	0	95	NO	NO	NO	NO
GCF_008704555.1_ASM870455v1	Complete Genome	Streptomyces nitrosporeus	99.85	7581562	0	95	NO	NO	NO	NO
GCF_010550675.1_ASM1055067v1	Scaffold	Phytoactinopolyspora halotolerans	98.15	7303666	0	95	NO	NO	NO	NO
GCF_010993745.1_ASM1099374v1	Contig	Fodinicola acaciae	96.92	8860993	0	95	NO	NO	NO	NO
GCF_010993775.1_ASM1099377v1	Contig	Fodinicola feengrottensis	49.92	8711677	0	95	NO	NO	NO	NO
GCF_012034175.1_ASM1203417v1	Contig	Actinacidiphila epipremni	99.05	8247479	0	95	NO	NO	NO	NO
GCF_013394065.1_ASM1339406v1	Complete Genome	Streptomyces rectiverticillatus	99.53	7679243	0	95	NO	NO	NO	NO
GCF_014646115.1_ASM1464611v1	Scaffold	Streptomyces camponoticapitis	99.15	8278499	0	95	NO	NO	NO	NO
GCF_014648695.1_ASM1464869v1	Scaffold	Streptomyces albospinus	99.08	9206985	0	95	NO	NO	NO	NO
GCF_014649195.1_ASM1464919v1	Scaffold	Streptomyces bellus	99.91	9421870	0	95	NO	NO	NO	NO
GCF_014655955.1_ASM1465595v1	Scaffold	Kitasatospora indigofera	97.99	9417550	0	95	NO	NO	NO	NO
GCF_014656215.1_ASM1465621v1	Contig	Streptomyces zaomyceticus	99.53	8311400	0	95	NO	NO	NO	NO
GCF_014904705.1_ASM1490470v1	Contig	Nisaea sediminum	93.36	5022643	1	95	YES	NO	YES	YES
GCF_015244315.1_ASM1524431v1	Complete Genome	Streptomyces olivaceus	99.53	8458055	0	95	NO	NO	NO	NO
GCF_015694345.1_ASM1569434v1	Contig	Novosphingobium jiangmenense	93.04	4080833	40	95	YES	YES	YES	YES
GCF_016031615.1_ASM1603161v1	Contig	Streptomyces pactum	96.24	7808990	0	95	NO	NO	NO	NO
GCF_016698665.1_ASM1669866v1	Chromosome	Devosia rhizoryzae	97.43	3524978	0	95	YES	NO	YES	YES
GCF_016806835.2_ASM1680683v2	Complete Genome	Skermanella rosea	98.99	7759404	0	95	YES	NO	YES	YES
GCF_016863435.1_ASM1686343v1	Contig	Sinosporangium siamense	78.61	8856722	0	95	NO	NO	NO	NO
GCF_017676365.1_ASM1767636v1	Contig	Streptomyces oryzae	99.43	7708393	0	95	NO	NO	NO	NO
GCF_018390555.1_ASM1839055v1	Scaffold	Ancylobacter oerskovii	94.88	5480425	0	95	YES	NO	YES	YES
GCF_020532645.1_ASM2053264v1	Contig	Streptomyces bambusae	98.39	8305856	0	95	NO	NO	NO	NO
GCF_020881015.1_ASM2088101v1	Contig	Streptomyces rochei	100	8346014	0	95	NO	NO	NO	NO
GCF_025822605.1_ASM2582260v1	Scaffold	Mycolicibacterium komossense	100	6920863	0	95	NO	NO	NO	NO
GCF_026183675.1_ASM2618367v1	Scaffold	Microbulbifer halophilus	100	4655510	0	95	YES	YES	YES	YES
GCF_029854435.1_ASM2985443v1	Complete Genome	Neorhizobium petrolearium	99.56	6855582	0	95	YES	NO	YES	YES
GCF_030160815.1_ASM3016081v1	Scaffold	Hydrogenophaga electricum	98.55	4764223	22	95	YES	YES	YES	YES
GCF_000013985.1_ASM1398v1	Complete Genome	Sphingopyxis alaskensis RB2256	98.23	3373713	0	94	YES	YES	YES	YES
GCF_000400635.2_ASM40063v2	Complete Genome	Amycolatopsis keratiniphila	98.89	8982090	0	94	NO	NO	NO	NO
GCF_000415505.1_STAFG	Scaffold	Streptomyces afghaniensis 772	95.05	9848774	0	94	NO	NO	NO	NO
GCF_000421645.1_ASM42164v1	Contig	Aurantimonas coralicida DSM 14790	98.69	4615647	0	94	YES	NO	YES	YES
GCF_000429865.1_ASM42986v1	Scaffold	Cucumibacter marinus DSM 18995	99.13	3713661	3	94	YES	NO	YES	YES
GCF_000718625.1_ASM71862v1	Contig	Streptomyces lavenduligriseus	99.91	8716851	0	94	NO	NO	NO	NO
GCF_000935125.1_SNA_1.0	Contig	Streptomyces natalensis ATCC 27448	99.53	8651730	0	94	NO	NO	NO	NO
GCF_002804165.1_ASM280416v1	Complete Genome	Streptomyces cavourensis	99.86	7600475	0	94	NO	NO	NO	NO
GCF_008365385.1_ASM836538v1	Contig	Halopseudomonas laoshanensis	92.95	4106373	54	94	YES	YES	YES	YES
GCF_008923365.1_ASM892336v1	Scaffold	Actinomadura montaniterrae	97.45	10704999	0	94	NO	NO	NO	NO
GCF_009600885.1_ASM960088v1	Scaffold	Streptomyces jumonjinensis	98.43	8465075	0	94	NO	NO	NO	NO
GCF_009687845.1_ASM968784v1	Scaffold	Acrocarpospora corrugata	83.97	9271625	0	94	NO	NO	NO	NO
GCF_009756665.1_ASM975666v1	Complete Genome	Permianibacter aggregans	77.38	4266648	19	94	YES	YES	YES	YES
GCF_011044975.1_ASM1104497v1	Contig	Streptomyces coryli	98.72	9031846	0	94	NO	NO	NO	NO
GCF_014174475.1_ASM1417447v1	Scaffold	Pseudomonas ullengensis	98.56	4626005	49	94	NO	NO	YES	NO
GCF_014203645.1_ASM1420364v1	Contig	Streptomyces zagrosensis	97.13	8746444	0	94	NO	NO	NO	NO
GCF_014297465.1_ASM1429746v1	Scaffold	Ramlibacter cellulosilyticus	96.18	5526610	11	94	NO	NO	YES	NO
GCF_014395425.1_ASM1439542v1	Complete Genome	Thermomonas brevis	95.79	3435501	60	94	YES	YES	YES	YES
GCF_014649015.1_ASM1464901v1	Scaffold	Streptomyces narbonensis	99.91	7730059	0	94	NO	NO	NO	NO
GCF_014650795.1_ASM1465079v1	Scaffold	Streptomyces anthocyanicus	99.81	8674739	0	94	NO	NO	NO	NO
GCF_014701095.1_ASM1470109v1	Complete Genome	Streptomyces tuirus	99.91	7561001	0	94	NO	NO	NO	NO
GCF_016741815.1_ASM1674181v1	Contig	Nocardia acididurans	97.04	8382712	0	94	NO	NO	NO	NO
GCF_016741855.1_ASM1674185v1	Contig	Streptomyces musisoli	100	9364856	0	94	NO	NO	NO	NO
GCF_016862275.1_ASM1686227v1	Contig	Actinoplanes nipponensis	90.85	8952901	0	94	NO	NO	NO	NO
GCF_017876295.1_ASM1787629v1	Contig	Kribbella aluminosa	95.38	8936317	0	94	NO	NO	NO	NO
GCF_025061645.1_ASM2506164v1	Scaffold	Umezawaea endophytica	99.83	11023148	0	94	NO	NO	NO	NO
GCF_027925305.1_ASM2792530v1	Contig	Desulforhabdus amnigena	89.88	4536740	0	94	NO	NO	NO	NO
GCF_900105055.1_IMG-taxon_2634166339_annotated_assembly	Contig	Amycolatopsis lurida	99	9047228	0	94	NO	NO	NO	NO
GCF_900168195.1_IMG-taxon_2595698224_annotated_assembly	Contig	Bosea thiooxidans	99.59	5369373	0	94	YES	NO	YES	YES
GCF_900659615.1_LMG29177_FinalContigs.fasta.gz	Contig	Actinomadura fibrosa	96.43	10915467	0	94	NO	NO	NO	NO
GCF_000178855.1_ASM17885v1	Scaffold	Ktedonobacter racemifer DSM 44963	98.54	13661586	0	93	NO	NO	YES	NO
GCF_000518265.1_ASM51826v1	Scaffold	Actinomadura oligospora ATCC 43269	98.65	9353665	0	93	NO	NO	NO	NO
GCF_000739045.1_ASM73904v1	Scaffold	Streptomyces mutabilis	99.24	7829169	0	93	NO	NO	NO	NO
GCF_001417755.1_ASM141775v1	Scaffold	Nonomuraea pusilla	90.25	8992127	0	93	NO	NO	NO	NO
GCF_001700505.1_ASM170050v1	Scaffold	Streptomyces mutomycini	97.85	7070041	0	93	NO	NO	NO	NO
GCF_001704635.1_ASM170463v1	Contig	Streptomyces sparsogenes	98.01	8907947	0	93	NO	NO	NO	NO
GCF_001735805.1_ASM173580v1	Complete Genome	Streptomyces fodineus	98.83	9698948	0	93	NO	NO	NO	NO
GCF_002155685.1_ASM215568v1	Scaffold	Erythrobacter colymbi	92.02	4309205	3	93	YES	YES	YES	YES
GCF_003270085.1_ASM327008v1	Contig	Streptomyces triticisoli	98.22	6844226	0	93	NO	NO	NO	NO
GCF_003355155.1_ASM335515v1	Chromosome	Streptomyces armeniacus	99.4	8083249	0	93	NO	NO	NO	NO
GCF_004122735.1_ASM412273v1	Contig	Streptomyces sioyaensis	99.84	7847945	0	93	NO	NO	NO	NO
GCF_006151805.1_ASM615180v1	Scaffold	Methylobacterium terricola	99.12	7873283	0	93	YES	NO	NO	NO
GCF_006539505.1_ASM653950v1	Contig	Streptomyces spinoverrucosus	99.91	9220073	0	93	NO	NO	NO	NO
GCF_008477545.1_ASM847754v1	Contig	Roseibium aestuarii	99.86	4353438	0	93	YES	NO	YES	YES
GCF_008932075.1_ASM893207v1	Scaffold	Streptomyces arboris	99.91	8300205	0	93	NO	NO	NO	NO
GCF_011764445.1_ASM1176444v1	Contig	Phytohabitans rumicis	85.93	10714690	0	93	NO	NO	NO	NO
GCF_014191055.1_ASM1419105v1	Scaffold	Microvirga lupini	73.74	4945970	0	93	YES	NO	YES	YES
GCF_014639875.1_ASM1463987v1	Contig	Blastomonas aquatica	100	3712001	23	93	YES	YES	NO	YES
GCF_014646355.1_ASM1464635v1	Scaffold	Nonomuraea cavernae	87.48	8123920	0	93	NO	NO	NO	NO
GCF_014649595.1_ASM1464959v1	Contig	Streptomyces griseomycini	99.91	8292334	0	93	NO	NO	NO	NO
GCF_014650435.1_ASM1465043v1	Scaffold	Streptomyces tendae	99.57	8887909	0	93	NO	NO	NO	NO
GCF_014650775.1_ASM1465077v1	Contig	Streptomyces cirratus	99.61	7269234	0	93	NO	NO	NO	NO
GCF_014654095.1_ASM1465409v1	Scaffold	Amycolatopsis bartoniae	98.4	7813348	0	93	NO	NO	NO	NO
GCF_014654935.1_ASM1465493v1	Scaffold	Streptomyces capoamus	97.55	8406486	0	93	NO	NO	NO	NO
GCF_016613535.2_ASM1661353v2	Complete Genome	Lysobacter solisilvae	84.83	3933292	8	93	YES	YES	YES	YES
GCF_016862155.1_ASM1686215v1	Contig	Actinoplanes digitatis	91.04	9068915	0	93	NO	NO	NO	NO
GCF_016862175.1_ASM1686217v1	Contig	Actinoplanes durhamensis	94.44	10509825	0	93	NO	NO	NO	NO
GCF_016862935.1_ASM1686293v1	Contig	Plantactinospora mayteni	95.11	9841081	0	93	NO	NO	NO	NO
GCF_017347565.1_ASM1734756v1	Complete Genome	Methylobacterium indicum	99.33	7052747	0	93	YES	NO	NO	NO
GCF_017353455.1_ASM1735345v1	Scaffold	Streptomyces laculatispora	83.96	7316623	0	93	NO	NO	NO	NO
GCF_019083965.1_ASM1908396v1	Scaffold	Catellatospora tritici	94.42	9586736	0	93	NO	NO	NO	NO
GCF_023559145.1_ASM2355914v1	Complete Genome	Wolbachia endosymbiont of Ostrinia scapulalis	99.09	1320340	0	93	YES	NO	YES	YES
GCF_024753245.1_ASM2475324v1	Contig	Massilia norwichensis	90.88	5844102	70	93	YES	NO	YES	YES
GCF_026343855.1_ASM2634385v1	Contig	Kaistia nematophila	90.08	5165915	0	93	YES	YES	YES	YES
GCF_027626975.1_ASM2762697v1	Complete Genome	Streptomyces nigrescens	99.84	9534571	0	93	NO	NO	NO	NO
GCF_030709675.1_ASM3070967v1	Contig	Actinoplanes lichenis	91.35	9012640	0	93	NO	NO	NO	NO
GCF_900188005.1_IMG-taxon_2724679777_annotated_assembly	Scaffold	Actinoplanes regularis	93.67	10031706	0	93	NO	NO	NO	NO
GCF_000379685.1_ASM37968v1	Scaffold	Catelliglobosispora koreensis DSM 44566	92.06	7688589	0	92	NO	NO	NO	NO
GCF_000428945.1_ASM42894v1	Scaffold	Hamadaea tsunoensis DSM 44101	94.42	9478888	0	92	NO	NO	NO	NO
GCF_000718455.1_ASM71845v1	Contig	Streptomyces globisporus subsp. globisporus	99.11	7454528	0	92	NO	NO	NO	NO
GCF_001650635.1_ASM165063v1	Contig	Magnetospirillum moscoviense	91.77	4164497	14	92	YES	NO	YES	YES
GCF_001956315.1_ASM195631v1	Scaffold	Sphingomonas montana	98.11	3722743	0	92	YES	NO	YES	YES
GCF_002891295.1_ASM289129v1	Contig	Streptomyces eurocidicus	98.8	7931574	0	92	NO	NO	NO	NO
GCF_003330725.1_ASM333072v1	Complete Genome	Acidisarcina polymorpha	98.86	7600726	0	92	YES	NO	YES	YES
GCF_003347635.1_ASM334763v1	Contig	Sphingosinicella terrae	98.46	4950502	1	92	NO	NO	YES	NO
GCF_003350445.1_ASM335044v1	Scaffold	Lentzea flaviverrucosa	97.18	9468454	0	92	NO	NO	NO	NO
GCF_004296575.1_ASM429657v1	Contig	Dyella amyloliquefaciens	100	4834900	12	92	NO	NO	NO	NO
GCF_006636205.1_ASM663620v1	Contig	Kitasatospora acidiphila	91.23	8581260	0	92	NO	NO	NO	NO
GCF_008364685.1_ASM836468v1	Scaffold	Xanthobacter oligotrophicus	95.63	5313426	0	92	YES	NO	YES	YES
GCF_011067745.1_ASM1106774v1	Scaffold	Lentzea alba	99	10211123	0	92	NO	NO	NO	NO
GCF_014055025.1_ASM1405502v1	Complete Genome	Neisseria bacilliformis	97.36	2492712	59	92	NO	NO	NO	NO
GCF_014197035.1_ASM1419703v1	Scaffold	Sphingobium scionense	94.87	5959969	4	92	YES	YES	YES	YES
GCF_014280945.1_ASM1428094v1	Contig	Streptomyces salinarius	100	8429580	0	92	NO	NO	NO	NO
GCF_014636935.1_ASM1463693v1	Scaffold	Alsobacter metallidurans	99.18	5082645	0	92	YES	YES	YES	YES
GCF_014648995.1_ASM1464899v1	Scaffold	Streptomyces massasporeus	100	9073213	0	92	NO	NO	NO	NO
GCF_014650575.1_ASM1465057v1	Contig	Streptomyces naganishii JCM 4654	99.24	7809671	0	92	NO	NO	NO	NO
GCF_014764405.1_ASM1476440v1	Complete Genome	Micromonospora craniellae	88.49	6839926	0	92	NO	NO	NO	NO
GCF_014873935.1_ASM1487393v1	Contig	Actinomadura algeriensis	97.06	8612339	0	92	NO	NO	NO	NO
GCF_016860525.1_ASM1686052v1	Contig	Streptomyces rubradiris	99.91	9051737	0	92	NO	NO	NO	NO
GCF_016862195.1_ASM1686219v1	Contig	Actinoplanes ferrugineus	93.29	9409405	0	92	NO	NO	NO	NO
GCF_016862995.1_ASM1686299v1	Contig	Acrocarpospora phusangensis	83.5	9111823	0	92	NO	NO	NO	NO
GCF_016906185.1_ASM1690618v1	Complete Genome	Streptomyces californicus	100	8031696	0	92	NO	NO	NO	NO
GCF_018499875.1_ASM1849987v1	Contig	Kineosporia corallincola	99.16	8202634	0	92	NO	NO	NO	NO
GCF_019219635.1_ASM1921963v1	Scaffold	Streptomyces halstedii	99.53	7631617	0	92	NO	NO	NO	NO
GCF_023559125.1_ASM2355912v1	Complete Genome	Wolbachia endosymbiont of Ostrinia furnacalis	99.09	1321828	0	92	YES	NO	YES	YES
GCF_029223525.1_ASM2922352v1	Contig	Streptantibioticus ferralitis	99.24	8795397	0	92	NO	NO	NO	NO
GCF_900100315.1_IMG-taxon_2675903130_annotated_assembly	Scaffold	Streptomyces indicus	99.53	8228196	0	92	NO	NO	NO	NO
GCF_900104175.1_IMG-taxon_2675903132_annotated_assembly	Scaffold	Lentzea jiangxiensis	98.51	8591279	0	92	NO	NO	NO	NO
GCF_900110955.1_IMG-taxon_2667527444_annotated_assembly	Scaffold	Lentzea xinjiangensis	98.76	8684108	0	92	NO	NO	NO	NO
GCF_900631955.1_aCIP1116281.1	Contig	Devosia equisanguinis	98.25	4128236	0	92	YES	NO	YES	YES
GCF_000225525.1_ASM22552v1	Contig	Streptomyces zinciresistens K42	100	8221694	0	91	NO	NO	NO	NO
GCF_000379825.1_ASM37982v1	Scaffold	Longispora albida DSM 44784	93.53	6821241	0	91	NO	NO	NO	NO
GCF_000717745.1_ASM71774v1	Contig	Streptomyces violens	99.53	7941520	0	91	NO	NO	NO	NO
GCF_000934745.1_ASM93474v1	Scaffold	Desulfonatronum thioautotrophicum	97.92	4634603	29	91	YES	NO	YES	NO
GCF_001514125.1_ASM151412v1	Scaffold	Streptomyces longwoodensis	100	8363623	0	91	NO	NO	NO	NO
GCF_001551835.1_ASM155183v1	Scaffold	Dechloromonas denitrificans	95.34	4238526	39	91	YES	YES	YES	YES
GCF_002939475.1_ASM293947v1	Contig	Streptomyces cinnamoneus	100	6662690	0	91	NO	NO	NO	NO
GCF_003258295.1_ASM325829v1	Scaffold	Streptacidiphilus pinicola	95.93	8432874	0	91	NO	NO	NO	NO
GCF_003323745.1_ASM332374v1	Scaffold	Sphaerisporangium album	85.45	9305065	0	91	NO	NO	NO	NO
GCF_004745635.1_ASM474563v1	Contig	Methylobacterium nonmethylotrophicum	98.95	7831372	0	91	NO	NO	NO	NO
GCF_004792695.1_ASM479269v1	Scaffold	Sphingomonas naasensis	99.36	4339567	0	91	YES	NO	YES	YES
GCF_007829995.1_ASM782999v1	Contig	Micromonospora sagamiensis	92.86	6928726	0	91	NO	NO	NO	NO
GCF_007989425.1_ASM798942v1	Complete Genome	Rickettsia asiatica	97.59	1419085	10	91	YES	NO	YES	YES
GCF_008274695.1_ASM827469v1	Contig	Sphingomonas montanisoli	99.14	4115974	0	91	YES	NO	YES	YES
GCF_009569385.1_ASM956938v1	Contig	Streptomyces kaniharaensis	98.47	8774359	0	91	NO	NO	NO	NO
GCF_011045195.1_ASM1104519v1	Chromosome	Caulobacter soli	96.87	5677014	0	91	YES	NO	YES	YES
GCF_011440395.1_ASM1144039v1	Scaffold	Pseudomaricurvus alcaniphilus	100	5427463	11	91	YES	YES	YES	YES
GCF_011764545.1_ASM1176454v1	Complete Genome	Phytohabitans flavus	81.25	9607004	0	91	NO	NO	NO	NO
GCF_014205085.1_ASM1420508v1	Contig	Actinomadura catellatispora	94.85	8203588	0	91	NO	NO	NO	NO
GCF_014648675.1_ASM1464867v1	Scaffold	Actinomadura livida	94.23	8149099	0	91	NO	NO	NO	NO
GCF_014649035.1_ASM1464903v1	Contig	Streptomyces sindenensis	99.86	7564582	0	91	NO	NO	NO	NO
GCF_014649795.1_ASM1464979v1	Scaffold	Streptomyces melanogenes	99.91	9581670	0	91	NO	NO	NO	NO
GCF_014697215.1_ASM1469721v1	Complete Genome	Saccharopolyspora pogona	99.92	9608180	0	91	NO	NO	NO	NO
GCF_014904795.1_ASM1490479v1	Contig	Nisaea nitritireducens	96.75	4842169	3	91	YES	NO	YES	YES
GCF_015694465.1_ASM1569446v1	Contig	Microvirga alba	68.29	4424757	0	91	YES	NO	YES	YES
GCF_016862955.1_ASM1686295v1	Contig	Rhizocola hellebori	93.33	10769095	0	91	NO	NO	NO	NO
GCF_017352335.1_ASM1735233v1	Complete Genome	Streptomyces nodosus	99.91	7621081	0	91	NO	NO	NO	NO
GCF_019793465.1_ASM1979346v1	Contig	Rhizobium croatiense	99.94	6408074	0	91	YES	NO	YES	YES
GCF_020511115.1_ASM2051111v1	Contig	Luteimonas panaciterrae	84.19	4093429	47	91	YES	YES	YES	YES
GCF_020783455.1_ASM2078345v1	Complete Genome	Streptomyces anulatus	99.91	8690773	0	91	NO	NO	NO	NO
GCF_022221585.1_ASM2222158v1	Complete Genome	Streptomyces inhibens	99.56	9696490	0	91	NO	NO	NO	NO
GCF_022751215.1_ASM2275121v1	Scaffold	Actinomadura terrae	94.22	8962862	0	91	NO	NO	NO	NO
GCF_900110255.1_IMG-taxon_2671180039_annotated_assembly	Scaffold	Actinacidiphila rubida	98.77	9005705	0	91	NO	NO	NO	NO
GCF_900115005.1_IMG-taxon_2671180038_annotated_assembly	Scaffold	Pseudonocardia ammonioxydans	93.73	7361511	0	91	NO	NO	NO	NO
GCF_947179505.1_iyDolMedi1.Wolbachia_sp_1.1	Contig	Wolbachia endosymbiont (group B) of Dolichovespula media	98.73	1685384	0	91	YES	NO	YES	YES
GCF_000620785.1_ASM62078v1	Scaffold	Pseudonocardia acaciae DSM 45401	98.13	9931328	0	90	NO	NO	NO	NO
GCF_000720485.1_ASM72048v1	Contig	Streptomyces ochraceiscleroticus	99.85	8408570	0	90	NO	NO	NO	NO
GCF_000829715.2_ASM82971v2	Scaffold	Streptomyces lydicamycinicus	99.88	8319549	0	90	NO	NO	NO	NO
GCF_001043975.1_ASM104397v1	Contig	Methylobacterium variabile	92.64	7433592	0	90	NO	NO	NO	NO
GCF_001419745.1_ASM141974v1	Scaffold	Streptomyces silaceus	97.1	8744139	0	90	NO	NO	NO	NO
GCF_001552175.1_ASM155217v1	Contig	Actinomadura kijaniata NBRC 14229	96.11	10258935	0	90	NO	NO	NO	NO
GCF_001650715.1_ASM165071v1	Scaffold	Paramagnetospirillum marisnigri	99.56	4619819	4	90	YES	NO	YES	YES
GCF_002148965.1_ASM214896v1	Scaffold	Streptomyces swartbergensis	97.92	9204779	0	90	NO	NO	NO	NO
GCF_003046295.1_ASM304629v1	Scaffold	Sphingomonas aerolata	99.19	3827482	5	90	YES	YES	YES	YES
GCF_003385235.1_ASM338523v1	Contig	Amycolatopsis circi	98.22	9804613	0	90	NO	NO	NO	NO
GCF_005233835.1_ASM523383v1	Contig	Herbidospora galbida	82.37	8314612	0	90	NO	NO	NO	NO
GCF_005869865.1_ASM586986v1	Contig	Streptomyces tibetensis	99.24	8993737	0	90	NO	NO	NO	NO
GCF_007745175.1_ASM774517v1	Chromosome	Caulifigura coniformis	98.11	6761146	0	90	NO	NO	NO	NO
GCF_008123425.1_ASM812342v1	Scaffold	Bradyrhizobium rifense	98.96	9952932	0	90	NO	NO	YES	NO
GCF_013155545.1_ASM1315554v1	Contig	Caenimonas soli	98.99	5637765	0	90	YES	NO	YES	YES
GCF_014141525.1_ASM1414152v1	Contig	Streptomyces calidiresistens	95.9	6196881	0	90	NO	NO	NO	NO
GCF_014648775.1_ASM1464877v1	Contig	Streptomyces abikoensis	100	7000866	0	90	NO	NO	NO	NO
GCF_014650815.1_ASM1465081v1	Scaffold	Streptomyces flavofungini	99.05	9312928	0	90	NO	NO	NO	NO
GCF_014651015.1_ASM1465101v1	Scaffold	Streptomyces xantholiticus	100	7810960	0	90	NO	NO	NO	NO
GCF_016765655.2_ASM1676565v2	Complete Genome	Skermanella mucosa	99.42	7840710	0	90	YES	NO	YES	YES
GCF_018398275.1_ASM1839827v1	Contig	Chelatococcus asaccharovorans	96.34	7299678	0	90	YES	YES	YES	YES
GCF_019175365.1_ASM1917536v1	Complete Genome	Actinomadura graeca	93.67	8979594	0	90	NO	NO	NO	NO
GCF_022524485.1_ASM2252448v1	Contig	Pseudonocardia alaniniphila	96.6	9366278	0	90	NO	NO	NO	NO
GCF_023923245.1_ASM2392324v1	Complete Genome	Streptomyces phaeoluteigriseus	100	9118447	0	90	NO	NO	NO	NO
GCF_024137025.1_ASM2413702v1	Contig	Actinoplanes aksuensis	93.07	10010471	0	90	NO	NO	NO	NO
GCF_900100955.1_IMG-taxon_2663762758_annotated_assembly	Scaffold	Lentzea fradiae	98.76	8508028	0	90	NO	NO	NO	NO
GCF_900101585.1_IMG-taxon_2663762722_annotated_assembly	Scaffold	Streptomyces prasinopilosus	100	7125330	0	90	NO	NO	NO	NO
GCF_900176525.1_IMG-taxon_2595698253_annotated_assembly	Scaffold	Lentzea albidocapillata	98.41	8639486	0	90	NO	NO	NO	NO
GCF_000718095.1_ASM71809v1	Contig	Streptomyces scopuliridis RB72	99.24	8243500	0	89	NO	NO	NO	NO
GCF_000719265.1_ASM71926v1	Contig	Streptomyces roseoverticillatus	98.85	7205477	0	89	NO	NO	NO	NO
GCF_001854695.1_ASM185469v1	Contig	Parafrankia soli	98.84	8032739	0	89	NO	NO	NO	NO
GCF_002150765.1_ASM215076v1	Scaffold	Lentzea kentuckyensis	95.84	10210611	0	89	NO	NO	NO	NO
GCF_003002815.1_ASM300281v1	Scaffold	Umezawaea tangerina	99.5	10685010	0	89	NO	NO	NO	NO
GCF_003011965.1_ASM301196v1	Contig	Streptosporangium nondiastaticum	72.03	8034861	0	89	NO	NO	NO	NO
GCF_003627815.1_ASM362781v1	Complete Genome	Streptomyces hundungensis	98.77	8393044	0	89	NO	NO	NO	NO
GCF_005280195.1_ASM528019v1	Scaffold	Streptomyces galbus	99.91	7836436	0	89	NO	NO	NO	NO
GCF_007833215.1_ASM783321v1	Complete Genome	Sphingomonas suaedae	97.53	4154291	1	89	YES	NO	YES	YES
GCF_011044995.1_ASM1104499v1	Scaffold	Streptomyces mesophilus	99.4	8988266	0	89	NO	NO	NO	NO
GCF_014138665.1_ASM1413866v1	Scaffold	Actinomadura namibiensis	96.41	9760791	0	89	NO	NO	NO	NO
GCF_014196495.1_ASM1419649v1	Scaffold	Sphingobium jiangsuense	87.27	4819475	0	89	YES	NO	YES	YES
GCF_014207795.1_ASM1420779v1	Contig	Kribbella sandramycini	99.93	8120153	0	89	NO	NO	NO	NO
GCF_014645895.1_ASM1464589v1	Scaffold	Streptomyces daqingensis	98.59	6537491	0	89	NO	NO	NO	NO
GCF_014646155.1_ASM1464615v1	Scaffold	Mangrovihabitans endophyticus	96.84	7581334	0	89	NO	NO	NO	NO
GCF_014648635.1_ASM1464863v1	Scaffold	Streptomyces cinerochromogenes	100	9098877	0	89	NO	NO	NO	NO
GCF_014650175.1_ASM1465017v1	Contig	Streptomyces termitum	99.94	7137690	0	89	NO	NO	NO	NO
GCF_014656115.1_ASM1465611v1	Scaffold	Streptomyces morookaense	99.91	7418596	0	89	NO	NO	NO	NO
GCF_019933235.1_ASM1993323v1	Complete Genome	Streptomyces angustmyceticus	99.62	8116382	0	89	NO	NO	NO	NO
GCF_020089865.1_ASM2008986v1	Scaffold	Microvirga puerhi	72.97	5165995	0	89	YES	NO	YES	YES
GCF_020216025.1_ASM2021602v1	Contig	Jidongwangia harbinensis	96	9743280	0	89	NO	NO	NO	NO
GCF_021474405.1_ASM2147440v1	Contig	Streptomyces indiaensis	99.34	7814613	0	89	NO	NO	NO	NO
GCF_025822555.1_ASM2582255v1	Contig	Mycobacterium hackensackense	99.3	6709978	0	89	NO	NO	NO	NO
GCF_028607085.1_ASM2860708v1	Complete Genome	Sphingomonas naphthae	98.57	4310851	0	89	YES	NO	YES	YES
GCF_029589435.1_ASM2958943v1	Contig	Paludisphaera mucosa	94.12	8211357	0	89	NO	NO	NO	NO
GCF_900141985.1_IMG-taxon_2675903133_annotated_assembly	Scaffold	Nocardiopsis flavescens	96.69	7172933	0	89	NO	NO	NO	NO
GCF_000258535.2_ASM25853v2	Complete Genome	Paenibacillus mucilaginosus K02	97.6	8819200	0	88	NO	NO	NO	NO
GCF_000716545.1_ASM71654v1	Contig	Kitasatospora phosalacinea	96.16	7620895	0	88	NO	NO	NO	NO
GCF_000717315.1_ASM71731v1	Contig	Actinospica acidiphila		7309272	0	88	NO	NO	NO	NO
GCF_000787855.1_ASM78785v1	Scaffold	Streptacidiphilus anmyonensis	97.12	9386419	0	88	NO	NO	NO	NO
GCF_000836635.1_ASM83663v1	Contig	Kitasatospora griseola	96.72	7966157	0	88	NO	NO	NO	NO
GCF_000980885.2_ASM98088v2	Contig	Streptomyces malaysiense	99.62	7963326	0	88	NO	NO	NO	NO
GCF_001528665.1_ASM152866v1	Scaffold	Microtetraspora malaysiensis	82.2	8822209	0	88	NO	NO	NO	NO
GCF_001570565.1_ASM157056v1	Scaffold	Herbidospora yilanensis	82.85	7857004	0	88	NO	NO	NO	NO
GCF_001584225.1_ASM158422v1	Complete Genome	Collimonas pratensis	99.43	5585899	36	88	YES	NO	YES	YES
GCF_001984445.1_ASM198444v1	Complete Genome	Streptomyces lydicus	99.53	8243179	0	88	NO	NO	NO	NO
GCF_002150735.1_ASM215073v1	Scaffold	Streptomyces africanus	96.69	9115570	0	88	NO	NO	NO	NO
GCF_002934265.1_ASM293426v1	Contig	Actinokineospora auranticolor	100	8431890	0	88	NO	NO	NO	NO
GCF_003315205.1_ASM331520v1	Scaffold	Roseimicrobium gellanilyticum	98.25	7930206	0	88	NO	NO	NO	NO
GCF_003387075.1_ASM338707v1	Contig	Asanoa ferruginea	94.62	9071909	0	88	NO	NO	NO	NO
GCF_007829875.1_ASM782987v1	Contig	Streptomyces capillispiralis	100	8432708	0	88	NO	NO	NO	NO
GCF_008704515.1_ASM870451v1	Complete Genome	Streptomyces viridosporus T7A	99.53	7280536	0	88	NO	NO	NO	NO
GCF_011682045.1_ASM1168204v1	Contig	Massilia aquatica	85.88	7465160	7	88	YES	NO	YES	YES
GCF_011762195.1_ASM1176219v1	Contig	Sphingomonas oligoaromativorans	98.87	3867692	1	88	YES	YES	YES	YES
GCF_012034385.1_ASM1203438v1	Scaffold	Streptomyces spiramenti	94.26	5708881	0	88	NO	NO	NO	NO
GCF_014205015.1_ASM1420501v1	Contig	Saccharothrix ecbatanensis	100	9689237	0	88	NO	NO	NO	NO
GCF_014208105.1_ASM1420810v1	Contig	Actinomadura coerulea	97.12	8190213	0	88	NO	NO	NO	NO
GCF_014297445.1_ASM1429744v1	Contig	Ramlibacter albus	93.26	6147598	10	88	NO	NO	NO	NO
GCF_014621695.1_ASM1462169v1	Complete Genome	Streptomyces xanthii	99.91	8354710	0	88	NO	NO	NO	NO
GCF_014646335.1_ASM1464633v1	Scaffold	Streptomyces lasiicapitis	99.53	9746447	0	88	NO	NO	NO	NO
GCF_014648875.1_ASM1464887v1	Scaffold	Streptomyces parvus	99.86	8032801	0	88	NO	NO	NO	NO
GCF_014649895.1_ASM1464989v1	Scaffold	Streptomyces rubiginosus	99.56	7308697	0	88	NO	NO	NO	NO
GCF_016773205.1_ASM1677320v1	Scaffold	Belnapia arida	99.87	6921666	0	88	NO	NO	NO	NO
GCF_016862635.1_ASM1686263v1	Contig	Catellatospora coxensis	96.02	9352350	0	88	NO	NO	NO	NO
GCF_016862915.1_ASM1686291v1	Contig	Plantactinospora endophytica	95.06	9685699	0	88	NO	NO	NO	NO
GCF_017357225.1_ASM1735722v1	Complete Genome	Rhizobium binae	99.71	7055288	0	88	YES	NO	YES	YES
GCF_029011865.1_ASM2901186v1	Complete Genome	Streptomyces yunnanensis	99.72	9982274	0	88	NO	NO	NO	NO
GCF_900230195.1_IMG-taxon_2718217652_annotated_assembly	Contig	Streptomyces zhaozhouensis	94.92	6532426	0	88	NO	NO	NO	NO
GCF_000373925.1_ASM37392v1	Scaffold	Actinopolymorpha alba DSM 45243	97.48	7983713	0	87	NO	NO	NO	NO
GCF_000382325.1_ASM38232v1	Scaffold	Woodsholea maritima DSM 17123	100	3105947	0	87	YES	NO	YES	YES
GCF_001570585.1_ASM157058v1	Scaffold	Herbidospora daliensis	82.69	8523669	0	87	NO	NO	NO	NO
GCF_002749615.1_ASM274961v1	Complete Genome	Caulobacter mirabilis	86.79	4577265	0	87	YES	NO	YES	YES
GCF_003665435.1_ASM366543v1	Complete Genome	Streptomyces fungicidicus	100	7667496	0	87	NO	NO	NO	NO
GCF_003667905.1_ASM366790v1	Complete Genome	Agrobacterium tumefaciens	96.59	5446032	0	87	YES	NO	YES	YES
GCF_004217545.1_ASM421754v1	Contig	Krasilnikovia cinnamomea	97.56	7616132	0	87	NO	NO	NO	NO
GCF_004366355.1_ASM436635v1	Contig	Dinghuibacter silviterrae	97.11	6497175	0	87	NO	NO	NO	NO
GCF_011008945.1_ASM1100894v1	Contig	Streptomyces harenosi	85.21	8000243	0	87	NO	NO	NO	NO
GCF_014203705.1_ASM1420370v1	Contig	Kitasatospora gansuensis	98.05	8296669	0	87	NO	NO	NO	NO
GCF_015679265.1_ASM1567926v1	Complete Genome	Pontivivens ytuae	99.61	4199362	0	87	YES	NO	YES	YES
GCF_016427565.1_ASM1642756v1	Contig	Microvirga splendida	73.28	5200315	0	87	YES	NO	YES	YES
GCF_016862575.1_ASM1686257v1	Contig	Catellatospora bangladeshensis	96.16	8828216	0	87	NO	NO	NO	NO
GCF_017498545.1_ASM1749854v1	Complete Genome	Sulfidibacter corallicola	79.65	11786365	0	87	NO	NO	YES	NO
GCF_017526105.1_ASM1752610v1	Complete Genome	Streptomyces cyanogenus	100	8773899	0	87	NO	NO	NO	NO
GCF_021129235.1_ASM2112923v1	Contig	Kineosporia mesophila	99.16	7783199	0	87	NO	NO	NO	NO
GCF_023653475.1_ASM2365347v1	Contig	Photobacterium galatheae	86.48	5470877	34	87	NO	NO	NO	NO
GCF_025403405.1_ASM2540340v1	Contig	Frankia tisae	98.26	7068637	0	87	NO	NO	NO	NO
GCF_027587205.1_ASM2758720v1	Contig	Solirubrobacter ginsenosidimutans	92.37	9690639	0	87	NO	NO	NO	NO
GCF_030269765.1_ASM3026976v1	Scaffold	Actinorhabdospora filicis	89.27	7221719	0	87	NO	NO	NO	NO
GCF_900013505.1_AHY_PRJEB12192_v1	Scaffold	Agrobacterium deltaense RV3	99.35	5283961	0	87	YES	NO	YES	YES
GCF_900090225.1_IMG-taxon_2622736604_annotated_assembly	Contig	Micromonospora eburnea	93.44	7185375	0	87	NO	NO	NO	NO
GCF_914271435.1_LMG_23992	Contig	Cupriavidus laharis	92.49	6108510	45	87	YES	NO	YES	YES
GCF_000718515.1_ASM71851v1	Contig	Micromonospora parva	98.16	7127351	0	86	NO	NO	NO	NO
GCF_001570405.1_ASM157040v1	Scaffold	Microtetraspora niveoalba	82.51	8469978	0	86	NO	NO	NO	NO
GCF_001687365.1_ASM168736v1	Contig	Pararhizobium polonicum	99.84	6265340	0	86	YES	NO	YES	YES
GCF_001700515.1_ASM170051v1	Scaffold	Streptomyces lushanensis	95.45	7542112	0	86	NO	NO	NO	NO
GCF_002082175.1_ASM208217v1	Complete Genome	Streptomyces violaceoruber	100	7916045	0	86	NO	NO	NO	NO
GCF_003667725.1_ASM366772v1	Complete Genome	Agrobacterium fabrum	99.35	5553114	0	86	YES	NO	YES	YES
GCF_003932715.1_ASM393271v1	Complete Genome	Streptomyces tsukubensis	99.36	8019548	0	86	NO	NO	NO	NO
GCF_004028635.1_ASM402863v1	Scaffold	Streptomyces cyaneus	100	9833661	0	86	NO	NO	NO	NO
GCF_004214935.1_ASM421493v1	Contig	Amycolatopsis suaedae	98.36	7543886	0	86	NO	NO	NO	NO
GCF_004331435.1_ASM433143v1	Contig	Kribbella sindirgiensis	99.09	8891727	0	86	NO	NO	NO	NO
GCF_004912135.1_ASM491213v1	Contig	Rhizobium rosettiformans W3	98.35	4977406	0	86	YES	NO	YES	YES
GCF_007830095.1_ASM783009v1	Contig	Micromonospora taraxaci	97.94	7208813	0	86	NO	NO	NO	NO
GCF_007991775.1_ASM799177v1	Contig	Skermanella aerolata	98.84	8537850	0	86	NO	NO	NO	NO
GCF_008121305.1_ASM812130v1	Contig	Actinomadura decatromicini	96.5	9304746	0	86	NO	NO	NO	NO
GCF_008704935.1_ASM870493v1	Complete Genome	Streptomyces vinaceus	99.89	7673509	0	86	NO	NO	NO	NO
GCF_009720245.1_ASM972024v1	Contig	Sphingomonas segetis	96.83	2861518	25	86	YES	YES	YES	YES
GCF_009765355.1_ASM976535v1	Scaffold	Amycolatopsis anabasis	97.82	10940472	0	86	NO	NO	NO	NO
GCF_014203855.1_ASM1420385v1	Contig	Kitasatospora kifunensis	98.43	9567486	0	86	NO	NO	NO	NO
GCF_014205295.1_ASM1420529v1	Contig	Kribbella solani	98.25	7851691	0	86	NO	NO	NO	NO
GCF_014230355.1_ASM1423035v1	Contig	Novosphingobium piscinae	90.45	3775046	0	86	YES	NO	YES	YES
GCF_014295035.1_ASM1429503v1	Complete Genome	Streptomyces buecherae	98.3	8416829	0	86	NO	NO	NO	NO
GCF_014295435.1_ASM1429543v1	Chromosome	Mycolicibacterium fluoranthenivorans	99.28	7117477	0	86	NO	NO	NO	NO
GCF_014358075.1_ASM1435807v1	Contig	Sphingomonas albertensis	94.89	4057404	0	86	YES	YES	YES	YES
GCF_014651115.1_ASM1465111v1	Scaffold	Streptomyces inusitatus	99.24	7867568	0	86	NO	NO	NO	NO
GCF_014656195.1_ASM1465619v1	Scaffold	Kitasatospora xanthocidica	97.73	9266420	0	86	NO	NO	NO	NO
GCF_017875555.1_ASM1787555v1	Contig	Amycolatopsis magusensis	98.32	9443615	0	86	NO	NO	NO	NO
GCF_018139695.1_ASM1813969v1	Contig	Actinospica durhamensis	98.99	9624076	0	86	NO	NO	NO	NO
GCF_018141665.1_ASM1814166v1	Complete Genome	Wolbachia endosymbiont of Spodoptera picta	99.27	1339720	0	86	YES	NO	YES	YES
GCF_020005195.1_ASM2000519v1	Contig	Azospirillum agricola	96.12	7770695	0	86	YES	NO	YES	YES
GCF_020521295.1_ASM2052129v1	Contig	Streptomyces violascens	98.86	8916662	0	86	NO	NO	NO	NO
GCF_020564935.1_ASM2056493v1	Contig	Streptomyces pinistramenti	99.18	7853467	0	86	NO	NO	NO	NO
GCF_020621385.1_ASM2062138v1	Contig	Acidisoma cellulosilyticum	99.12	6004381	0	86	YES	NO	YES	YES
GCF_021184025.1_ASM2118402v1	Complete Genome	Rhodopseudomonas boonkerdii	88.92	5632343	0	86	YES	NO	YES	YES
GCF_021502675.1_ASM2150267v1	Scaffold	Yinghuangia soli	92.68	9708286	0	86	NO	NO	NO	NO
GCF_023016525.1_ASM2301652v1	Contig	Ancylobacter koreensis	95.07	4057091	0	86	YES	NO	YES	YES
GCF_025264685.1_ASM2526468v1	Complete Genome	Dactylosporangium roseum	95.02	8220997	0	86	NO	NO	NO	NO
GCF_900100395.1_IMG-taxon_2675903066_annotated_assembly	Scaffold	Nonomuraea maritima	88.78	8267594	0	86	NO	NO	NO	NO
GCF_900114035.1_IMG-taxon_2675903226_annotated_assembly	Contig	Amycolatopsis sacchari	98.33	7587467	0	86	NO	NO	NO	NO
GCF_900187975.1_IMG-taxon_2706795031_annotated_assembly	Contig	Pseudomonas delhiensis	99.68	6727430	17	86	NO	NO	YES	NO
GCF_000504285.1_ASM50428v1	Scaffold	Actinospica robiniae DSM 44927	99.83	9918887	0	85	NO	NO	NO	NO
GCF_000525635.1_ASM52563v1	Complete Genome	Kutzneria albida DSM 43870	99.25	9874926	0	85	NO	NO	NO	NO
GCF_000632475.1_ASM63247v2	Complete Genome	Azospirillum argentinense	95.26	7391279	1	85	NO	NO	NO	NO
GCF_000717475.1_ASM71747v2	Contig	Desulfonatronum thiodismutans	99.19	3923654	25	85	NO	NO	NO	NO
GCF_000718635.1_ASM71863v1	Contig	Streptomyces varsoviensis	99.67	8588807	0	85	NO	NO	NO	NO
GCF_001305515.1_ASM130551v1	Scaffold	Prosthecomicrobium hirschii	99.18	6484983	0	85	YES	NO	YES	YES
GCF_001552215.1_ASM155221v1	Contig	Actinomadura macra NBRC 14102	94.79	9046351	0	85	NO	NO	NO	NO
GCF_003002065.1_ASM300206v1	Scaffold	Pseudosporangium ferrugineum	98.03	8653585	0	85	NO	NO	NO	NO
GCF_003427025.1_ASM342702v1	Contig	Jiangella endophytica	98.25	7850704	0	85	NO	NO	NO	NO
GCF_004305975.1_ASM430597v1	Scaffold	Streptomyces otsuchiensis	95.04	6150387	0	85	NO	NO	NO	NO
GCF_004801405.1_ASM480140v1	Contig	Cohnella fermenti	93.99	8522422	0	85	NO	NO	NO	NO
GCF_007747215.1_ASM774721v1	Complete Genome	Urbifossiella limnaea	97.69	7795793	0	85	NO	NO	YES	NO
GCF_007828865.1_ASM782886v1	Contig	Kribbella amoyensis	98.99	8120218	0	85	NO	NO	NO	NO
GCF_007828955.1_ASM782895v1	Contig	Kitasatospora atroaurantiaca	98.11	7871666	0	85	NO	NO	NO	NO
GCF_009380165.1_ASM938016v1	Scaffold	Rugamonas rivuli	100	6836110	28	85	NO	NO	NO	NO
GCF_009604375.1_ASM960437v1	Contig	Actinomadura macrotermitis	95.92	8535269	0	85	NO	NO	NO	NO
GCF_009811595.1_ASM981159v1	Contig	Streptomyces libani subsp. libani	99.94	9151272	0	85	NO	NO	NO	NO
GCF_009901565.1_ASM990156v1	Scaffold	Herbidospora solisilvae	83.59	8374830	0	85	NO	NO	NO	NO
GCF_012184385.1_ASM1218438v1	Scaffold	Lentzea indica	89.82	9967719	0	85	NO	NO	NO	NO
GCF_013404075.1_ASM1340407v1	Contig	Mycolicibacterium vinylchloridicum	99.82	7196491	0	85	NO	NO	NO	NO
GCF_014205255.1_ASM1420525v1	Contig	Streptomyces caelestis	100	8936092	0	85	NO	NO	NO	NO
GCF_014650615.1_ASM1465061v1	Scaffold	Streptomyces albaduncus	100	7929576	0	85	NO	NO	NO	NO
GCF_014651075.1_ASM1465107v1	Scaffold	Streptomyces djakartensis	100	7674449	0	85	NO	NO	NO	NO
GCF_015690345.1_ASM1569034v1	Contig	Plantactinospora alkalitolerans	95.79	9219182	0	85	NO	NO	NO	NO
GCF_016861995.1_ASM1686199v1	Contig	Actinoplanes abujensis	93.72	9263510	0	85	NO	NO	NO	NO
GCF_018736085.1_ASM1873608v1	Complete Genome	Bradyrhizobium sediminis	97.39	5554208	0	85	YES	YES	YES	YES
GCF_022179185.1_ASM2217918v1	Scaffold	Methylobacterium frigidaeris	98.7	7909330	0	85	NO	NO	YES	NO
GCF_022230905.1_ASM2223090v1	Contig	Micromonospora salmantinae	97.21	7012192	0	85	NO	NO	NO	NO
GCF_900091495.1_IMG-taxon_2622736613_annotated_assembly	Chromosome	Micromonospora echinospora	94.88	7775586	0	85	NO	NO	NO	NO
GCF_900188485.1_IMG-taxon_2675903059_annotated_assembly	Scaffold	Asanoa hainanensis	95.38	8644972	0	85	NO	NO	NO	NO
GCF_910593825.1_SBRY-DSM42138-v2	Contig	Actinacidiphila bryophytorum	98.77	8069042	0	85	NO	NO	NO	NO
GCF_000158955.1_ASM15895v1	Scaffold	Streptomyces viridochromogenes DSM 40736	96.78	8653262	0	84	NO	NO	NO	NO
GCF_000237845.1_ASM23784v1	Complete Genome	Rickettsia slovaca 13-B	97.83	1275089	18	84	NO	NO	NO	NO
GCF_000262405.1_ASM26240v1	Scaffold	Microvirga lotononidis	97.29	7082538	0	84	YES	YES	YES	YES
GCF_000269985.1_ASM26998v1	Complete Genome	Kitasatospora setae KM-6054	97.58	8783278	0	84	NO	NO	NO	NO
GCF_000585375.1_ASM58537v1	Scaffold	Cryptosporangium arvum DSM 44712	99.69	9195993	0	84	NO	NO	NO	NO
GCF_000717995.1_ASM71799v1	Contig	Streptomyces violaceorubidus	100	7651467	0	84	NO	NO	NO	NO
GCF_000720835.1_ASM72083v1	Contig	Streptomyces achromogenes subsp. achromogenes	99.53	8112410	0	84	NO	NO	NO	NO
GCF_000744785.1_ASM74478v1	Contig	Kitasatospora azatica KCTC 9699	97.23	8272299	0	84	NO	NO	NO	NO
GCF_000970455.1_ASM97045v1	Contig	Devosia soli	98.18	4136371	1	84	YES	NO	YES	YES
GCF_000993785.3_ASM99378v3	Complete Genome	Streptomyces xiamenensis	95.2	5961402	0	84	NO	NO	NO	NO
GCF_001008345.1_ASM100834v1	Contig	Streptomyces showdoensis	97.95	8146620	0	84	NO	NO	NO	NO
GCF_001187535.1_ASM118753v1	Contig	Rhizobium ecuadorense	99.71	7383497	0	84	YES	NO	YES	YES
GCF_001567585.1_ASM156758v1	Contig	Micromonospora rosaria	92.91	7383286	0	84	NO	NO	NO	NO
GCF_001613065.1_ASM161306v1	Contig	Nocardia miyunensis NBRC 108239	98.28	10520083	0	84	NO	NO	NO	NO
GCF_001613485.1_ASM161348v1	Contig	Nocardia rhamnosiphila NBRC 108938	97.36	7749274	0	84	NO	NO	NO	NO
GCF_001941625.1_ASM194162v1	Complete Genome	Actinoalloteichus fjordicus	97.99	7120854	0	84	NO	NO	NO	NO
GCF_002043005.1_ASM204300v1	Complete Genome	Martelella mediterranea DSM 17316	98.39	5693067	0	84	YES	NO	YES	YES
GCF_002356735.1_ASM235673v1	Chromosome	Rickettsia japonica	99.7	1283910	20	84	YES	NO	YES	YES
GCF_003112595.1_ASM311259v1	Scaffold	Streptomyces rubrogriseus	100	8454377	0	84	NO	NO	NO	NO
GCF_003130795.1_ASM313079v1	Complete Genome	Azospirillum thermophilum	91.12	6776313	1	84	NO	NO	NO	NO
GCF_003626575.1_ASM362657v1	Contig	Streptomyces radicis	97.57	7569598	0	84	NO	NO	NO	NO
GCF_006335015.1_ASM633501v1	Contig	Streptomyces sedi	95.23	6603797	0	84	NO	NO	NO	NO
GCF_006716445.1_ASM671644v1	Contig	Pseudonocardia kunmingensis	93.67	9138787	0	84	NO	NO	NO	NO
GCF_007747795.1_ASM774779v1	Complete Genome	Maioricimonas rarisocia	99.42	7744989	0	84	NO	NO	NO	NO
GCF_007992495.1_ASM799249v1	Contig	Reyranella soli	92.87	9846332	0	84	YES	NO	YES	YES
GCF_013347285.1_ASM1334728v1	Complete Genome	Azospirillum oryzae	96	6809363	10	84	NO	NO	NO	NO
GCF_013870535.1_ASM1387053v1	Contig	Streptomyces phytophilus	87	6906479	0	84	NO	NO	NO	NO
GCF_014145325.1_ASM1414532v1	Contig	Lysobacter spongiae	86.3	3640479	0	84	YES	NO	YES	YES
GCF_014204865.1_ASM1420486v1	Contig	Amycolatopsis jiangsuensis	98.9	8047834	0	84	NO	NO	NO	NO
GCF_014212125.1_ASM1421212v1	Scaffold	Cohnella nanjingensis	95.93	7611037	0	84	NO	NO	NO	NO
GCF_014642635.1_ASM1464263v1	Scaffold	Aureimonas endophytica	94.49	5332506	0	84	YES	NO	YES	YES
GCF_014673495.1_ASM1467349v1	Complete Genome	Streptomyces griseofuscus	99.91	9116672	0	84	NO	NO	NO	NO
GCF_016587455.1_ASM1658745v1	Contig	Reticulibacter mediterranei	99.21	12668978	0	84	NO	NO	YES	NO
GCF_016862515.1_ASM1686251v1	Contig	Asanoa iriomotensis	94.6	8569428	0	84	NO	NO	NO	NO
GCF_017676385.1_ASM1767638v1	Contig	Streptomyces spirodelae	98.58	7310765	0	84	NO	NO	NO	NO
GCF_019104725.1_ASM1910472v1	Contig	Streptomyces corallincola	96.21	6394983	0	84	NO	NO	NO	NO
GCF_022370635.2_ASM2237063v3	Complete Genome	Mycolicibacterium crocinum	99.48	6183573	0	84	NO	NO	NO	NO
GCF_024055725.1_ASM2405572v1	Contig	Actinoallomurus spadix	93.97	8025068	0	84	NO	NO	NO	NO
GCF_024626475.1_ASM2462647v1	Contig	Parerythrobacter lacustris	93.09	3064646	4	84	YES	YES	YES	YES
GCF_025961205.1_ASM2596120v1	Contig	Azospirillum fermentarium	92.25	5889749	29	84	YES	NO	YES	YES
GCF_028622115.1_ASM2862211v1	Complete Genome	Kutzneria chonburiensis	95.07	10411187	0	84	NO	NO	NO	NO
GCF_900094625.1_IMG-taxon_2615840624_annotated_assembly	Scaffold	Rhizobium aethiopicum	99.94	6557588	0	84	NO	NO	NO	NO
GCF_900112845.1_IMG-taxon_2667527403_annotated_assembly	Scaffold	Actinacidiphila alni	99.96	8270097	0	84	NO	NO	NO	NO
GCF_000145235.1_ASM14523v1	Complete Genome	Micromonospora aurantiaca ATCC 27029	99.3	7025559	0	83	NO	NO	NO	NO
GCF_000196675.2_ASM19667v2	Chromosome	Pseudonocardia dioxanivorans CB1190	98.23	7440794	0	83	NO	NO	NO	NO
GCF_000341125.1_SOAPdenovo_v1.06	Contig	Nocardiopsis lucentensis DSM 44048	90.15	6325274	0	83	NO	NO	NO	NO
GCF_000381025.1_ASM38102v1	Scaffold	Streptomyces sulphureus DSM 40104	99.62	7104952	0	83	NO	NO	NO	NO
GCF_000716625.1_ASM71662v1	Contig	Streptomyces bikiniensis	99.18	7391008	0	83	NO	NO	NO	NO
GCF_000721185.1_ASM72118v1	Contig	Streptomyces griseolus	99.53	7537539	0	83	NO	NO	NO	NO
GCF_000787775.1_ASM78777v1	Scaffold	Streptacidiphilus carbonis	97.73	8457280	0	83	NO	NO	NO	NO
GCF_000960975.1_ASM96097v1	Complete Genome	Martelella endophytica	95.97	4817335	0	83	NO	NO	NO	NO
GCF_000981895.1_ASM98189v1	Contig	Streptomyces odonnellii	98.36	8280224	0	83	NO	NO	NO	NO
GCF_001044425.1_ASM104442v1	Scaffold	Streptomyces roseus	99.06	7834742	0	83	NO	NO	NO	NO
GCF_003053745.1_ASM305374v1	Scaffold	Sphingomonas faeni	99.19	4383558	2	83	YES	YES	YES	YES
GCF_003123685.1_ASM312368v1	Contig	Nocardia aurea	98.1	9368495	0	83	NO	NO	NO	NO
GCF_003332305.1_ASM333230v1	Contig	Microvirga aerophila	74.83	6003377	0	83	YES	NO	YES	YES
GCF_003626545.1_ASM362654v1	Contig	Micromonospora musae	93.91	7058875	0	83	NO	NO	NO	NO
GCF_003634995.1_ASM363499v1	Contig	Saccharothrix variisporea	100	9408895	0	83	NO	NO	NO	NO
GCF_004306555.1_ASM430655v1	Scaffold	Rhizobium leguminosarum	99.82	7598116	0	83	YES	NO	YES	NO
GCF_004684805.1_ASM468480v1	Contig	Streptomyces palmae	98.67	7497959	0	83	NO	NO	NO	NO
GCF_007856155.1_ASM785615v1	Complete Genome	Streptomyces qinzhouensis	99.3	8146484	0	83	NO	NO	NO	NO
GCF_007994075.1_ASM799407v1	Contig	Pseudonocardia hierapolitana	96.63	8856958	0	83	NO	NO	NO	NO
GCF_011045075.1_ASM1104507v1	Contig	Streptomyces boncukensis	98.77	8270314	0	83	NO	NO	NO	NO
GCF_012034205.1_ASM1203420v1	Contig	Streptomyces composti	100	6517216	0	83	NO	NO	NO	NO
GCF_014196765.1_ASM1419676v1	Scaffold	Mycoplana azooxidifex	98.35	5889117	0	83	YES	NO	YES	YES
GCF_014649535.1_ASM1464953v1	Scaffold	Streptomyces gelaticus	99.83	7755498	0	83	NO	NO	NO	NO
GCF_014650335.1_ASM1465033v1	Scaffold	Streptomyces hiroshimensis	99.53	7757254	0	83	NO	NO	NO	NO
GCF_015169395.1_ASM1516939v1	Complete Genome	Humisphaera borealis	95.56	7189892	0	83	NO	NO	NO	NO
GCF_015690355.1_ASM1569035v1	Scaffold	Streptacidiphilus fuscans	97.92	8577691	0	83	NO	NO	NO	NO
GCF_017896165.1_ASM1789616v1	Contig	Microbispora oryzae	78.16	7464125	0	83	NO	NO	NO	NO
GCF_018305005.1_ASM1830500v1	Contig	Collimonas silvisoli	99.68	5656530	44	83	YES	NO	YES	YES
GCF_018362975.1_ASM1836297v1	Complete Genome	Nocardia tengchongensis	86.84	8006012	0	83	NO	NO	NO	NO
GCF_018437505.1_ASM1843750v1	Complete Genome	Spiractinospora alimapuensis	89.51	5864354	0	83	NO	NO	NO	NO
GCF_019038455.1_ASM1903845v1	Contig	Nocardia noduli	98.4	8929032	0	83	NO	NO	NO	NO
GCF_020026895.1_ASM2002689v1	Contig	Lysobacter selenitireducens	90.69	3110147	28	83	YES	YES	YES	YES
GCF_020404845.1_ASM2040484v1	Contig	Streptomyces hyderabadensis	99.87	8183068	0	83	NO	NO	NO	NO
GCF_020639365.1_ASM2063936v1	Scaffold	Streptomyces flavotricini	99.91	8859749	0	83	NO	NO	NO	NO
GCF_020866845.1_ASM2086684v1	Complete Genome	Sphingomonas radiodurans	99.64	3678193	8	83	YES	NO	YES	YES
GCF_024436035.1_ASM2443603v1	Contig	Streptomyces humicola	98.96	7069061	0	83	NO	NO	NO	NO
GCF_027706725.1_ASM2770672v1	Contig	Nocardiopsis endophytica	92.63	7259403	0	83	NO	NO	NO	NO
GCF_027922205.1_ASM2792220v1	Contig	Methylopila capsulata	95.42	4137354	0	83	YES	YES	YES	YES
GCF_028737255.1_ASM2873725v1	Contig	Actinomycetospora straminea	98.31	6285992	0	83	NO	NO	NO	NO
GCF_029953285.1_ASM2995328v1	Contig	Yinghuangia seranimata	94.6	9797445	0	83	NO	NO	NO	NO
GCF_900091505.1_IMG-taxon_2623620610_annotated_assembly	Chromosome	Micromonospora chokoriensis	96.13	6897819	0	83	NO	NO	NO	NO
GCF_900111005.1_IMG-taxon_2619619034_annotated_assembly	Scaffold	Lentzea albida	98.51	9441135	0	83	NO	NO	NO	NO
GCF_900231165.1_HDIA1	Complete Genome	Hartmannibacter diazotrophicus	99.78	5449775	10	83	YES	YES	YES	YES
GCF_900243065.1_PRJEB23962	Scaffold	Rickettsia fournieri	99.52	1447740	24	83	YES	NO	YES	YES
GCF_900699765.1_MSL71_genome	Scaffold	Desulfoluna butyratoxydans	98.94	6440645	0	83	NO	NO	YES	NO
GCF_000019945.1_ASM1994v1	Complete Genome	Methylorubrum populi BJ001	99.68	5848997	0	82	YES	NO	YES	YES
GCF_000422645.1_ASM42264v1	Scaffold	Ferrimonas futtsuensis DSM 18154	99.31	4296027	0	82	NO	NO	YES	NO
GCF_000719135.1_ASM71913v1	Contig	Streptomyces avicenniae	95.3	6480326	0	82	NO	NO	NO	NO
GCF_000804505.1_ASM80450v1	Contig	Rickettsia felis	86.16	1579101	17	82	YES	NO	YES	YES
GCF_001632805.1_ASM163280v1	Complete Genome	Mycobacteroides chelonae CCUG 47445	98.7	5029817	0	82	NO	NO	NO	NO
GCF_002082605.1_ASM208260v1	Complete Genome	Kitasatospora aureofaciens	96.97	7076402	0	82	NO	NO	NO	NO
GCF_003202285.1_ASM320228v1	Contig	Prauserella muralis	99.5	7467757	0	82	NO	NO	NO	NO
GCF_003432485.1_ASM343248v1	Contig	Actinomadura spongiicola	93.21	7711411	0	82	NO	NO	NO	NO
GCF_003939025.1_ASM393902v1	Contig	Rhizobium sophoriradicis	99.78	6665510	0	82	YES	NO	YES	YES
GCF_004331345.1_ASM433134v1	Contig	Kribbella soli	98.25	8785001	0	82	NO	NO	NO	NO
GCF_005871085.1_ASM587108v1	Scaffold	Xanthobacter autotrophicus	94.31	5013287	0	82	YES	NO	YES	YES
GCF_007829885.1_ASM782988v1	Contig	Streptomyces brevispora	100	7540224	0	82	NO	NO	NO	NO
GCF_007994225.1_ASM799422v1	Scaffold	Stackebrandtia albiflava	94.97	5549958	0	82	NO	NO	NO	NO
GCF_008923205.2_ASM892320v2	Scaffold	Actinomadura physcomitrii	94.92	9999585	0	82	NO	NO	NO	NO
GCF_009299385.1_ASM929938v1	Complete Genome	Streptomyces cinereoruber	99.62	7516652	0	82	NO	NO	NO	NO
GCF_009735685.1_ASM973568v1	Scaffold	Streptomyces lycii	98.82	7654960	0	82	NO	NO	NO	NO
GCF_009769385.1_ASM976938v1	Scaffold	Saccharothrix deserti	100	10832261	0	82	NO	NO	NO	NO
GCF_011766325.1_ASM1176632v1	Contig	Streptomyces pacificus	98.39	6714233	0	82	NO	NO	NO	NO
GCF_013285525.1_ASM1328552v1	Complete Genome	Agrobacterium pusense	99.74	5375961	0	82	NO	NO	NO	NO
GCF_014207705.1_ASM1420770v1	Contig	Sphaerisporangium rubeum	69.96	7504604	0	82	NO	NO	NO	NO
GCF_016862375.1_ASM1686237v1	Contig	Actinoplanes rishiriensis	91.54	10908275	0	82	NO	NO	NO	NO
GCF_016862835.1_ASM1686283v1	Contig	Longispora fulva	93.27	8618400	0	82	NO	NO	NO	NO
GCF_017876115.1_ASM1787611v1	Contig	Azospirillum picis	93.8	7015440	0	82	NO	NO	NO	NO
GCF_017876755.1_ASM1787675v1	Contig	Crossiella equi	99.5	9440186	0	82	NO	NO	NO	NO
GCF_018324255.1_ASM1832425v1	Complete Genome	Polymorphospora rubra	90.46	8365212	0	82	NO	NO	NO	NO
GCF_018860155.1_ASM1886015v1	Scaffold	Nocardia albiluteola	97.1	9588249	0	82	NO	NO	NO	NO
GCF_020859565.1_ASM2085956v1	Scaffold	Saccharothrix luteola	98.01	10305394	0	82	NO	NO	NO	NO
GCF_021483115.1_ASM2148311v1	Scaffold	Arthrobacter ramosus	98.89	5245857	0	82	NO	NO	NO	NO
GCF_021654135.1_ASM2165413v1	Scaffold	Amycolatopsis tucumanensis	99.06	9017186	0	82	NO	NO	NO	NO
GCF_023062595.1_ASM2306259v1	Scaffold	Arthrobacter rhizosphaerae	99.74	5022511	0	82	NO	NO	NO	NO
GCF_025821625.1_ASM2582162v1	Scaffold	Mycolicibacterium pyrenivorans	98.75	6688400	0	82	NO	NO	NO	NO
GCF_025961475.1_ASM2596147v1	Contig	Rhodobium gokarnense	86.36	5096651	0	82	YES	NO	YES	YES
GCF_027922165.1_ASM2792216v1	Scaffold	Brevundimonas intermedia	99.12	3589847	0	82	YES	NO	YES	YES
GCF_900111175.1_IMG-taxon_2616644847_annotated_assembly	Scaffold	Actinokineospora terrae	100	7588185	0	82	NO	NO	NO	NO
GCF_900111245.1_IMG-taxon_2675903055_annotated_assembly	Scaffold	Streptomyces qinglanensis	98.67	7175483	0	82	NO	NO	NO	NO
GCF_900269665.1_PRJEB24498	Scaffold	Nocardia suismassiliense	97.85	9465194	0	82	NO	NO	NO	NO
GCF_900452715.1_51342_H02	Contig	Legionella moravica	99.93	3825910	0	82	YES	YES	YES	YES
GCF_000024345.1_ASM2434v1	Complete Genome	Kribbella flavida DSM 17836	99.16	7579488	0	81	NO	NO	NO	NO
GCF_000058485.1_ASM5848v1	Complete Genome	Frankia alni ACN14a	98.22	7497934	0	81	NO	NO	NO	NO
GCF_000379525.1_ASM37952v1	Scaffold	Lamprocystis purpurea DSM 4197	99.58	6908745	0	81	YES	NO	YES	YES
GCF_000718025.1_ASM71802v1	Contig	Kitasatospora purpeofusca	97.39	9343474	0	81	NO	NO	NO	NO
GCF_000730165.1_ASM73016v2	Complete Genome	Nitrospirillum amazonense CBAmc	99.56	7382386	0	81	NO	NO	NO	NO
GCF_000948395.1_CpI1-S	Scaffold	Frankia torreyi	94.12	7624758	0	81	NO	NO	NO	NO
GCF_001618425.1_ASM161842v1	Contig	Nocardia fusca NBRC 14340	97.28	8036724	0	81	NO	NO	NO	NO
GCF_001660045.1_ASM166004v1	Complete Genome	Streptomyces parvulus	99.91	7766531	0	81	NO	NO	NO	NO
GCF_002154345.1_ASM215434v1	Scaffold	Streptomyces fimicarius	94.83	7819863	0	81	NO	NO	NO	NO
GCF_002270415.1_ASM227041v1	Contig	Mesorhizobium sophorae	98.56	8049106	0	81	NO	NO	NO	NO
GCF_002994635.1_ASM299463v1	Contig	Enhygromyxa salina	85.62	10602692	0	81	NO	NO	NO	NO
GCF_003236315.1_ASM323631v1	Contig	Micromonospora craterilacus	91.92	7306627	0	81	NO	NO	NO	NO
GCF_003236385.1_ASM323638v1	Contig	Spongiactinospora gelatinilytica	76.25	8049107	0	81	NO	NO	NO	NO
GCF_004339085.1_ASM433908v1	Scaffold	Thiogranum longum	94.84	2916906	0	81	NO	NO	YES	NO
GCF_004358165.1_ASM435816v1	Contig	Luteimonas terrae	85.11	3569262	4	81	YES	YES	YES	YES
GCF_006912135.1_ASM691213v1	Contig	Cryptosporangium phraense	95.8	8463372	0	81	NO	NO	NO	NO
GCF_008704855.1_ASM870485v1	Complete Genome	Streptomyces platensis	99.46	8501012	0	81	NO	NO	NO	NO
GCF_009497155.1_ASM949715v1	Scaffold	Glaciimonas soli	98.93	4266306	31	81	YES	NO	YES	YES
GCF_009708175.1_ASM970817v1	Contig	Nocardia aurantiaca	96.88	7376943	0	81	NO	NO	NO	NO
GCF_009720385.1_ASM972038v1	Scaffold	Catellatospora vulcania	95.47	8830450	0	81	NO	NO	NO	NO
GCF_011040385.1_ASM1104038v1	Contig	Falsiroseomonas algicola	98.48	6563846	0	81	NO	NO	NO	NO
GCF_011320225.1_ASM1132022v1	Scaffold	Phytoactinopolyspora limicola	98.57	6590001	0	81	NO	NO	NO	NO
GCF_011927785.1_ASM1192778v1	Contig	Micromonospora profundi	96.67	6933450	0	81	NO	NO	NO	NO
GCF_013087625.1_ASM1308762v1	Scaffold	Rhizobium changzhiense	98.18	6590079	0	81	YES	NO	YES	YES
GCF_014205765.1_ASM1420576v1	Scaffold	Nitrospirillum iridis	97.41	7088717	0	81	NO	NO	NO	NO
GCF_014645795.1_ASM1464579v1	Scaffold	Longimycelium tulufanense	98.26	6828786	0	81	NO	NO	NO	NO
GCF_014655595.1_ASM1465559v1	Scaffold	Streptomyces griseocarneus	100	7375626	0	81	NO	NO	NO	NO
GCF_014655855.1_ASM1465585v1	Scaffold	Streptomyces candidus	100	7307831	0	81	NO	NO	NO	NO
GCF_016632405.1_ASM1663240v1	Scaffold	Azospirillum aestuarii	93.26	7147505	0	81	NO	NO	NO	NO
GCF_016862555.1_ASM1686255v1	Contig	Asanoa siamensis	95.5	8781664	0	81	NO	NO	NO	NO
GCF_019456675.1_ASM1945667v1	Complete Genome	Mycolicibacterium pallens	99.14	6093551	0	81	NO	NO	NO	NO
GCF_021129305.1_ASM2112930v1	Contig	Kineosporia babensis	99.16	9399766	0	81	NO	NO	NO	NO
GCF_021183565.1_ASM2118356v1	Complete Genome	Nocardia yamanashiensis	97.03	8468804	0	81	NO	NO	NO	NO
GCF_022230925.1_ASM2223092v1	Contig	Micromonospora alfalfae	98.42	7558670	0	81	NO	NO	NO	NO
GCF_023218175.1_ASM2321817v1	Contig	Streptomyces lichenis	99.37	7121629	0	81	NO	NO	NO	NO
GCF_030268905.1_ASM3026890v1	Scaffold	Actinokineospora globicatena	100	7641567	0	81	NO	NO	NO	NO
GCF_900454465.1_50766_H01	Contig	Pannonibacter phragmitetus	98.84	4837487	0	81	YES	NO	YES	YES
GCF_900626215.1_PRJEB24607	Scaffold	Corynebacterium neomassiliense	99.41	3142062	0	81	NO	NO	NO	NO
GCF_000236565.1_ASM23656v2	Contig	Mesorhizobium alhagi CCNWXJ12-2	94.04	6968952	0	80	NO	NO	NO	NO
GCF_000263055.1_Rho1.0	Contig	Rickettsia honei RB	99.31	1268758	11	80	NO	NO	YES	NO
GCF_000718005.1_ASM71800v1	Contig	Actinoalloteichus caeruleus	99.5	6026369	0	80	NO	NO	NO	NO
GCF_000719095.1_ASM71909v1	Contig	Streptacidiphilus jeojiense	97.63	9156717	0	80	NO	NO	NO	NO
GCF_001046855.1_ASM104685v1	Scaffold	Nostocoides japonicum T1-X7	95.65	5162321	0	80	NO	NO	NO	NO
GCF_001278075.1_ASM127807v1	Complete Genome	Streptomyces pristinaespiralis	100	8532592	0	80	NO	NO	NO	NO
GCF_001552315.1_ASM155231v1	Contig	Mycolicibacterium chlorophenolicum JCM 7439 = NBRC 15527	99.89	7330216	0	80	NO	NO	NO	NO
GCF_001618865.1_ASM161886v1	Complete Genome	Luteitalea pratensis	96.48	7480314	0	80	NO	NO	NO	NO
GCF_003073115.1_ASM307311v1	Contig	Acuticoccus kandeliae	97.94	6478100	0	80	NO	NO	NO	NO
GCF_003205615.1_ASM320561v1	Scaffold	Micromonospora arborensis	96.34	7299236	0	80	NO	NO	NO	NO
GCF_003325375.1_ASM332537v1	Complete Genome	Streptomyces globosus	99.53	7535750	0	80	NO	NO	NO	NO
GCF_003429565.1_ASM342956v1	Scaffold	Streptomyces triticagri	98.99	7471434	0	80	NO	NO	NO	NO
GCF_004348985.1_ASM434898v1	Contig	Saccharopolyspora elongata	100	10298286	0	80	NO	NO	NO	NO
GCF_004363235.1_ASM436323v1	Scaffold	Dongia mobilis	99.12	4189767	0	80	YES	NO	YES	YES
GCF_004795975.1_ASM479597v1	Complete Genome	Wolbachia endosymbiont of Drosophila mauritiana	98.73	1273530	0	80	YES	NO	YES	YES
GCF_008085895.1_ASM808589v1	Contig	Actinomadura chibensis	96.49	9406515	0	80	NO	NO	NO	NO
GCF_009720365.1_ASM972036v1	Scaffold	Catellatospora paridis	96.3	8972725	0	80	NO	NO	NO	NO
GCF_010550695.1_ASM1055069v1	Scaffold	Phytoactinopolyspora alkaliphila	78.92	5506198	0	80	NO	NO	NO	NO
GCF_014195675.1_ASM1419567v1	Contig	Erythrobacter ramosus	90.46	3342622	0	80	YES	YES	YES	YES
GCF_014201555.1_ASM1420155v1	Contig	Oleiagrimonas soli	99.39	3373182	0	80	YES	YES	YES	YES
GCF_014649875.1_ASM1464987v1	Scaffold	Streptomyces rubiginosohelvolus	99.53	7548572	0	80	NO	NO	NO	NO
GCF_014650395.1_ASM1465039v1	Scaffold	Streptomyces pluricolorescens	94.82	7332794	0	80	NO	NO	NO	NO
GCF_015277775.1_ASM1527777v1	Complete Genome	Paludibaculum fermentans	96.42	9532094	0	80	NO	NO	NO	NO
GCF_017349075.1_ASM1734907v1	Contig	Streptomyces triculaminicus	99.08	7560338	0	80	NO	NO	NO	NO
GCF_018324205.1_ASM1832420v1	Complete Genome	Actinoplanes ianthinogenes	96.51	9897806	0	80	NO	NO	NO	NO
GCF_020907985.1_ASM2090798v1	Contig	Kitasatospora humi	98.11	8094094	0	80	NO	NO	NO	NO
GCF_024172095.1_ASM2417209v1	Contig	Kitasatospora paracochleata	98.24	8643301	0	80	NO	NO	NO	NO
GCF_024172125.1_ASM2417212v1	Contig	Actinomadura rupiterrae	96.59	10242436	0	80	NO	NO	NO	NO
GCF_027947595.1_ASM2794759v1	Complete Genome	Streptomyces lienomycini	99.91	7863969	0	80	NO	NO	NO	NO
GCF_900107455.1_IMG-taxon_2690315652_annotated_assembly	Contig	Asanoa ishikariensis	95.73	9085759	0	80	NO	NO	NO	NO
GCF_900114535.1_IMG-taxon_2654588108_annotated_assembly	Scaffold	Methylobacterium pseudosasicola	99.24	6845277	0	80	YES	YES	YES	YES
GCF_900142985.1_IMG-taxon_2695420919_annotated_assembly	Chromosome	Bradyrhizobium erythrophlei	96.26	7525217	0	80	YES	NO	YES	YES
GCF_900188085.1_IMG-taxon_2681813547_annotated_assembly	Contig	Granulicella rosea	86.9	5293785	0	80	YES	NO	YES	YES
GCF_000022005.1_ASM2200v1	Complete Genome	Caulobacter vibrioides NA1000	99.56	4042929	0	79	YES	NO	YES	YES
GCF_000024545.1_ASM2454v1	Complete Genome	Stackebrandtia nassauensis DSM 44728	99.12	6841557	0	79	NO	NO	NO	NO
GCF_000226955.1_ASM22695v2	Contig	Sphingomonas elodea ATCC 31461	99.12	4124388	3	79	YES	NO	YES	YES
GCF_000255355.1_ASM25535v1	Chromosome	Rickettsia helvetica C9P9	94.63	1417115	8	79	YES	NO	YES	YES
GCF_000374445.1_ASM37444v1	Scaffold	Actinokineospora enzanensis DSM 44649	99	8119858	0	79	NO	NO	NO	NO
GCF_000426505.1_ASM42650v1	Scaffold	Nisaea denitrificans DSM 18348	99.06	4626718	1	79	NO	NO	NO	NO
GCF_000732195.1_ASM73219v1	Contig	Neorhizobium vignae	100	6343049	0	79	NO	NO	NO	NO
GCF_000744815.1_ASM74481v1	Contig	Phaeacidiphilus oryzae TH49	94.99	7806543	0	79	NO	NO	NO	NO
GCF_000974765.1_ASM97476v1	Contig	Sphingomonas changbaiensis NBRC 104936	99.37	3217375	10	79	YES	NO	YES	YES
GCF_001043955.1_ASM104395v1	Contig	Methylobacterium tarhaniae	94.51	6743422	0	79	NO	NO	NO	NO
GCF_001050155.1_ASM105015v1	Contig	Nitratireductor soli	95.34	5125657	0	79	YES	NO	YES	YES
GCF_001484625.1_ASM148462v1	Contig	Streptomyces kanasensis	96.47	7026257	0	79	NO	NO	NO	NO
GCF_002101675.1_ASM210167v1	Contig	Mycobacterium gordonae	99.29	7601632	0	79	NO	NO	NO	NO
GCF_002937115.1_ASM293711v1	Scaffold	Rhodopila globiformis	98.72	7248147	0	79	YES	NO	YES	YES
GCF_003626535.1_ASM362653v1	Contig	Streptomyces hoynatensis	94.35	7260715	0	79	NO	NO	NO	NO
GCF_003855255.1_ASM385525v1	Chromosome	Mycolicibacterium nivoides	99.83	6905961	0	79	NO	NO	NO	NO
GCF_004514435.1_ASM451443v1	Contig	Shinella sumterensis	99.26	5355822	0	79	NO	NO	NO	NO
GCF_004794175.1_ASM479417v1	Contig	Streptomyces rhizosphaericola	99.34	7213159	0	79	NO	NO	NO	NO
GCF_004912145.1_ASM491214v1	Contig	Rhizobium rhizophilum	99.65	5248183	0	79	NO	NO	NO	NO
GCF_007845675.1_ASM784567v1	Scaffold	Lentzea tibetensis	97.76	9370857	0	79	NO	NO	NO	NO
GCF_008638355.1_ASM863835v1	Scaffold	Nocardiopsis deserti	98.51	7251616	0	79	NO	NO	NO	NO
GCF_008704425.1_ASM870442v1	Complete Genome	Streptomyces fradiae ATCC 10745 = DSM 40063	99.34	6725579	0	79	NO	NO	NO	NO
GCF_009177065.1_ASM917706v1	Contig	Tautonia marina	98.88	7069583	0	79	NO	NO	NO	NO
GCF_009604425.1_ASM960442v1	Contig	Nocardia aurantia	98.05	8617881	0	79	NO	NO	NO	NO
GCF_011058215.1_ASM1105821v1	Contig	Devosia aurantiaca	74.9	3692966	0	79	YES	NO	YES	YES
GCF_014217565.1_ASM1421756v1	Complete Genome	Kribbella qitaiheensis	87.91	8156807	0	79	NO	NO	NO	NO
GCF_014648475.1_ASM1464847v1	Scaffold	Lentzea flava	98.41	9721257	0	79	NO	NO	NO	NO
GCF_014650655.1_ASM1465065v1	Scaffold	Streptomyces anandii JCM 4720	98.75	7932225	0	79	NO	NO	NO	NO
GCF_014654785.1_ASM1465478v1	Contig	Streptomyces mashuensis	99.53	7237780	0	79	NO	NO	NO	NO
GCF_015278225.1_ASM1527822v1	Scaffold	Microbacterium aquimaris	98.75	5899768	0	79	NO	NO	YES	NO
GCF_015751765.1_ASM1575176v1	Contig	Micromonospora ureilytica	96.96	7096270	0	79	NO	NO	NO	NO
GCF_016820445.1_ASM1682044v1	Contig	Sphingomonas beigongshangi	99.19	3621233	13	79	YES	YES	YES	YES
GCF_016862855.1_ASM1686285v1	Contig	Phytomonospora endophytica	91.33	8302183	0	79	NO	NO	NO	NO
GCF_016919645.1_ASM1691964v1	Chromosome	Mycolicibacterium austroafricanum	100	6287627	0	79	NO	NO	NO	NO
GCF_017876315.1_ASM1787631v1	Contig	Pseudonocardia parietis	95.19	8125468	0	79	NO	NO	NO	NO
GCF_019890725.1_ASM1989072v1	Contig	Streptomyces acidipaludis	98.55	8482086	0	79	NO	NO	NO	NO
GCF_020328095.1_ASM2032809v1	Contig	Streptomyces sichuanensis	100	6953971	0	79	NO	NO	NO	NO
GCF_020831365.1_ASM2083136v1	Scaffold	Massilia agrisoli	85.4	4677454	23	79	NO	NO	NO	NO
GCF_024158035.1_ASM2415803v1	Contig	Dyella lutea	97.03	4398720	16	79	YES	YES	YES	YES
GCF_024172085.1_ASM2417208v1	Contig	Hamadaea flava	94.03	8864410	0	79	NO	NO	NO	NO
GCF_024436055.1_ASM2443605v1	Contig	Streptantibioticus rubrisoli	98.48	7264851	0	79	NO	NO	NO	NO
GCF_025823185.1_ASM2582318v1	Scaffold	Mycobacterium yunnanensis	99.47	6452568	0	79	NO	NO	NO	NO
GCF_900099985.1_IMG-taxon_2634166206_annotated_assembly	Contig	Thermostaphylospora chromogena	88.06	5988017	0	79	NO	NO	NO	NO
GCF_900104485.1_IMG-taxon_2597490370_annotated_assembly	Contig	Bauldia litoralis	99.18	5094548	0	79	YES	NO	YES	YES
GCF_000007025.1_ASM702v1	Complete Genome	Rickettsia conorii str. Malish 7	99.86	1268755	16	78	NO	NO	YES	NO
GCF_000022085.1_ASM2208v1	Complete Genome	Methylobacterium nodulans ORS 2060	98.98	8839022	0	78	NO	NO	YES	NO
GCF_000284075.1_ASM28407v1	Complete Genome	Rickettsia rhipicephali str. 3-7-female6-CWPP	99.81	1305467	13	78	YES	NO	YES	YES
GCF_000308655.1_ASM30865v1	Contig	Nocardia niigatensis NBRC 100131	96.75	8224214	0	78	NO	NO	NO	NO
GCF_000513295.1_MGMSRv2	Complete Genome	Magnetospirillum gryphiswaldense MSR-1 v2	93.72	4365796	6	78	NO	NO	YES	NO
GCF_000519205.1_ASM51920v1	Scaffold	Amycolatopsis taiwanensis DSM 45107	98.42	8777509	0	78	NO	NO	NO	NO
GCF_000717405.1_ASM71740v1	Contig	Nocardia carnea	97.01	7503786	0	78	NO	NO	NO	NO
GCF_001050535.1_ASM105053v1	Scaffold	Nostocoides australiense Ben110	92.15	4264973	0	78	NO	NO	NO	NO
GCF_001584205.1_ASM158420v1	Complete Genome	Collimonas arenae	95.49	4709377	24	78	YES	NO	YES	YES
GCF_001642695.1_ASM164269v2	Scaffold	Streptomyces chilikensis	97.4	7121774	0	78	NO	NO	NO	NO
GCF_001751245.1_ASM175124v1	Scaffold	Streptomyces oceani	97.25	6311054	0	78	NO	NO	NO	NO
GCF_001751365.1_ASM175136v1	Scaffold	Streptomyces abyssalis	99.09	6610598	0	78	NO	NO	NO	NO
GCF_002257665.1_ASM225766v1	Scaffold	Rubricoccus marinus	97.62	4430441	21	78	YES	YES	YES	YES
GCF_003097515.1_ASM309751v1	Complete Genome	Streptomyces tirandamycinicus	99.15	7289495	0	78	NO	NO	NO	NO
GCF_003112515.1_ASM311251v1	Contig	Streptomyces fragilis	98.58	6847990	0	78	NO	NO	NO	NO
GCF_003122365.1_ASM312236v1	Complete Genome	Streptomyces spongiicola	99.53	7180417	0	78	NO	NO	NO	NO
GCF_003176735.1_ASM317673v1	Contig	Micromonospora globispora	93.4	6579334	0	78	NO	NO	NO	NO
GCF_004331485.1_ASM433148v1	Contig	Kribbella capetownensis	98.32	8831527	0	78	NO	NO	NO	NO
GCF_005233875.1_ASM523387v1	Scaffold	Kribbella jiaozuonensis	97.07	8659701	0	78	NO	NO	NO	NO
GCF_009601025.1_ASM960102v1	Contig	Roseospira navarrensis	96.36	4430246	0	78	NO	NO	NO	NO
GCF_009739905.1_ASM973990v1	Complete Genome	Streptomyces ficellus	99.81	7078240	0	78	NO	NO	NO	NO
GCF_010500835.1_ASM1050083v1	Scaffold	Aurantimonas aggregata	90.75	4861770	0	78	NO	NO	YES	NO
GCF_010974945.1_ASM1097494v1	Contig	Noviherbaspirillum galbum	99.87	6117206	3	78	NO	NO	NO	NO
GCF_013410645.1_ASM1341064v1	Contig	Micromonospora jinlongensis	86.23	6825366	0	78	NO	NO	NO	NO
GCF_014198105.1_ASM1419810v1	Scaffold	Rhizobium cellulosilyticum	97.15	5760694	0	78	YES	NO	YES	YES
GCF_014203805.1_ASM1420380v1	Contig	Lipingzhangella halophila	93.88	6930281	0	78	NO	NO	NO	NO
GCF_014205135.1_ASM1420513v1	Contig	Kribbella italica	97.73	8885108	0	78	NO	NO	NO	NO
GCF_014648075.1_ASM1464807v1	Scaffold	Streptomyces ruber	99.91	7896808	0	78	NO	NO	NO	NO
GCF_014651035.1_ASM1465103v1	Scaffold	Streptomyces lomondensis	100	8783439	0	78	NO	NO	NO	NO
GCF_014653695.1_ASM1465369v1	Scaffold	Lentzea cavernae	98.01	9738650	0	78	NO	NO	NO	NO
GCF_014779715.1_ASM1477971v1	Contig	Streptomyces chumphonensis	98.01	5823549	0	78	NO	NO	NO	NO
GCF_016775475.1_ASM1677547v1	Scaffold	Belnapia mucosa	99.49	6440162	0	78	NO	NO	NO	NO
GCF_016803985.1_ASM1680398v1	Complete Genome	Streptomyces koyangensis	99.08	7001532	0	78	NO	NO	NO	NO
GCF_016865425.1_ASM1686542v1	Complete Genome	Actinocatenispora thailandica	85.62	7426695	0	78	NO	NO	NO	NO
GCF_017357285.1_ASM1735728v1	Complete Genome	Rhizobium ruizarguesonis	99.94	7811507	0	78	NO	NO	NO	NO
GCF_017875645.1_ASM1787564v1	Contig	Nocardia goodfellowii	98.11	7982434	0	78	NO	NO	NO	NO
GCF_022229015.1_ASM2222901v1	Contig	Micromonospora foliorum	92.42	6846315	0	78	NO	NO	NO	NO
GCF_022524345.1_ASM2252434v1	Contig	Streptomyces marispadix	97.42	6695159	0	78	NO	NO	NO	NO
GCF_023347585.1_ASM2334758v1	Contig	Brenneria tiliae	98.35	5252950	2	78	YES	NO	YES	YES
GCF_024346875.1_ASM2434687v1	Complete Genome	Vibrio gallicus	92.03	3518157	4	78	YES	NO	YES	YES
GCF_025200715.1_ASM2520071v1	Complete Genome	Rhizobium sullae	99.94	7595929	0	78	NO	NO	NO	NO
GCF_029525575.1_ASM2952557v1	Contig	Cohnella rhizosphaerae	76.46	8497463	0	78	NO	NO	NO	NO
GCF_900091575.1_IMG-taxon_2622736537_annotated_assembly	Scaffold	Micromonospora saelicesensis	98.22	7103993	0	78	NO	NO	NO	NO
GCF_900110435.1_IMG-taxon_2671180228_annotated_assembly	Scaffold	Rhodopseudomonas pseudopalustris	99.25	5272456	0	78	YES	NO	YES	YES
GCF_900110735.1_IMG-taxon_2663762755_annotated_assembly	Scaffold	Streptomyces radiopugnans	98.03	6067124	0	78	NO	NO	NO	NO
GCF_900111885.1_IMG-taxon_2667527405_annotated_assembly	Scaffold	Amycolatopsis marina	98.02	7020699	0	78	NO	NO	NO	NO
GCF_900143515.1_IMG-taxon_2630968262_annotated_assembly	Contig	Micromonospora cremea	95.3	7759667	0	78	NO	NO	NO	NO
GCF_900197875.1_FRACA_ARgP5	Contig	Frankia canadensis	98.45	7673585	0	78	NO	NO	NO	NO
GCF_000716875.1_ASM71687v1	Contig	Streptomyces novaecaesareae	97.61	7427993	0	77	NO	NO	NO	NO
GCF_000718305.1_ASM71830v1	Contig	Streptomyces niger	99.62	8485418	0	77	NO	NO	NO	NO
GCF_000718985.1_ASM71898v1	Contig	Streptomyces megasporus	97.7	5850061	0	77	NO	NO	NO	NO
GCF_001921215.1_ASM192121v1	Contig	Actinophytocola xinjiangensis	99.15	9535536	0	77	NO	NO	NO	NO
GCF_002504085.1_ASM250408v1	Complete Genome	Sphingobium yanoikuyae	96.2	5532633	5	77	YES	YES	YES	YES
GCF_003236295.1_ASM323629v1	Contig	Jiangella anatolica	98.67	7005973	0	77	NO	NO	NO	NO
GCF_003264475.1_ASM326447v1	Contig	Micromonospora noduli	98.6	7230291	0	77	NO	NO	NO	NO
GCF_003626655.1_ASM362665v1	Contig	Micromonospora costi	95.17	7182425	0	77	NO	NO	NO	NO
GCF_003634705.1_ASM363470v1	Scaffold	Actinomadura pelletieri DSM 43383	93.23	7528180	0	77	NO	NO	NO	NO
GCF_003675325.1_ASM367532v1	Complete Genome	Streptomyces dangxiongensis	96.19	8157885	0	77	NO	NO	NO	NO
GCF_004564275.1_ASM456427v1	Contig	Sphingomonas parva	99.25	4487171	4	77	YES	NO	YES	YES
GCF_007004135.1_ASM700413v1	Contig	Rhizobium straminoryzae	95.39	5549903	0	77	YES	NO	YES	YES
GCF_007989085.1_ASM798908v1	Contig	Pseudonocardia sulfidoxydans NBRC 16205	97.17	6576285	0	77	NO	NO	NO	NO
GCF_008369935.1_ASM836993v1	Scaffold	Paraburkholderia panacisoli	99.94	10914015	0	77	NO	NO	NO	NO
GCF_009709575.1_ASM970957v1	Contig	Streptomyces taklimakanensis	98.67	6136714	0	77	NO	NO	NO	NO
GCF_009733595.1_ASM973359v1	Scaffold	Actinomadura litoris	93.68	9160916	0	77	NO	NO	NO	NO
GCF_010122465.1_ASM1012246v1	Scaffold	Phytoactinopolyspora mesophila	78.87	6512012	0	77	NO	NO	NO	NO
GCF_011516835.1_ASM1151683v1	Contig	Acetobacter musti	94.69	4713408	0	77	NO	NO	NO	NO
GCF_013389765.1_ASM1338976v1	Complete Genome	Micromonospora carbonacea	97.21	7528335	0	77	NO	NO	NO	NO
GCF_014054885.1_ASM1405488v1	Complete Genome	Neisseria wadsworthii	99.18	2501534	0	77	YES	YES	YES	YES
GCF_014137975.1_ASM1413797v1	Contig	Halosaccharopolyspora lacisalsi	95.77	5373782	0	77	NO	NO	NO	NO
GCF_014137995.1_ASM1413799v1	Contig	Promicromonospora sukumoe	93.93	6512079	0	77	NO	NO	YES	NO
GCF_014200295.1_ASM1420029v1	Scaffold	Rhizobium giardinii	99.28	6569494	0	77	NO	NO	NO	NO
GCF_014645535.1_ASM1464553v1	Contig	Silvimonas iriomotensis	99.03	4588753	12	77	NO	NO	YES	NO
GCF_014649755.1_ASM1464975v1	Scaffold	Streptomyces litmocidini	100	7974192	0	77	NO	NO	NO	NO
GCF_015689335.1_ASM1568933v1	Complete Genome	Massilia antarctica	87.29	7432405	27	77	YES	NO	YES	YES
GCF_016901035.1_ASM1690103v1	Scaffold	Streptomyces durocortorensis	96.8	7959868	0	77	NO	NO	NO	NO
GCF_016907955.1_ASM1690795v1	Contig	Lentzea nigeriaca	99.5	9332327	0	77	NO	NO	NO	NO
GCF_019890635.1_ASM1989063v1	Contig	Streptomyces sennicomposti	98.48	7351330	0	77	NO	NO	NO	NO
GCF_020024005.1_ASM2002400v1	Scaffold	Streptomyces purpurogeneiscleroticus	98.86	7743394	0	77	NO	NO	NO	NO
GCF_021216675.1_ASM2121667v1	Complete Genome	Streptomyces gobiensis	99.24	5691859	0	77	NO	NO	NO	NO
GCF_022230955.1_ASM2223095v1	Contig	Micromonospora cabrerizensis	97.99	6919987	0	77	NO	NO	NO	NO
GCF_023155275.1_ASM2315527v1	Contig	Streptomyces rhizoryzae	99.16	7783213	0	77	NO	NO	NO	NO
GCF_025403355.1_ASM2540335v1	Contig	Frankia gtarii	98.86	7713009	0	77	NO	NO	NO	NO
GCF_028807635.1_ASM2880763v1	Contig	Streptomyces spiramyceticus	99.85	7079233	0	77	NO	NO	NO	NO
GCF_028994805.1_ASM2899480v1	Scaffold	Promicromonospora iranensis	89.33	5840325	0	77	NO	NO	NO	NO
GCF_900091425.1_IMG-taxon_2617270872_annotated_assembly	Chromosome	Micromonospora krabiensis	96.21	7074838	0	77	NO	NO	NO	NO
GCF_900105925.1_IMG-taxon_2639762615_annotated_assembly	Chromosome	Jiangella alkaliphila	99.51	7716600	0	77	NO	NO	NO	NO
GCF_900107045.1_IMG-taxon_2675903050_annotated_assembly	Scaffold	Amycolatopsis xylanica	98.57	9406090	0	77	NO	NO	NO	NO
GCF_000013885.1_ASM1388v1	Complete Genome	Nitrobacter hamburgensis X14	99.01	5011522	0	76	YES	NO	YES	YES
GCF_000019725.1_ASM1972v1	Complete Genome	Methylobacterium radiotolerans JCM 2831	100	6899110	0	76	NO	NO	NO	NO
GCF_000238915.1_ASM23891v2	Contig	Arthrobacter globiformis NBRC 12137	99.34	4954410	0	76	NO	NO	NO	NO
GCF_000308835.1_ASM30883v1	Contig	Nocardia vinacea NBRC 16497	97.88	10155283	0	76	NO	NO	NO	NO
GCF_000332355.1_ASM33235v1	Scaffold	Baaleninema simplex PCC 7105	93.49	6152351	0	76	NO	NO	YES	NO
GCF_000380165.1_ASM38016v1	Scaffold	Wenjunlia vitaminophila DSM 41686	96.21	6429887	0	76	NO	NO	NO	NO
GCF_000420645.1_ASM42064v1	Contig	Nevskia ramosa DSM 11499	99.15	4515285	31	76	YES	NO	YES	YES
GCF_001006805.1_Microvirga_massiliensis_JC119	Scaffold	Microvirga massiliensis	77.36	9172134	0	76	YES	YES	YES	YES
GCF_001751255.1_ASM175125v1	Scaffold	Streptomyces nanshensis	99.24	7724355	0	76	NO	NO	NO	NO
GCF_001906585.1_ASM190658v1	Scaffold	Streptomyces kebangsaanensis	96.47	8244886	0	76	NO	NO	NO	NO
GCF_001942625.1_ASM194262v1	Contig	Mycobacterium syngnathidarum	99.44	6344489	0	76	NO	NO	NO	NO
GCF_002234535.1_ASM223453v1	Complete Genome	Actinoalloteichus hoggarensis	97.99	6606717	0	76	NO	NO	NO	NO
GCF_002262875.1_ASM226287v1	Contig	Amycolatopsis antarctica	96.63	6342753	0	76	NO	NO	NO	NO
GCF_002356335.1_ASM235633v1	Complete Genome	Mycobacterium stephanolepidis	98.86	4994485	0	76	NO	NO	NO	NO
GCF_003258945.1_ASM325894v1	Contig	Roseicella frigidaeris	99.34	5823079	0	76	NO	NO	NO	NO
GCF_003363155.1_ASM336315v1	Scaffold	Dyella monticola	98.83	4940170	13	76	YES	NO	YES	YES
GCF_003568845.1_ASM356884v1	Complete Genome	Indioceanicola profundi	100	5374982	0	76	NO	NO	NO	NO
GCF_003663795.1_ASM366379v1	Scaffold	Actinokineospora cianjurensis	100	7615874	0	76	NO	NO	NO	NO
GCF_003945385.1_ASM394538v1	Complete Genome	Pseudonocardia autotrophica	92.19	7535285	0	76	NO	NO	NO	NO
GCF_004458765.1_ASM445876v1	Contig	Microvirga pakistanensis	72.62	5764046	1	76	NO	NO	NO	NO
GCF_005503535.1_ASM550353v1	Contig	Mesorhizobium comanense	99.21	7363057	0	76	NO	NO	NO	NO
GCF_005862305.2_ASM586230v2	Complete Genome	Rhizobium indicum	99.65	7533049	0	76	NO	NO	NO	NO
GCF_005981925.1_ASM598192v1	Contig	Streptomyces albidochromogenes	98.74	7265310	0	76	NO	NO	NO	NO
GCF_007751035.1_ASM775103v1	Complete Genome	Lignipirellula cremea	99.28	9565229	0	76	NO	NO	YES	NO
GCF_007859635.1_ASM785963v1	Complete Genome	Sphingomonas panacisoli	95.64	3403025	0	76	YES	NO	YES	YES
GCF_009674535.1_ASM967453v1	Contig	Duganella guangzhouensis	98.07	7552663	4	76	NO	NO	NO	NO
GCF_009746585.1_ASM974658v1	Contig	Novosphingobium aquimarinum	94.62	4377191	14	76	YES	YES	YES	YES
GCF_012034935.1_ASM1203493v1	Contig	Streptomyces zingiberis	97.4	6491253	0	76	NO	NO	NO	NO
GCF_014201195.1_ASM1420119v1	Contig	Nocardiopsis mwathae	77.72	5936987	0	76	NO	NO	NO	NO
GCF_014645755.1_ASM1464575v1	Scaffold	Modestobacter marinus	96.63	5109904	0	76	NO	NO	NO	NO
GCF_018128325.1_ASM1812832v1	Complete Genome	Arachnia rubra	95.15	3316958	0	76	NO	NO	NO	NO
GCF_022179245.1_ASM2217924v1	Contig	Methylobacterium gregans	97.84	5744513	0	76	NO	NO	NO	NO
GCF_022230935.1_ASM2223093v1	Contig	Micromonospora hortensis	96.57	6947278	0	76	NO	NO	NO	NO
GCF_022647665.1_ASM2264766v1	Complete Genome	Streptomyces formicae	98.71	8205064	0	76	NO	NO	NO	NO
GCF_024171785.1_ASM2417178v1	Scaffold	Goodfellowiella coeruleoviolacea	99.78	8779662	0	76	NO	NO	NO	NO
GCF_026337845.1_ASM2633784v1	Scaffold	Paraliomyxa miuraensis	87.37	11848290	0	76	NO	NO	NO	NO
GCF_900114215.1_IMG-taxon_2654587880_annotated_assembly	Scaffold	Streptomyces pini	98.14	6338888	0	76	NO	NO	NO	NO
GCF_900129375.1_IMG-taxon_2695420942_annotated_assembly	Contig	Streptoalloteichus hindustanus	98.59	7279383	0	76	NO	NO	NO	NO
GCF_900218025.1_IMG-taxon_2724679791_annotated_assembly	Contig	Quadrisphaera granulorum	98.88	4884413	0	76	NO	NO	NO	NO
GCF_947250475.1_ilApoBetu1.Wolbachia_sp_1.1	Complete Genome	Wolbachia endosymbiont (group B) of Apotomis betuletana	99.09	1635810	0	76	YES	NO	YES	YES
GCF_947250615.1_ilRhoNaev1.Wolbachia_sp_1.1	Complete Genome	Wolbachia endosymbiont (group B) of Rhopobota naevana	99.09	1771989	0	76	YES	NO	YES	YES
GCF_000378845.1_ASM37884v1	Scaffold	Salinispora pacifica DSM 45544	99.51	5464752	0	75	NO	NO	NO	NO
GCF_000384115.1_ASM38411v1	Scaffold	Sporichthya polymorpha DSM 43042	99.83	5500153	0	75	NO	NO	NO	NO
GCF_000514815.1_ASM51481v1	Scaffold	Salinispora fenicalii	98.4	5234686	0	75	NO	NO	NO	NO
GCF_000718015.1_ASM71801v1	Contig	Streptomyces catenulae	100	7046907	0	75	NO	NO	NO	NO
GCF_000722875.1_Schl_MUMv1	Contig	Sphingobium chlorophenolicum	99.18	4796122	15	75	YES	YES	YES	YES
GCF_000757795.1_ASM75779v1	Complete Genome	Methylobacterium oryzae CBMB20	99.75	6286629	0	75	NO	NO	NO	NO
GCF_000876225.1_ASM87622v1	Contig	Micromonospora haikouensis	96.21	7626891	0	75	NO	NO	NO	NO
GCF_001043915.1_ASM104391v1	Contig	Methylobacterium aquaticum	94.61	7425331	0	75	NO	NO	NO	NO
GCF_001618175.1_ASM161817v1	Contig	Oceanibaculum pacificum	92.14	3891434	0	75	YES	NO	YES	YES
GCF_001922385.1_ASM192238v1	Complete Genome	Sphingomonas koreensis	99.15	4819238	3	75	YES	NO	YES	YES
GCF_003014735.1_ASM301473v1	Contig	Saccharothrix carnea	100	8918169	0	75	NO	NO	NO	NO
GCF_003129465.1_ASM312946v1	Contig	Sphingosinicella humi	99.14	3026360	13	75	YES	NO	YES	YES
GCF_004217135.1_ASM421713v1	Contig	Micromonospora violae	97.42	7139733	0	75	NO	NO	NO	NO
GCF_004217185.1_ASM421718v1	Contig	Pseudonocardia sediminis	94.53	6612042	0	75	NO	NO	NO	NO
GCF_004348725.1_ASM434872v1	Contig	Kribbella turkmenica	97.24	7447142	0	75	NO	NO	NO	NO
GCF_004919685.1_ASM491968v1	Scaffold	Mesorhizobium norvegicum	98.99	8273529	0	75	YES	NO	YES	YES
GCF_006334525.1_ASM633452v1	Contig	Wolbachia endosymbiont of Leptopilina clavipes	99.09	1150755	0	75	YES	NO	YES	YES
GCF_006334995.2_ASM633499v2	Contig	Streptomyces mimosae	95.77	7198341	0	75	NO	NO	NO	NO
GCF_007746075.1_ASM774607v1	Chromosome	Lacipirellula limnantheis	97.36	6830976	0	75	NO	NO	NO	NO
GCF_008360935.1_ASM836093v1	Scaffold	Siccirubricoccus phaeus	98.71	6551407	0	75	NO	NO	NO	NO
GCF_008801925.2_ASM880192v2	Complete Genome	Cupriavidus basilensis	96.65	8942610	0	75	NO	NO	NO	NO
GCF_009002475.1_ASM900247v1	Complete Genome	Candidatus Uabimicrobium amorphum	68.68	9503417	0	75	NO	NO	NO	NO
GCF_009600895.1_ASM960089v1	Scaffold	Streptomyces katsurahamanus	98.86	7243826	0	75	NO	NO	NO	NO
GCF_010560025.1_ASM1056002v1	Contig	Verrucosispora sioxanthis	87.32	6367494	0	75	NO	NO	NO	NO
GCF_013087605.1_ASM1308760v1	Scaffold	Rhizobium indigoferae	99.94	7498874	0	75	NO	NO	YES	NO
GCF_014191725.1_ASM1419172v1	Scaffold	Microbulbifer rhizosphaerae	97.47	5346738	2	75	NO	NO	YES	NO
GCF_014203095.1_ASM1420309v1	Scaffold	Prosthecobacter vanneervenii	97.9	6662711	0	75	NO	NO	YES	NO
GCF_014204975.1_ASM1420497v1	Contig	Jiangella mangrovi	82.98	7164547	0	75	NO	NO	NO	NO
GCF_014652855.1_ASM1465285v1	Scaffold	Novosphingobium pokkalii	96.46	4674965	1	75	YES	NO	YES	YES
GCF_016862395.1_ASM1686239v1	Contig	Actinoplanes siamensis	91.96	8222618	0	75	NO	NO	NO	NO
GCF_018316655.1_ASM1831665v1	Complete Genome	Nocardiopsis changdeensis	97.38	7395646	0	75	NO	NO	NO	NO
GCF_019778565.1_ASM1977856v1	Scaffold	Rhizobium laguerreae	99.8	7356999	0	75	NO	NO	YES	NO
GCF_023242945.1_ASM2324294v1	Scaffold	Frankia umida	97.37	6429399	0	75	NO	NO	NO	NO
GCF_025950235.1_ASM2595023v1	Contig	Luteolibacter arcticus	98.49	7486770	0	75	NO	NO	NO	NO
GCF_026011795.1_ASM2601179v1	Contig	Arthrobacter mangrovi	99.21	4426898	0	75	NO	NO	NO	NO
GCF_027498475.1_ASM2749847v1	Contig	Agrobacterium salinitolerans	100	5102558	0	75	NO	NO	NO	NO
GCF_027925385.1_ASM2792538v1	Complete Genome	Methylocystis iwaonis	90.52	4483149	3	75	YES	YES	YES	YES
GCF_900089605.1_IMG-taxon_2617270834_annotated_assembly	Chromosome	Micromonospora narathiwatensis	93.73	6612057	0	75	NO	NO	NO	NO
GCF_900090265.1_IMG-taxon_2623620551_annotated_assembly	Chromosome	Micromonospora rifamycinica	95.4	7011369	0	75	NO	NO	NO	NO
GCF_900091585.1_IMG-taxon_2619619644_annotated_assembly	Contig	Micromonospora nigra	93.66	6363764	0	75	NO	NO	NO	NO
GCF_900103985.1_IMG-taxon_2667527439_annotated_assembly	Scaffold	Actinacidiphila guanduensis	98.85	8220839	0	75	NO	NO	NO	NO
GCF_900112505.1_IMG-taxon_2617270931_annotated_assembly	Scaffold	Devosia psychrophila	97.6	4328295	0	75	YES	NO	YES	YES
GCF_900182915.1_IMG-taxon_2724679732_annotated_assembly	Contig	Neorhodopirellula lusitana	91.97	7777421	0	75	NO	NO	NO	NO
GCF_900636765.1_44503_A02	Complete Genome	Neisseria canis	98.9	2569389	0	75	YES	YES	YES	YES
GCF_900638655.1_58635_F02	Complete Genome	Pragia fontium	98.55	4038704	0	75	NO	NO	YES	NO
GCF_000015305.1_ASM1530v1	Complete Genome	Mycolicibacterium vanbaalenii PYR-1	99.96	6491865	0	74	NO	NO	NO	NO
GCF_000284155.1_ASM28415v1	Complete Genome	Rickettsia australis str. Cutlack	98.01	1323280	3	74	YES	NO	YES	NO
GCF_000340985.1_genetic_mechanisms_of_environmental_adaptability	Contig	Nocardiopsis valliformis DSM 45023	96.98	7145336	0	74	NO	NO	NO	NO
GCF_000383415.1_ASM38341v1	Scaffold	Hyphomicrobium zavarzinii ATCC 27496	98.76	4651795	0	74	YES	YES	YES	YES
GCF_000421265.1_ASM42126v1	Contig	Thalassospira lucentensis MCCC 1A00383 = DSM 14000	99.64	4746254	10	74	YES	YES	YES	YES
GCF_000702505.1_ASM70250v1	Contig	Thermogemmatispora carboxidivorans	97.87	5607959	0	74	NO	NO	NO	NO
GCF_000711725.1_ASM71172v1	Contig	Roseomonas aerilata DSM 19363	75.2	6428469	0	74	NO	NO	NO	NO
GCF_000744655.1_ASM74465v1	Contig	Streptacidiphilus rugosus AM-16	96.68	9002860	0	74	NO	NO	NO	NO
GCF_000744705.1_ASM74470v1	Contig	Streptacidiphilus albus JL83	95.52	9915093	0	74	NO	NO	NO	NO
GCF_000745965.1_ASM74596v1	Scaffold	Edaphobacter aggregans DSM 19364	99.41	8177135	0	74	NO	NO	NO	NO
GCF_000974985.2_ASM97498v2	Contig	Streptomyces mangrovisoli	100	9165825	0	74	NO	NO	NO	NO
GCF_001267885.1_ASM126788v1	Complete Genome	Streptomyces ambofaciens ATCC 23877	99.11	8393598	0	74	NO	NO	NO	NO
GCF_001921205.1_ASM192120v1	Contig	Actinophytocola xanthii	99.67	8345635	0	74	NO	NO	NO	NO
GCF_002154615.1_ASM215461v1	Scaffold	Streptomyces recifensis	94.95	6184501	0	74	NO	NO	NO	NO
GCF_002902965.1_ASM290296v1	Complete Genome	Paraburkholderia hospita	99.78	11527706	0	74	NO	NO	NO	NO
GCF_003258595.1_ASM325859v1	Contig	Acuticoccus sediminis	96.71	7763538	0	74	NO	NO	NO	NO
GCF_003289645.1_ASM328964v1	Contig	Actinomadura craniellae	91.93	7503577	0	74	NO	NO	NO	NO
GCF_003601975.1_ASM360197v1	Contig	Mesorhizobium waimense	99.18	8154593	0	74	NO	NO	NO	NO
GCF_003985155.1_ASM398515v1	Scaffold	Rhizobium vallis	99.88	7115113	0	74	YES	NO	YES	YES
GCF_004361835.1_ASM436183v1	Contig	Stakelama pacifica	99.45	3981765	3	74	YES	NO	YES	YES
[truncated: 15,721 more rows]

## Sheet: Table S5
Table S5. Bacterial genomes initially found to have NTS and used to define the NTS-like search sequence
Species	Strain	Accession	Source
Ahrensia sp	R2A130	GCA_000179775.1	NCBI
Aquaspirillum sp	LM1	GCA_002002905.1	NCBI
Azospirillum lipoferum	4B	GCA_000283655.1	NCBI
Bermanella marisrubri	RED65	GCA_012295615.1	NCBI
Bradyrhizobium sp	BTAi1	GCA_000015165.1	NCBI
Chitinilyticum aquatile	DSM 21506	GCA_000430805.1	NCBI
Chlorobaculum parvum	NCIB 8327	GCA_000020505.1	NCBI
Dehalogenimonas lykanthroporepellens	BL-DC-9	GCA_000143165.1	NCBI
Desulfobulbaceae bacterium	A2	GCA_002083975.1	NCBI
Francisella novicida	FTG	GCA_000156415.1	NCBI
Hyphomicrobium denitrificans	ATCC 51888	GCA_000143145.1	NCBI
Legionella pneumophila	Paris	GCA_000048645.1	NCBI
Lysobacter concretionis	Ko07	GCA_000768345.1	NCBI
Methylotenera sp	301	GCA_000093025.1	NCBI
Neisseria elongata	ATCC 29315	GCA_000818035.1	Nyongesa et al. 2022
Neisseria meningitdis	8013	GCA_000026965.1	NCBI
Neisseria wardworthii	DSM 22245	GCA_014054885.1	Nyongesa et al. 2022
Nitrosomonas sp	AL212	GCA_000175095.1	NCBI
Nocardia huaxiensis	WCH-YHL-001	GCA_013744875.1	NCBI
Oceanithermus profundum	DSM 14977	GCA_000183745.1	NCBI
Pseudoxanthomonas gei	KCTC 32298	GCA_010119615.1	NCBI
Rickettsia felis	URRWXCal2	GCA_000012145.1	NCBI
Shewanella putrefaciens	CN-32	GCA_000016585.1	NCBI
Sphingobium japonicum	UT26S	GCA_000091125.1	NCBI
Sphingomonas wittichii	RW1	GCA_000016765.1	NCBI
Thioalkalimicrobium cyclicum	ALM1	GCA_000214825.1	NCBI
Vibrio vulnificus	MO6-24/O	GCA_000186585.1	NCBI
Wolbachia pipientis	wMeI	GCA_000008025.1	NCBI
Xanthomonas massiliensis	SN8	GCA_900018785.1	NCBI

## Sheet: Table S6
Table S6. Bacterial strains used in this study
Strain name	Characteristics	Source
Nm 8013 (2C4.3)	WT strain, derivative of serogroup C isolate 8013. Piliated, adherent, encapsulated. Opa-, Opc-, PilC1+/PilC2+.	1
Nm 8013 (2C4.3) NalR	Strain resistant to nalidixic acid isolated through antibiotic pressure.	This study
Nm 8013 ΔssnA (KO)	SsnA knock-out strain, where a portion of the coding sequence was replaced with ermC (eryR) (generated with pKOssnA::Ery).	This study
Nm 8013 ΔssnA pilEp-ssnA (Compl)	SsnA complemented strain, where the gene was reinserted under a strong promoter next to NMV_0632 locus (eryR, kmR) (generated with pOEssnA::Km).	This study
Nm 8013 rpsLK43R yebN::MC58	Strains used for transformation assays, where the yebN locus flanked by NTS repeats was replaced with the same locus from Nm MC58 (generated with pYebOut::RPLK followed by pYebNOut::Cm)	This study
- WT
- ΔssnA (KO)
- ΔssnA_pilEpssnA (Compl)
Nm 8013 rpsLK43R NTSmut	Strains used for transformation assays, where the NTS repeats from the yebN region all carry the G26A+C49A mutations preventing cleavage by SsnA (generated with pYebOut::RPLK followed by pYebOutG26C49).	This study
- WT
- ΔssnA (KO)
- ΔssnA_pilEpssnA (Compl)
Nm 8013 rpsLK43R yebN::Cm	Strains used for transformation assays, where the yebN gene is replaced by a chloramphenicol resistance gene (generated with pYebOut::RPLK followed by pYebNOut::Cm).	This study
- WT
- ΔssnA (KO)
- ΔssnA_pilEpssnA (Compl)
Nm 8013 rpsLK43R yebN::CmSTOP	Strains used for transformation assays, where the yebN gene is replaced by a chloramphenicol resistance cassette carrying a non-sense mutation (generated with pYebOut::RPLK followed by p5'3'inCmStop).	This study
- WT
- ΔssnA (KO)
- ΔssnA_pilEpssnA (Compl)
Nm 8013 rpsLK43R yebN::CmSTOP 5M3::Km	Strains used for co-culture transformation assays, where the yebN gene is replaced by a chloramphenicol resistance cassette carrying a non-sense mutation, and a kanamycin resistance gene is inserted in an intergenic region elsewhere (next to mltB) (generated with p5M3::Km).	This study
- WT
- ΔssnA (KO)
Neisseria musculi DSM 101846	Commensal species of Neisseria with a chloramphenicol resistance gene inserted in the yebN locus (generated with pMusc1YebOut::Cm).	This study
yebNOut::Cm
Nm LNP24198lux	Luminescent strain expressing porBp-luxCDABE (kmR).	2
Nm LNP24198lux ΔssnA (KO)	SsnA knock-out luminescent strain (kmR, eryR).	This study
Nm LNP20553lux	Luminescent strain expressing porBp-luxCDABE in an intergenic region.	3
Nm LNP20553lux ΔssnA (KO)	SsnA knock-out luminescent strain (eryR).	This study
Nm LNP20553lux ΔssnA pilEp-ssnA (Compl)	SsnA complemented luminescent strain (eryR, kmR).	This study
1	Nassif X, Lowy J, Stenberg P, O'Gaora P, Ganji A, So M. 1993. Antigenic variation of pilin regulates adhesion of Neisseria meningitidis to human epithelial cells. Mol Microbiol 8:719–725. doi: 10.1111/j.1365-2958.1993.tb01615.x.
2	Alonso J-M, Guiyoule A, Zarantonelli ML, Ramisse F, Pires R, Antignac A, Deghmane AE, Huerre M, van der Werf S, Taha M-K. 2003. A model of meningococcal bacteremia after respiratory superinfection in influenza A virus-infected mice. FEMS Microbiol Lett 222:99–106.
3	Nyongesa, S., Chenal, M., Bernet, È., Coudray, F. & Veyrier, F. J. Sequential markerless genetic manipulations of species from the Neisseria genus. Canadian Journal of Microbiology (2022).

## Sheet: Table S7
Table S7. Plasmids used in this study
Plasmid	Descritpion	Plasmid source	Reference Plasmid source	Insert source	Primers	Primers Insertion site (5>3)	Resistance used	Reference final plasmid
pET-22b(+)::NMV0044::Amp	For the purification of His-SsnA WT from N. meningitidis.	pET-22b(+)	https://www.emdmillipore.com/CA/en/product/pET-Expression-System-22b-Novagen,EMD_BIO-70765?ReferrerURL=https%3A%2F%2Fwww.ecosia.org%2F	Codon-optimized synthesis			Ampicillin	this study
pET15-MHL_NMV0044	For the purification of His-SsnA WT from N. meningitidis.	pET15-MHL	https://www.addgene.org/26092/	Digestion product of: pET-22b(+)::NMV0044::Amp		NdeI/XhoI	Ampicillin	this study
pET15-MHL_NMV0044_Y6A	For the purification of His-SsnA Y6A from N. meningitidis.	pET15-MHL_NMV0044		Directed mutagenesis	Y6A_F CAGCCTGCAGTTGCTATTTTAGCAAGCCA; Y6A_R GCTAAAATAGCAACTGCAGGCTGCAT		Ampicillin	this study
pET15-MHL_NMV0044_Y17A	For the purification of His-SsnA Y17A from N. meningitidis.	pET15-MHL_NMV0044		Directed mutagenesis	Y17A_F GCACGTTAGCAATTGGCGTTACATCTGA; Y17A_R ACGCCAATTGCTAACGTGCCATTACGT		Ampicillin	this study
pET15-MHL_NMV0044_E64A	For the purification of His-SsnA E64A from N. meningitidis.	pET15-MHL_NMV0044		Directed mutagenesis	E64A_F TACTCGGGCTAAACAGCTGAAGAAATGGAACAGG E64A_R TTTCTTCAGCTGTTTAGCCCGAGTAATTGC		Ampicillin	this study
pGEX_NMV0044	For the purification of GST-SsnA WT from N. meningitidis.	pGEX-4T-1		PCR product	pOEG44F GGGGGATCCATGCAGCCTGCGGTTT pOE44R CGGGAATTCCGGGCTAAATAATATCAAAC	BamHI/EcoRI	Ampicillin	this study
pET-15b(+)_ssnA_Nelon	For the purification of His-SsnA WT from N. elongata.	pET-15b(+)		Codon-optimized synthesis		EcoRV	Ampicillin	this study
pET-15b(+)_ssnA_Wpip	For the purification of His-SsnA WT from W.pipientis	pET-15b(+)		Codon-optimized synthesis		EcoRV	Ampicillin	this study
pET15-MHL_ssnA_Nwad	For the purification of His-SsnA WT from N. wad.	pET-15b(+)		PCR products from genomic DNA of N. wad.	NdeI_ssnANwad_F : ATCCATatgaagcagccggccgt ssnANwad_XhoI_R : GCCACTCGAGctaaccgattatttcctgccac	NdeI/XhoI	Ampicillin	this study
pKOssnA::Ery	To delete ssnA from N. meningitidis 8013.	pGEM-T	https://www.snapgene.com/plasmids/basic_cloning_vectors/pGEM-T	PCR products from genomic DNA of N. meningitidis 8013 and from another plasmid with an Ery marker	NMV0044F gtctatcggtaaactcgccaaata NMV0044R ctagaatcccggactttcagataa Eramup cagcttgccgtttgaatgggacctctgtagtttcttgg Eram3 gcaaacttaagagtgtgttgatag	TAcloning / BsaBI-AvaI	Erythromycin	this study
pOEssnA::Km	To overexpress or complement ssnA via the pilE promoter.	p5pilEp3::Km	https://journals.plos.org/plosgenetics/article?id=10.1371/journal.pgen.1005338	PCR product from genomic DNA of N. meningitidis 8013	GspABspHIF GGTTCATGATGCAGCCTGCGGTTTAT; GspAPstIR CGCCTGCAGGGGAATGACGGGCTA	BspHI/PstI	Kanamycin	this study
pVD300recA6	To generate a strain with the RecA recombinase inducible with IPTG.						Kanamycin / Tetracycline	https://www.addgene.org/37062/
pGEM ::Km	To generate a strain with the RecA recombinase inducible with IPTG.	pGEM-T					Kanamycin	https://onlinelibrary.wiley.com/doi/full/10.1111/mmi.12153
pKOYebN::Sp	Replace yebN gene with SmR. Integrative plasmid that harbor the YebN region containing NTS repeats.	pKOYebN::Km	https://journals.plos.org/plospathogens/article?id=10.1371/journal.ppat.1002261				Spectinomycin	https://journals.plos.org/plospathogens/article?id=10.1371/journal.ppat.1002261
pCompInd::Cm	integrative plasmid		https://journals.asm.org/doi/10.1128/jb.187.10.3421-3430.2005				Choramphenicol	https://journals.asm.org/doi/10.1128/jb.187.10.3421-3430.2005
p5'3'inCm	Replace yebN gene with CmR. Shorter dans pKOYebN::Sp	pJET2.1	https://www.thermofisher.com/order/catalog/product/K1231	PCR products (fusion of 3 fragments 5' in and 3' in from pKOYebN::Sm and CmR from pCompInd::Cm)	CmR_KOYebN_F: atgacgggatgcgggttttcgtgcggcatttttgcatttttttgcttttgctataatccgccctttttgaggacgggtgcggtccgtgatatagattgaaaagtggatag; CmR_PpuMI_R: aaggctaggacccGAAGTGCGCCCTTTAGTTCC; 3'RS_R agggttgaagtaaaaaatatggcgg; 3'in_F aaaaccagtacgtcgttgcc; 5'in_Rcctcaaaaagggcggattatagc; 5'RS_F gggggcattatgtggatgga		Chloramphenicol	this study
p5'3'OutCmStop	Replace yebN gene with mutated CmR. Shorter dans pKOYebN::Sp	pJET2.1	https://www.thermofisher.com/order/catalog/product/K1231	PCR product (Fusion of 2 fragments) from gDNA of Nm 8013 rpsLK43R yebN::Cm	5'out_F : cgtttgttcaattacgccgacg CmSTOP_R : aatatcgagtttataccgtcatactatatgtgc CmSTOP_F : tagtatgacggtataaactcgatatttctaag 3'out_R : tcaacggcgtagaatgggac		Ampicillin	this study
pYebOutG26C49	YebN region with the double mutation G26A and C49A in each NTS.	pUC57		Synthesis			Ampicillin	this study
p5'3'inCmMut2	Replace yebN gene with CmR. Shorter dans pKOYebN::Sp and with the double mutation G26A and C49A in each NTS.	pUC57		PCR products (fusion of 3 fragments 5' in and 3' in from pKOYebNoutMut2 and CmR from pCompInd::Cm)	CmR_KOYebN_F: atgacgggatgcgggttttcgtgcggcatttttgcatttttttgcttttgctataatccgccctttttgaggacgggtgcggtccgtgatatagattgaaaagtggatag; CmR_PpuMI_R: aaggctaggacccGAAGTGCGCCCTTTAGTTCC; 3'RS_R agggttgaagtaaaaaatatggcgg; 3'in_F aaaaccagtacgtcgttgcc; 5'in_Rcctcaaaaagggcggattatagc; 5'RS_F gggggcattatgtggatgga	BglII	Chloramphenicol	this study
pKOlgtFrfaK ::Cm	Integrative plasmid without NTS, modifying the lgtF-rfaK locus.	pUC57		Synthesis / PCR product (Cm)	CmR-BglII_R GGAGATCTCGGAATTTACGGAGGATAAATGATGC BglII-Cmr_F ACAGATCTGCAGGACGCACT	BglII	Chloramphenicol	this study
pKONMV_0504 ::Cm	Integrative plasmid with NTS, modifying the NMV_0504 locus.	pUC57		Synthesis / PCR product (Cm)	CmR-BglII_R GGAGATCTCGGAATTTACGGAGGATAAATGATGC BglII-Cmr_F ACAGATCTGCAGGACGCACT	BglII	Chloramphenicol	this study
pKOopaA::Cm	Integrative plasmid with NTS, modifying the opaA locus.	pUC57		Synthesis / PCR product (Cm)	CmR-BglII_R GGAGATCTCGGAATTTACGGAGGATAAATGATGC BglII-Cmr_F ACAGATCTGCAGGACGCACT	BglII	Chloramphenicol	this study
pYebNOut	5'0ut fused to 3'Out (does not contain NTS region nor yebN)	pJET2.1	https://www.thermofisher.com/order/catalog/product/K1231	PCR product of the 5'out fused to 3'out DNA of N. meningitidis 8013	5'out_F : cgtttgttcaattacgccgacg; 5'out_R (BamHI-EcoRI) : AGTATgaattcggatccATGccttacagcaaaccagcctg; 3'out_R : tcaacggcgtagaatgggac; 3'out_F (BamHI-EcoRI) : CATggatccgaattcATACTcgtcagaccgcgttgtcg		Ampicillin	this study
pYebNOut::RPLK	Allows substitution of the entire yebN region and NTS with the counter-selection cassette Km.	pYebNOut		pRPLK		BglII	Kanamycin	this study
pYebNOut::Cm	Allows substitution solely of the yebN gene with the counter-selection cassette Cm.	pJET2.1	https://www.thermofisher.com/order/catalog/product/K1231	gDNA of Nm 8013 rpsLK43R yebN::Cm	5'out_F : cgtttgttcaattacgccgacg, 3'out_R : tcaacggcgtagaatgggac		Kanamycin	this study
p5M3::Km	used to complement a MltB mutant	pGEM::Km	https://onlinelibrary.wiley.com/doi/full/10.1111/mmi.12153				Kanamycin	https://journals.plos.org/plosgenetics/article?id=10.1371/journal.pgen.1005338
p5′3′Nmusc1	Plasmid used to insert gene in N. musculi	pUC57		synthesis			Ampicillin	https://cdnsciencepub.com/doi/full/10.1139/cjm-2022-0024?rfr_dat=cr_pub++0pubmed&url_ver=Z39.88-2003&rfr_id=ori%3Arid%3Acrossref.org
p5′3′Nmusc1YebNOut::Cm	Plasmid used to insert gene in N. musculi	p5′3′Nmusc1		Digestion of pYebOut::Cm		BglII and PvuI	Chloramphenicol	this study

## Sheet: Table S8
	Table S8. Primers and fluorescent oligonucleotides used in this study
	Oligo name		Sequence
	NTS75rev		[6FAM]ACGGTTTCTTTAGATTTTACGTTCTAGATTCCCGCTTTCGCGGGAATGACGGAATATTTTTGAATTTGATAAAAA
	NTS75		[6FAM]TTTTTATCAAATTCAAAAATATTCCGTCATTCCCGCGAAAGCGGGAATCTAGAACGTAAAATCTAAAGAAACCGT
	NTS75-3’		TTTTTATCAAATTCAAAAATATTCCGTCATTCCCGCGAAAGCGGGAATCTAGAACGTAAAATCTAAAGAAACCGT[6FAM]
	NTS1		[6FAM]GAGGTTTCGGGCAACTTCTAAACCGTCATTCCCGCGCAGGCGGGAATCCAGACCATTGGACAGCAGCAATATTCAAAGATTATCTGAAAGTCCGGGATTC
	NTS2		[6FAM]GTCATTCCCACGAACCTACATTCCGTCATTCCCACGAAAGTGGGAATCTAGAATCTCTAAAGCTTCAGCTAACCTTTGAATATTGCTGTTGTTCTAAGGT
	NTS3		[6FAM]ATCCCGTCATTCCCGCCACTTTCCGTCATTCCCGCGAAAGCGGGAATCTAGAATCTCGGACTTTCAGATAATCTTTGAATATTGCTGTTGTTCTAAGGTC
	NTS4		[6FAM]TAAATGACCCCAACTTAAAATCCCGTCATTCCCGCGCAGGCGGGAATCTAGGTCTGTCGGTGCGGAAACTTATCGGGTAAAACGGTTTCTTGAGATTTTG
	NTS5		[6FAM]GTCATTCCCACGAACCTACATTCCGTCATTCCCACGAAAGTGGGAATCCAGTGCGTTGAGTTTCAGTCATTTCCAATAAATTGCCTTAGTATTGAATGTC
	NTS100		[6FAM]AATTCAAAAATATTCCGTCATTCCCGCGAAAGCGGGAATCTAGAACGTAAAATCTAAAGAAACCGTTTTATCCGATAAGTTTCCGCACCGACAGACCTGG
	NTS37		[6FAM]AAAAATATTCCGTCATTCCCGCGAAAGCGGGAATCTA
	NTS28		[6FAM]CCGTCATTCCCGCGAAAGCGGGAATCTA
	NTS37_RNA		[6FAM]AAAAAUAUUCCGUCAUUCCCGCGAAAGCGGGAAUCUA
	Cy5-NTS75		[Cy5]TTTTTATCAAATTCAAAAATATTCCGTCATTCCCGCGAAAGCGGGAATCTAGAACGTAAAATCTAAAGAAACCGT
	Cy5-NTS75-G26A		[Cy5]TTTTTATCAAATTCAAAAATATTCCATCATTCCCGCGAAAGCGGGAATCTAGAACGTAAAATCTAAAGAAACCGT
	Cy5-NTS75-C49A		[Cy5]TTTTTATCAAATTCAAAAATATTCCGTCATTCCCGCGAAAGCGGGAATCTAGAACGTAAAATCTAAAGAAACCGT
	Cy5-NTS28		[Cy5]CCGTCATTCCCGCGAAAGCGGGAATCTA
	NTS_Nelon_F		[6FAM]TTCACCCTGGTACCCCTTGAATTTCGTCATTCCCGCGCAGGCGGGAATCCAGACTCTTAGGTTTCAGGAATCTT
	NTS_Nelon_R		[6FAM]AAGATTCCTGAAACCTAAGAGTCTGGATTCCCGCCTGCGCGGGAATGACGAAATTCAAGGGGTACCAGGGTGAA
	NTS1_38		[6FAM]TTTTTATCAAATTCAAAAATATTCCGTCATTCCCGCGA
	NTS1_38Quenche1		[6FAM]TTTTTATCAAATTCAAAAATATTCCGTCATTCCCGCGA[BHQ1]
	RS75HPmod1		[6FAM]TTTTTATCAAATTCAAAAATATTCCGTCTTAGGGGCGAAAGCCCCTAACTAGAACGTAAAATCTAAAGAAACCGT
	NTSvar_F		[6FAM]AAAATGATAGATATAAAAATAGCGCGTCATACTCGGGCTTGACCCGAGTATCTCCCAAACGGTAGGGAAAGGTTT
	NTSvar_R		[6FAM]AAACCTTTCCCTACCGTTTGGGAGATACTCGGGTCAAGCCCGAGTATGACGCGCTATTTTTATATCTATCATTTT
	NTS_Dlyk_F		[6FAM]ATTGTCATTACCCGCTCTTCCCTTTGTCATTACCCGCGAAAGCGGGTAATCCACGGTCAAATAAGCAACAGAAGT
	NTS_Dlyk_R		[6FAM]ACTTCTGTTGCTTATTTGACCGTGGATTACCCGCTTTCGCGGGTAATGACAAAGGGAAGAGCGGGTAATGACAAT
	NTS_Wp3_F		[6FAM]CGGTGGCATGACGGTTAAGTAATTCGTCATCCCGCTACTTGTGAGCGGGATCTCTTGTTAGCGGATGAGATACCG
	NTS_Wp3_R		[6FAM]CGGTATCTCATCCGCTAACAAGAGATCCCGCTCACAAGTAGCGGGATGACGAATTACTTAACCGTCATGCCACCG
	NmHemiF		TAGGGAGAGCGGCAGGTGGGTTTTTATCAAATTCAAAAATATTCCGTCATTCCCGCGATCGATCTGATTCAGCTAATGCTAAATTTAATACGACTCACTA
	RSE75mut	A19	[6FAM]TTTTTATCAAATTCAAAABTATTCCGTCATTCCCGCGAAAGCGGGAATCTAGAACGTAAAATCTAAAGAAACCGT
		T20	[6FAM]TTTTTATCAAATTCAAAAAVATTCCGTCATTCCCGCGAAAGCGGGAATCTAGAACGTAAAATCTAAAGAAACCGT
		A21	[6FAM]TTTTTATCAAATTCAAAAATBTTCCGTCATTCCCGCGAAAGCGGGAATCTAGAACGTAAAATCTAAAGAAACCGT
		T22	[6FAM]TTTTTATCAAATTCAAAAATAVTCCGTCATTCCCGCGAAAGCGGGAATCTAGAACGTAAAATCTAAAGAAACCGT
		T23	[6FAM]TTTTTATCAAATTCAAAAATATVCCGTCATTCCCGCGAAAGCGGGAATCTAGAACGTAAAATCTAAAGAAACCGT
		C24	[6FAM]TTTTTATCAAATTCAAAAATATTDCGTCATTCCCGCGAAAGCGGGAATCTAGAACGTAAAATCTAAAGAAACCGT
		C25	[6FAM]TTTTTATCAAATTCAAAAATATTCDGTCATTCCCGCGAAAGCGGGAATCTAGAACGTAAAATCTAAAGAAACCGT
		G26	[6FAM]TTTTTATCAAATTCAAAAATATTCCHTCATTCCCGCGAAAGCGGGAATCTAGAACGTAAAATCTAAAGAAACCGT
		T27	[6FAM]TTTTTATCAAATTCAAAAATATTCCGVCATTCCCGCGAAAGCGGGAATCTAGAACGTAAAATCTAAAGAAACCGT
		C28	[6FAM]TTTTTATCAAATTCAAAAATATTCCGTDATTCCCGCGAAAGCGGGAATCTAGAACGTAAAATCTAAAGAAACCGT
		A29	[6FAM]TTTTTATCAAATTCAAAAATATTCCGTCBTTCCCGCGAAAGCGGGAATCTAGAACGTAAAATCTAAAGAAACCGT
		T30	[6FAM]TTTTTATCAAATTCAAAAATATTCCGTCAVTCCCGCGAAAGCGGGAATCTAGAACGTAAAATCTAAAGAAACCGT
		T31	[6FAM]TTTTTATCAAATTCAAAAATATTCCGTCATVCCCGCGAAAGCGGGAATCTAGAACGTAAAATCTAAAGAAACCGT
		C32	[6FAM]TTTTTATCAAATTCAAAAATATTCCGTCATTDCCGCGAAAGCGGGAATCTAGAACGTAAAATCTAAAGAAACCGT
		C33	[6FAM]TTTTTATCAAATTCAAAAATATTCCGTCATTCDCGCGAAAGCGGGAATCTAGAACGTAAAATCTAAAGAAACCGT
		C34	[6FAM]TTTTTATCAAATTCAAAAATATTCCGTCATTCCDGCGAAAGCGGGAATCTAGAACGTAAAATCTAAAGAAACCGT
		G35	[6FAM]TTTTTATCAAATTCAAAAATATTCCGTCATTCCCHCGAAAGCGGGAATCTAGAACGTAAAATCTAAAGAAACCGT
		C36	[6FAM]TTTTTATCAAATTCAAAAATATTCCGTCATTCCCGDGAAAGCGGGAATCTAGAACGTAAAATCTAAAGAAACCGT
		G37	[6FAM]TTTTTATCAAATTCAAAAATATTCCGTCATTCCCGCHAAAGCGGGAATCTAGAACGTAAAATCTAAAGAAACCGT
		A38	[6FAM]TTTTTATCAAATTCAAAAATATTCCGTCATTCCCGCGBAAGCGGGAATCTAGAACGTAAAATCTAAAGAAACCGT
		A39	[6FAM]TTTTTATCAAATTCAAAAATATTCCGTCATTCCCGCGABAGCGGGAATCTAGAACGTAAAATCTAAAGAAACCGT
		A40	[6FAM]TTTTTATCAAATTCAAAAATATTCCGTCATTCCCGCGAABGCGGGAATCTAGAACGTAAAATCTAAAGAAACCGT
		G41	[6FAM]TTTTTATCAAATTCAAAAATATTCCGTCATTCCCGCGAAAHCGGGAATCTAGAACGTAAAATCTAAAGAAACCGT
		G42	[6FAM]TTTTTATCAAATTCAAAAATATTCCGTCATTCCCGCGAAAGDGGGAATCTAGAACGTAAAATCTAAAGAAACCGT
		G43	[6FAM]TTTTTATCAAATTCAAAAATATTCCGTCATTCCCGCGAAAGCHGGAATCTAGAACGTAAAATCTAAAGAAACCGT
		G44	[6FAM]TTTTTATCAAATTCAAAAATATTCCGTCATTCCCGCGAAAGCGHGAATCTAGAACGTAAAATCTAAAGAAACCGT
		G45	[6FAM]TTTTTATCAAATTCAAAAATATTCCGTCATTCCCGCGAAAGCGGHAATCTAGAACGTAAAATCTAAAGAAACCGT
		A46	[6FAM]TTTTTATCAAATTCAAAAATATTCCGTCATTCCCGCGAAAGCGGGBATCTAGAACGTAAAATCTAAAGAAACCGT
		A47	[6FAM]TTTTTATCAAATTCAAAAATATTCCGTCATTCCCGCGAAAGCGGGABTCTAGAACGTAAAATCTAAAGAAACCGT
		T48	[6FAM]TTTTTATCAAATTCAAAAATATTCCGTCATTCCCGCGAAAGCGGGAAVCTAGAACGTAAAATCTAAAGAAACCGT
		C49	[6FAM]TTTTTATCAAATTCAAAAATATTCCGTCATTCCCGCGAAAGCGGGAATDTAGAACGTAAAATCTAAAGAAACCGT
		T50	[6FAM]TTTTTATCAAATTCAAAAATATTCCGTCATTCCCGCGAAAGCGGGAATCVAGAACGTAAAATCTAAAGAAACCGT
		A51	[6FAM]TTTTTATCAAATTCAAAAATATTCCGTCATTCCCGCGAAAGCGGGAATCTBGAACGTAAAATCTAAAGAAACCGT
	[6FAM]: 6-Carboxyfluorescin. [Cy5]: Cyanine-5 in 5’. [BHQ1] Black Hole Quencher 1. The 28nt NTS repeats are underlined.
	ssnA_F		GCGTTACATCTGATTTGGTGC
	ssnA_R		TGCAATTTCCAAGCCCTGTT
	gyrA_F		ACTCCGCTGCAAGACAGTTT
	gyrA_R		GAAAAGCGTACGTCGGGTAA
	RS39_75Long (polyA)		AAAAAAAAAAAAAAAAAAAAAAAAAAGCGGGAATCTAGAACGTAAAATCTAAAGAAACCGTAAAAAAAAAAAAAAAAAAAAAAAAAAAAAAAAAAAAAAA
	Y6A_F		CAGCCTGCAGTTGCTATTTTAGCAAGCCA;
	Y6A_R		GCTAAAATAGCAACTGCAGGCTGCAT
	Y17A_F		GCACGTTAGCAATTGGCGTTACATCTGA;
	Y17A_R		ACGCCAATTGCTAACGTGCCATTACGT
	E64A_F		TACTCGGGCTAAACAGCTGAAGAAATGGAACAGG
	E64A_R		TTTCTTCAGCTGTTTAGCCCGAGTAATTGC
	pOEG44F		GGGGGATCCATGCAGCCTGCGGTTT
	pOE44R		CGGGAATTCCGGGCTAAATAATATCAAAC
	NdeI_ssnANwad_F		ATCCATATGAAGCAGCCGGCCGT
	ssnANwad_XhoI_R		GCCACTCGAGCTAACCGATTATTTCCTGCCAC
	NMV0044F		GTCTATCGGTAAACTCGCCAAATA
	NMV0044R		CTAGAATCCCGGACTTTCAGATAA
	GspABspHIF		GGTTCATGATGCAGCCTGCGGTTTAT;
	GspAPstIR		CGCCTGCAGGGGAATGACGGGCTA
	CmR_KOYebN_R		GTGCTTCAGCACCTTAGAGAATCGTTCTCTTTGAGCCAAGGCGAGGCAACGACGTACTGGTTTTTGTTAATCCACTATATTTTCCGACAGAAGTGCGCCCTTTAGTTCCT
	CmR_KOYebN_F		ATGACGGGATGCGGGTTTTCGTGCGGCATTTTTGCATTTTTTTGCTTTTGCTATAATCCGCCCTTTTTGAGGACGGGTGCGGTCCGTGATATAGATTGAAAAGTGGATAG
	CmR-BglII_R		GGAGATCTCGGAATTTACGGAGGATAAATGATGC
	BglII-Cmr_F		ACAGATCTGCAGGACGCACT
	CmR_PpuMI_R		AAGGCTAGGACCCGAAGTGCGCCCTTTAGTTCC
	3'RS_R		AGGGTTGAAGTAAAAAATATGGCGG
	3'in_F		AAAACCAGTACGTCGTTGCC
	5'in_R		CCTCAAAAAGGGCGGATTATAGC
	5'RS_F		GGGGGCATTATGTGGATGGA
	5'out_F		CGTTTGTTCAATTACGCCGACG
	CmSTOP_R		AATATCGAGTTTATACCGTCATACTATATGTGC
	CmSTOP_F		TAGTATGACGGTATAAACTCGATATTTCTAAG
	3'out_R		TCAACGGCGTAGAATGGGAC
	5'out_R (BamHI-EcoRI)		AGTATGAATTCGGATCCATGCCTTACAGCAAACCAGCCTG
	3'out_R		TCAACGGCGTAGAATGGGAC
	3'out_F (BamHI-EcoRI)		CATGGATCCGAATTCATACTCGTCAGACCGCGTTGTCG
	LongueTige (LT)		ATCGATCGCGGGAATCTAGAACGTAAAATCTAAAGAAACCGTAT
	NTS39_75		AAGCGGGAATCTAGAACGTAAAATCTAAAGAAACCGT
	NmHemiR		TAGTGAGTCGTATTAAATTTAGCATTAGCTGAATCAGATCGATCGCGGGAATGACGGAATATTTTTGAATTTGATAAAAACCCACCTGCCGCTCTCCCTA
	NTS75T7F		TAGGGAGAGCGGCAGGTGGGACGGTTTCTTTAGATTTTACGTTCTAGATTCCCGCTTTCGCGGGAATGACGGAATATTTTTGAATTTGATAAAAAGTCGGGTAGGTAATACGACTCACTA
	NTS75T7R		TAGTGAGTCGTATTACCTACCCGACTTTTTATCAAATTCAAAAATATTCCGTCATTCCCGCGAAAGCGGGAATCTAGAACGTAAAATCTAAAGAAACCGTCCCACCTGCCGCTCTCCCTA
	Nm3975T7F		TAGGGAGAGCGGCAGGTGGGAGCGGGAATCTAGAACGTAAAATCTAAAGAAACCGTATCGATCTGATTCAGCTAATGCTAAATTTAATACGACTCACTA
	Nm3975T7R		TAGTGAGTCGTATTAAATTTAGCATTAGCTGAATCAGATCGATACGGTTTCTTTAGATTTTACGTTCTAGATTCCCGCTCCCACCTGCCGCTCTCCCTA
	T7R		GCCGCTCTCCCTATAGTGAGTCGTATTA
	T7F		TAATACGACTCACTATAGGGAGAGCGGC
